# Supplementary material for: Photoinduced generation of ketyl radicals and application in C–C coupling withoutexternal photocatalyst
Source: Royal Society of Chemistry journal article supplement (doi:10.1039/d3gc00054k), 2023-01-01

## Supporting Information

### Photoinduced Generation of Ketyl Radicals and Application in C–C Coupling without External Photocatalyst

Yonggang Yan<sup>a</sup>, Gang Li<sup>a</sup>, Jiani Ma<sup>a</sup>, Chao Wang<sup>a</sup>, Jianliang Xiao<sup>b</sup> and Dong Xue<sup>\*a</sup>

<sup>a</sup> Key Laboratory of Applied Surface and Colloid Chemistry, Ministry of Education, School of Chemistry and Chemical Engineering, Shaanxi Normal University, Xi'an, 710119, China, E-mail: xuedong\_welcome@snnu.edu.cn

<sup>b</sup> Department of Chemistry, University of Liverpool, Liverpool, L69 7ZD, United Kingdom

### Table of Content

|                                                       |     |
|-------------------------------------------------------|-----|
| 1. General Information.....                           | S1  |
| 2. Optimization of Reaction Condition.....            | S2  |
| 3. ns-TA Experiments and DFT Calculation .....        | S3  |
| 4. Control Experiments .....                          | S5  |
| 5. Application of Ketyl Radical in C-C Coupling ..... | S6  |
| 6. General Procedure .....                            | S7  |
| 7. Gram-Scale Procedure.....                          | S9  |
| 8. Characterization Data.....                         | S10 |
| 9. Reference .....                                    | S34 |
| 10. Copies of NMR Spectra .....                       | S36 |

## 1. General Information

All reactions were performed with Schlenk-tube in the glovebox unless otherwise stated. Commercial reagents were used as purchased without further purification. Analytical thin layer chromatography (TLC) was performed on precoated silica gel 60 F254 plates and visualized by UV light (254 nm) or by staining with phosphomolybdic acid alcoholic solution or triketohydrindene alcoholic solution.

The general photochemical reactions were carried with 9 W purple LED (390-395 nm, composed of 3 LED units in series, LED Driver: XC-12W900-OS), the optical power up to 210 mw at 1 cm axis distance detected by Thorlabs' Optical Power Meter (PM100D, S120VC). The LED were purchased from Zhuhai UV Optoelectronics Co., LTD. (P/N: CUN96B1B).

$^1\text{H}$  NMR spectra,  $^{19}\text{F}$  NMR spectra and  $^{13}\text{C}$  NMR spectra were recorded at 400 MHz, 376 MHz, 100 MHz on a Bruker 400 spectrometer. All chemical shifts in  $^1\text{H}$ NMR spectra were given in parts per million (ppm) relative to the residual  $\text{CDCl}_3$  (7.26 ppm) or  $\text{DMSO-}d_6$  (2.50 ppm) as internal standards and coupling constants ( $J$ ) were given in Hertz (Hz).  $^1\text{H}$  NMR data were reported as follows: chemical shift, multiplicity (s = singlet, d = doublet, t = triplet, q = quartet, m = multiplet, dd = doublet of doublets, dt = doublet of triplets, dq = doublet of quartets, br = broad), coupling constants, the number of protons ( $n$ ) for a given resonance was indicated by  $n\text{H}$ .  $^{19}\text{F}$  NMR chemical shifts were reported in ppm.  $^{13}\text{C}$  NMR chemical shifts were reported in ppm relative to the central peak of  $\text{CDCl}_3$  (77.16 ppm) or  $\text{DMSO-}d_6$  (39.52 ppm) as internal standards. HRMS data were obtained by using ESI method. HRMS data were obtained by ESI or APCI method with Bruker mass spectrometer (MAXIS). EPR were recorded with Bruker E500 electron paramagnetic spectrometer. The ns-TA experiments were conducted using LP980 laser flash spectrometer (Edinburgh Instruments).

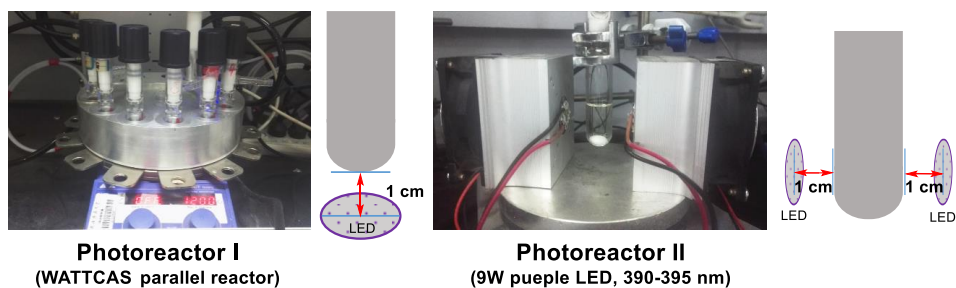

**Figure S1.** Pictures of photoreactor

## 2. Optimization of Reaction Condition

### 2.1 Optimization for pinacol coupling of benzaldehyde.

**Table S1.** Screening of light source (**Photoreactor I**)

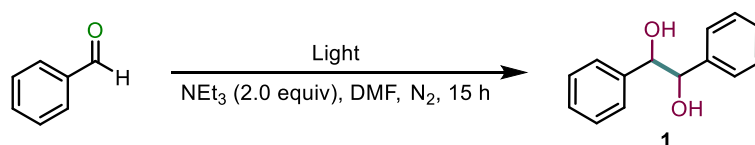

| Entry | Light                   | Yield of <b>1</b> <sup>a</sup> |
|-------|-------------------------|--------------------------------|
| 1     | white LED               | -                              |
| 2     | green LED (530 nm)      | -                              |
| 3     | blue LED (460-465 nm)   | -                              |
| 4     | purple LED (395-400 nm) | 53%                            |
| 5     | UV LED (360-365 nm)     | 44%                            |

**Reaction conditions:** Benzaldehyde (1.0 equiv, 0.4 mmol),  $\text{NEt}_3$  (2.0 equiv, 0.8 mmol), DMF (4 mL), 3 W LED (**Photoreactor I**). a: NMR yields.

**Table S2.** Screening of base (**Photoreactor I**)

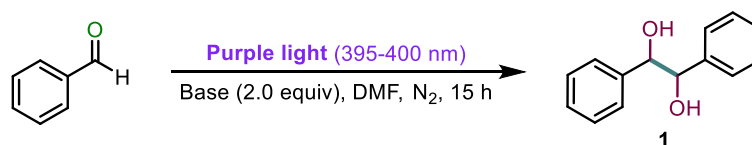

| Entry | Base                                 | Yield of <b>1</b> <sup>a</sup> |
|-------|--------------------------------------|--------------------------------|
| 1     | DABCO                                | 21%                            |
| 2     | DBU                                  | 28%                            |
| 3     | <i>i</i> -Pr <sub>2</sub> NEt        | 68%                            |
| 4     | $\text{Et}_3\text{N}$                | 53%                            |
| 5     | N,N-Dicyclohexylmethylamine          | 46%                            |
| 6     | N,N,N',N'-Tetramethylethylenediamine | 25%                            |

**Reaction conditions:** Benzaldehyde (1.0 equiv, 0.4 mmol), Base (2.0 equiv, 0.8 mmol), DMF (4 mL), 3 W purple LED (395-400 nm, **Photoreactor I**). a: NMR yields.

**Table S3.** Screening of solvent (**Photoreactor I**)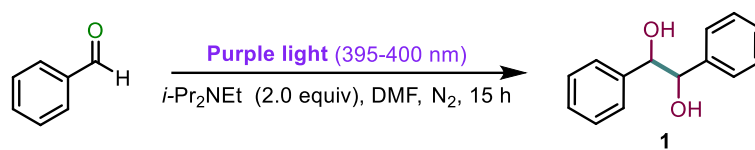

| Entry | Solvent                    | Yield of <b>1</b> <sup>a</sup> |
|-------|----------------------------|--------------------------------|
| 1     | H <sub>2</sub> O           | 46%                            |
| 2     | DCM                        | 48%                            |
| 3     | MeCN                       | 75%                            |
| 4     | THF                        | 64%                            |
| 5     | DMSO                       | 48%                            |
| 6     | EtOH                       | 59%                            |
| 7     | <i>i</i> -PrOH             | 61%                            |
| 8     | DMF                        | 68%                            |
| 9     | toluene                    | 53%                            |
| 10    | MeCN-H <sub>2</sub> O(3:1) | 99%                            |

**Reaction conditions:** Benzaldehyde (1.0 equiv, 0.4 mmol), *i*-Pr<sub>2</sub>NEt (2.0 equiv, 0.8 mmol), Solvent (4 mL), 3 W purple LED (395-400 nm, **Photoreactor I**). a: NMR yields.

**Table S4.** Comparison between **Photoreactor I** and **Photoreactor II**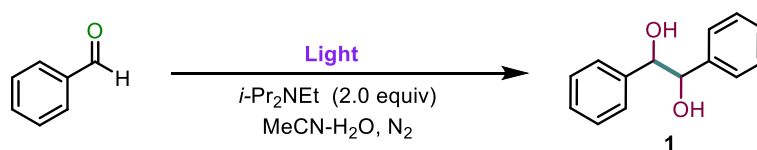

| Setup                                      | Optical Power           | Reaction Time | Yield of <b>1</b> <sup>a</sup> |
|--------------------------------------------|-------------------------|---------------|--------------------------------|
| <b>Photoreactor I</b><br>3 W (395-400 nm)  | ~35 mw/cm <sup>2</sup>  | 15 h          | 99%                            |
| <b>Photoreactor II</b><br>9 W (390-395 nm) | ~210 mw/cm <sup>2</sup> | 3 h           | 99%                            |

**Reaction conditions:** Benzaldehyde (1.0 eq, 0.4 mmol), *i*-Pr<sub>2</sub>NEt (2.0 eq, 0.8 mmol), MeCN/H<sub>2</sub>O (3 mL, 1mL), a: NMR yields.

### 3. ns-TA Experiments and DFT Calculation

The ns-TA experiments were conducted using LP980 laser flash spectrometer (Edinburgh Instruments). A 355 nm laser pulse was used as the pump beam that generated from the third harmonic output of an Nd:YAG laser, the probe light source came from a 150 W xenon lamp. The sample solutions were prepared with an absorbance of 1 at 355 nm using a 1 cm quartz cuvette, and degassing with Ar before testing. The optimized geometries and vibrational frequencies for aldehyde and

relevant intermediates were calculated using DFT under M062X/6-311G\*\* level. UV-vis spectra were simulated by TD-DFT/M062X/6-311G\*\* calculations. The solvation model based on density (SMD) in MeCN ( $\epsilon = 35.688$ ) was used to evaluate the solvent effect. All DFT calculations were conducted using Gaussian 16.

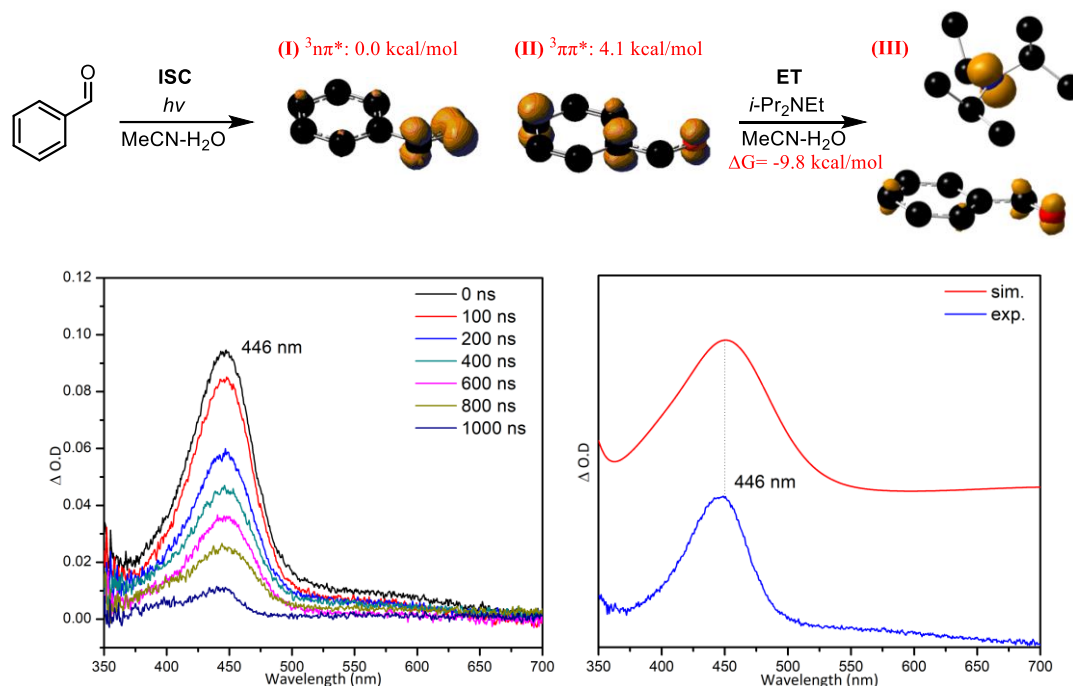

**Figure S2.** Left: ns-TA results acquired after 355 nm photoexcitation of benzaldehyde with *i*-PrNEt in MeCN-H<sub>2</sub>O. Right: comparison of UV-vis spectra of ketyl radical anion between experimental and simulated result.

**Table S5. Cartesian coordinates and total energies for the optimized geometry of ketyl radical anion.**

| Center Number | Atomic Number | Atomic Type | Coordinates (Angstroms) |           |           |
|---------------|---------------|-------------|-------------------------|-----------|-----------|
|               |               |             | X                       | Y         | Z         |
| 1             | 6             | 0           | 1.323177                | -1.327712 | 0.000389  |
| 2             | 6             | 0           | -0.042175               | -1.103347 | -0.000911 |
| 3             | 6             | 0           | -0.571223               | 0.228873  | -0.00084  |
| 4             | 6             | 0           | 0.380334                | 1.297638  | -0.000441 |
| 5             | 6             | 0           | 1.737486                | 1.05332   | 0.000442  |
| 6             | 6             | 0           | 2.240458                | -0.264866 | 0.000454  |
| 7             | 1             | 0           | 1.692153                | -2.349731 | 0.000267  |
| 8             | 1             | 0           | -0.737528               | -1.935673 | -0.000098 |
| 9             | 1             | 0           | 0.015261                | 2.321819  | -0.000312 |
| 10            | 1             | 0           | 2.428748                | 1.891     | 0.000567  |
| 11            | 1             | 0           | 3.307597                | -0.451465 | -0.000854 |
| 12            | 6             | 0           | -1.970253               | 0.481192  | 0.000374  |
| 13            | 8             | 0           | -2.879682               | -0.402089 | 0.000475  |
| 14            | 1             | 0           | -2.255593               | 1.550175  | -0.000171 |

Thermal correction to Gibbs Free Energy= 0.076094  
Sum of electronic and thermal Free Energies= -345.540278  
The number of imaginary frequencies: 0

## 4. Control Experiments

### 4.1 Radical trapping experiments

To verify the photoinduced generation ketyl radical from benzaldehyde, experiments were performed by addition of radical trapping reagents such as TEMPO (2,2,6,6-tetramethylpiperidine-1-oxyl), PBN (*N-tert-butyl-2-phenylnitrone*) and 1,1-diphenylethane respectively.

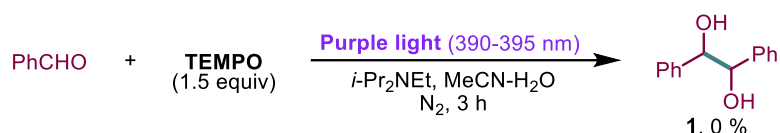

In a glovebox, benzaldehyde (1.0 equiv, 0.4 mmol), *i*-Pr<sub>2</sub>NEt (2.0 equiv, 0.8 mmol), TEMPO (1.5 equiv, 0.6 mmol) were placed into a 10 mL Schlenk-tube with a magnetic stir bar. Then degassed solvent H<sub>2</sub>O (1 mL) and MeCN (3 mL) were added. The reaction mixture was placed in a stirrer and irradiated with 9 W pure LEDs. After 3 hours, the reaction mixture was washed with water and extracted with ethyl acetate (3 x 15 mL). The combined organic layer was dried over anhydrous Na<sub>2</sub>SO<sub>4</sub>, filtrated and concentrated under vacuum. No pinacol product was detected by TLC and HRMS.

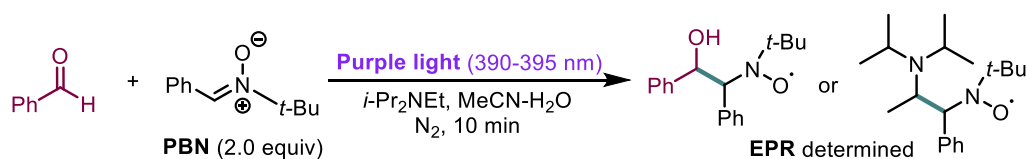

The PBN (2.0 equiv, 0.8 mmol) was added in the above reaction instead of TEMPO, after irradiating for 10 minutes, suitable volume of mixture was transferred to an oven-dried EPR tube. The EPR spectrum was recorded at room temperature.

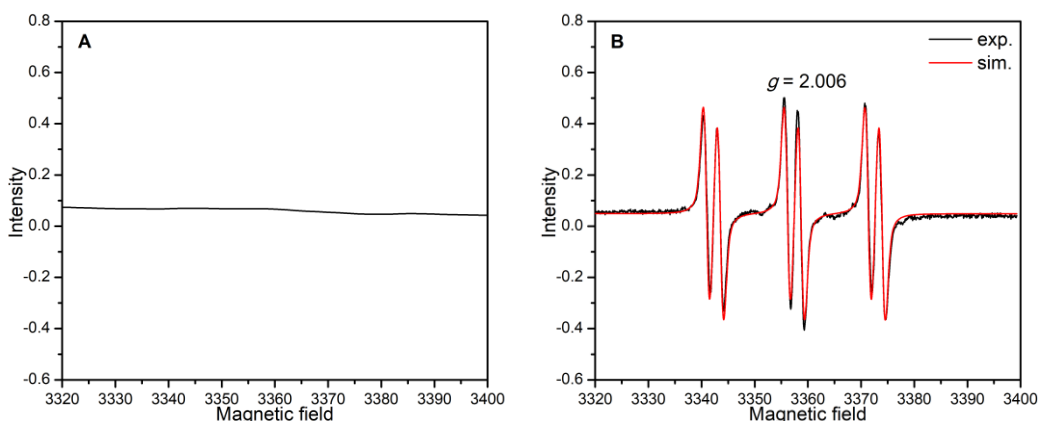

**Figure S3.** EPR spectrum of radical trapping with PBN. (A: no light; B: purple light irradiation)

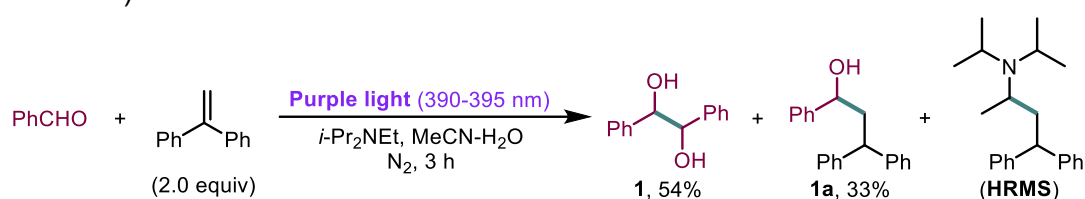

The 1,1-diphenylethylene (2.0 equiv, 0.8 mmol) was added in the above reaction instead of TEMPO. After irradiation, the reaction mixture was firstly determined by HRMS, and then isolated to get the product **1** (54% yield) and **1a** (33% yield). The mass spectrum clearly shows a peak of the coupling product from  $\alpha$ -amino radical and diphenylethylene, **HRMS (ESI)**:  $m/z$  calcd for  $\text{C}_{22}\text{H}_{32}\text{N}$   $[\text{M}+\text{H}]^+$ : 310.2529, found: 310.2525.

## 5. Application of Ketyl Radical in C-C Coupling

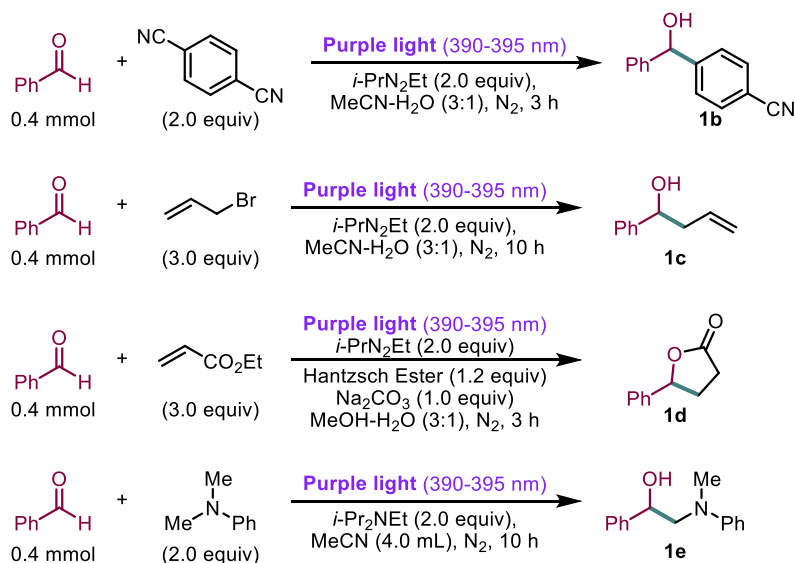

**General procedure for ketyl radical coupling reactions (1b-1e):** In the glovebox, the benzaldehyde (1.0 equiv, 0.4 mmol), *i*-Pr<sub>2</sub>NEt (2.0 or 3.0 equiv), corresponding coupling partners and additives (if necessary) were placed into a 10 mL Schlenk-tube with a magnetic stir bar, respectively, then degassed solvent (4.0 mL) were added. The reaction mixture was placed in a stirrer and irradiated with 9 W pure LEDs (approximately 1 cm away from the tube, the optical power up to 210 mw, the mixture temperature ranging from 38 to 45 °C). After stirring for 3 hours or more, the mixture was washed with water and extracted with ethyl acetate (3 x 15 mL). The combined organic layer was dried over anhydrous Na<sub>2</sub>SO<sub>4</sub>, filtrated and concentrated under vacuum. The desired product was obtained by column chromatography.

## 6. General Procedure

### 6.1 Standard procedure for pinacol coupling of aldehydes and ketones.

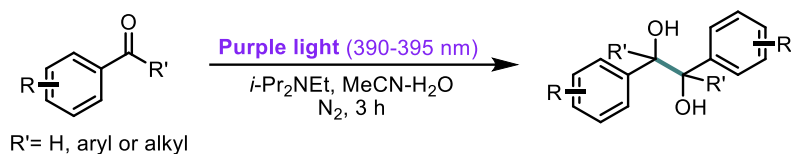

In the glovebox, the aldehydes or ketones (1.0 equiv, 0.4 mmol), *i*-Pr<sub>2</sub>NEt (2.0 equiv, 0.8 mmol) were placed into a 10 mL Schlenk-tube with a magnetic stir bar. Then degassed solvent H<sub>2</sub>O (1mL) and MeCN (3 mL) were added. The reaction mixture was placed in a stirrer and irradiated with 9 W pure LEDs (approximately 1 cm away from the tube, the optical power up to 210 mw, the mixture temperature ranging from 38 to 45 °C). After stirring for 3 hours or more, the reaction mixture was washed with water and extracted with ethyl acetate (3 x 15 mL). The combined organic layer was dried over anhydrous Na<sub>2</sub>SO<sub>4</sub>, filtrated and concentrated under vacuum. The desired product was obtained by column chromatography.

### 6.2 Standard procedure for photoinduced coupling of aldehydes with allyl sulfone.



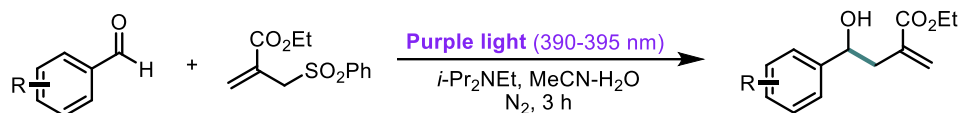

In the glovebox, the aldehyde (1.0 equiv, 0.4 mmol), allyl sulfone (3.0 equiv, 1.2 mmol), *i*-Pr<sub>2</sub>NEt (2.0 equiv, 0.8 mmol) were placed into a 10 mL Schlenk-tube with a magnetic stir bar. Then degassed H<sub>2</sub>O (1mL) and MeCN (3 mL) were added. The reaction mixture was placed in a stirrer and irradiated with 9 W purple LEDs (approximately 1 cm away from the tube, the optical power up to 210 mw, the mixture temperature ranging from 38 to 45 °C). After stirring for 3 hours, the reaction mixture was washed with water and extracted with ethyl acetate (3 x 15 mL). The combined organic layer was dried over anhydrous Na<sub>2</sub>SO<sub>4</sub>, filtrated and concentrated under vacuum. The desired product was obtained by column chromatography.

### 6.3 Standard procedure for the pinacol coupling of imines.

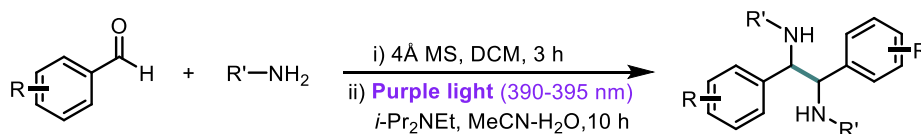

The aldehyde (1.0 equiv, 0.4 mmol), amine (1.0 equiv, 0.4 mmol), 4Å MS (200 mg) and DCM (2 mL) were added to a 10 mL Schlenk-tube with a magnetic stir bar. After stirring at room temperature for 3 h, the mixture was filtrated and concentrated, the crude product was transferred into the glovebox, redissolved in another 10 mL Schlenk-tube with MeCN (3 mL). Then, *i*-Pr<sub>2</sub>NEt (2.0 equiv, 0.8 mmol) and H<sub>2</sub>O (1 mL) were added. The reaction mixture was placed in a stirrer and irradiated with 9 W purple LEDs (approximately 1 cm away from the tube, the optical power up to 210 mw, the mixture temperature ranging from 38 to 45 °C). After stirring for 10 hours, the reaction mixture was washed with water and extracted with ethyl acetate (3 x 15 mL). The combined organic layer was dried over anhydrous Na<sub>2</sub>SO<sub>4</sub>, filtrated and concentrated under vacuum. The desired product was obtained by column chromatography, some of examples were directly filtrated and dried to get the desired racemize (*dl*) products.

## 6.4 Synthesis of allyl sulfone (ethyl 2-((phenylsulfonyl)methyl)acrylate) [1]

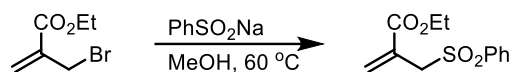

To a solution of ethyl 2-(bromomethyl) acrylate (1.99 g, 10.4 mmol) in dry methanol (25 mL) was added sodium phenylsulfinate (2.50 g, 15.2 mmol). After refluxing at 60 °C for 2.5 hours, the mixture was concentrated under reduced pressure, the obtained residue was dissolved in ethyl acetate and washed with water, brine, dried with Na<sub>2</sub>SO<sub>4</sub>, then purified by column chromatography (PE:EA = 2:1) to give the allyl sulfone as a colourless oil (1.95 g, 74% yield). **<sup>1</sup>H NMR** (400 MHz, CDCl<sub>3</sub>) δ 7.86 (d, *J* = 7.6 Hz, 2H), 7.64 (t, *J* = 7.6 Hz, 1H), 7.54 (t, *J* = 7.6 Hz, 2H), 6.50 (s, 1H), 5.91 (s, 1H), 4.17 (s, 2H), 4.02 (q, *J* = 7.2 Hz, 2H), 1.17 (t, *J* = 7.2 Hz, 3H); **<sup>13</sup>C NMR** (100 MHz, CDCl<sub>3</sub>) δ 164.8, 138.4, 133.9, 133.4, 129.2, 129.1, 128.8, 61.5, 57.5, 14.0. **HRMS** (ESI) *m/z* calcd. for C<sub>12</sub>H<sub>14</sub>NaO<sub>4</sub>S [M+Na]<sup>+</sup>: 277.0506, found: 277.0506.

## 7. Gram-Scale Procedure

### 7.1 Gram-scale procedure for pinacol coupling of aldehydes.

The corresponding aldehyde (15 mmol), *i*-Pr<sub>2</sub>NEt (30 mmol,) were placed into a 100 mL Schlenk-tube with H<sub>2</sub>O (15 mL) and MeCN (45 mL). The reaction mixture was bubbling with nitrogen for 10 minutes, then placed in a stirrer and surrounded by irradiation with pure LEDs for 12 hours. The desired products **1**, **3**, **11**, **20** were obtained by column chromatography in 98%, 98%, 86%, 94% yield.

### 7.2 Gram-scale procedure for pinacol coupling of imines.

The corresponding aldehyde (20 mmol) and excess benzylamine (30 mmol) were directly added in a 100 mL Schlenk-tube with H<sub>2</sub>O (15 mL) and MeCN (45 mL). The reaction mixture was bubbling with nitrogen for 10 minutes, then placed in a stirrer and surrounded by irradiation with pure LEDs for 12 hours. Large amounts of white solid appeared, the reaction mixture was filtrated and washed with *n*-hexane to obtain the racemic diamine **49**, **54**, **55** in 57 %, 55%, 36% yield.

### 7.3 Gram-scale procedure for the reaction of benzaldehyde with allyl sulfone.

The corresponding aldehyde (1.0 equiv, 8 mmol), sulfone (3.0 equiv, 24 mmol), *i*-Pr<sub>2</sub>NEt (2.0 equiv, 16 mmol,) were placed into a 100 mL Schlenk-tube with H<sub>2</sub>O (15 mL) and MeCN (45 mL). The reaction mixture was bubbling with nitrogen for 10 minutes. Then placed in a stirrer and surrounded by irradiation with purple LED for 10 hours. The desired products **37**, **47** were obtained by column chromatography in 85%, 87% yield.

## 8. Characterization Data.

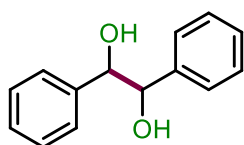

**1,2-Diphenylethane-1,2-diol (1).**<sup>[2]</sup> White solid, 42 mg, 98% yield, *dl* : *meso* = 1.7:1. <sup>1</sup>H NMR (400 MHz, CDCl<sub>3</sub>) δ 7.30-7.28 (m, 6H), 7.24-7.19 (m, 10H), 7.11-7.07 (m, 4H), 4.79 (s, 2H, *meso*), 4.64 (s, 2H, *dl*), 3.21 (s, 2H, *dl*), 2.54 (s, 2H, *meso*). <sup>13</sup>C NMR (100 MHz, CDCl<sub>3</sub>) δ 140.0, 139.8, 128.3, 128.2, 128.1, 128.0, 127.2, 127.1, 79.2, 78.1. HRMS (ESI) *m/z* calcd. for C<sub>14</sub>H<sub>14</sub>NaO<sub>2</sub> [M+Na]<sup>+</sup>: 237.0886, found: 237.0887.

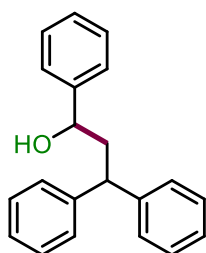

**1,3,3-triphenylpropan-1-ol (1a).**<sup>[3]</sup> Colorless oil, 33% yield. <sup>1</sup>H NMR (400 MHz, CDCl<sub>3</sub>) δ 7.37-7.18 (m, 15H), 4.55-4.51 (m, 1H), 4.17 (dd, *J* = 8.9, 6.8 Hz, 1H), 2.58-2.43 (m, 2H), 1.80 (br, 1H). <sup>13</sup>C NMR (100 MHz, CDCl<sub>3</sub>) δ 144.8, 144.3, 128.8, 128.7, 128.7, 128.2, 128.0, 127.9, 126.5, 126.4, 126.1, 72.6, 47.8, 45.0. HRMS (ESI) *m/z* calcd. for C<sub>21</sub>H<sub>20</sub>NaO [M+Na]<sup>+</sup>: 311.1406, found: 311.1412.

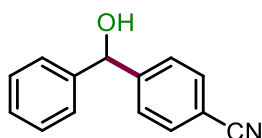

**4-(hydroxy(phenyl)methyl)benzonitrile (1b).**<sup>[4]</sup> White solid, 47 mg, 56% yield. <sup>1</sup>H NMR (400 MHz, CDCl<sub>3</sub>) δ 7.60 (d, *J* = 8.4 Hz, 2H), 7.50 (d, *J* = 8.2 Hz, 2H), 7.40-7.29 (m, 5H), 5.84 (s, 1H), 2.60 (br, 1H). <sup>13</sup>C NMR (100 MHz, CDCl<sub>3</sub>) δ 149.0, 142.9, 132.4, 129.0, 128.4, 127.1, 126.8, 118.9, 111.2, 75.7. **HRMS** (ESI) *m/z* calcd. for C<sub>14</sub>H<sub>11</sub>NNaO [M+Na]<sup>+</sup>: 232.0733, found: 232.0730.

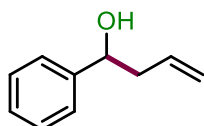

**1-phenylbut-3-en-1-ol (1c).**<sup>[5]</sup> Colourless oil, 34 mg, 57% yield. <sup>1</sup>H NMR (400 MHz, CDCl<sub>3</sub>) δ 7.40-7.31 (m, 4H), 7.29-7.20 (m, 1H), 5.88-5.72 (m, 1H), 5.21-5.09 (m, 2H), 4.73 (t, *J* = 6.3 Hz, 1H), 2.61-2.45 (m, 2H), 2.07 (s, 1H). <sup>13</sup>C NMR (100 MHz, CDCl<sub>3</sub>) δ 144.0, 134.6, 128.6, 127.7, 126.0, 118.6, 73.4, 44.0. **HRMS** (ESI) *m/z* calcd. for C<sub>10</sub>H<sub>12</sub>NaO [M+Na]<sup>+</sup>: 171.0780, found: 171.0782.

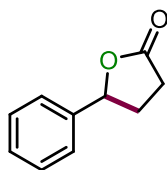

**5-phenyldihydrofuran-2(3H)-one (1d).**<sup>[6]</sup> Light yellow oil, 43 mg, 66% yield. <sup>1</sup>H NMR (400 MHz, CDCl<sub>3</sub>): δ 7.41-7.32 (m, 5H), 5.53-5.49 (m, 1H), 2.69-2.62 (m, 3H), 2.23-2.15 (m, 1H), <sup>13</sup>C NMR (100 MHz, CDCl<sub>3</sub>): δ 177.0, 139.5, 128.9, 128.5, 125.4, 81.3, 31.1, 29.0. **HRMS** (ESI) *m/z* calcd. for C<sub>10</sub>H<sub>10</sub>NaO<sub>2</sub> [M+Na]<sup>+</sup>: 185.0573, found: 185.0579.

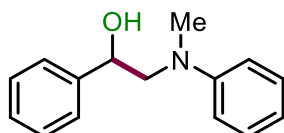

**2-(methyl(phenyl)amino)-1-phenylethan-1-ol(1e).**<sup>[7]</sup> Light brown oil, 40 mg, 44% yield. <sup>1</sup>H NMR (400 MHz, CDCl<sub>3</sub>) δ 7.46-7.34 (m, 4H), 7.33-7.22 (m, 3H), 6.85 (d, *J* = 8.0 Hz, 2H), 6.78 (t, *J* = 7.3 Hz, 1H), 4.99 (dd, *J* = 8.1, 4.1 Hz, 1H), 3.47 (qd, *J* = 14.7, 6.6 Hz, 2H), 2.94 (s, 3H), 2.52 (s, 1H). <sup>13</sup>C NMR (100 MHz, CDCl<sub>3</sub>) δ 150.1, 142.1, 129.4, 128.7, 128.0, 126.0, 117.7, 113.4, 71.9, 62.2, 39.5. **HRMS** (ESI) *m/z* calcd. for C<sub>15</sub>H<sub>17</sub>NNaO [M+Na]<sup>+</sup>: 250.1202, found: 250.1206.

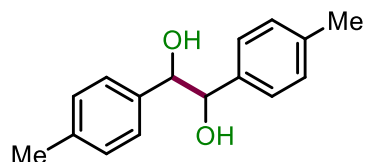

**1,2-Di-*p*-tolylethane-1,2-diol (2).**<sup>[8]</sup> White solid, 46 mg, 95% yield, *dl* : *meso* = 1.5:1. <sup>1</sup>H NMR (400 MHz, CDCl<sub>3</sub>) δ 7.14 (dd, *J* = 13.5, 8.1 Hz, 8H, *dl*), 7.02 (dd, *J* = 14.0, 8.0 Hz, 8H, *meso*), 4.72 (s, 2H, *meso*), 4.63 (s, 2H, *dl*), 2.96 (s, 2H, *dl*), 2.35 (s, 6H, *meso*), 2.31 (s, 6H, *dl*), 2.24 (s, 2H, *meso*). <sup>13</sup>C NMR (100 MHz, CDCl<sub>3</sub>) δ 137.9, 137.6, 137.2, 137.1, 129.1, 128.9, 127.2, 127.0, 78.9, 78.1, 21.3, 21.3. HRMS (ESI) *m/z* calcd. for C<sub>16</sub>H<sub>18</sub>NaO<sub>2</sub> [M+Na]<sup>+</sup>: 265.1199, found: 265.1193.

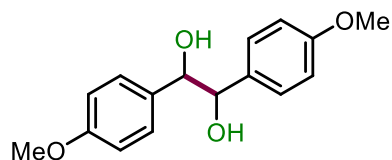

**1,2-Bis(4-methoxyphenyl)ethane-1,2-diol (3).**<sup>[2]</sup> White solid, 53 mg, 97% yield, *dl* : *meso* = 2:1. <sup>1</sup>H NMR (400 MHz, CDCl<sub>3</sub>) δ 7.18 (d, *J* = 8.4 Hz, 4H, *meso*), 7.01 (d, *J* = 8.4 Hz, 4H, *dl*), 6.84 (d, *J* = 8.4 Hz, 4H, *meso*), 6.75 (d, *J* = 8.4 Hz, 4H, *dl*), 4.71 (s, 2H, *meso*), 4.59 (s, 2H, *dl*), 3.79 (s, 6H, *meso*), 3.75 (s, 6H, *dl*), 2.97 (s, 2H, *dl*), 2.24 (s, 2H, *meso*). <sup>13</sup>C NMR (100 MHz, CDCl<sub>3</sub>) δ 159.5, 159.3, 132.2, 132.1, 128.5, 128.3, 113.8, 113.6, 78.9, 77.9, 55.4, 55.3. HRMS (ESI) *m/z* calcd. for C<sub>16</sub>H<sub>18</sub>NaO<sub>4</sub> [M+Na]<sup>+</sup>: 297.1097, found: 297.1091.

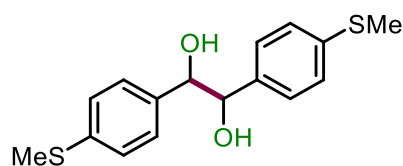

**1,2-Bis(4-(methylthio)phenyl)ethane-1,2-diol (4).** Pale yellow solid, 54 mg, 88% yield, *dl* : *meso* = 1:2.3. <sup>1</sup>H NMR (400 MHz, DMSO-*d*<sub>6</sub>) δ 7.16 (dd, *J* = 15.2, 8.3 Hz, 8H, *dl*), 7.05 (dd, *J* = 13.6, 8.4 Hz, 8H, *meso*), 5.33 (s, 2H, *meso*), 5.20 (s, 2H, *dl*), 4.53 (s, 6H, *meso*), 4.50 (s, 6H, *dl*), 2.44 (s, 2H, *dl*), 2.41 (s, 2H, *meso*). <sup>13</sup>C NMR (100 MHz, DMSO-*d*<sub>6</sub>) δ 140.1, 139.1, 136.0, 135.9, 128.0, 127.9, 125.2, 125.0, 77.0, 76.6, 14.9, 14.8. HRMS (ESI) *m/z* calcd. for C<sub>16</sub>H<sub>18</sub>NaO<sub>2</sub>S<sub>2</sub> [M+Na]<sup>+</sup>: 329.0640, found: 329.0632.

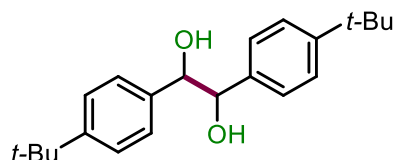

**1,2-Bis(4-(tert-butyl)phenyl)ethane-1,2-diol (5).**<sup>[2]</sup> White solid, 61 mg, 94% yield, *dl* : *meso* = 1:1.5. <sup>1</sup>H NMR (400 MHz, CDCl<sub>3</sub>) δ 7.39 (d, *J* = 8.2 Hz, 4H, *dl*), 7.31 (d, *J* = 8.2 Hz, 4H, *meso*), 7.27 (d, *J* = 8.2 Hz, 4H, *dl*), 7.15 (d, *J* = 8.2 Hz, 4H, *meso*), 4.73 (s, 2H, *meso*), 4.70 (s, 2H, *dl*), 2.74 (s, 2H, *meso*), 2.03 (s, 2H, *dl*), 1.33 (s, 18H, *dl*), 1.30 (s, 18H, *meso*). <sup>13</sup>C NMR (100 MHz, CDCl<sub>3</sub>) δ 151.4, 150.9, 137.5, 137.4, 127.0, 126.6, 125.5, 125.2, 78.3, 78.2, 34.7, 34.6, 31.5, 31.4. HRMS (ESI) *m/z* calcd. for C<sub>22</sub>H<sub>30</sub>NaO<sub>2</sub> [M+Na]<sup>+</sup>: 349.2138, found: 349.2138.

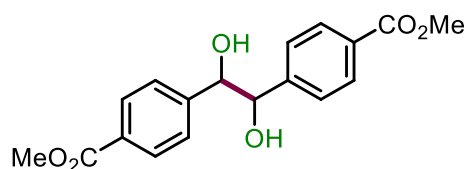

**Dimethyl 4,4'-(1,2-dihydroxyethane-1,2-diyl)dibenzoate (6).**<sup>[2]</sup> White solid, 61 mg, 92% yield, *dl* : *meso* = 1:1. <sup>1</sup>H NMR (400 MHz, DMSO-*d*<sub>6</sub>) δ 7.84 (d, *J* = 8.0 Hz, 4H, *dl*), 7.77 (d, *J* = 8.0 Hz, 4H, *meso*), 7.36 (d, *J* = 8.0 Hz, 4H, *dl*), 7.24 (d, *J* = 8.0 Hz, 4H, *meso*), 5.65 (s, 2H, *meso*), 5.54 (s, 2H, *dl*), 4.76 (s, 2H, *meso*), 4.69 (s, 2H, *dl*), 3.83 (s, 6H, *dl*), 3.81 (s, 6H, *meso*). <sup>13</sup>C NMR (100 MHz, CDCl<sub>3</sub>) δ 166.3, 166.2, 148.5, 147.7, 128.3, 128.2, 128.1, 128.0, 127.6, 127.4, 76.7, 76.5, 52.0, 51.9. HRMS (ESI) *m/z* calcd. for C<sub>18</sub>H<sub>18</sub>NaO<sub>6</sub> [M+Na]<sup>+</sup>: 353.0996, found: 353.0991.

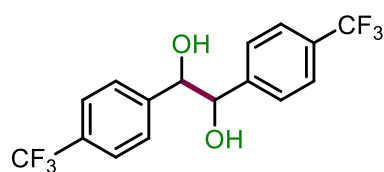

**1,2-Bis(4-(trifluoromethyl)phenyl)ethane-1,2-diol (7).**<sup>[8]</sup> White solid, 68 mg, 97% yield, *dl* : *meso* = 1.2:1. <sup>1</sup>H NMR (400 MHz, CDCl<sub>3</sub>) δ 7.55-7.46 (m, 8H), 7.24 (d, *J* = 8.1 Hz, 4H, *meso*), 7.18 (d, *J* = 8.1 Hz, 4H, *dl*), 4.91 (s, 2H, *meso*), 4.69 (s, 2H, *dl*), 3.19 (s, 2H, *dl*), 2.68 (s, 2H, *meso*). <sup>13</sup>C NMR (100 MHz, CDCl<sub>3</sub>) δ 143.4, 143.3, 130.6 (q, *J* = 32.3 Hz), 130.4 (q, *J* = 32.3 Hz), 127.5, 125.4, 124.1 (q, *J* = 270.4 Hz), 124.1 (q, *J* = 270.4 Hz), 125.34 (q, *J* = 3.8 Hz), 125.18 (q, *J* = 3.8 Hz), 78.5, 77.3. <sup>19</sup>F NMR

(376 MHz, CDCl<sub>3</sub>) δ -62.57, -62.60. **HRMS** (ESI) m/z calcd. for C<sub>16</sub>H<sub>12</sub>F<sub>6</sub>NaO<sub>2</sub> [M+Na]<sup>+</sup>: 373.0634, found: 373.0629.

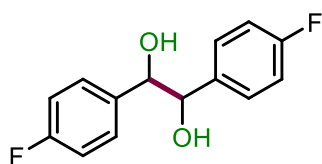

**1,2-Bis(4-fluorophenyl)ethane-1,2-diol (8).**<sup>[2]</sup> White solid, 48 mg, 96% yield, **dl** : **meso** = 1.4:1. **<sup>1</sup>H NMR** (400 MHz, CDCl<sub>3</sub>) δ 7.14 (dd, *J* = 8.5, 5.5 Hz, 4H, *meso*), 7.04 (dd, *J* = 8.5, 5.5 Hz, 4H, *dl*), 7.00-6.95 (m, 4H, *meso*), 6.94-6.88 (m, 4H, *dl*), 4.81 (s, 2H, *meso*), 4.61 (s, 2H, *dl*), 2.97 (s, 2H, *dl*), 2.36 (s, 2H, *meso*). **<sup>13</sup>C NMR** (100 MHz, CDCl<sub>3</sub>) δ 163.8 (d, *J* = 8.2 Hz), 161.4 (d, *J* = 8.3 Hz), 135.5 (d, *J* = 3.1 Hz), 135.3 (d, *J* = 3.2 Hz), 128.8 (d, *J* = 8.0 Hz), 128.7 (d, *J* = 8.1 Hz), 115.3 (d, *J* = 1.2 Hz), 115.1 (d, *J* = 1.2 Hz), 78.9, 77.4. **<sup>19</sup>F NMR** (376 MHz, CDCl<sub>3</sub>) δ -114.00, -114.05. **HRMS** (ESI) m/z calcd. for C<sub>14</sub>H<sub>12</sub>F<sub>2</sub>NaO<sub>2</sub> [M+Na]<sup>+</sup>: 273.0698, found: 273.0695.

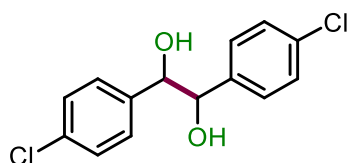

**1,2-Bis(4-chlorophenyl)ethane-1,2-diol (9).**<sup>[2]</sup> White solid, 54 mg, 96% yield, **dl** : **meso** = 1.5:1. **<sup>1</sup>H NMR** (400 MHz, CDCl<sub>3</sub>) δ 7.21 (d, *J* = 6.7 Hz, 4H, *meso*), 7.18 (d, *J* = 6.7 Hz, 4H, *dl*), 7.02 (d, *J* = 6.7 Hz, 4H, *meso*), 6.94 (d, *J* = 6.7 Hz, 4H, *dl*), 4.74 (s, 2H, *meso*), 4.51 (s, 2H, *dl*), 3.27 (s, 2H, *dl*), 2.70 (s, 2H, *meso*). **<sup>13</sup>C NMR** (100 MHz, CDCl<sub>3</sub>) δ 138.0, 137.9, 134.0, 133.9, 128.48, 128.44, 128.40, 78.6, 77.2. **HRMS** (ESI) m/z calcd. for C<sub>14</sub>H<sub>12</sub>Cl<sub>2</sub>NaO<sub>2</sub> [M+Na]<sup>+</sup>: 305.0107, found: 305.0105.

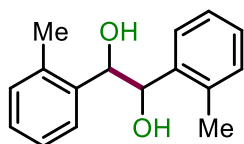

**1,2-Di-o-tolylethane-1,2-diol (10).**<sup>[2]</sup> White solid, 44 mg, 91% yield, **dl** : **meso** = 1.5:1. **<sup>1</sup>H NMR** (400 MHz, CDCl<sub>3</sub>) δ 7.57 (d, *J* = 7.5 Hz, 2H, *dl*), 7.28 (d, *J* = 7.5 Hz, 2H, *meso*), 7.20-7.11 (m, 10H), 7.07 (d, *J* = 7.5 Hz, 2H, *meso*), 6.91 (d, *J* = 7.5 Hz, 2H, *dl*), 5.15 (s, 2H, *meso*), 4.90 (s, 2H, *dl*), 3.34 (s, 2H, *dl*), 2.57 (s, 2H, *meso*), 2.12 (s, 6H, *meso*),

1.63 (s, 6H, *dl*).  $^{13}\text{C}$  NMR (100 MHz,  $\text{CDCl}_3$ )  $\delta$  138.2, 138.1, 136.1, 136.0, 130.2, 130.1, 127.7, 127.3, 126.9, 126.1, 126.0, 74.7, 73.3, 19.2, 18.8. **HRMS** (ESI)  $m/z$  calcd. for  $\text{C}_{16}\text{H}_{18}\text{NaO}_2$   $[\text{M}+\text{Na}]^+$ : 265.1199, found: 265.1197.

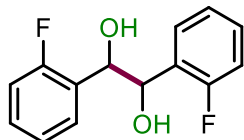

**1,2-Bis(2-fluorophenyl)ethane-1,2-diol (11)**. White solid, 43 mg, 86% yield, *dl* : *meso* = 1.5:1.  $^1\text{H}$  NMR (400 MHz,  $\text{CDCl}_3$ )  $\delta$  7.44-7.42 (m, 2H), 7.24-7.18 (m, 6H), 7.09 (t,  $J = 7.5$  Hz, 2H), 7.02 (t,  $J = 7.5$  Hz, 2H), 6.92-6.87 (m, 4H), 5.34 (s, 2H, *meso*), 5.12 (s, 2H, *dl*), 3.06 (s, 2H, *dl*), 2.83 (s, 2H, *meso*).  $^{13}\text{C}$  NMR (100 MHz,  $\text{CDCl}_3$ )  $\delta$  160.2 (d,  $J = 245.9$  Hz), 160.1 (d,  $J = 245.9$  Hz), 129.7 (d,  $J = 8.4$  Hz), 129.4 (d,  $J = 8.4$  Hz), 128.6 (d,  $J = 4.3$  Hz), 128.4 (d,  $J = 4.3$  Hz), 127.0 (d,  $J = 12.8$  Hz), 126.5 (d,  $J = 12.8$  Hz), 124.2 (d,  $J = 3.4$  Hz), 123.9 (d,  $J = 3.4$  Hz), 115.3 (d,  $J = 22.3$  Hz), 114.9 (d,  $J = 22.3$  Hz), 72.0, 70.6.  $^{19}\text{F}$  NMR (376 MHz,  $\text{CDCl}_3$ )  $\delta$  -118.25, -118.62. **HRMS** (ESI)  $m/z$  calcd. for  $\text{C}_{14}\text{H}_{12}\text{F}_2\text{NaO}_2$   $[\text{M}+\text{Na}]^+$ : 273.0698, found: 273.0697.

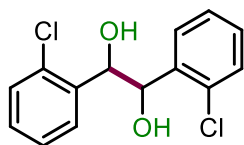

**1,2-Bis(2-chlorophenyl)ethane-1,2-diol (12)**.<sup>[8]</sup> White solid, 52 mg, 92% yield, *dl* : *meso* = 1.1:1.  $^1\text{H}$  NMR (400 MHz,  $\text{CDCl}_3$ )  $\delta$  7.64-7.61 (m, 2H), 7.23-7.12 (m, 14H), 5.56 (s, 2H, *meso*), 5.32 (s, 2H, *dl*), 2.96 (s, 2H, *dl*), 2.91 (s, 2H, *meso*).  $^{13}\text{C}$  NMR (100 MHz,  $\text{CDCl}_3$ )  $\delta$  137.4, 136.5, 133.5, 132.7, 129.6, 129.3, 129.2, 129.0, 128.9, 128.8, 126.9, 126.5, 73.1, 72.2. **HRMS** (ESI)  $m/z$  calcd. for  $\text{C}_{14}\text{H}_{12}\text{Cl}_2\text{NaO}_2$   $[\text{M}+\text{Na}]^+$ : 305.0107, found: 305.0106.

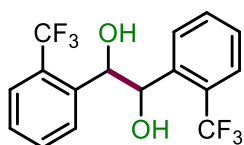

**1,2-Bis(2-(trifluoromethyl)phenyl)ethane-1,2-diol (13)**. White solid, 65 mg, 93% yield, *dl* : *meso* = 1.7:1.  $^1\text{H}$  NMR (400 MHz,  $\text{CDCl}_3$ )  $\delta$  7.90 (d,  $J = 7.8$ , 2H), 7.61-7.55 (m, 10H), 7.49 (t,  $J = 7.8$ , 2H), 7.38 (t,  $J = 7.8$ , 4H), 5.43 (s, 2H, *meso*), 5.36 (s, 2H, *dl*), 3.05 (s, 2H, *dl*), 2.54 (s, 2H, *meso*).  $^{13}\text{C}$  NMR (100 MHz,  $\text{CDCl}_3$ )  $\delta$  138.9, 138.6, 132.2,



131.9, 129.7, 129.1, 128.7 (q,  $J = 30.0$  Hz), 128.4, 128.3, 128.2 (q,  $J = 29.9$  Hz), 125.9 (m), 125.5 (m), 122.9 (q,  $J = 2.6$  Hz), 120.2 (q,  $J = 2.4$  Hz), 72.3, 72.0.  **$^{19}\text{F}$  NMR** (376 MHz,  $\text{CDCl}_3$ )  $\delta$  -57.64, -57.65. **HRMS** (ESI)  $m/z$  calcd. for  $\text{C}_{16}\text{H}_{12}\text{F}_6\text{NaO}_2$   $[\text{M}+\text{Na}]^+$ : 373.0634, found: 373.0628.

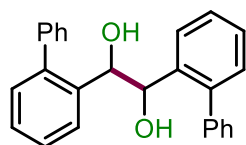

**1,2-Di([1,1'-biphenyl]-2-yl)ethane-1,2-diol (14)**. White solid, 69 mg, 94% yield, ***dl*** : ***meso*** = 1.5:1.  **$^1\text{H}$  NMR** (400 MHz,  $\text{CDCl}_3$ )  $\delta$  7.26-7.24 (m, 16H), 7.20-7.16 (m, 4H), 7.07-6.97 (m, 8H), 6.76 (br, 8H), 4.96 (s, 2H, *meso*), 4.91 (s, 2H, *dl*), 2.78 (br, 2H, *dl*), 2.28 (br, 2H, *meso*).  **$^{13}\text{C}$  NMR** (100 MHz,  $\text{CDCl}_3$ )  $\delta$  142.4, 142.0, 140.9, 140.7, 137.0, 136.7, 129.8, 129.7, 129.3, 129.2, 128.1, 128.0, 127.8, 127.6, 127.5, 127.4 (3C), 127.0, 126.8, 74.5, 73.0. **HRMS** (ESI)  $m/z$  calcd. for  $\text{C}_{26}\text{H}_{22}\text{NaO}_2$   $[\text{M}+\text{Na}]^+$ : 389.1512, found: 389.1503.

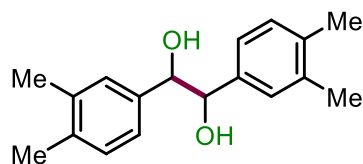

**1,2-Bis(3,4-dimethylphenyl)ethane-1,2-diol (15)**.<sup>[9]</sup> White solid, 51 mg, 94% yield, ***dl*** : ***meso*** = 1.5:1.  **$^1\text{H}$  NMR** (400 MHz,  $\text{CDCl}_3$ )  $\delta$  7.16-7.08 (m, 6H), 7.02-7.01 (m, 4H), 6.87 (d,  $J = 7.7$  Hz, 2H), 4.65 (s, 2H, *meso*), 4.64 (s, 2H, *dl*), 2.83 (br, 2H), 2.27 (s, 12H, *dl*), 2.22 (s, 12H, *meso*).  **$^{13}\text{C}$  NMR** (100 MHz,  $\text{CDCl}_3$ )  $\delta$  137.9, 137.7, 136.8, 136.7, 136.4, 136.1, 129.8, 129.5, 128.5, 128.1, 124.8, 124.5, 78.5, 78.3, 19.9, 19.8, 19.7, 19.6. **HRMS** (ESI)  $m/z$  calcd. for  $\text{C}_{18}\text{H}_{22}\text{NaO}_2$   $[\text{M}+\text{Na}]^+$ : 293.1512, found: 293.1509.

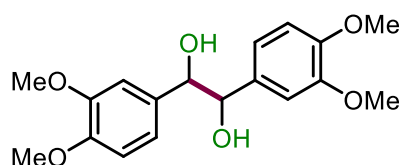

**1,2-Bis(3,4-dimethoxyphenyl)ethane-1,2-diol (16)**.<sup>[10]</sup> White solid, 64 mg, 96% yield, ***dl*** : ***meso*** = 1:1.3.  **$^1\text{H}$  NMR** (400 MHz,  $\text{DMSO}-d_6$ )  $\delta$  6.83-6.74 (m, 8H), 6.63-6.61 (m, 4H), 5.21 (s, 2H, *meso*), 5.04 (s, 2H, *dl*), 4.50 (s, 2H, *dl*), 4.46 (s, 2H, *meso*), 3.71 (s,

6H, *dl*), 3.68 (s, 6H, *meso*), 3.65 (s, 6H, *dl*), 3.58 (s, 6H, *meso*).  $^{13}\text{C NMR}$  (100 MHz, DMSO- $d_6$ )  $\delta$  147.9, 147.8, 147.6, 147.6, 135.8, 134.9, 119.6, 119.4, 111.3, 111.2, 110.9, 110.8, 77.6, 76.8, 55.5, 55.4, 55.3, 55.2. **HRMS** (ESI)  $m/z$  calcd. for  $\text{C}_{18}\text{H}_{22}\text{NaO}_6$   $[\text{M}+\text{Na}]^+$ : 357.1309, found: 357.1300.

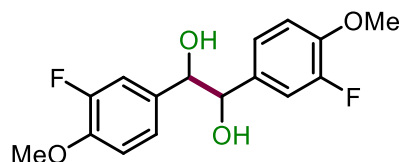

**1,2-Bis(3-fluoro-4-methoxyphenyl)ethane-1,2-diol (17).** White solid, 57 mg, 92% yield, *dl* : *meso* = 4.1:1.  $^1\text{H NMR}$  (400 MHz,  $\text{CDCl}_3$ )  $\delta$  6.99 (d,  $J$  = 12.1 Hz, 2H), 6.92-6.87 (m, 4H), 6.81-6.72 (m, 6H), 4.71 (s, 2H, *meso*), 4.55 (s, 2H, *dl*), 3.87 (s, 6H, *meso*), 3.84 (s, 6H, *dl*), 2.93 (s, 2H, *dl*), 2.30 (s, 2H, *meso*).  $^{13}\text{C NMR}$  (100 MHz,  $\text{CDCl}_3$ )  $\delta$  152.1 (d,  $J$  = 245.9 Hz), 147.3 (d,  $J$  = 10.7 Hz), 132.8 (d,  $J$  = 5.8 Hz), 123.0 (d,  $J$  = 3.5 Hz), 114.7 (d,  $J$  = 18.9 Hz), 112.9 (d,  $J$  = 1.8 Hz), 78.3(2C), 56.3, 56.2.  $^{19}\text{F NMR}$  (376 MHz,  $\text{CDCl}_3$ )  $\delta$  -134.76, -134.87. **HRMS** (ESI)  $m/z$  calcd. for  $\text{C}_{16}\text{H}_{16}\text{F}_2\text{NaO}_4$   $[\text{M}+\text{Na}]^+$ : 333.0909, found: 333.0904.

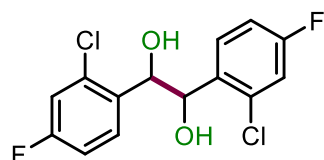

**1,2-Bis(2-chloro-4-fluorophenyl)ethane-1,2-diol(18).** White solid, 57 mg, 90% yield, *dl* : *meso* = 1.5:1.  $^1\text{H NMR}$  (400 MHz,  $\text{CDCl}_3$ )  $\delta$  7.65 (dd,  $J$  = 8.6, 6.2 Hz, 2H), 7.22 (dd,  $J$  = 8.6, 6.2 Hz, 2H), 7.00-6.93 (m, 6H), 6.90-6.86 (m, 2H), 5.53 (s, 2H, *meso*), 5.23 (s, 2H, *dl*), 2.84 (s, 2H, *dl*), 2.73 (s, 2H, *meso*).  $^{13}\text{C NMR}$  (100 MHz,  $\text{CDCl}_3$ )  $\delta$  162.2 (d,  $J$  = 250.4 Hz), 162.0 (d,  $J$  = 250.1 Hz), 133.9 (d,  $J$  = 10.2 Hz), 133.4 (d,  $J$  = 10.3 Hz), 133.2 (d,  $J$  = 3.5 Hz), 132.3 (d,  $J$  = 3.3 Hz), 130.6 (d,  $J$  = 8.9 Hz), 130.1 (d,  $J$  = 8.8 Hz), 116.8 (d,  $J$  = 24.7 Hz), 116.2 (d,  $J$  = 24.7 Hz), 114.4 (d,  $J$  = 21.0 Hz), 114.0 (d,  $J$  = 21.0 Hz), 73.0, 71.5.  $^{19}\text{F NMR}$  (376 MHz,  $\text{CDCl}_3$ )  $\delta$  -111.88, -112.30. **HRMS** (ESI)  $m/z$  calcd. for  $\text{C}_{14}\text{H}_{10}\text{Cl}_2\text{F}_2\text{NaO}_2$   $[\text{M}+\text{Na}]^+$ : 340.9918, found: 340.9911.

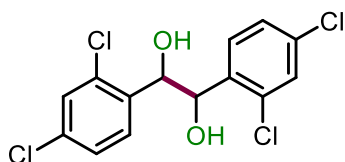

**1,2-Bis(2,4-dichlorophenyl)ethane-1,2-diol (19).** White solid, 58 mg, 83% yield, *dl* : *meso* = 1.1:1.  $^1\text{H NMR}$  (400 MHz,  $\text{CDCl}_3$ )  $\delta$  7.63 (dd,  $J = 7.7, 1.4$  Hz, 2H), 7.29-7.10 (m, 10H), 5.56 (s, 2H, *meso*), 5.32 (s, 2H, *dl*), 2.99 (s, 2H, *dl*), 2.95 (s, 2H, *meso*).  $^{13}\text{C NMR}$  (100 MHz,  $\text{CDCl}_3$ )  $\delta$  135.7, 134.8, 134.6, 134.3, 133.9, 133.3, 130.2, 129.8, 129.3, 128.7, 127.4, 127.0, 72.8, 71.5. **HRMS** (ESI)  $m/z$  calcd. for  $\text{C}_{14}\text{H}_{10}\text{Cl}_4\text{NaO}_2$   $[\text{M}+\text{Na}]^+$ : 372.9327, found: 372.9322.

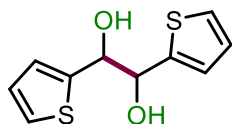

**1,2-Di(thiophen-2-yl)ethane-1,2-diol (20).**<sup>[9]</sup> Colorless oil, 42 mg, 93% yield, *dl* : *meso* = 2.3:1.  $^1\text{H NMR}$  (400 MHz,  $\text{CDCl}_3$ )  $\delta$  7.25-7.21 (m, 4H), 6.95-6.86 (m, 6H), 6.76 (d,  $J = 3.2$  Hz, 2H), 5.07 (s, 2H, *meso*), 4.96 (s, 2H, *dl*), 3.53 (s, 2H, *dl*), 3.00 (s, 2H, *meso*).  $^{13}\text{C NMR}$  (100 MHz,  $\text{CDCl}_3$ )  $\delta$  143.0, 142.5, 126.7, 126.6, 126.1, 125.9, 125.8, 125.4, 74.9, 74.3. **HRMS** (ESI)  $m/z$  calcd. for  $\text{C}_{10}\text{H}_{10}\text{NaO}_2\text{S}_2$   $[\text{M}+\text{Na}]^+$ : 249.0014, found: 249.0013.

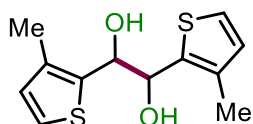

**1,2-Bis(3-methylthiophen-2-yl)ethane-1,2-diol (21).** Colorless oil, 42 mg, 83% yield, *dl* : *meso* = 1.3:1.  $^1\text{H NMR}$  (400 MHz,  $\text{CDCl}_3$ )  $\delta$  7.21 (d,  $J = 4.9$  Hz, 2H, *meso*), 7.14 (d,  $J = 4.9$  Hz, 2H, *dl*), 6.79 (d,  $J = 4.9$  Hz, 2H, *meso*), 6.66 (d,  $J = 4.9$  Hz, 2H, *dl*), 5.19 (s, 2H, *meso*), 5.02 (s, 2H, *dl*), 3.16 (s, 2H, *dl*), 2.44 (s, 2H, *meso*), 2.16 (s, 6H, *meso*), 1.69 (s, 6H, *dl*).  $^{13}\text{C NMR}$  (100 MHz,  $\text{CDCl}_3$ )  $\delta$  136.5, 136.0, 135.8, 135.6, 130.0, 129.6, 124.7, 123.9, 73.9, 72.3, 14.0, 13.1. **HRMS** (ESI)  $m/z$  calcd. for  $\text{C}_{12}\text{H}_{14}\text{NaO}_2\text{S}_2$   $[\text{M}+\text{Na}]^+$ : 277.0327, found: 277.0319.

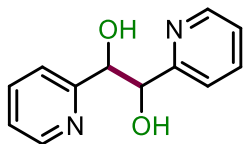

**1,2-Di(pyridin-2-yl)ethane-1,2-diol (22).**<sup>[11]</sup> Pale yellow solid, 29 mg, 67% yield, *dl* : *meso* = 1.1:1. <sup>1</sup>H NMR (400 MHz, CDCl<sub>3</sub>) δ 8.50 (d, *J* = 4.1 Hz, 2H, *dl*), 8.41 (d, *J* = 4.1 Hz, 2H, *meso*), 7.68-7.61 (m, 4H), 7.47-7.42 (m, 4H), 7.20 (dd, *J* = 6.3, 5.6 Hz, 2H), 7.13 (dd, *J* = 6.3, 5.6 Hz, 2H), 5.39 (br, 4H), 5.14 (s, 2H, *meso*), 4.90 (s, 2H, *dl*). <sup>13</sup>C NMR (100 MHz, CDCl<sub>3</sub>) δ 160.7, 160.5, 147.9, 147.8, 137.0, 136.9, 122.7, 122.5, 122.1, 121.5, 75.4, 75.2. HRMS (ESI) *m/z* calcd. for C<sub>12</sub>H<sub>12</sub>N<sub>2</sub>NaO<sub>2</sub> [M+Na]<sup>+</sup>: 239.0791, found: 239.0787.

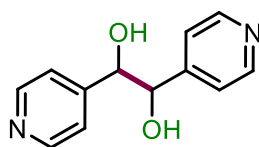

**1,2-Di(pyridin-4-yl)ethane-1,2-diol (23).**<sup>[9]</sup> Pale yellow solid, 36 mg, 83% yield, *dl* : *meso* = 2:1. <sup>1</sup>H NMR (400 MHz, DMSO-*d*<sub>6</sub>) δ 8.44 (d, *J* = 5.6 Hz, 2H, *dl*), 8.40 (d, *J* = 5.6 Hz, 2H, *meso*), 7.23 (d, *J* = 5.6 Hz, 2H, *dl*), 7.19 (d, *J* = 5.6 Hz, 2H, *meso*), 5.68 (s, 4H, *dl* and *meso*), 4.76 (s, 2H, *meso*), 4.62 (s, 2H, *dl*). <sup>13</sup>C NMR (100 MHz, DMSO-*d*<sub>6</sub>) δ 151.2, 150.8, 148.8, 148.6, 122.5, 122.2, 75.3, 75.1. HRMS (ESI) *m/z* calcd. for C<sub>12</sub>H<sub>12</sub>N<sub>2</sub>NaO<sub>2</sub> [M+Na]<sup>+</sup>: 239.0791, found: 239.0786.

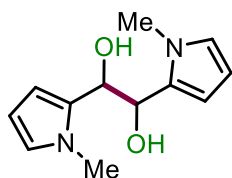

**1,2-Bis(1-methyl-1H-pyrrol-2-yl)ethane-1,2-diol (24).** White solid, 32 mg, 73% yield, *dl* : *meso* = 2.4:1. <sup>1</sup>H NMR (400 MHz, CDCl<sub>3</sub>) δ 6.63 (s, 2 H, *meso*), 6.49 (s, 2 H, *dl*), 6.21-6.13 (m, 4H), 6.03 (s, 2H, *dl*), 4.95 (s, 2H, *meso*), 4.84 (s, 2H, *dl*), 3.60 (s, 6H, *meso*), 3.32 (s, 6H, *dl*), 2.75 (s, 2H, *dl*), 2.16 (s, 2H, *meso*). <sup>13</sup>C NMR (100 MHz, CDCl<sub>3</sub>) δ 131.5, 131.0, 123.8, 123.1, 107.354, 107.4, 107.3, 107.2, 70.4, 69.7, 34.2, 33.8. HRMS (ESI) *m/z* calcd. for C<sub>12</sub>H<sub>16</sub>N<sub>2</sub>NaO<sub>2</sub> [M+Na]<sup>+</sup>: 243.1104, found: 243.1100.

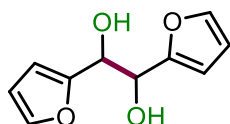

**1,2-Di(furan-2-yl)ethane-1,2-diol (25).**<sup>[9]</sup> White solid, 25 mg, 64% yield, *dl* : *meso* = 1.1:1. **<sup>1</sup>H NMR** (400 MHz, CDCl<sub>3</sub>) δ 7.37 (d, *J* = 13.1 Hz, 4H), 6.33-6.25 (m, 8H), 5.01 (s, 2H, *meso*), 4.99 (s, 2H, *dl*), 3.02 (s, 2H, *dl*), 2.65 (s, 2H, *meso*). **<sup>13</sup>C NMR** (100 MHz, CDCl<sub>3</sub>) δ 152.9, 152.7, 142.6, 142.5, 110.5, 110.4, 108.4, 108.1, 70.2, 70.0. **HRMS** (ESI) *m/z* calcd. for C<sub>10</sub>H<sub>10</sub>NaO<sub>4</sub> [M+Na]<sup>+</sup>: 217.0471, found: 217.0467.

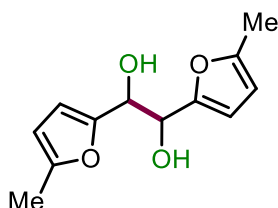

**1,2-Bis(5-methylfuran-2-yl)ethane-1,2-diol (26).**<sup>[2]</sup> White solid, 32 mg, 85% yield, *dl* : *meso* = 1.5:1. **<sup>1</sup>H NMR** (400 MHz, CDCl<sub>3</sub>) δ 6.20 (d, *J* = 2.8 Hz, 2H, *meso*), 6.12 (d, *J* = 2.8 Hz, 2H, *dl*), 5.92 (d, *J* = 2.8 Hz, 2H, *meso*), 5.86 (d, *J* = 2.8 Hz, 2H, *dl*), 4.91 (s, 4H, *dl* and *meso*), 2.89 (s, 2H, *dl*), 2.43 (s, 2H, *meso*), 2.28 (s, 6H, *meso*), 2.25 (s, 6H, *dl*). **<sup>13</sup>C NMR** (100 MHz, CDCl<sub>3</sub>) δ 152.5, 152.2, 151.0, 150.9, 109.6, 108.9, 106.5, 106.3, 70.0, 69.9, 13.7, 13.6. **HRMS** (ESI) *m/z* calcd. for C<sub>12</sub>H<sub>14</sub>NaO<sub>4</sub> [M+Na]<sup>+</sup>: 245.0784, found: 245.0779.

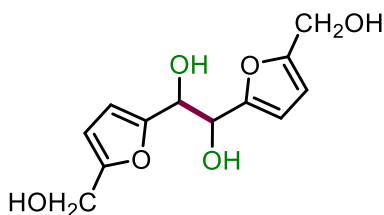

**1,2-Bis(5-(hydroxymethyl)furan-2-yl)ethane-1,2-diol (27).** Pale yellow solid, 44 mg, 87% yield, *dl* primary (the product was obtained without extraction). **<sup>1</sup>H NMR** (400 MHz, DMSO-*d*<sub>6</sub>) δ 6.20 (d, *J* = 7.1 Hz, 4H), 5.34 (s, 2H), 5.15 (s, 2H), 4.66 (s, 2H), 4.37 (d, *J* = 4.5 Hz, 4H) **<sup>13</sup>C NMR** (100 MHz, DMSO-*d*<sub>6</sub>) δ 155.4, 154.0, 107.5, 107.4, 68.9, 55.9. **HRMS** (ESI) *m/z* calcd. for C<sub>12</sub>H<sub>14</sub>NaO<sub>6</sub> [M+Na]<sup>+</sup>: 277.0683, found: 277.0687.

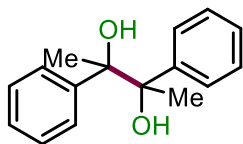

**2,3-Diphenylbutane-2,3-diol (28).**<sup>[2]</sup> White solid, 46 mg, 95% yield, *dl* : *meso* = 1.6:1. <sup>1</sup>H NMR (400 MHz, CDCl<sub>3</sub>) δ 7.24-7.17 (m, 20 H, *dl* and *meso*), 2.66 (s, 2H, *dl*), 2.35 (s, 2H, *meso*), 1.57 (s, 6H, *meso*), 1.49 (s, 6H, *dl*). <sup>13</sup>C NMR (100 MHz, CDCl<sub>3</sub>) δ 143.9, 143.6, 127.5, 127.4, 127.3, 127.2, 127.1, 127.0, 79.0, 78.7, 25.2, 25.0. HRMS (ESI) m/z calcd. for C<sub>16</sub>H<sub>18</sub>NaO<sub>2</sub> [M+Na]<sup>+</sup>: 265.1199, found: 265.1193.

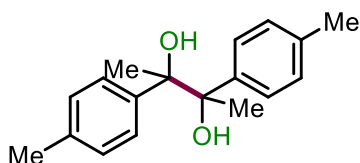

**2,3-Di-*p*-tolylbutane-2,3-diol (29).**<sup>[12]</sup> White solid, 50 mg, 93% yield, *dl* : *meso* = 1.2:1. <sup>1</sup>H NMR (400 MHz, CDCl<sub>3</sub>) δ 7.18-7.06 (m, 16 H, *dl* and *meso*), 2.66 (s, 2H, *dl*), 2.36 (s, 6H, *dl*), 2.34 (s, 6H, *meso*), 2.29 (s, 2H, *meso*), 1.56 (s, 6H, *meso*), 1.48 (s, 6H, *dl*). <sup>13</sup>C NMR (100 MHz, CDCl<sub>3</sub>) δ 141.0, 140.7, 136.6, 136.5, 128.1, 128.0, 127.4, 127.0, 78.9, 78.6, 25.3, 25.1, 21.1, 21.0. HRMS (ESI) m/z calcd. for C<sub>18</sub>H<sub>22</sub>NaO<sub>2</sub> [M+Na]<sup>+</sup>: 293.1512, found: 293.1504.

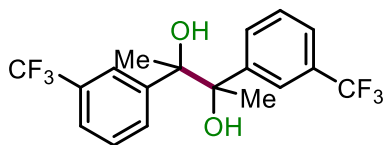

**2,3-Bis(3-(trifluoromethyl)phenyl)butane-2,3-diol (30).** White solid, 66 mg, 87% yield, *dl* : *meso* = 1.5:1. <sup>1</sup>H NMR (400 MHz, CDCl<sub>3</sub>) δ 7.53-7.31 (m, 16 H, *dl* and *meso*), 2.69 (s, 2H, *dl*), 2.52 (s, 2H, *meso*), 1.61 (s, 6H, *meso*), 1.54 (s, 6H, *dl*). <sup>13</sup>C NMR (100 MHz, CDCl<sub>3</sub>) δ 145.9, 145.5, 132.0, 131.6, 131.1 (q, *J* = 32.1 Hz), 129.1, 129.0, 125.6 (q, *J* = 270.6 Hz), 125.5 (q, *J* = 3.8 Hz), 125.3 (q, *J* = 3.8 Hz), 80.0, 79.8, 26.2, 26.0. <sup>19</sup>F NMR (376 MHz, CDCl<sub>3</sub>) δ -62.63, -62.70. HRMS (ESI) m/z calcd. for C<sub>18</sub>H<sub>16</sub>F<sub>6</sub>NaO<sub>2</sub> [M+Na]<sup>+</sup>: 401.0947, found: 401.0938.

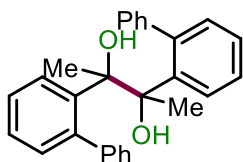

**2,3-Di([1,1'-biphenyl]-2-yl)butane-2,3-diol (31).** White solid, 71 mg, 90% yield, *dl* : *meso* = 1.7:1. <sup>1</sup>H NMR (400 MHz, CDCl<sub>3</sub>) δ 7.64-7.58 (m, 12H), 7.53-7.50 (m, 6H), 7.47-7.43 (m, 8 H), 7.40-7.32 (m, 10H), 2.66 (s, 2H, *dl*), 2.33 (s, 2H, *meso*), 1.66 (s, 6H, *meso*), 1.59 (s, 6H, *dl*). <sup>13</sup>C NMR (100 MHz, CDCl<sub>3</sub>) δ 143.1, 142.7, 140.8, 139.9, 128.9, 128.0, 127.6, 127.4, 127.23, 127.2, 126.1, 126.0, 79.0, 78.8, 25.4, 25.2. HRMS (ESI) m/z calcd. for C<sub>28</sub>H<sub>26</sub>NaO<sub>2</sub> [M+Na]<sup>+</sup>: 417.18 25, found: 417.1825.

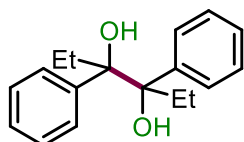

**3,4-Diphenylhexane-3,4-diol (32).**<sup>[2]</sup> White solid, 45 mg, 83% yield, *dl* : *meso* = 1.6:1. <sup>1</sup>H NMR (400 MHz, CDCl<sub>3</sub>) δ 7.24-7.15 (m, 20H, *dl* and *meso*), 2.61 (s, 2H, *dl*), 2.35 (dq, *J* = 14.7, 7.4 Hz, 2H), 2.08 (s, 2H, *meso*), 2.07 (dq, *J* = 14.7, 7.4, Hz, 2H), 1.70 (dq, *J* = 17.4, 7.4 Hz, 2H), 1.59 (dq, *J* = 14.7, 7.4 Hz, 2H), 0.61 (t, *J* = 7.3 Hz, 6H), 0.58 (t, *J* = 7.3 Hz, 6H). <sup>13</sup>C NMR (100 MHz, CDCl<sub>3</sub>) δ 141.5, 140.5, 128.4, 127.8, 127.5, 127.2, 127.0, 126.8, 82.1, 82.0, 28.2, 27.8, 7.8, 7.7. HRMS (ESI) m/z calcd. for C<sub>18</sub>H<sub>22</sub>NaO<sub>2</sub> [M+Na]<sup>+</sup>: 293.1512, found: 293.1504.

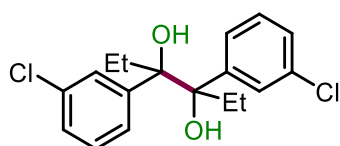

**3,4-Bis(3-chlorophenyl)hexane-3,4-diol (33).** White solid, 55 mg, 81% yield, *dl* : *meso* = 1.2:1. <sup>1</sup>H NMR (400 MHz, CDCl<sub>3</sub>) δ 7.35-7.14 (m, 14 H, *dl* and *meso*), 6.94 (br, 2 H, *dl*), 2.62 (s, 2H, *dl*), 2.29 (dq, *J* = 14.6, 7.4 Hz, 2H), 2.13 (s, 2H, *meso*), 2.07 (dq, *J* = 14.6, 7.4 Hz, 2H), 1.64 (dq, *J* = 14.7, 7.4 Hz, 2H), 1.54 (dq, *J* = 14.7, 7.4 Hz, 2H), 0.62 (t, *J* = 7.1 Hz, 6H), 0.58 (t, *J* = 7.1 Hz, 6H). <sup>13</sup>C NMR (100 MHz, CDCl<sub>3</sub>) δ 143.70, 142.53, 133.81, 133.64, 128.68, 128.6, 128.5, 128.2, 127.3, 127.1, 126.5, 126.0, 81.8, 81.7, 28.3, 27.7, 7.7, 7.5. HRMS (ESI) m/z calcd. for C<sub>18</sub>H<sub>20</sub>Cl<sub>2</sub>NaO<sub>2</sub> [M+Na]<sup>+</sup>: 361.0733, found: 361.0724.

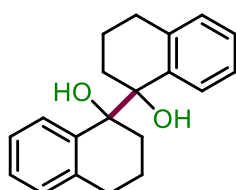

**3,3',4,4'-Tetrahydro-[1,1'-binaphthalene]-1,1'(2H,2'H)-diol (34).** White solid, 48 mg, 82% yield, *dl* : *meso* = 1.8:1.  $^1\text{H NMR}$  (400 MHz,  $\text{CDCl}_3$ )  $\delta$  8.18 (d,  $J = 7.6$  Hz, 2H), 7.25-7.17 (m, 4H), 7.09 (d,  $J = 7.6$  Hz, 2H), 3.18 (s, 2H), 2.72-2.68 (m, 2H), 2.59-2.50 (m, 2H), 1.67-1.58 (m, 6H), 1.30-1.23 (m, 2H).  $^{13}\text{C NMR}$  of (*dl*)-**34** (100 MHz,  $\text{CDCl}_3$ )  $\delta$  140.7, 138.5, 129.2, 129.0, 127.3, 126.5, 77.3, 36.6, 31.3, 20.2.  $^1\text{H NMR}$  of (*meso*)-**34** (400 MHz,  $\text{CDCl}_3$ )  $\delta$  7.17-7.14 (m, 2 H), 7.03-6.94 (m, 6H), 2.64 (s, 2H), 2.61-2.60 (m, 2H), 2.22-2.16 (m, 2H), 2.14-2.04 (m, 2H), 1.70-1.64 (m, 2H), 1.60-1.51 (m, 2H).  $^{13}\text{C NMR}$  of (*meso*)-**34** (100 MHz,  $\text{CDCl}_3$ )  $\delta$  140.2, 139.3, 128.4, 128.3, 127.3, 125.7, 78.3, 35.6, 31.0, 20.5, **HRMS** (ESI)  $m/z$  calcd. for  $\text{C}_{20}\text{H}_{22}\text{NaO}_2$   $[\text{M}+\text{Na}]^+$ : 317.1512, found: 317.1509.

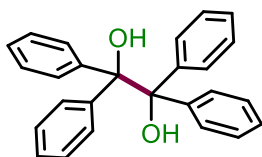

**1,1,2,2-Tetraphenylethane-1,2-diol (35).**<sup>[2]</sup> White solid, 63 mg, 86% yield.  $^1\text{H NMR}$  (400 MHz,  $\text{CDCl}_3$ )  $\delta$  7.30-7.28 (m, 8 H), 7.16-7.15 (m, 12H), 3.02 (s, 2H).  $^{13}\text{C NMR}$  (100 MHz,  $\text{CDCl}_3$ )  $\delta$  144.3, 128.7, 127.4, 127.1, 83.2. **HRMS** (ESI)  $m/z$  calcd. for  $\text{C}_{26}\text{H}_{22}\text{NaO}_2$   $[\text{M}+\text{Na}]^+$ : 389.1512, found: 389.1507.

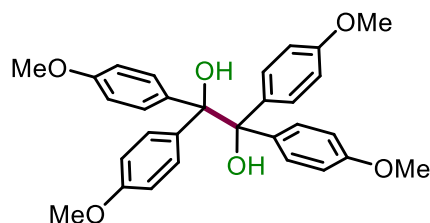

**1,1,2,2-Tetrakis(4-methoxyphenyl)ethane-1,2-diol (36).**<sup>[13]</sup> White solid, 83 mg, 85% yield.  $^1\text{H NMR}$  (400 MHz,  $\text{CDCl}_3$ )  $\delta$  7.18 (d,  $J = 8.8$  Hz, 8 H), 6.68 (d,  $J = 8.8$  Hz, 8 H), 3.76 (s, 2H), 3.73 (s, 12H), 2.93 (s, 2H).  $^{13}\text{C NMR}$  (100 MHz,  $\text{CDCl}_3$ )  $\delta$  160.4, 159.7, 138.2, 137.9, 131.3, 129.2, 115.3, 113.9, 84.2, 76.7, 56.7, 56.6. **HRMS** (ESI)  $m/z$  calcd. for  $\text{C}_{30}\text{H}_{30}\text{NaO}_6$   $[\text{M}+\text{Na}]^+$ : 509.1935, found: 509.1929.

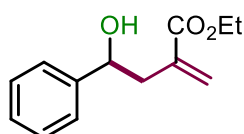

**Ethyl-4-hydroxy-2-methylene-4-phenylbutanoate (37).** Colorless oil, 71 mg, 81%



yield. **<sup>1</sup>H NMR** (400 MHz, CDCl<sub>3</sub>) δ 7.36-7.23 (m, 5H), 6.21 (d, *J* = 0.7 Hz, 1H), 5.57 (d, *J* = 0.7 Hz, 1H), 4.86 (dt, *J* = 8.1, 4.0 Hz, 1H), 4.20 (q, *J* = 7.1 Hz, 2H), 3.05 (d, *J* = 3.0 Hz, 1H), 2.92 (s, 1H), 2.77 (dd, *J* = 14.0, 3.8 Hz, 1H), 2.65 (dd, *J* = 14.0, 8.4 Hz, 1H), 1.30 (t, *J* = 7.1 Hz, 3H). **<sup>13</sup>C NMR** (100 MHz, CDCl<sub>3</sub>) δ 167.8, 144.1, 137.2, 128.4, 128.2, 127.5, 125.8, 73.2, 61.1, 42.5, 14.2. **HRMS** (ESI) *m/z* calcd. for C<sub>13</sub>H<sub>16</sub>NaO<sub>3</sub> [M+Na]<sup>+</sup>: 243.0992, found: 243.0988.

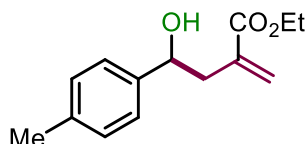

**Ethyl-4-hydroxy-2-methylene-4-(*p*-tolyl)butanoate (38).**<sup>[14]</sup> Colorless oil, 74 mg, 79% yield. **<sup>1</sup>H NMR** (400 MHz, CDCl<sub>3</sub>) δ 7.23 (d, *J* = 7.6 Hz, 2H), 7.13 (d, *J* = 7.6 Hz, 2H), 6.21 (s, 1H), 5.57 (s, 1H), 4.82 (m, 1H), 4.20 (q, *J* = 7.0 Hz, 2H), 2.82 (s, 1H), 2.74 (dd, *J* = 14.0, 3.8 Hz, 1H), 2.65 (dd, *J* = 13.7, 8.4 Hz, 1H), 2.32 (s, 3H), 1.30 (t, *J* = 7.1 Hz, 3H). **<sup>13</sup>C NMR** (100 MHz, CDCl<sub>3</sub>) δ 167.8, 141.1, 137.3, 137.1, 129.1, 128.1, 125.8, 73.0, 61.1, 42.5, 21.2, 14.2. **HRMS** (ESI) *m/z* calcd. for C<sub>14</sub>H<sub>18</sub>NaO<sub>3</sub> [M+Na]<sup>+</sup>: 257.1148, found: 257.1148.

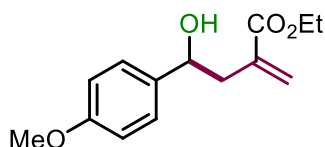

**Ethyl-4-hydroxy-4-(4-methoxyphenyl)-2-methylenebutanoate (39).**<sup>[15]</sup> Colorless oil, 74 mg, 74% yield. **<sup>1</sup>H NMR** (400 MHz, CDCl<sub>3</sub>) δ 7.28 (d, *J* = 8.6 Hz, 2H), 6.87 (d, *J* = 8.5 Hz, 2H), 6.22 (s, 1H), 5.58 (s, 1H), 4.83 (m, 1H), 4.22 (q, *J* = 7.1 Hz, 2H), 3.80 (s, 3H), 2.75 (dd, *J* = 14.0, 3.9 Hz, 1H), 2.67 (dd, *J* = 14.2, 8.3 Hz, 1H), 1.31 (t, *J* = 7.1 Hz, 3H). **<sup>13</sup>C NMR** (100 MHz, CDCl<sub>3</sub>) δ 167.8, 159.1, 137.4, 136.3, 128.1, 127.1, 113.9, 72.9, 61.1, 55.4, 42.6, 14.3. **HRMS** (ESI) *m/z* calcd. for C<sub>14</sub>H<sub>18</sub>NaO<sub>4</sub> [M+Na]<sup>+</sup>: 273.1097, found: 273.1098.

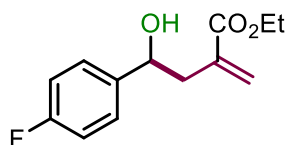

**Ethyl-4-(4-fluorophenyl)-4-hydroxy-2-methylenebutanoate (40).**<sup>[15]</sup> Colorless oil, 73 mg, 77% yield. **<sup>1</sup>H NMR** (400 MHz, CDCl<sub>3</sub>) δ 7.33-7.29 (m, 2H), 7.03-6.98 (m, 2H),

6.22 (d,  $J = 0.7$  Hz 1H), 5.56 (s, 1H), 4.85 (dt,  $J = 8.1, 4.0$  Hz, 1H), 4.21 (q,  $J = 7.1$  Hz, 2H), 3.05 (d,  $J = 3.0$  Hz, 1H), 2.74 (dd,  $J = 14.0, 4.2$  Hz, 1H), 2.63 (dd,  $J = 14.0, 8.2$  Hz, 1H), 1.30 (t,  $J = 7.1$  Hz, 3H).  **$^{13}\text{C}$  NMR** (100 MHz,  $\text{CDCl}_3$ )  $\delta$  167.8, 162.2 (d,  $J = 245.0$  Hz), 139.8 (d,  $J = 245.0$  Hz), 137.0, 128.4, 127.5 (d,  $J = 8.0$  Hz), 115.2 (d,  $J = 21.3$  Hz), 72.6, 61.2, 42.7, 14.2.  **$^{19}\text{F}$  NMR** (376 MHz,  $\text{CDCl}_3$ )  $\delta$  -115.36. **HRMS** (ESI)  $m/z$  calcd. for  $\text{C}_{13}\text{H}_{15}\text{FNaO}_3$   $[\text{M}+\text{Na}]^+$ : 261.0897, found: 261.0895.

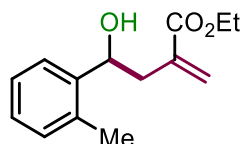

**Ethyl-4-hydroxy-2-methylene-4-(o-tolyl)butanoate (41).** Colorless oil, 71 mg, 76% yield.  **$^1\text{H}$  NMR** (400 MHz,  $\text{CDCl}_3$ )  $\delta$  7.50 (d,  $J = 7.6$  Hz, 1H), 7.21-7.11 (m, 3H), 6.26 (s, 1H), 5.64 (s, 1H), 5.08 (dt,  $J = 5.8, 3.0$  Hz, 1H), 4.22 (q,  $J = 6.9$  Hz, 2H), 2.75 (dd,  $J = 14.0, 2.9$  Hz, 1H), 2.67 (d,  $J = 2.8$  Hz, 1H), 2.54 (dd,  $J = 14.0, 9.0$  Hz, 1H), 2.36 (s, 3H) 1.31 (t,  $J = 7.1$  Hz, 3H).  **$^{13}\text{C}$  NMR** (100 MHz,  $\text{CDCl}_3$ )  $\delta$  167.7, 142.3, 134.4, 130.4, 128.4, 127.3, 126.3, 125.1, 69.4, 61.1, 41.5, 19.1, 14.3. **HRMS** (ESI)  $m/z$  calcd. for  $\text{C}_{14}\text{H}_{18}\text{NaO}_3$   $[\text{M}+\text{Na}]^+$ : 257.1148, found: 257.1148.

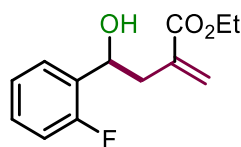

**Ethyl-4-(2-fluorophenyl)-4-hydroxy-2-methylenebutanoate (42).** Colorless oil, 78 mg, 82% yield.  **$^1\text{H}$  NMR** (400 MHz,  $\text{CDCl}_3$ )  $\delta$  7.47 (t,  $J = 7.5$  Hz, 1H), 7.24-7.19 (m, 1H), 7.14-7.10 (m, 1H), 7.01-6.97 (m, 1H), 6.20 (s, 1H), 5.55 (s, 1H), 5.18 (m, 1H), 4.21 (q,  $J = 7.0$  Hz, 2H), 3.34 (d,  $J = 4.0$  Hz, 1H), 2.80 (dd,  $J = 14.0, 4.2$  Hz, 1H), 2.74 (dd,  $J = 14.0, 7.9$  Hz, 1H), 1.30 (t,  $J = 7.1$  Hz, 3H).  **$^{13}\text{C}$  NMR** (100 MHz,  $\text{CDCl}_3$ )  $\delta$  168.1, 159.73 (d,  $J = 245.3$  Hz), 137.0, 131.0 (d,  $J = 13.2$  Hz), 128.8 (d,  $J = 8.2$  Hz), 128.4, 127.4 (d,  $J = 4.6$  Hz), 124.2 (d,  $J = 3.4$  Hz), 115.1 (d,  $J = 21.7$  Hz), 67.7, 67.6, 61.3, 41.1, 14.2.  **$^{19}\text{F}$  NMR** (376 MHz,  $\text{CDCl}_3$ )  $\delta$  -119.21. **HRMS** (ESI)  $m/z$  calcd. for  $\text{C}_{13}\text{H}_{15}\text{FNaO}_3$   $[\text{M}+\text{Na}]^+$ : 261.0897, found: 261.0899.

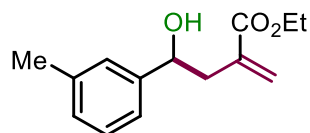

**Ethyl-4-hydroxy-2-methylene-4-(m-tolyl)butanoate (43).** Colorless oil, 71 mg, 76% yield.  $^1\text{H NMR}$  (400 MHz,  $\text{CDCl}_3$ )  $\delta$  7.25-7.13 (m, 3H), 7.07 (d,  $J = 7.3$  Hz, 1H), 6.23 (s, 1H), 5.6 (s, 1H), 4.83 (m, 1H), 4.21 (q,  $J = 7.1$  Hz, 2H), 2.77 (dd,  $J = 13.8, 3.8$  Hz, 1H), 2.65 (dd,  $J = 14.0, 8.6$  Hz, 1H), 2.34 (s, 3H), 1.31 (t,  $J = 7.1$  Hz, 3H).  $^{13}\text{C NMR}$  (100 MHz,  $\text{CDCl}_3$ )  $\delta$  167.8, 144.1, 138.1, 137.4, 128.4, 128.3, 128.1, 126.5, 122.9, 73.2, 61.1, 42.6, 21.5, 14.3. **HRMS** (ESI)  $m/z$  calcd. for  $\text{C}_{14}\text{H}_{18}\text{NaO}_3$   $[\text{M}+\text{Na}]^+$ : 257.1148, found: 257.1147.

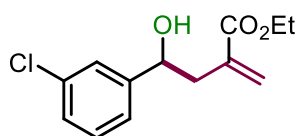

**Ethyl-4-(3-chlorophenyl)-4-hydroxy-2-methylenebutanoate (44).** Colorless oil, 75 mg, 74% yield.  $^1\text{H NMR}$  (400 MHz,  $\text{CDCl}_3$ )  $\delta$  7.37 (s, 1H), 7.27-7.21 (m, 3H), 6.24 (s, 1H), 5.59 (s, 1H), 4.85 (m, 1H), 4.22 (q,  $J = 7.1$  Hz, 2H), 3.06 (d,  $J = 3.4$  Hz, 1H), 2.77 (dd,  $J = 14.0, 3.8$  Hz, 1H), 2.62 (dd,  $J = 14.0, 8.4$  Hz, 1H), 1.32 (t,  $J = 7.1$  Hz, 3H).  $^{13}\text{C NMR}$  (100 MHz,  $\text{CDCl}_3$ )  $\delta$  167.9, 146.2, 136.9, 134.4, 129.7, 128.6, 127.6, 126.0, 124.0, 72.7, 61.3, 42.7, 14.3. **HRMS** (ESI)  $m/z$  calcd. for  $\text{C}_{13}\text{H}_{15}\text{ClNaO}_3$   $[\text{M}+\text{Na}]^+$ : 277.0602, found: 277.0599.

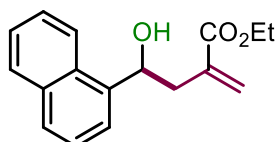

**Ethyl-4-hydroxy-2-methylene-4-(naphthalen-1-yl)butanoate (45).**<sup>[14]</sup> Colorless oil, 82 mg, 76% yield.  $^1\text{H NMR}$  (400 MHz,  $\text{CDCl}_3$ )  $\delta$  7.82 (d,  $J = 8.4$  Hz, 4H), 7.50-7.46 (m, 3H), 6.24 (s, 1H), 5.60 (s, 1H), 5.05 (m, 1H), 4.22 (q,  $J = 7.1$  Hz, 2H), 3.04 (d,  $J = 3.2$  Hz, 1H), 2.88 (dd,  $J = 14.0, 4.0$  Hz, 1H), 2.75 (dd,  $J = 14.0, 8.4$  Hz, 1H), 1.31 (t,  $J = 7.1$  Hz, 3H).  $^{13}\text{C NMR}$  (100 MHz,  $\text{CDCl}_3$ )  $\delta$  167.9, 141.5, 137.2, 133.4, 133.0, 128.3, 128.2, 128.1, 127.8, 126.2, 125.9, 124.5, 124.1, 73.3, 61.2, 42.5, 14.2. **HRMS** (ESI)  $m/z$  calcd. for  $\text{C}_{17}\text{H}_{18}\text{NaO}_3$   $[\text{M}+\text{Na}]^+$ : 293.1148, found: 293.1149.

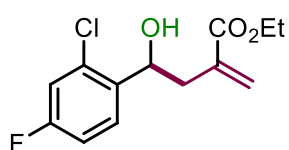

**Ethyl-4-(2-chloro-4-fluorophenyl)-4-hydroxy-2-methylenebutanoate (46).**

Colorless oil, 78 mg, 72% yield.  $^1\text{H NMR}$  (400 MHz,  $\text{CDCl}_3$ )  $\delta$  7.56-7.52 (m, 1H), 7.06-6.95 (m, 2H), 6.22 (s, 1H), 5.58 (s, 1H), 5.19 (m, 1H), 4.22 (q,  $J = 7.1$  Hz, 2H), 3.63 (s, 1H), 2.79 (dd,  $J = 14.1, 3.2$  Hz, 1H), 2.61 (dd,  $J = 14.1, 8.6$  Hz, 1H), 1.30 (t,  $J = 7.1$  Hz, 3H).  $^{13}\text{C NMR}$  (100 MHz,  $\text{CDCl}_3$ )  $\delta$  168.5, 161.6 (d,  $J = 248.7$  Hz), 137.4 (d,  $J = 3.4$  Hz), 137.0, 132.2 (d,  $J = 10.2$  Hz), 128.8, 128.6 (d,  $J = 8.7$  Hz), 116.6 (d,  $J = 24.7$  Hz), 114.2 (d,  $J = 20.8$  Hz), 69.8, 61.5, 40.7, 14.2.  $^{19}\text{F NMR}$  (376 MHz,  $\text{CDCl}_3$ )  $\delta$  -113.69. **HRMS** (ESI)  $m/z$  calcd. for  $\text{C}_{13}\text{H}_{14}\text{ClFNaO}_3$   $[\text{M}+\text{Na}]^+$ : 295.0508, found: 295.0507.

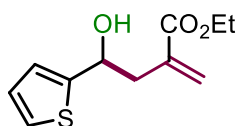

**Ethyl-4-hydroxy-2-methylene-4-(thiophen-2-yl)butanoate (47).**<sup>[14]</sup> Colorless oil, 78 mg, 86% yield.  $^1\text{H NMR}$  (400 MHz,  $\text{CDCl}_3$ )  $\delta$  7.23-7.21 (m, 1H), 6.95-9.94 (m, 2H), 6.25 (s, 1H), 5.63 (s, 1H), 5.13 (dt,  $J = 8.2, 4.1$  Hz, 1H), 4.22 (q,  $J = 7.1$  Hz, 2H), 3.07 (d,  $J = 4.0$  Hz, 1H), 2.87 (dd,  $J = 14.0, 4.6$  Hz, 1H), 2.79 (dd,  $J = 14.0, 8.2$  Hz, 1H), 1.30 (t,  $J = 7.2$  Hz, 3H).  $^{13}\text{C NMR}$  (100 MHz,  $\text{CDCl}_3$ )  $\delta$  167.7, 148.1, 136.7, 128.6, 126.7, 124.5, 123.6, 69.3, 61.2, 42.6, 14.2. **HRMS** (ESI)  $m/z$  calcd. for  $\text{C}_{11}\text{H}_{14}\text{NaO}_3\text{S}$   $[\text{M}+\text{Na}]^+$ : 249.0556, found: 249.0557.

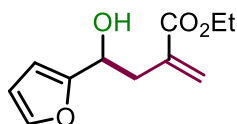

**Ethyl-4-(furan-2-yl)-4-hydroxy-2-methylenebutanoate (48).**<sup>[14]</sup> Colorless oil, 61 mg, 73% yield.  $^1\text{H NMR}$  (400 MHz,  $\text{CDCl}_3$ )  $\delta$  7.37 (m, 1H), 6.32-6.31 (m, 1H), 6.25 (m, 2H), 5.64 (s, 1H), 4.90 (dt,  $J = 8.4, 5.0$  Hz, 1H), 4.22 (q,  $J = 7.1$  Hz, 2H), 2.90 (dd,  $J = 14.1, 4.9$  Hz, 1H), 2.82 (dd,  $J = 14.0, 8.0$  Hz, 1H), 2.77 (d,  $J = 5.0$  Hz, 1H), 1.31 (t,  $J = 7.1$  Hz, 3H).  $^{13}\text{C NMR}$  (100 MHz,  $\text{CDCl}_3$ )  $\delta$  167.7, 156.1, 142.0, 136.7, 128.4, 110.2, 106.2, 67.1, 61.2, 38.9, 14.3. **HRMS** (ESI)  $m/z$  calcd. for  $\text{C}_{11}\text{H}_{14}\text{NaO}_4$   $[\text{M}+\text{Na}]^+$ : 233.0784, found: 233.0782.

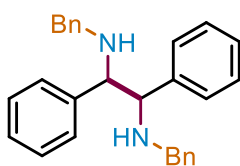

**N,N-dibenzyl-1,2-diphenylethane-1,2-diamine (49).**<sup>[2]</sup> White solid, 70 mg, 89% yield,

**dl : meso** = 1.6:1. **<sup>1</sup>H NMR** (400 MHz, CDCl<sub>3</sub>) δ 7.34-7.12(m, 32H), 7.04 (dd, *J* = 7.7, 1.8 Hz, 4H, *meso*), 6.97-6.96 (m, 4H, *dl*), 3.75 (s, 2H, *dl*), 3.71 (s, 2H, *meso*), 3.66 (d, *J* = 13.3 Hz, 2H, *meso*), 3.53 (d, *J* = 13.7 Hz, 2H, *dl*), 3.49 (d, *J* = 13.3 Hz, 2H, *meso*), 3.30 (d, *J* = 13.7 Hz, *dl*), 1.92 (br, 4H). **<sup>13</sup>C NMR** (100 MHz, CDCl<sub>3</sub>) δ 141.3, 141.0, 140.8, 140.5, 128.7, 128.5, 128.4, 128.3, 128.2, 128.11, 128.10, 128.0, 127.8, 127.0, 126.9, 126.8, 68.5, 67.3, 51.5, 51.1. **HRMS** (ESI) *m/z* calcd. for C<sub>28</sub>H<sub>28</sub>N<sub>2</sub>Na [M+Na]<sup>+</sup>: 415.2145, found: 415.2140.

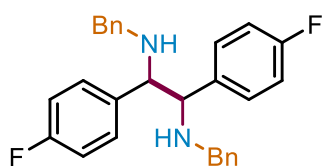

**N,N-dibenzyl-1,2-bis(4-fluorophenyl)ethane-1,2-diamine (50).**<sup>[2]</sup> White solid, 65 mg, 76% yield, **dl : meso** = 1.5:1. **<sup>1</sup>H NMR** (400 MHz, CDCl<sub>3</sub>) δ 7.33-7.17 (m, 20H), 7.01-6.94 (m, 12H), 6.86-6.82(m, 4H), 3.70 (s, 2H, *dl*), 3.64(d, *J* = 13.3 Hz, 2H, *meso*), 3.63 (s, 2H, *meso*), 3.54 (d, *J* = 13.6 Hz, 2H, *dl*), 3.47 (d, *J* = 13.3 Hz, 2H, *meso*), 3.29 (d, *J* = 13.6 Hz, 2H, *dl*), 1.89 (br, 4H). **<sup>13</sup>C NMR** (100 MHz, CDCl<sub>3</sub>) δ 162.5 (d, *J* = 245.6 Hz), 162.0 (d, *J* = 245.0 Hz), 140.5, 140.2, 136.8 (d, *J* = 2.9 Hz), 136.3 (d, *J* = 3.0 Hz), 130.1 (d, *J* = 7.9 Hz), 129.5 (d, *J* = 8.0 Hz), 128.5, 128.4, 128.2, 128.0, 127.1, 127.0, 115.3 (d, *J* = 21.2 Hz), 115.0 (d, *J* = 21.2 Hz), 67.9, 66.5, 51.4, 51.1. **<sup>19</sup>F NMR** (376 MHz, CDCl<sub>3</sub>) δ -114.89, -115.62. **HRMS** (ESI) *m/z* calcd. for C<sub>28</sub>H<sub>26</sub>F<sub>2</sub>N<sub>2</sub>Na [M+Na]<sup>+</sup>: 451.1956, found: 451.1955.

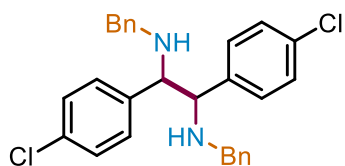

**N,N-Dibenzyl-1,2-bis(4-chlorophenyl)ethane-1,2-diamine (51).**<sup>[16]</sup> White solid, 65 mg, 71% yield, **dl : meso** = 1.8:1. **<sup>1</sup>H NMR** (400 MHz, CDCl<sub>3</sub>) δ 7.31-7.13 (m, 28H), 7.01 (d, *J* = 6.7 Hz, 4H), 6.95 (d, *J* = 8.3 Hz, 4H), 3.71 (s, 2H, *dl*), 3.65 (d, *J* = 13.3 Hz, 2H, *meso*), 3.63 (s, 2H, *meso*), 3.54 (d, *J* = 13.6 Hz, 2H, *dl*), 3.46 (d, *J* = 13.3 Hz, 2H, *meso*), 3.30 (d, *J* = 13.6 Hz, 2H, *dl*), 1.87 (br, 4H). **<sup>13</sup>C NMR** (100 MHz, CDCl<sub>3</sub>) δ 140.2, 140.0, 139.5, 139.0, 133.4, 132.9, 130.0, 129.4, 128.6, 128.5, 128.4, 128.2, 128.0, 127.1, 127.0, 67.7, 66.4, 51.3, 51.1. **HRMS** (ESI) *m/z* calcd. for C<sub>28</sub>H<sub>26</sub>Cl<sub>2</sub>N<sub>2</sub>Na [M+Na]<sup>+</sup>:

483.1365, found: 483.1360.

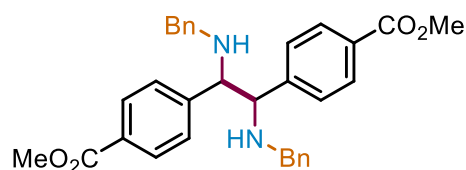

**Dimethyl 4,4'-(1,2-bis(benzylamino)ethane-1,2-diyl)dibenzoate (52).**<sup>[17]</sup> White solid, 85 mg, 84% yield, *dl* : *meso* = 1.2:1. <sup>1</sup>H NMR (400 MHz, CDCl<sub>3</sub>) δ 7.96 (d, *J* = 8.2 Hz, 4H, *dl*), 7.82 (d, *J* = 8.2 Hz, 4H, *meso*), 7.28-7.19 (m, 20H), 7.09 (d, *J* = 8.1 Hz, 4H, *dl*), 7.01 (d, *J* = 6.6 Hz, 4H, *meso*), 3.90 (s, 6H, *dl*), 3.87 (s, 2H, *dl*), 3.85 (s, 6H, *meso*), 3.76 (s, 2H, *meso*), 3.63 (d, *J* = 13.2 Hz, 2H, *meso*), 3.56 (d, *J* = 13.6 Hz, 2H, *dl*), 3.47 (d, *J* = 13.2 Hz, 2H, *meso*), 3.32 (d, *J* = 13.6 Hz, 2H, *dl*), 2.10 (br, 4H). <sup>13</sup>C NMR (100 MHz, CDCl<sub>3</sub>) δ 167.0, 166.9, 146.4, 145.9, 140.1, 139.9, 129.6, 129.5, 128.6, 128.5, 128.4, 128.1, 128.0, 127.9, 127.1, 127.0, 68.1, 66.7, 52.1, 52.0, 51.4, 51.1. **HRMS** (ESI) *m/z* calcd. for C<sub>32</sub>H<sub>32</sub>N<sub>2</sub>NaO<sub>4</sub> [M+Na]<sup>+</sup>: 531.2254, found: 531.2250.

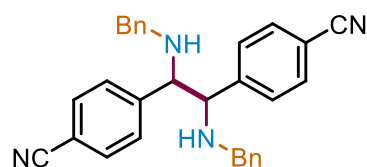

**4,4'-(1,2-bis(benzylamino)ethane-1,2-diyl)dibenzonitrile (53).**<sup>[2]</sup> White solid, 80mg, 90% yield, *dl* : *meso* = 1.2:1. <sup>1</sup>H NMR (400 MHz, CDCl<sub>3</sub>) δ 7.56 (d, *J* = 6.7 Hz, 4H, *dl*), 7.47 (d, *J* = 6.7 Hz, 4H, *meso*), 7.31-7.19 (m, 20H), 7.13 (d, *J* = 6.7 Hz, 4H, *dl*), 7.05 (d, *J* = 8.3 Hz, 4H, *meso*), 3.88 (s, 2H, *dl*), 3.72 (s, 2H, *meso*), 3.64 (d, *J* = 13.3 Hz, 2H, *meso*), 3.59 (d, *J* = 13.6 Hz, 2H, *dl*), 3.47 (d, *J* = 13.3 Hz, 2H, *meso*), 3.35 (d, *J* = 13.6 Hz, 2H, *dl*). <sup>13</sup>C NMR (100 MHz, CDCl<sub>3</sub>) δ 146.5, 145.7, 139.6, 139.5, 132.1, 129.3, 128.7, 128.6, 128.1, 128.0, 127.3, 118.8, 118.7, 111.7, 111.4, 67.9, 66.4, 51.4, 51.2. **HRMS** (ESI) *m/z* calcd. for C<sub>30</sub>H<sub>26</sub>N<sub>4</sub>Na [M+Na]<sup>+</sup>: 465.2050, found: 465.2050.

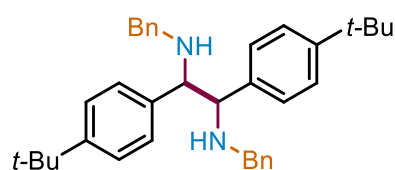

**N,N-Dibenzyl-1,2-bis(4-(tert-butyl)phenyl)ethane-1,2-diamine (54).** White solid obtained by filtration, 61 mg, 61% yield, *dl* primary. <sup>1</sup>H - NMR (400 MHz, CDCl<sub>3</sub>) δ

7.35-7.16 (m, 14H), 6.93-6.91 (m, 4H), 3.66 (s, 2H), 3.52 (d,  $J = 13.9$  Hz, 2H), 3.28 (d,  $J = 13.9$  Hz, 2H), 1.72 (br, 2H), 1.35 (s, 18H).  $^{13}\text{C}$  NMR (100 MHz,  $\text{CDCl}_3$ )  $\delta$  150.6, 140.7, 138.1, 128.3, 128.2, 127.9, 126.7, 125.4, 67.1, 51.0, 34.7, 31.6. HRMS (ESI)  $m/z$  calcd. for  $\text{C}_{36}\text{H}_{44}\text{N}_2\text{Na}$   $[\text{M}+\text{Na}]^+$ : 527.3397, found: 527.3388.

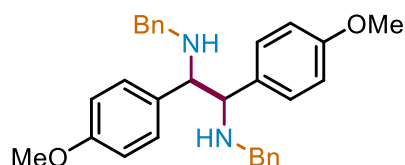

**N,N-Dibenzyl-1,2-bis(4-methoxyphenyl)ethane-1,2-diamine (55).**<sup>[2]</sup> White solid obtained by filtration, 40 mg, 44% yield, *dl* primary.  $^1\text{H}$  NMR (400 MHz,  $\text{CDCl}_3$ )  $\delta$  7.24-7.16 (m, 10H), 6.97 (d,  $J = 6.7$  Hz, 4H), 6.87 (d,  $J = 8.6$  Hz, 4H), 3.82 (s, 6H), 3.65 (s, 2H), 3.52 (d,  $J = 13.8$  Hz, 2H), 3.27 (d,  $J = 13.8$  Hz, 2H), 1.68 (br, 2H).  $^{13}\text{C}$  NMR (100 MHz,  $\text{CDCl}_3$ )  $\delta$  159.2, 140.5, 132.9, 129.7, 128.3, 128.0, 126.8, 113.9, 66.7, 55.4, 51.0. HRMS (ESI)  $m/z$  calcd. for  $\text{C}_{30}\text{H}_{32}\text{N}_2\text{NaO}_2$   $[\text{M}+\text{Na}]^+$ : 475.2356, found: 475.2350.

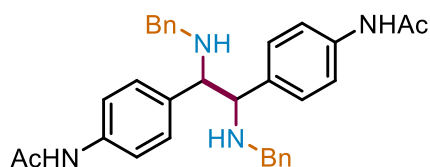

**N,N'-((1,2-Bis(benzylamino)ethane-1,2-diyl)bis(4,1-phenylene))diacetamide (56).**<sup>[2]</sup> White solid obtained by filtration, 67 mg, 66% yield, *dl* primary.  $^1\text{H}$  NMR (400 MHz,  $\text{DMSO-}d_6$ )  $\delta$  9.87 (s, 2H), 7.47 (d,  $J = 6.7$  Hz, 4H), 7.24-7.06 (m, 14H), 3.67 (s, 2H), 3.47 (d,  $J = 13.6$  Hz, 2H), 3.28 (d,  $J = 13.6$  Hz, 2H), 2.15 (br, 2H), 2.03 (s, 6H).  $^{13}\text{C}$  NMR (100 MHz,  $\text{DMSO-}d_6$ )  $\delta$  168.1, 140.6, 138.1, 135.7, 128.4, 128.0, 127.6, 126.5, 118.4, 66.1, 50.3, 24.0. HRMS (ESI)  $m/z$  calcd. for  $\text{C}_{32}\text{H}_{34}\text{N}_4\text{NaO}_2$   $[\text{M}+\text{Na}]^+$ : 529.2574, found: 529.2568.

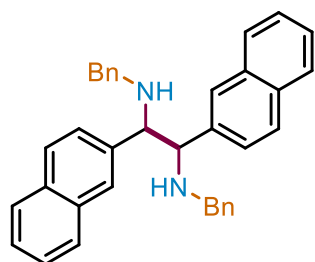

**N,N-Dibenzyl-1,2-di(naphthalen-2-yl)ethane-1,2-diamine (57).**<sup>[2]</sup> White solid

obtained by filtration, 80 mg, 81% yield, *dl* primary.  $^1\text{H NMR}$  (400 MHz,  $\text{CDCl}_3$ )  $\delta$  7.90-7.81 (m, 8H), 7.55-7.51 (m, 6H), 7.17-7.15 (m, 6H), 6.90 (d,  $J = 3.2$  Hz, 4H), 4.02 (s, 2H), 3.54 (d,  $J = 13.8$  Hz, 2H), 3.30 (d,  $J = 13.8$  Hz, 2H).  $^{13}\text{C NMR}$  (100 MHz,  $\text{CDCl}_3$ )  $\delta$  140.2, 138.5, 133.5, 133.4, 128.6, 128.5, 128.3, 128.1, 128.0, 127.9, 126.8, 126.2, 126.1, 126.0, 67.1, 51.0. **HRMS** (ESI)  $m/z$  calcd. for  $\text{C}_{36}\text{H}_{32}\text{N}_2\text{Na}$   $[\text{M}+\text{Na}]^+$ : 515.2458, found: 515.2449.

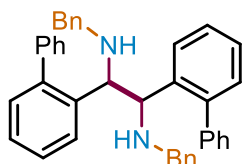

**1,2-Di([1,1'-biphenyl]-2-yl)-N,N-dibenzylethane-1,2-diamine (58)**. White solid, 81 mg, 74% yield, *dl* : *meso* = 1.4:1.  $^1\text{H NMR}$  (400 MHz,  $\text{CDCl}_3$ )  $\delta$  7.38-7.00 (m, 52H), 6.75-6.45 (br, 4H), 4.16 (s, 2H, *dl*), 4.16 (s, 2H, *meso*), 3.70 (d,  $J = 13.0$  Hz, 2H, *meso*), 3.66 (d,  $J = 13.0$  Hz, 2H, *meso*), 3.57 (d,  $J = 13.7$  Hz, 2H, *dl*), 3.38 (d,  $J = 13.7$  Hz, 2H, *dl*), 2.24 (br, 4H).  $^{13}\text{C NMR}$  (100 MHz,  $\text{CDCl}_3$ )  $\delta$  143.7, 143.2, 141.4, 141.3, 141.1, 138.9, 138.1, 129.8, 129.7, 129.4, 128.4, 128.3, 128.1, 128.0, 127.9, 127.8, 127.5, 127.2, 126.8, 126.7, 126.6, 126.5, 126.5, 126.3, 63.7, 60.7, 51.4, 50.9. **HRMS** (ESI)  $m/z$  calcd. for  $\text{C}_{40}\text{H}_{36}\text{N}_2\text{Na}$   $[\text{M}+\text{Na}]^+$ : 567.2771, found: 567.2764.

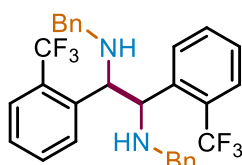

**N,N-Dibenzyl-1,2-bis(2-(trifluoromethyl)phenyl)ethane-1,2-diamine (59)**. White solid, 75 mg, 71% yield, *dl* : *meso* = 1:1.2.  $^1\text{H NMR}$  (400 MHz,  $\text{CDCl}_3$ )  $\delta$  7.98 (d,  $J = 7.8$  Hz, 2H), 7.73 (d,  $J = 7.8$  Hz, 2H), 7.61 (d,  $J = 7.8$  Hz, 2H), 7.54-7.47 (m, 6H), 7.36-7.16 (m, 20H), 7.08 (d,  $J = 7.8$  Hz, 4H), 4.48 (s, 2H, *dl*), 4.42 (s, 2H, *meso*), 3.61 (d,  $J = 12.5$  Hz, 2H, *meso*), 3.63-3.40 (m, 6H), 2.09 (br, 4H).  $^{13}\text{C NMR}$  (100 MHz,  $\text{CDCl}_3$ )  $\delta$  141.2 (q,  $J = 9.8$  Hz), 140.7 (q,  $J = 2.1$  Hz), 132.4 (q,  $J = 3.1$  Hz), 132.1 (q,  $J = 7.7$  Hz), 130.0 (m), 129.0 (m), 128.5, 128.3, 128.2, 127.7, 127.5, 127.4, 127.1, 126.8, 125.5, 123.2 (m), 123.0 (m), 62.6, 62.4, 51.6, 51.3. **HRMS** (ESI)  $m/z$  calcd. for  $\text{C}_{30}\text{H}_{26}\text{F}_6\text{N}_2\text{Na}$   $[\text{M}+\text{Na}]^+$ : 551.1892, found: 551.1883.



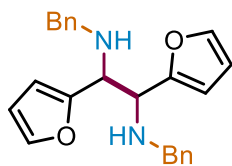

**N, N-Dibenzyl-1,2-di(furan-2-yl)ethane-1,2-diamine (60).** White solid, 47 mg, 63% yield, *dl* primary.  $^1\text{H NMR}$  (400 MHz,  $\text{CDCl}_3$ )  $\delta$  7.36-7.15 (m, 12H), 6.32 (m, 2H), 6.13 (d,  $J = 2.8$  Hz, 2H), 4.04 (s, 2H), 3.71 (d,  $J = 13.5$  Hz, 2H), 3.49 (d,  $J = 13.5$  Hz, 2H), 1.94 (br, 2H).  $^{13}\text{C NMR}$  (100 MHz,  $\text{CDCl}_3$ )  $\delta$  154.1, 142.1, 140.2, 128.4, 128.2, 127.0, 110.1, 108.6, 58.9, 51.2. **HRMS** (ESI)  $m/z$  calcd. for  $\text{C}_{24}\text{H}_{24}\text{N}_2\text{NaO}_2$   $[\text{M}+\text{Na}]^+$ : 395.1730, found: 395.1726

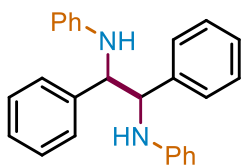

**N,N,1,2-Tetraphenylethane-1,2-diamine (61).**<sup>[18]</sup> White solid, 45 mg, 62% yield, *dl* : *meso* = 1:1.  $^1\text{H NMR}$  (400 MHz,  $\text{CDCl}_3$ )  $\delta$  7.22-6.94 (m, 28H), 6.67-6.34 (m, 4H), 6.52-6.49 (m, 8H), 4.96 (br, 2H, *meso*), 4.55 (br, 2CH, 4NH).  $^{13}\text{C NMR}$  (100 MHz,  $\text{CDCl}_3$ )  $\delta$  147.2, 146.6, 140.1, 138.4, 129.4, 129.2, 128.5, 128.4, 127.7, 127.5, 118.2, 118.0, 114.2, 113.9, 64.1, 62.1. **HRMS** (ESI)  $m/z$  calcd. for  $\text{C}_{26}\text{H}_{24}\text{N}_2$  Na  $[\text{M}+ \text{Na}]^+$ : 387.1832, found: 387.1830.

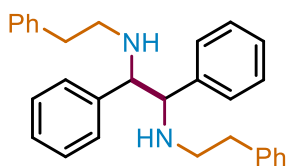

**N,N-Diphenethyl-1,2-diphenylethane-1,2-diamine (62).** Yellowish brown solid, 49 mg, 58% yield, *meso* primary.  $^1\text{H NMR}$  (400 MHz,  $\text{CDCl}_3$ )  $\delta$  7.25-6.94 (m, 20H), 3.72 (s, 2H), 2.57-2.45 (m, 8H).  $^{13}\text{C NMR}$  (100 MHz,  $\text{CDCl}_3$ )  $\delta$  140.97, 140.14, 128.66, 128.41, 127.62, 126.00, 68.54, 48.68, 36.15. **HRMS** (ESI)  $m/z$  calcd. for  $\text{C}_{30}\text{H}_{33}\text{N}_2$   $[\text{M}+\text{H}]^+$ : 421.2638, found: 421.2646.

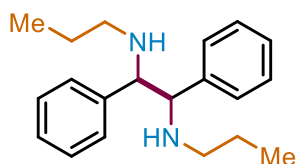

**1,2-Diphenyl-N,N-dipropylethane-1,2-diamine (63).**<sup>[19]</sup> White solid, 41 mg, 69% yield, *dl* : *meso* = 1:6.6. <sup>1</sup>H NMR (400 MHz, CDCl<sub>3</sub>) δ 7.34-7.02 (m, 20H), 3.73 (s, 2H, *meso*), 3.61 (s, 2H, *dl*), 2.41-2.33 (m, 4H, *dl*), 2.27-2.16 (m, 4H, *meso*), 1.47-1.38 (m, 4H, *dl*), 1.30-1.23 (m, 4H, *meso*), 0.85 (t, *J* = 7.4 Hz, 6H, *dl*), 0.67 (t, *J* = 7.4 Hz, 6H, *meso*). <sup>13</sup>C NMR (100 MHz, CDCl<sub>3</sub>) δ 142.0, 141.6, 128.5, 128.4, 128.0, 127.9, 127.6, 126.8, 69.5, 68.7, 49.8, 49.4, 23.4, 22.9, 11.9, 11.6. HRMS (ESI) *m/z* calcd. for C<sub>20</sub>H<sub>29</sub>N<sub>2</sub> [M+H]<sup>+</sup>: 297.2325, found: 297.2324.

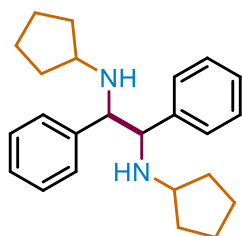

**N,N-Dicyclopentyl-1,2-diphenylethane-1,2-diamine (64).**<sup>[20]</sup> White solid, 54 mg, 78% yield, *dl* : *meso* = 1:1.7. <sup>1</sup>H NMR (400 MHz, CDCl<sub>3</sub>) δ 7.32-7.03 (m, 20H), 3.80 (s, 2H, *meso*), 3.64 (s, 2H, *dl*), 2.81 (t, *J* = 6.1 Hz, 2H, *dl*), 2.67 (t, *J* = 6.1 Hz, 2H, *meso*), 1.69-1.01 (m, 32H). <sup>13</sup>C NMR (100 MHz, CDCl<sub>3</sub>) δ 142.3, 141.7, 128.6, 128.3, 128.1, 127.8, 127.5, 126.7, 67.9, 67.1, 57.4, 57.1, 34.2, 33.8, 32.4, 32.1, 23.8, 23.7, 23.6, 23.5. HRMS (ESI) *m/z* calcd. for C<sub>24</sub>H<sub>33</sub>N<sub>2</sub> [M+H]<sup>+</sup>: 349.2638, found: 349.2645.

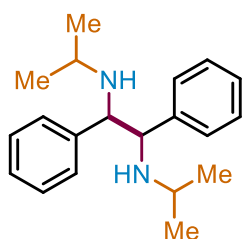

**N,N-Diisopropyl-1,2-diphenylethane-1,2-diamine (65).**<sup>[20]</sup> White solid, 49 mg, 83% yield, *dl* : *meso* = 1:1.6. <sup>1</sup>H NMR (400 MHz, CDCl<sub>3</sub>) δ 7.27-7.00 (m, 20H), 3.90 (s, 2H, *meso*), 3.71 (s, 2H, *dl*), 2.53 (q, *J* = 6.1 Hz, 2H, *dl*), 2.46 (q, *J* = 6.1 Hz, 2H, *meso*), 1.00-0.91 (m, 12H, *dl*), 0.90-0.75 (m, 12H, *meso*). <sup>13</sup>C NMR (100 MHz, CDCl<sub>3</sub>) δ 142.4, 141.5, 128.4, 128.1, 128.0, 127.8, 127.2, 126.7, 66.8, 65.6, 46.1, 45.5, 24.6, 24.3, 22.2,

22.0. HRMS (ESI)  $m/z$  calcd. for  $C_{20}H_{29}N_2$   $[M+H]^+$ : 297.2325, found: 297.2329.

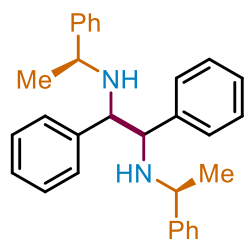

**1,2-Diphenyl-N,N-bis((S)-1-phenylethyl)ethane-1,2-diamine (66).**<sup>[21,22]</sup> White solid, 70 mg, 83% yield, *dl* : *meso* = 2.6:1. **<sup>1</sup>H NMR of (R, S + S, S)-66** (400 MHz,  $CDCl_3$ )  $\delta$  7.28-6.88(m, 40H), 3.87 (s, 2H, S, S), 3.73 (d,  $J$  = 6.8 Hz, 2H, R, S), 3.58 (q,  $J$  = 6.6 Hz, 2H, S, S), 3.57 (d,  $J$  = 6.8 Hz, 2H, R, S), 3.37 (q,  $J$  = 6.7 Hz, 2H, R, S), 3.27 (q,  $J$  = 6.7 Hz, 2H, R, S), 1.77 (br, 4H), 1.29 (d,  $J$  = 6.5 Hz, 6H, S, S), 1.16 (d,  $J$  = 6.7 Hz, 3H, R, S), 1.07 (d,  $J$  = 6.5 Hz, 3H, R, S). **<sup>13</sup>C NMR of (R, S + S, S)-66** (100 MHz,  $CDCl_3$ )  $\delta$  146.7, 146.1, 145.6, 141.7, 141.6, 141.0, 128.6, 128.5, 128.3, 128.2, 128.1, 127.9, 127.4, 127.3, 126.86, 126.82, 126.76, 126.64, 126.60, 66.5, 65.7, 64.2, 54.9, 54.8, 54.5, 24.7, 22.6, 22.1. **<sup>1</sup>H NMR of (R, R)-66** (400 MHz,  $CDCl_3$ )  $\delta$  7.27-6.91 (m, 20H), 3.42 (q,  $J$  = 6.6 Hz, 2H), 3.37 (s, 2H), 2.02 (br, 2H), 1.25 (d,  $J$  = 6.6 Hz, 6H). **<sup>13</sup>C NMR of (R, R)-66** (100 MHz,  $CDCl_3$ )  $\delta$  145.7, 141.8, 128.5, 128.1, 128.0, 126.8, 126.7, 65.9, 55.2, 25.4. **HRMS** (ESI)  $m/z$  calcd. for  $C_{30}H_{33}N_2$   $[M+H]^+$ : 421.2638, found: 421.2639.

## 9. References

- [1] J. Zhang, Y. Li, F. Zhang, C. Hu and Y. Chen, *Angew. Chem., Int. Ed.*, 2016, **55**, 1872–1875.
- [2] M. Nakajima, E. Fava, S. Loescher, Z. Jiang and M. Rueping, *Angew. Chem., Int. Ed.*, 2015, **54**, 8828–8832.
- [3] Y.-X. Liao, C.-H. Xing, P. He and Q.-S. Hu, *Org. Lett.*, 2008, **10**, 2509–2512.
- [4] S. Zhang, L. Li, J. Li, J. Shi, K. Xu, W. Gao, L. Zong, G. Li and M. Findlater, *Angew. Chem., Int. Ed.*, 2021, **60**, 7275–7282.
- [5] A. L. Berger, K. Donabauer and B. König, *Chem. Sci.*, 2018, **9**, 7230–7235.
- [6] T. Duhamel and K. Muñiz, *Chem. Commun.*, 2019, **55**, 933–936.

- [7] N. C. Mamillapalli and G. Sekar, *RSC Adv.*, 2014, **4**, 61077–61085.
- [8] K. Li, Q. Wan, C. Yang, X.-Y. Chang, K.-H. Low and C.-M. Che, *Angew. Chem., Int. Ed.*, 2018, **57**, 14129–14133.
- [9] C. Liu, R. Li, W. Zhou, Y. Liang, Y. Shi, R.-L. Li, Y. Ling, Y. Yu, J. Li and B. Zhang, *ACS Catal.*, 2021, **11**, 8958–8967.
- [10] Y.-B. Huang, Z. Yang, J.-J. Dai, Q.-X. Guo and Y. Fu, *RSC Adv.*, 2012, **2**, 11211–11214.
- [11] A. Caron, É. Morin and S. K. Collins, *ACS Catal.*, 2019, **9**, 9458–9464.
- [12] H. Ito and A. Sudo, *Results Chem.*, 2021, **3**, 100123.
- [13] J. Jo, S. Kim, J.-H. Choi and W.-J. Chung, *Chem. Commun.*, 2021, **57**, 1360–1363.
- [14] L. Qi and Y. Chen, *Angew Chem., Int. Ed.*, 2016, **55**, 13312–13315.
- [15] D. Liu, J. Zhang and Y. Chen, *Synlett*, 2021, **32**, 356–361.
- [16] S. Okamoto, R. Ariki, H. Tsujioka and A. Sudo, *J. Org. Chem.*, 2017, **82**, 9731–9736.
- [17] H. Wang, J.-P. Qu and Y.-B. Kang, *Org. Lett.*, 2021, **23**, 2900–2903.
- [18] L. Leng and J. M. Ready, *ACS Catal.*, 2020, **10**, 13196–13201.
- [19] M. P. Dutta, B. Baruah, A. Boruah, D. Prajapati and J. S. Sandhu, *Synlett*, 1998, **8**, 857–858.
- [20] P.-Q. Huang, Q.-W. Lang, A.-E Wang and J.-F. Zheng, *Chem. Commun.*, 2015, **51**, 1096–1099.
- [21] K. Bambridge, M. J. Begley and N. S. Simpkins, *Tetrahedron Lett.*, 1994, **35** 3391–3394.
- [22] G. Martelli, S. Mori and D. Savoia, *Tetrahedron*, 2000, **56**, 8367–8374.

## 10. Copies of NMR Spectra.

<sup>1</sup>H NMR (400 MHz, CDCl<sub>3</sub>) spectrum of compound 1

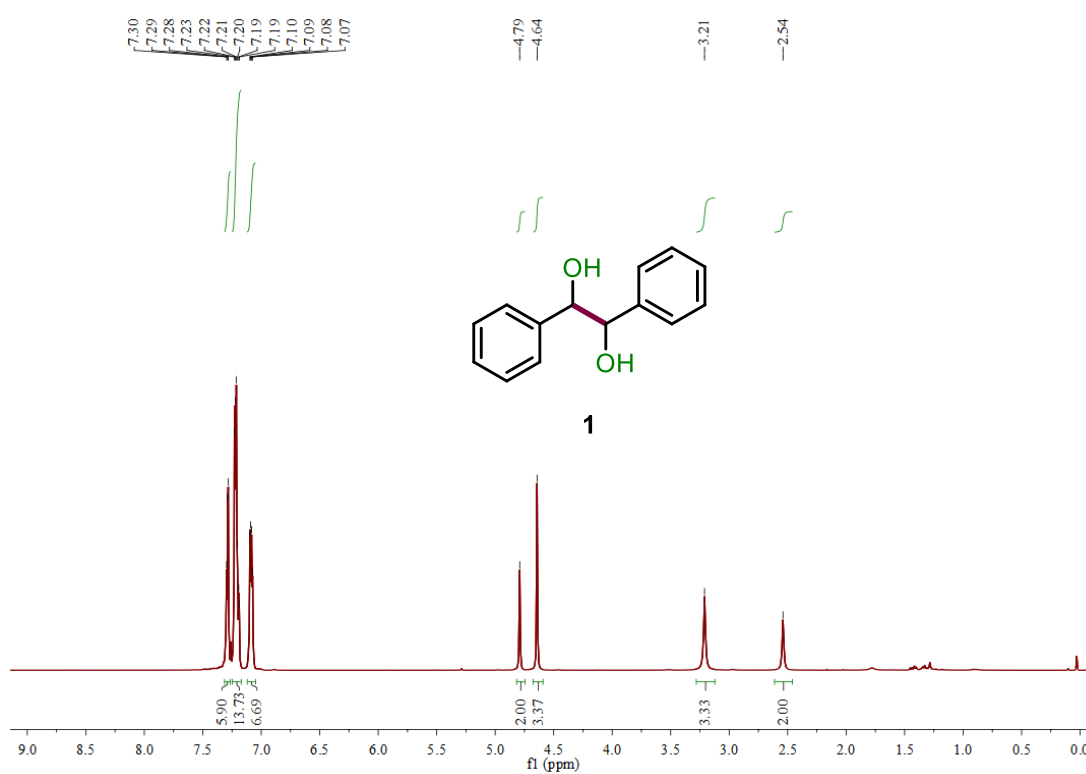

<sup>13</sup>C NMR (100 MHz, CDCl<sub>3</sub>) spectrum of compound 1

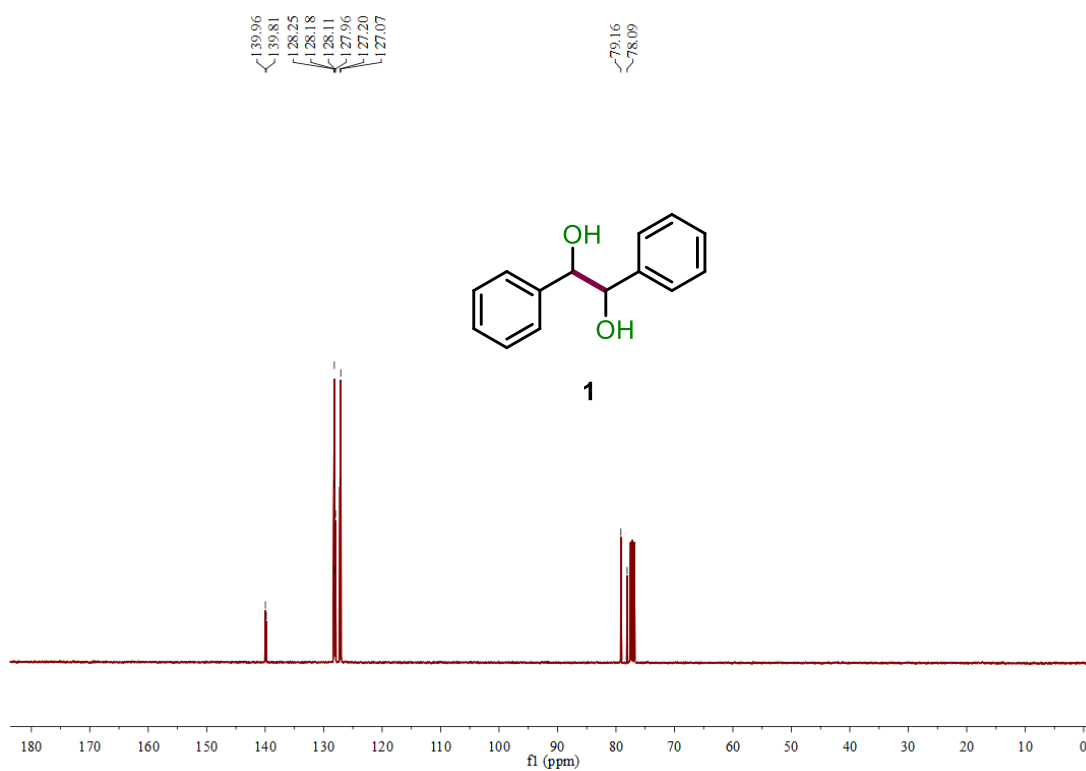

**<sup>1</sup>H NMR (400 MHz, CDCl<sub>3</sub>) spectrum of compound 1a**

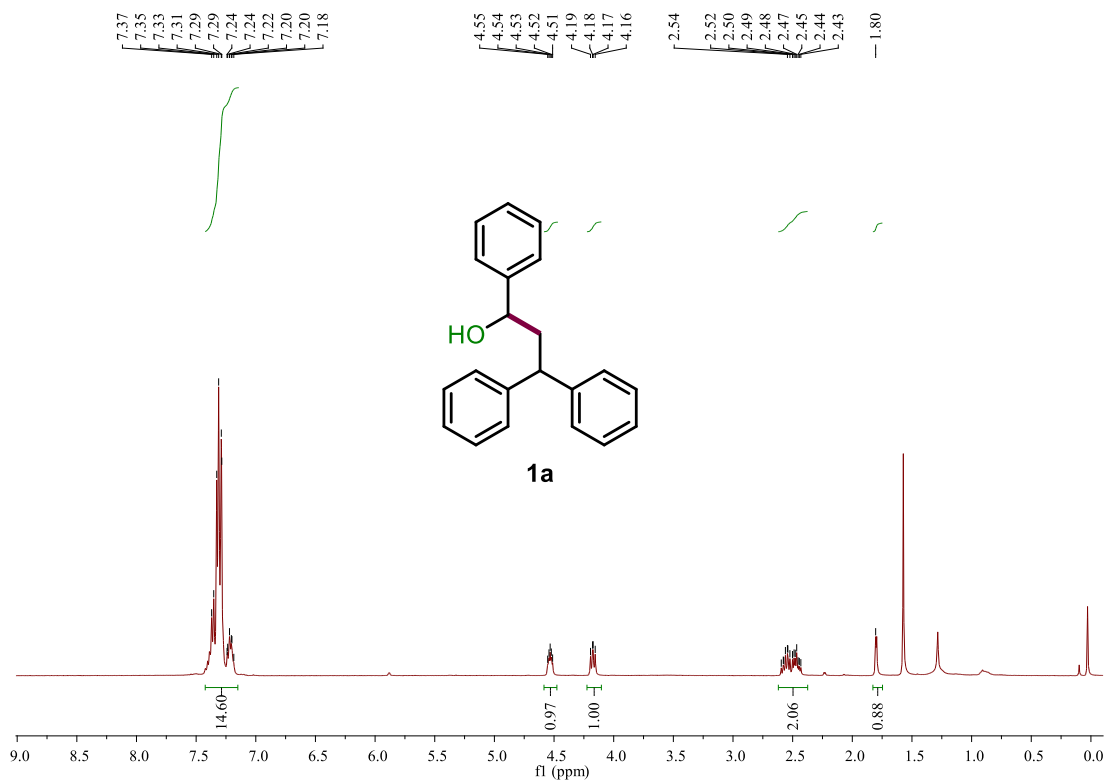

**<sup>13</sup>C NMR (100 MHz, CDCl<sub>3</sub>) spectrum of compound 1a**

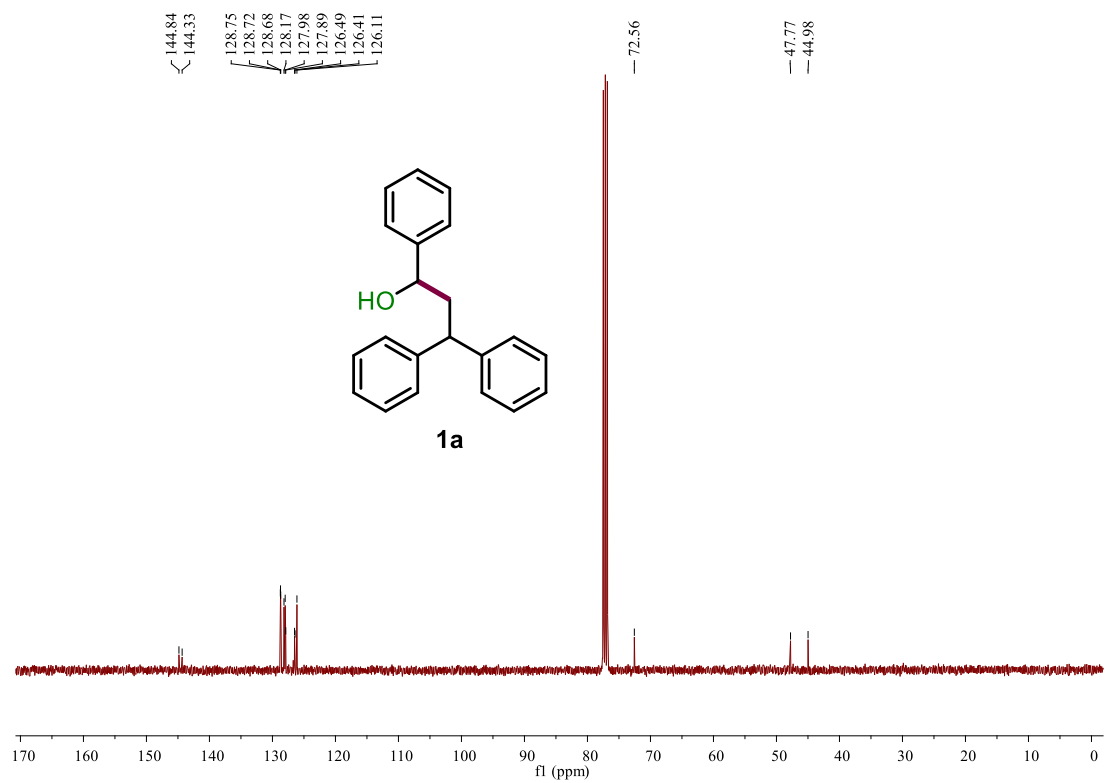

**<sup>1</sup>H NMR (400 MHz, CDCl<sub>3</sub>) spectrum of compound 1b**

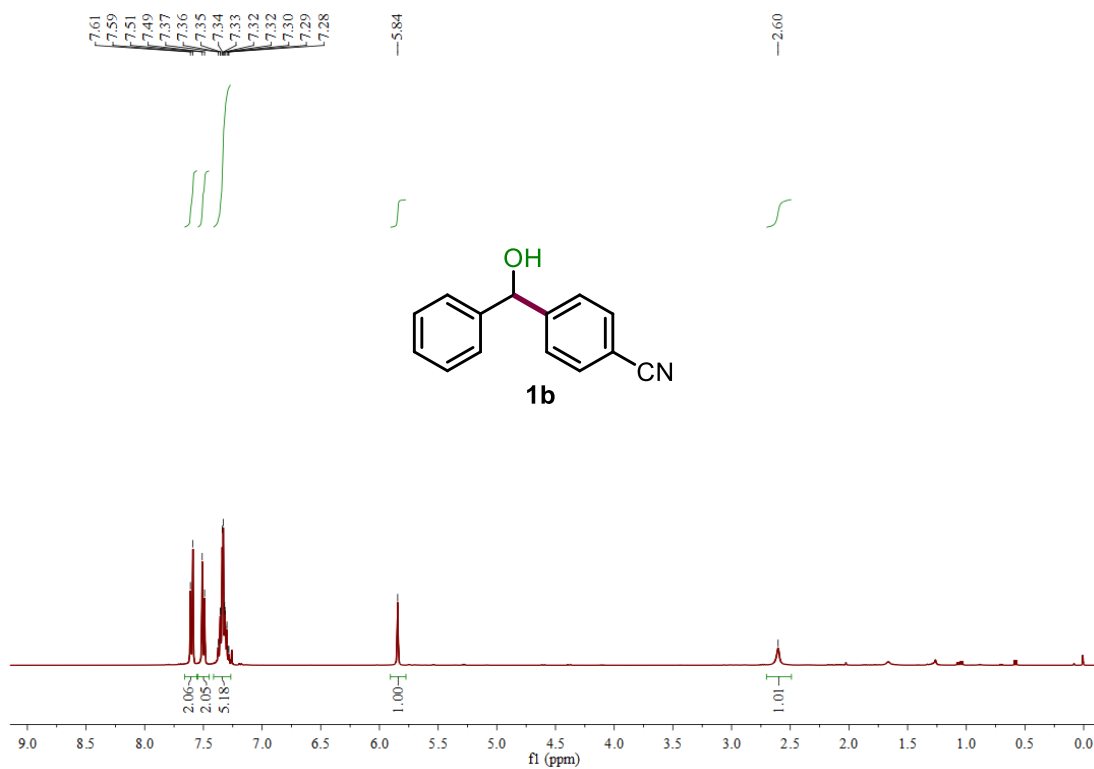

**<sup>13</sup>C NMR (100 MHz, CDCl<sub>3</sub>) spectrum of compound 1b**

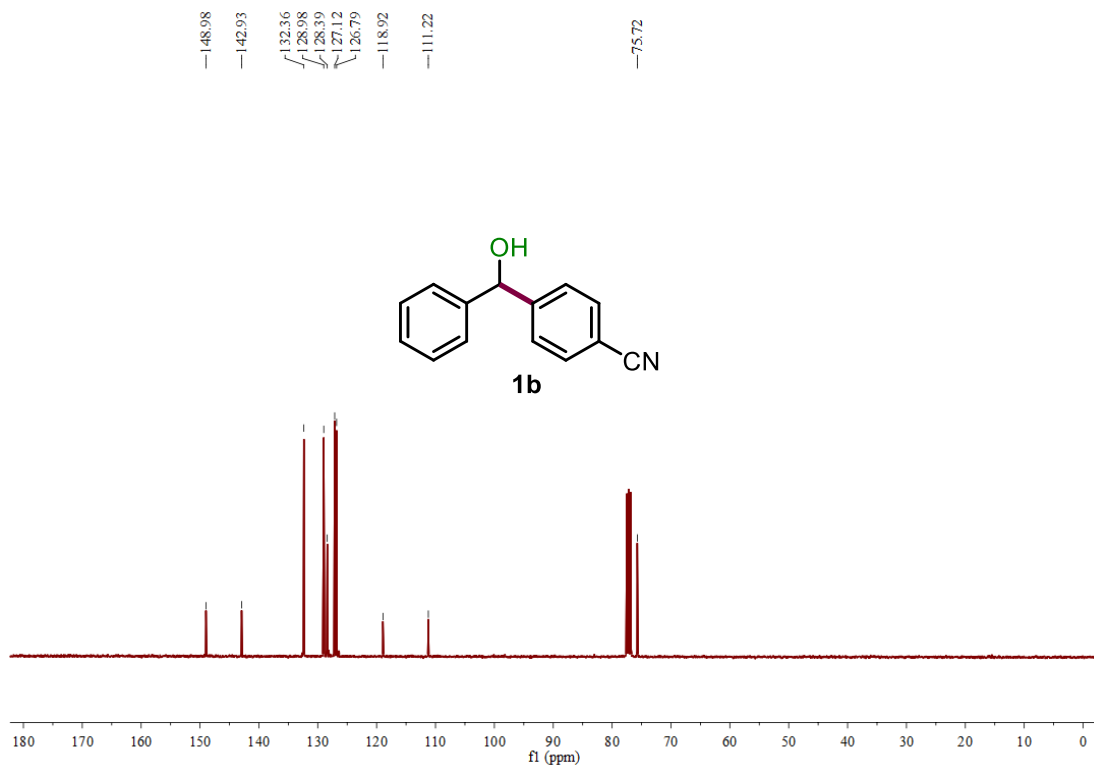

**<sup>1</sup>H NMR (400 MHz, CDCl<sub>3</sub>) spectrum of compound 1c**

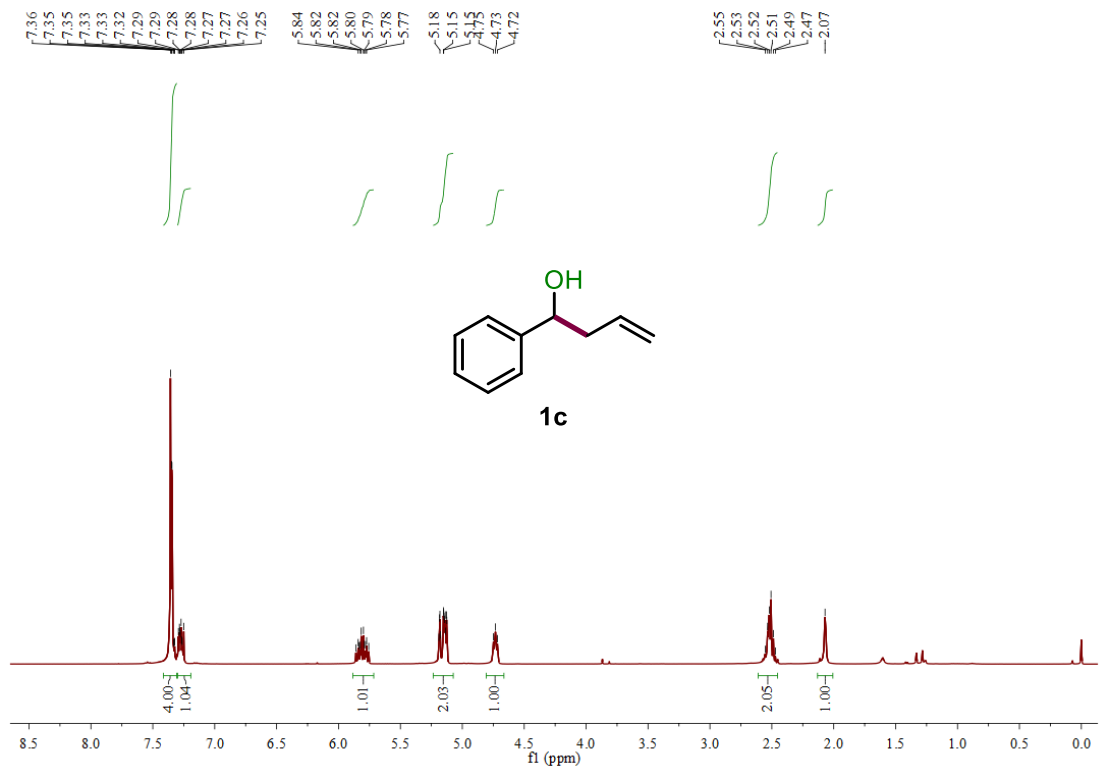

**<sup>13</sup>C NMR (100 MHz, CDCl<sub>3</sub>) spectrum of compound 1c**

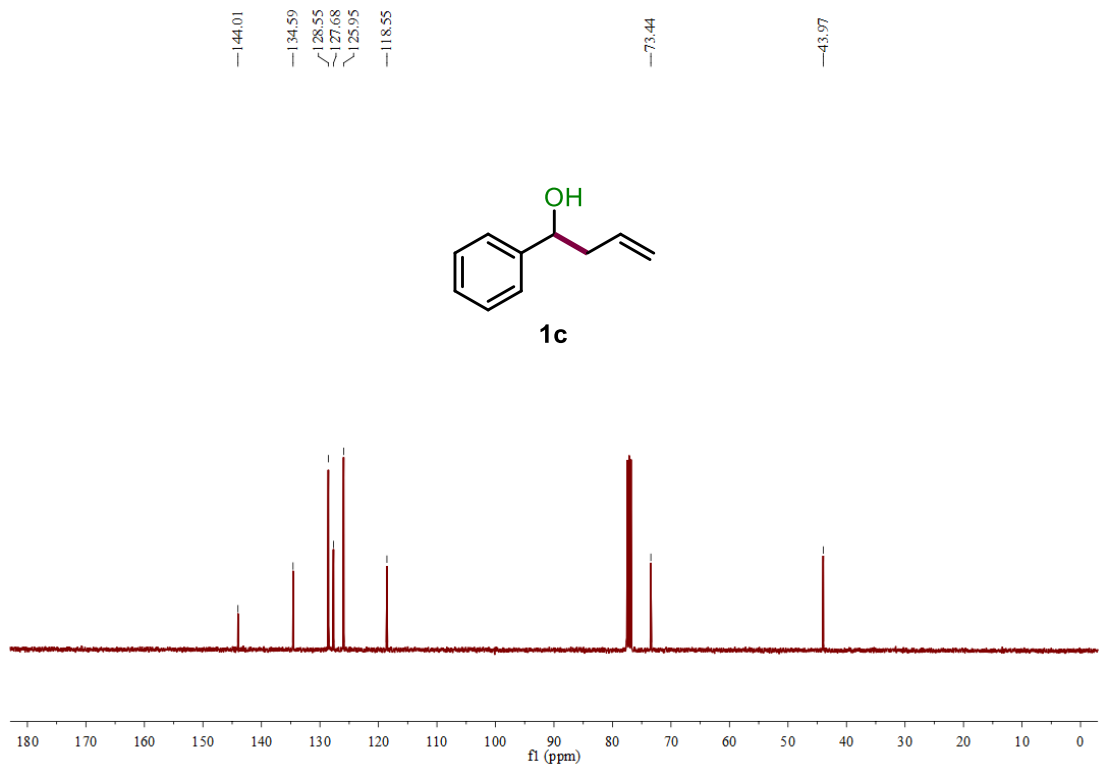



**<sup>1</sup>H NMR (400 MHz, CDCl<sub>3</sub>) spectrum of compound 1d**

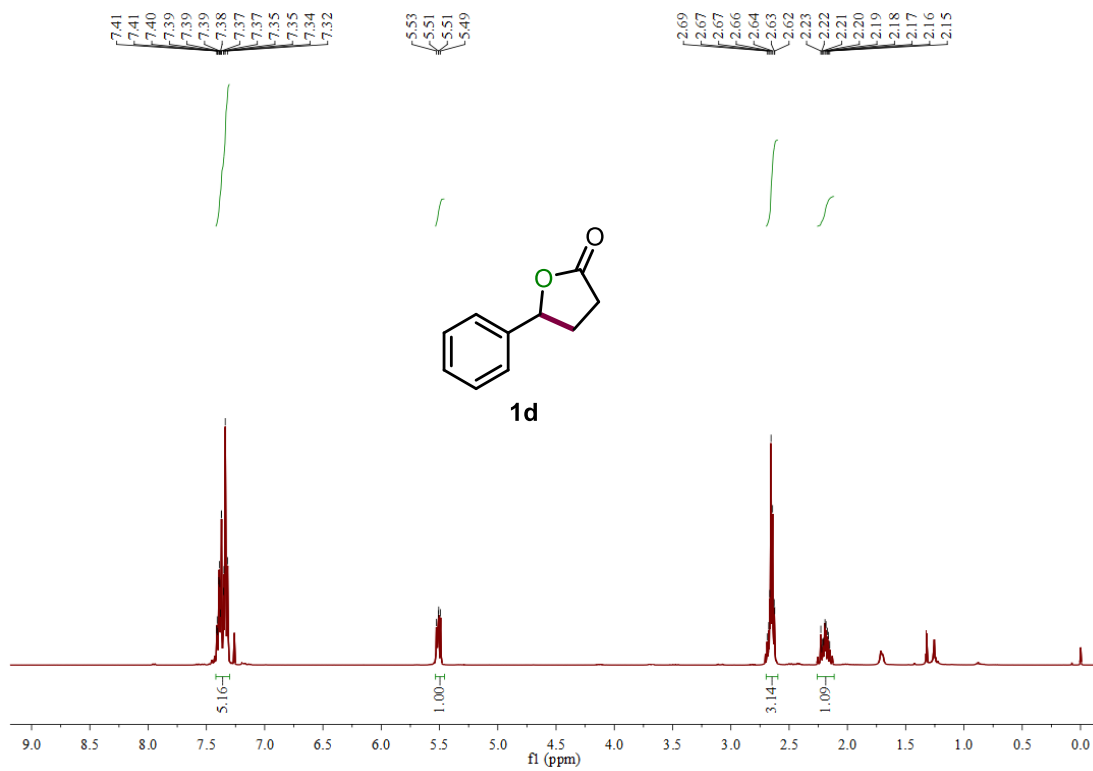

**<sup>13</sup>C NMR (100 MHz, CDCl<sub>3</sub>) spectrum of compound 1d**

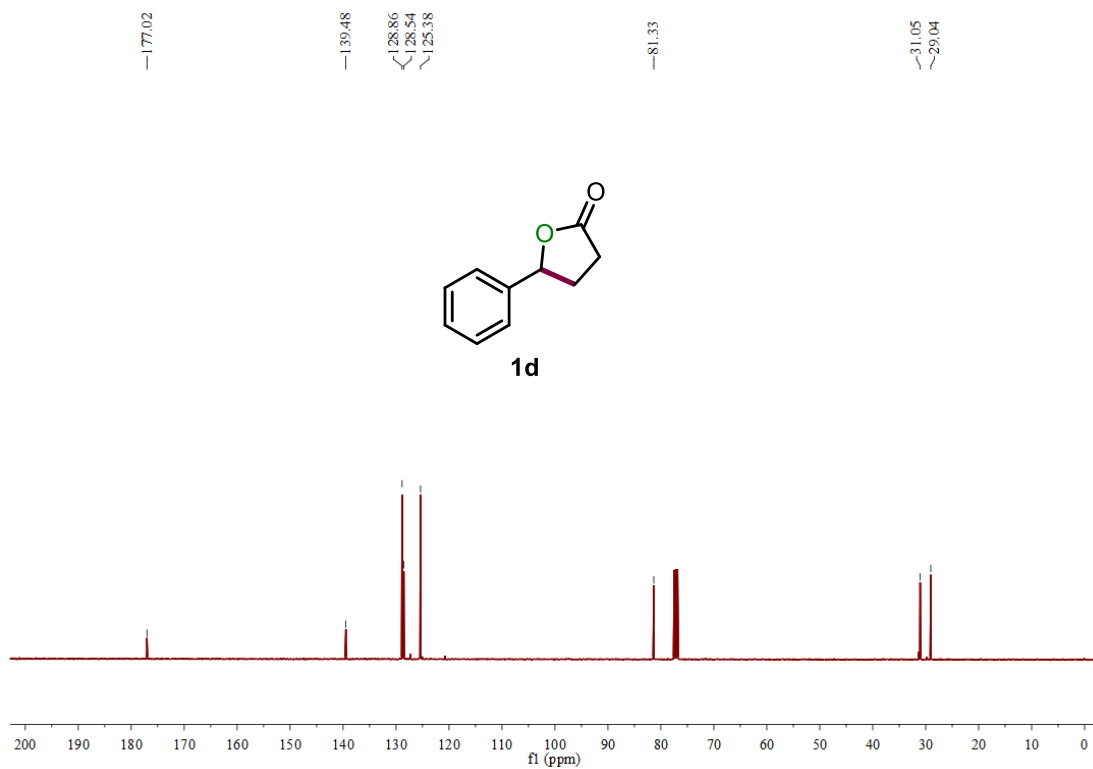

**<sup>1</sup>H NMR (400 MHz, CDCl<sub>3</sub>) spectrum of compound 1e**

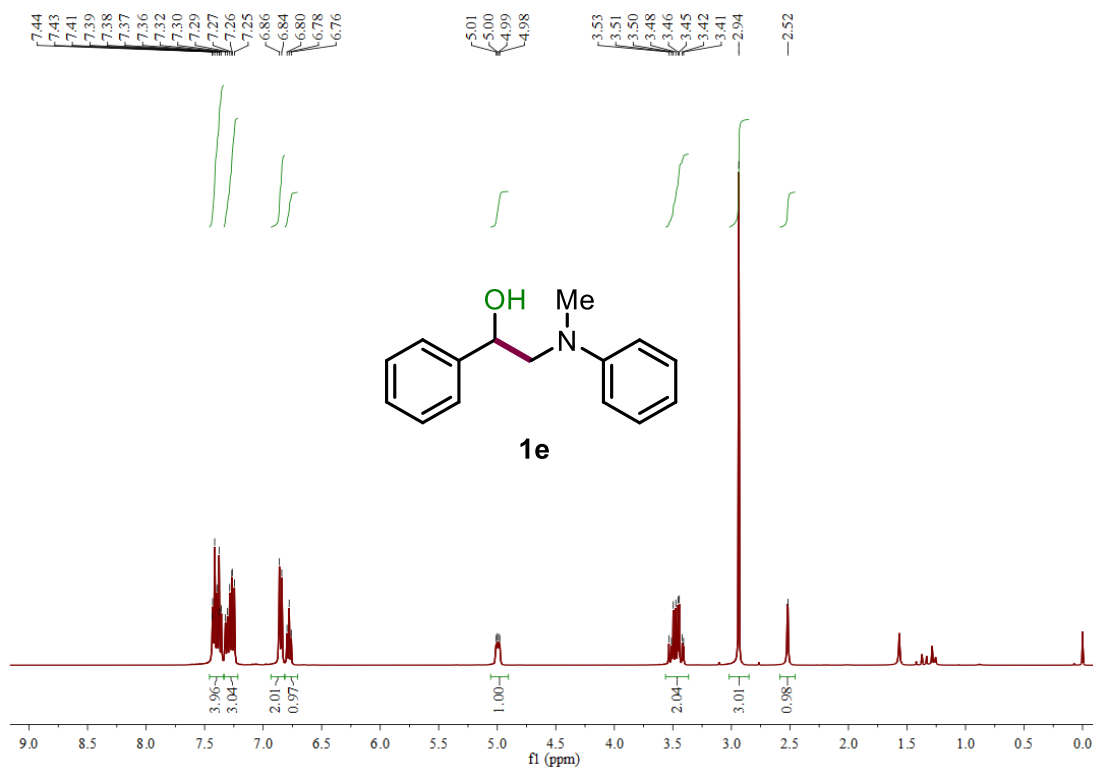

**<sup>13</sup>C NMR (100 MHz, CDCl<sub>3</sub>) spectrum of compound 1e**

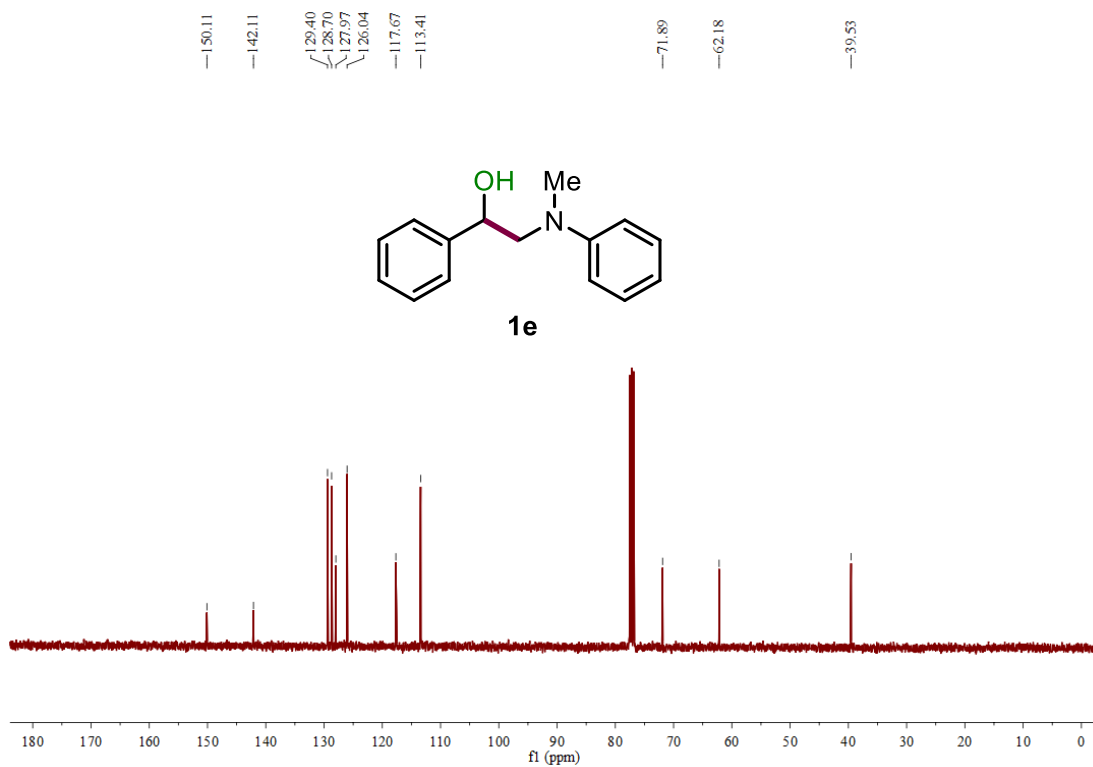

**<sup>1</sup>H NMR (400 MHz, CDCl<sub>3</sub>) spectrum of compound 2**

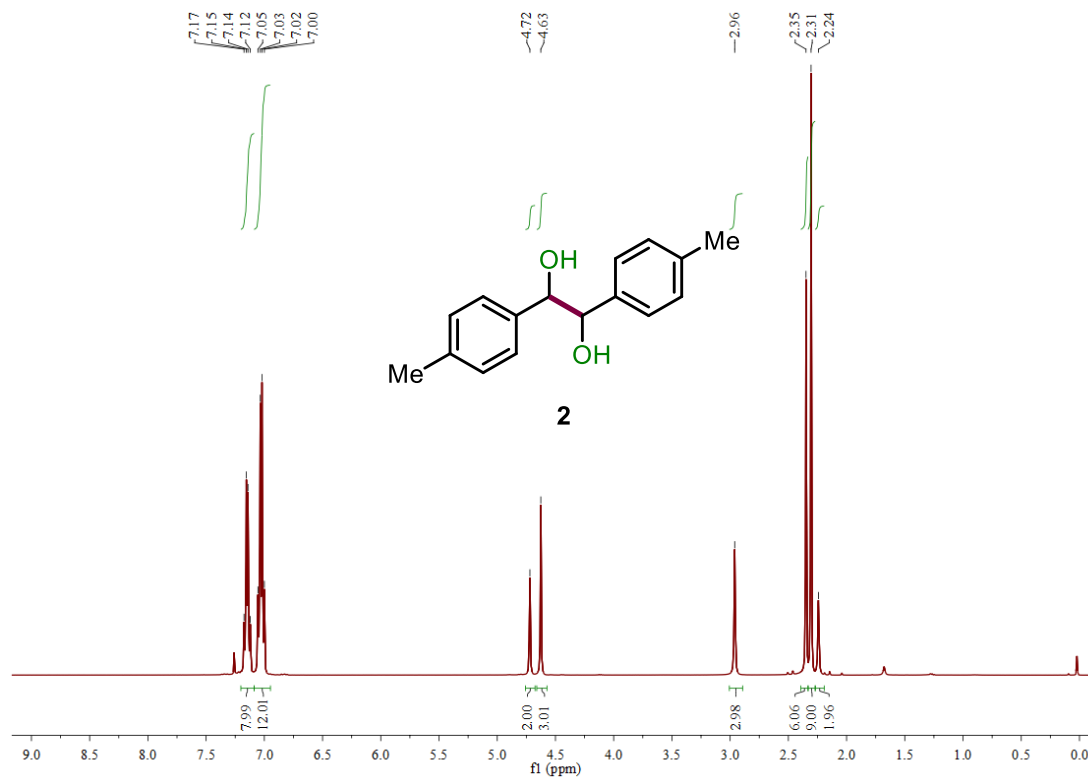

**<sup>13</sup>C NMR (100 MHz, CDCl<sub>3</sub>) spectrum of compound 2**

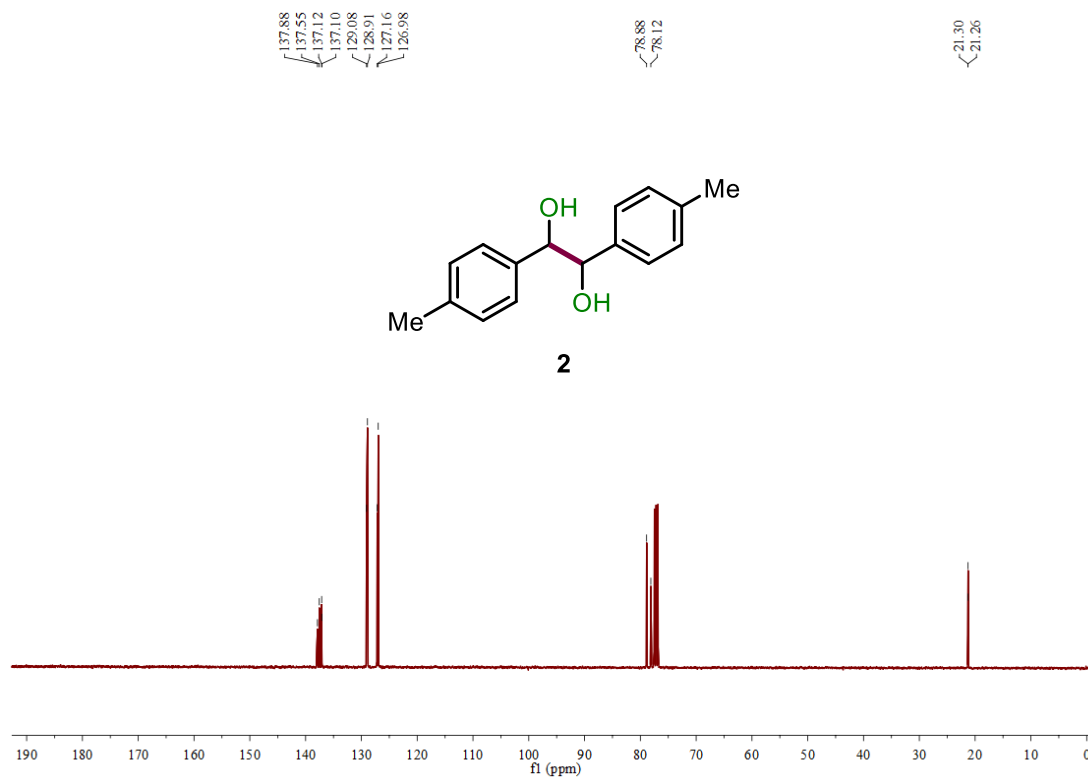

**<sup>1</sup>H NMR (400 MHz, CDCl<sub>3</sub>) spectrum of compound 3**

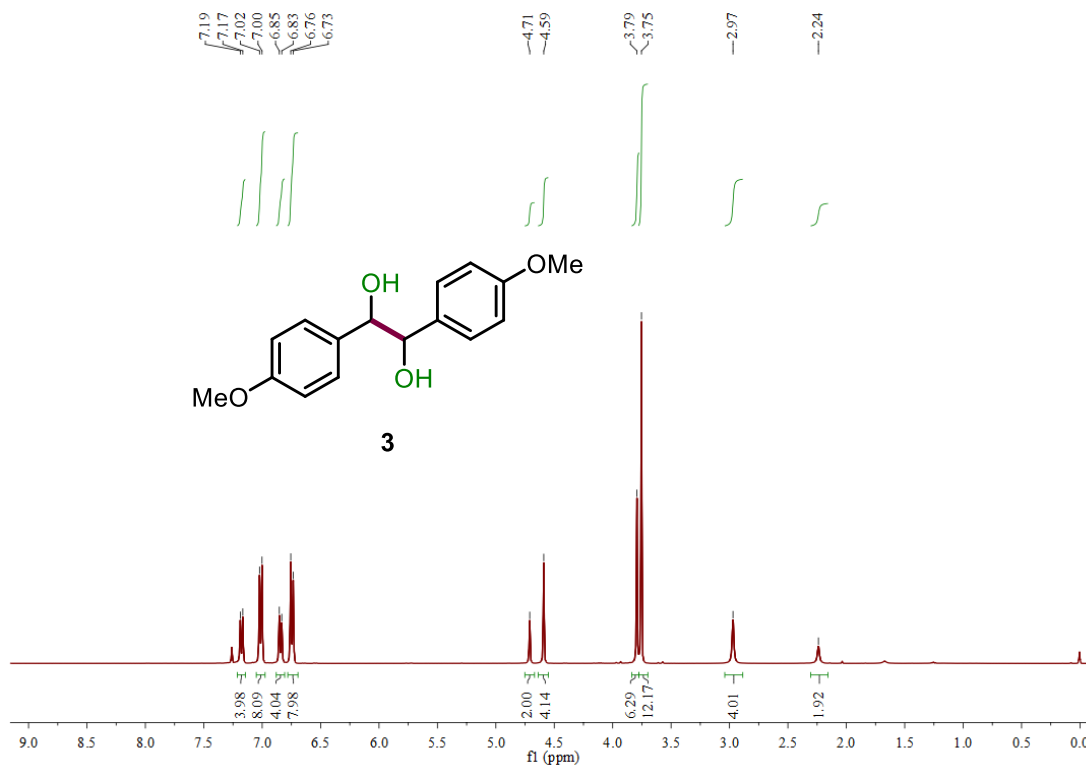

**<sup>13</sup>C NMR (100 MHz, CDCl<sub>3</sub>) spectrum of compound 3**

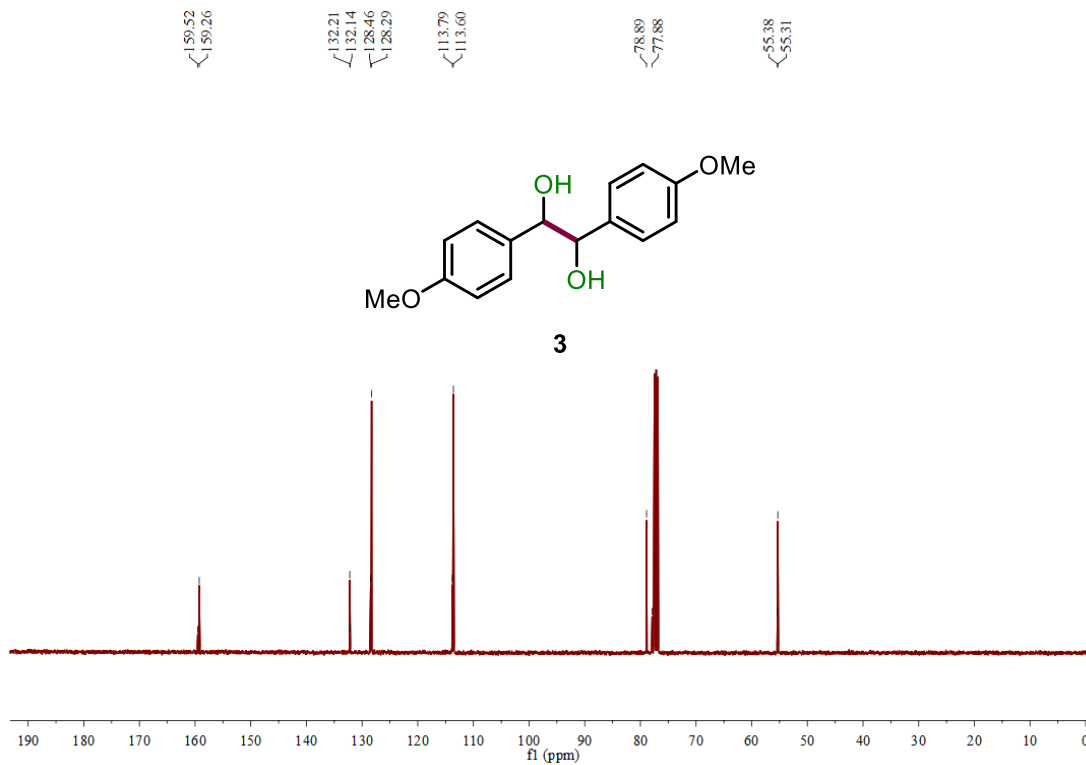

**<sup>1</sup>H NMR (400 MHz, DMSO-*d*<sub>6</sub>) spectrum of compound 4**

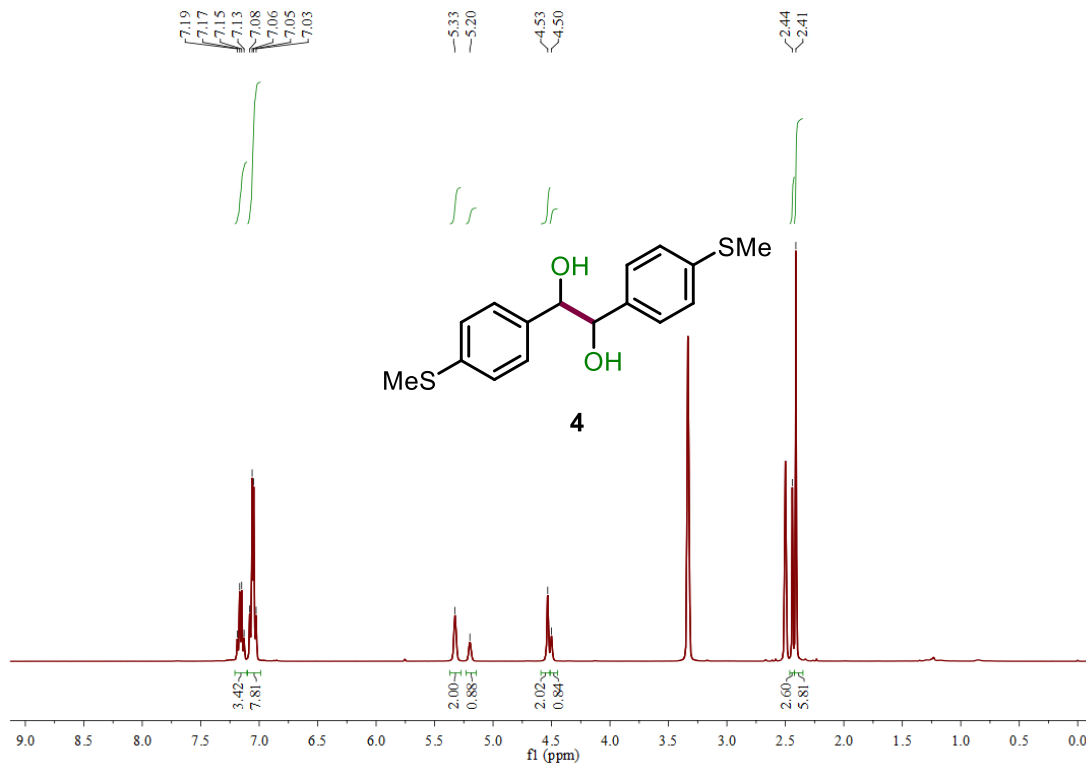

**<sup>13</sup>C NMR (100 MHz, DMSO-*d*<sub>6</sub>) spectrum of compound 4**

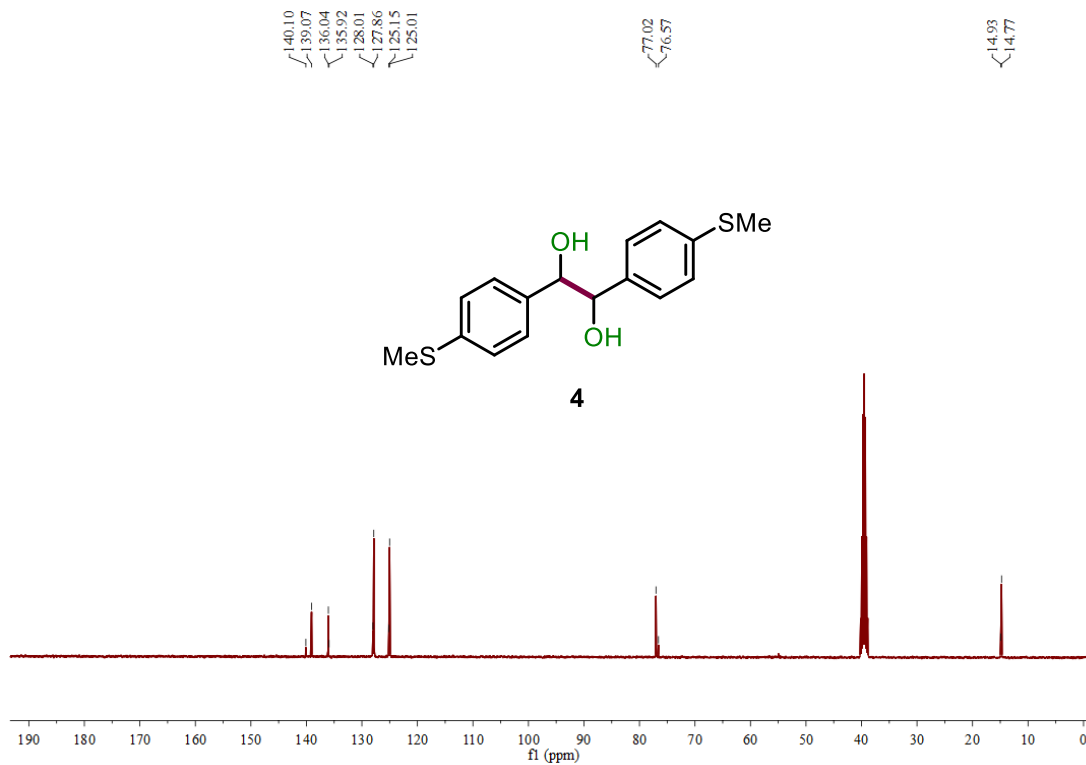

**<sup>1</sup>H NMR (400 MHz, CDCl<sub>3</sub>) spectrum of compound 5**

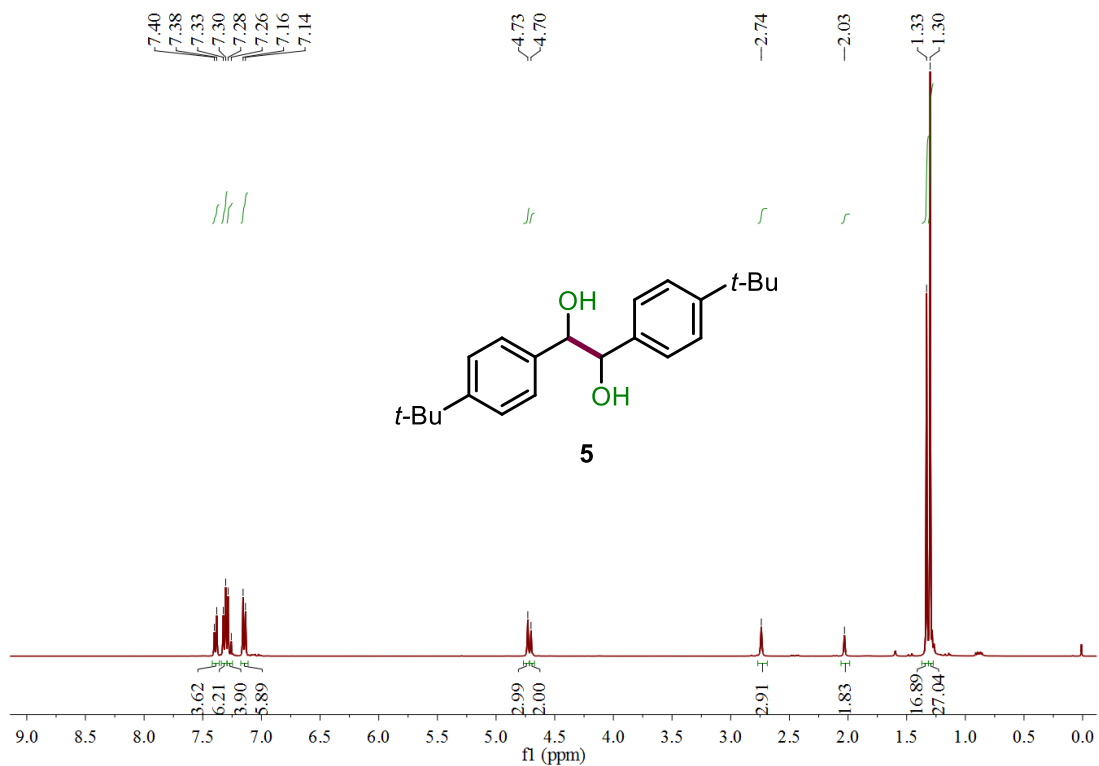

**<sup>13</sup>C NMR (100 MHz, CDCl<sub>3</sub>) spectrum of compound 5**

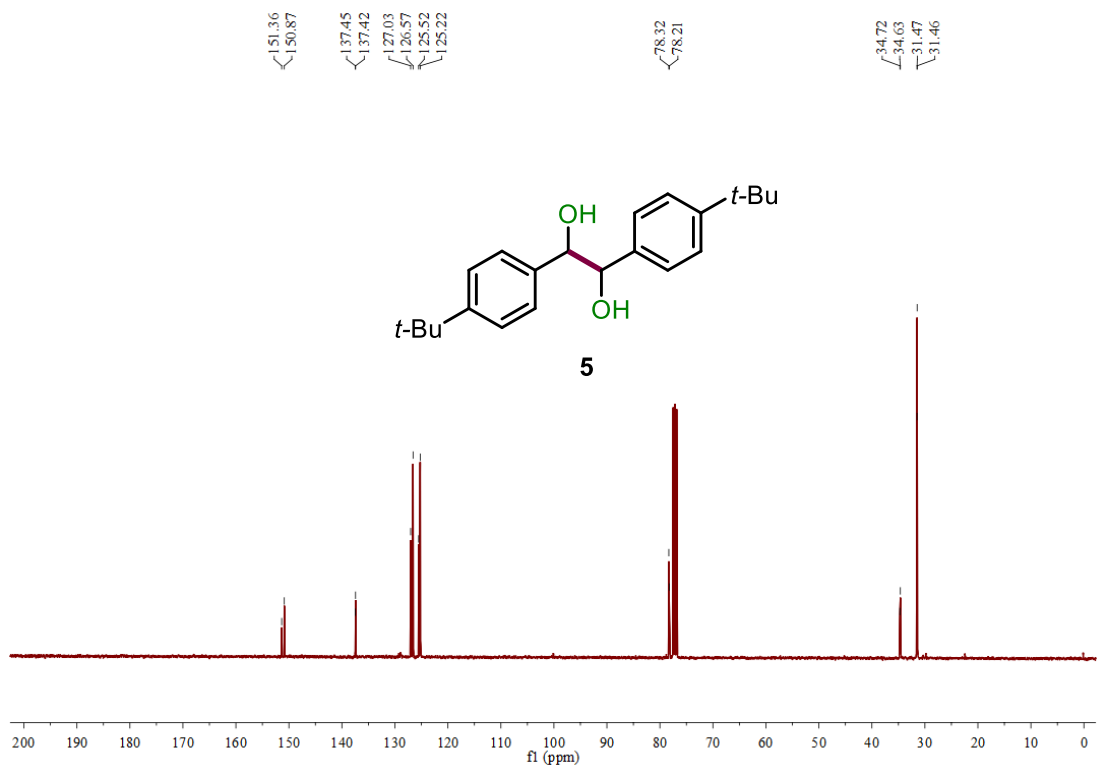

**<sup>1</sup>H NMR (400 MHz, DMSO-*d*<sub>6</sub>) spectrum of compound 6**

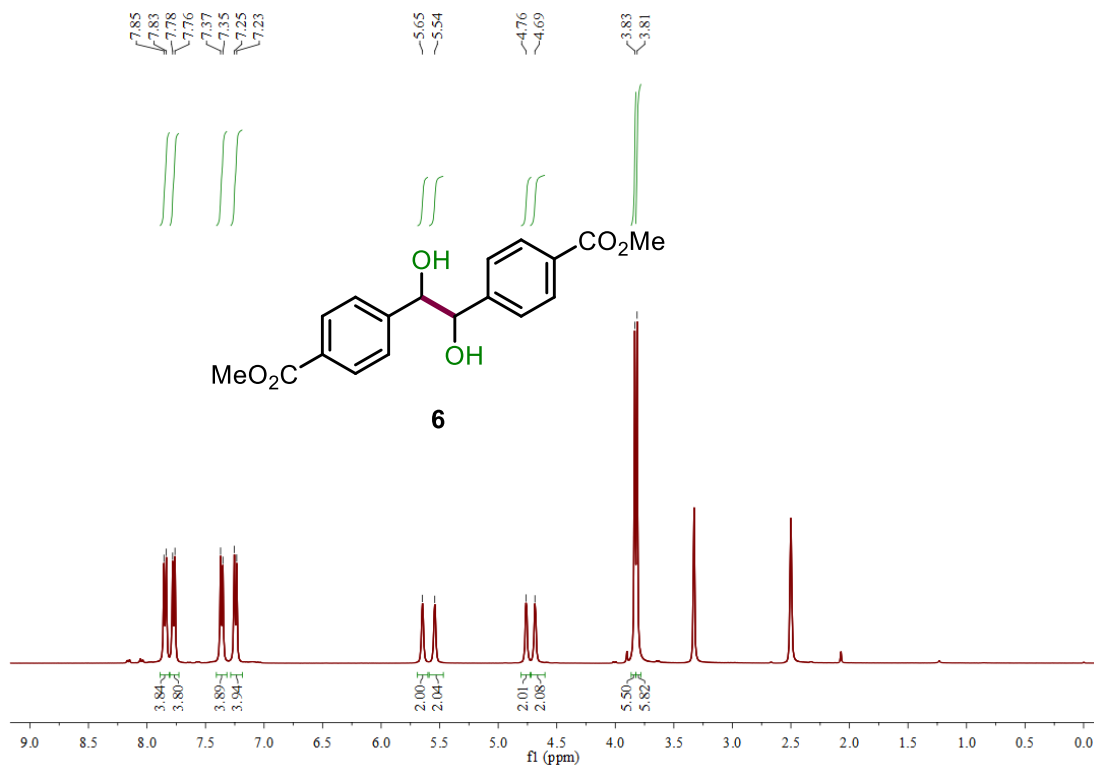

**<sup>13</sup>C NMR (100 MHz, DMSO-*d*<sub>6</sub>) spectrum of compound 6**

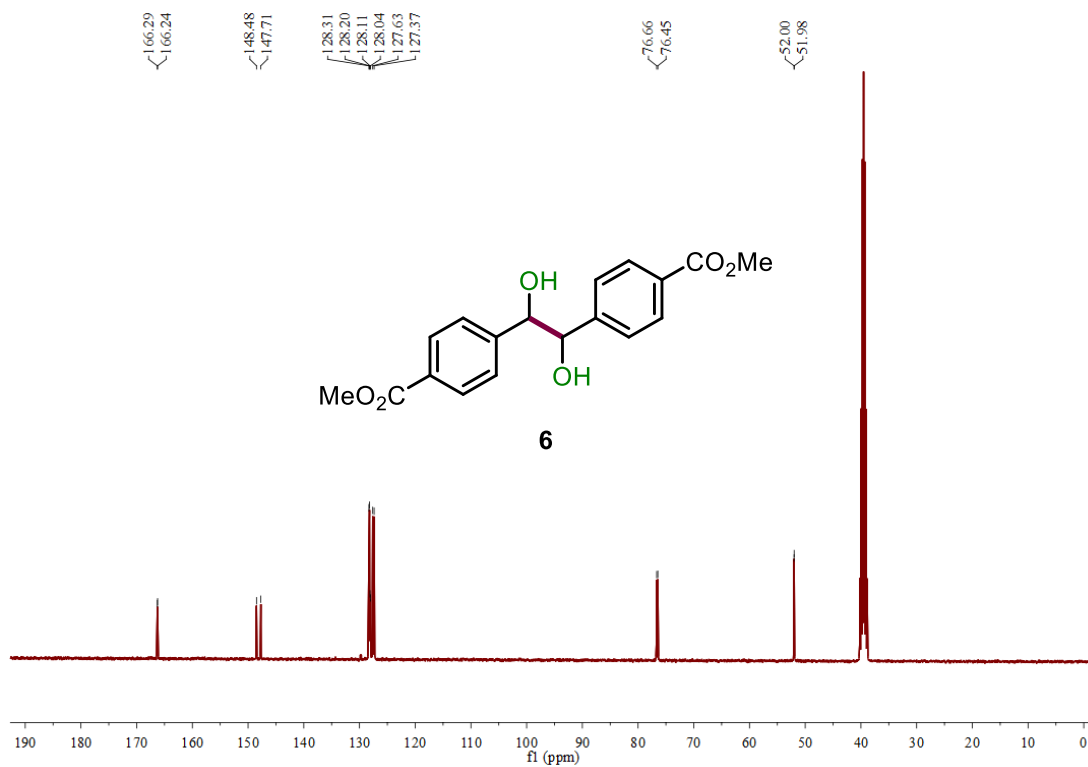

### <sup>1</sup>H NMR (400 MHz, CDCl<sub>3</sub>) spectrum of compound 7

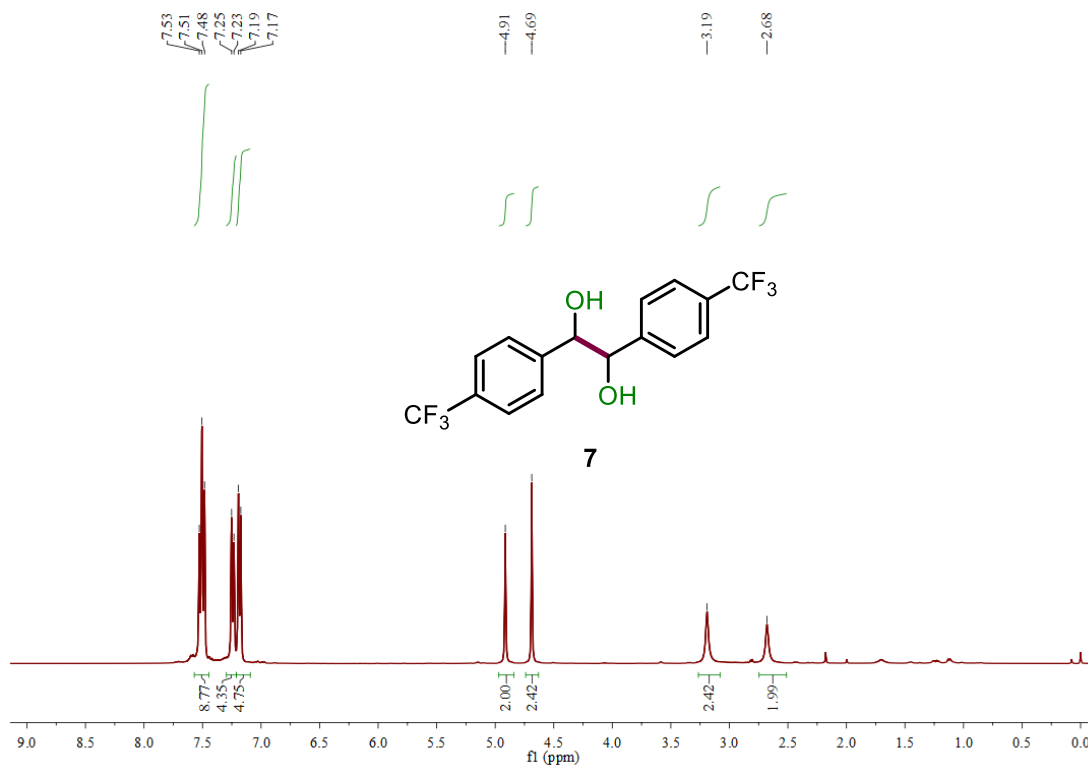

### <sup>13</sup>C NMR (100 MHz, CDCl<sub>3</sub>) spectrum of compound 7

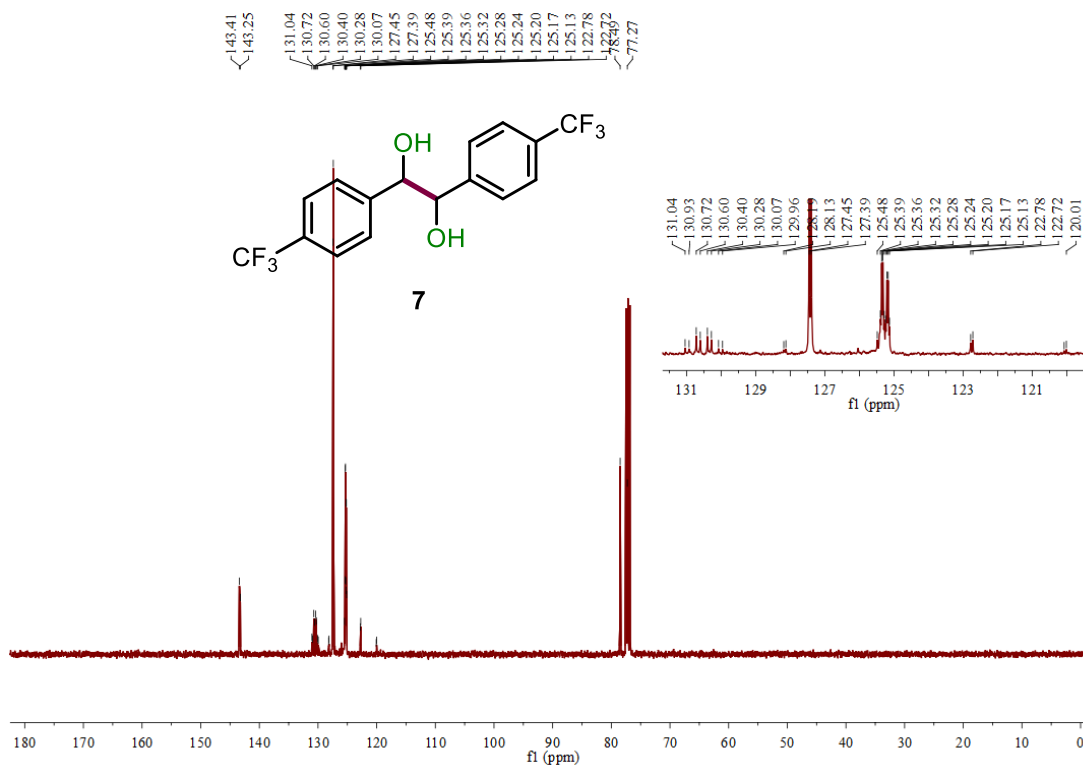



**<sup>19</sup>F NMR (376 MHz, CDCl<sub>3</sub>) spectrum of compound 7**

{  
-62.57  
-62.60

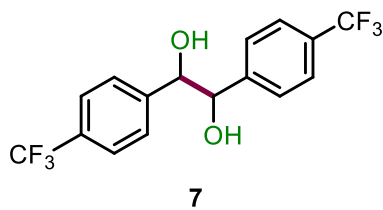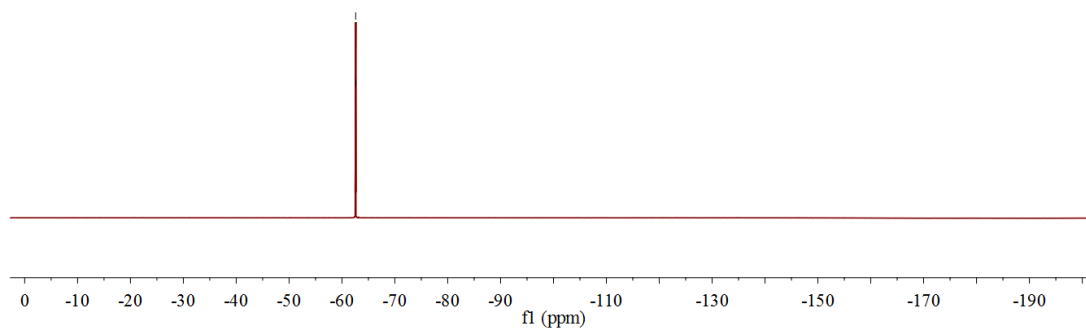

**<sup>1</sup>H NMR (400 MHz, CDCl<sub>3</sub>) spectrum of compound 8**

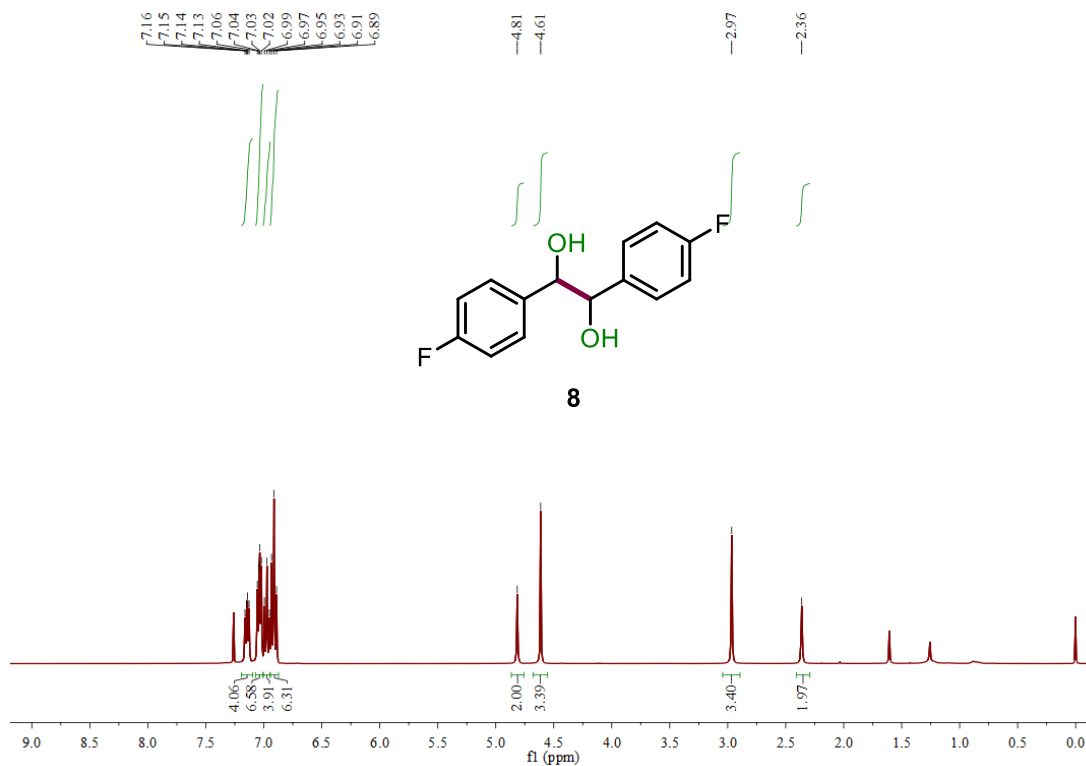

**<sup>13</sup>C NMR (100 MHz, CDCl<sub>3</sub>) spectrum of compound 8**

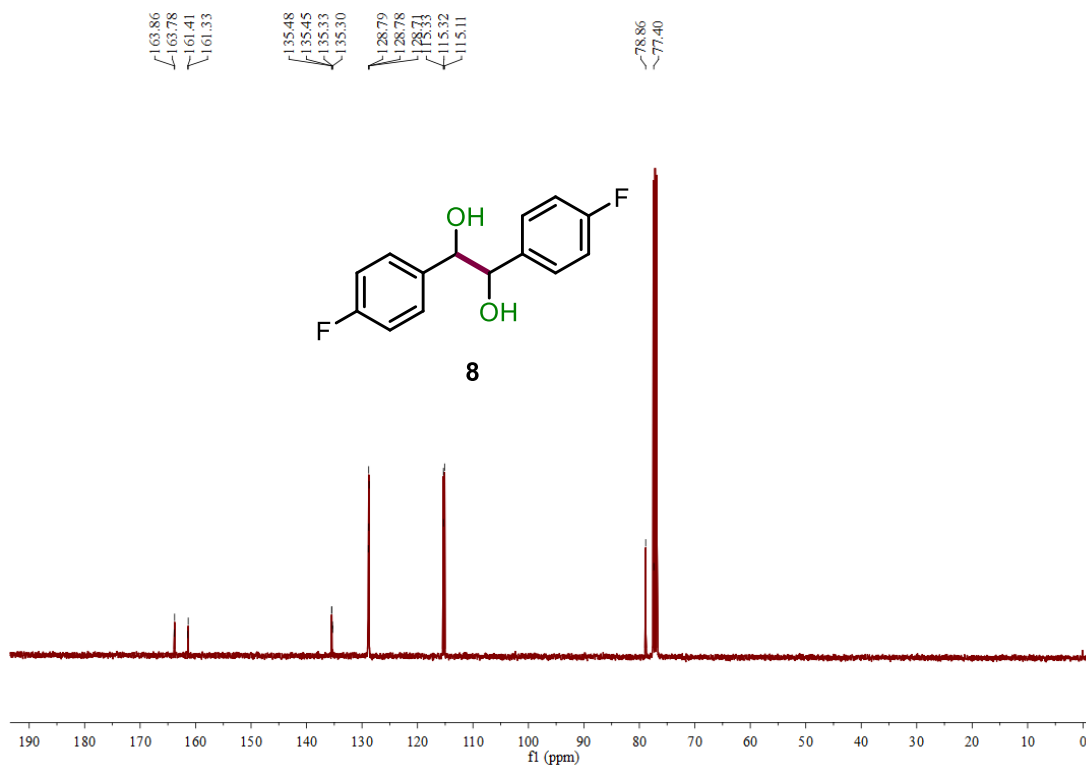

**<sup>19</sup>F NMR (376 MHz, CDCl<sub>3</sub>) spectrum of compound 8**

114.00  
114.05

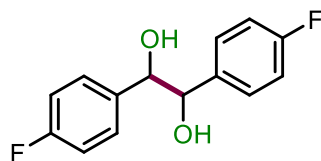

**8**

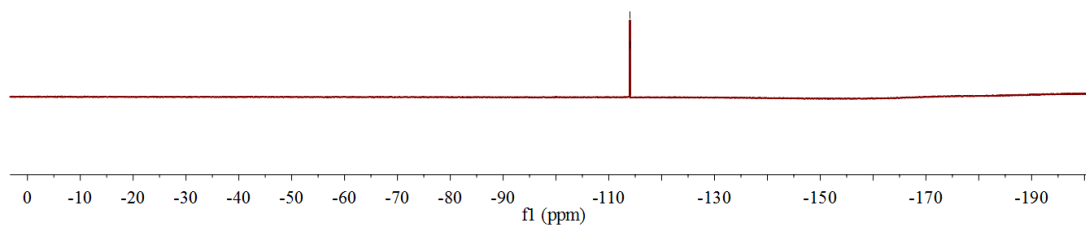

**<sup>1</sup>H NMR (400 MHz, CDCl<sub>3</sub>) spectrum of compound 9**

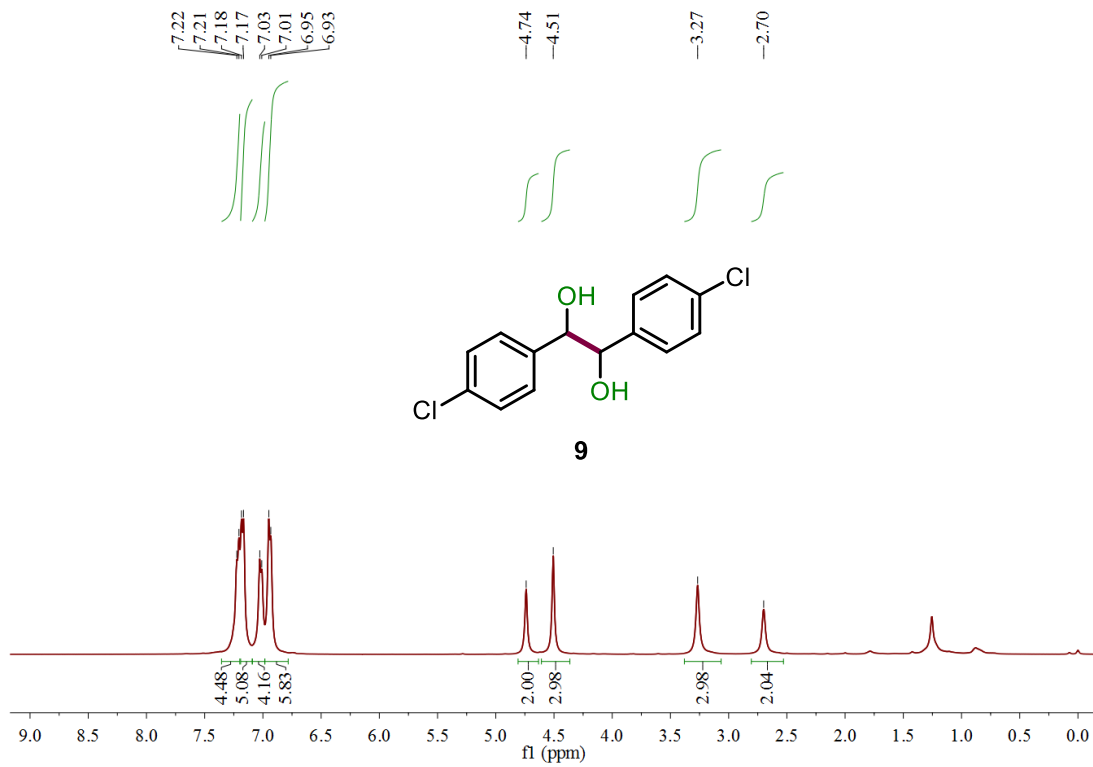

**<sup>13</sup>C NMR (100 MHz, CDCl<sub>3</sub>) spectrum of compound 9**

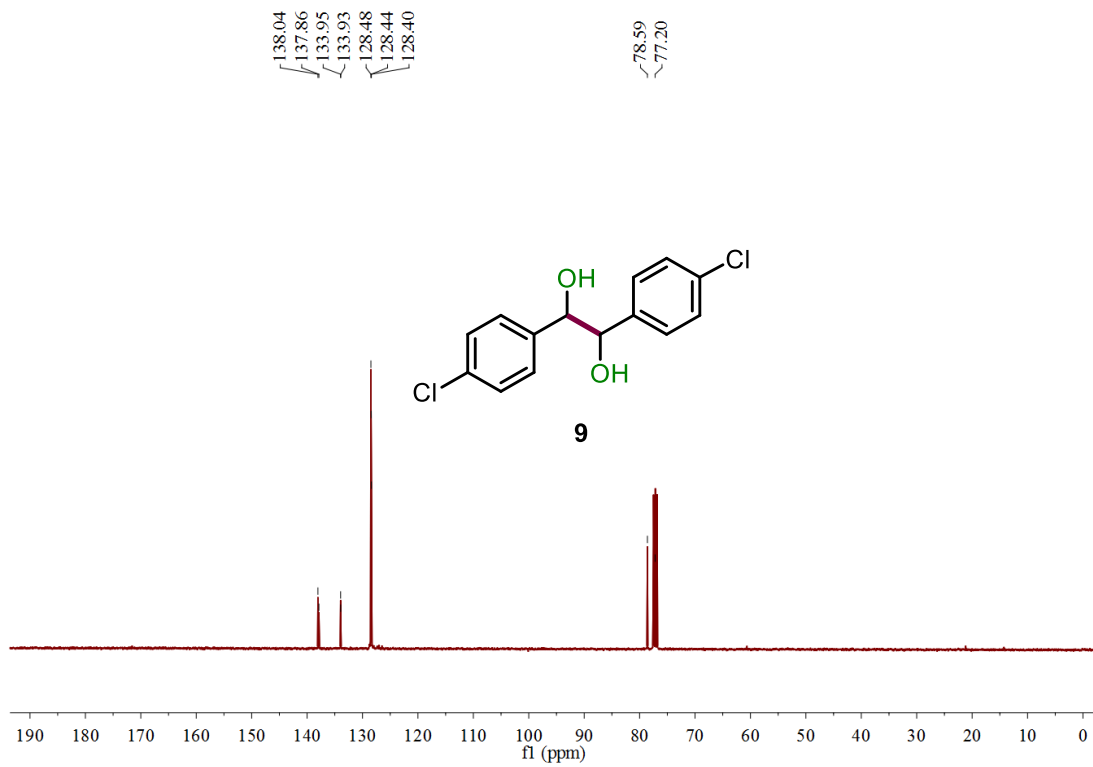

**<sup>1</sup>H NMR (400 MHz, CDCl<sub>3</sub>) spectrum of compound 10**

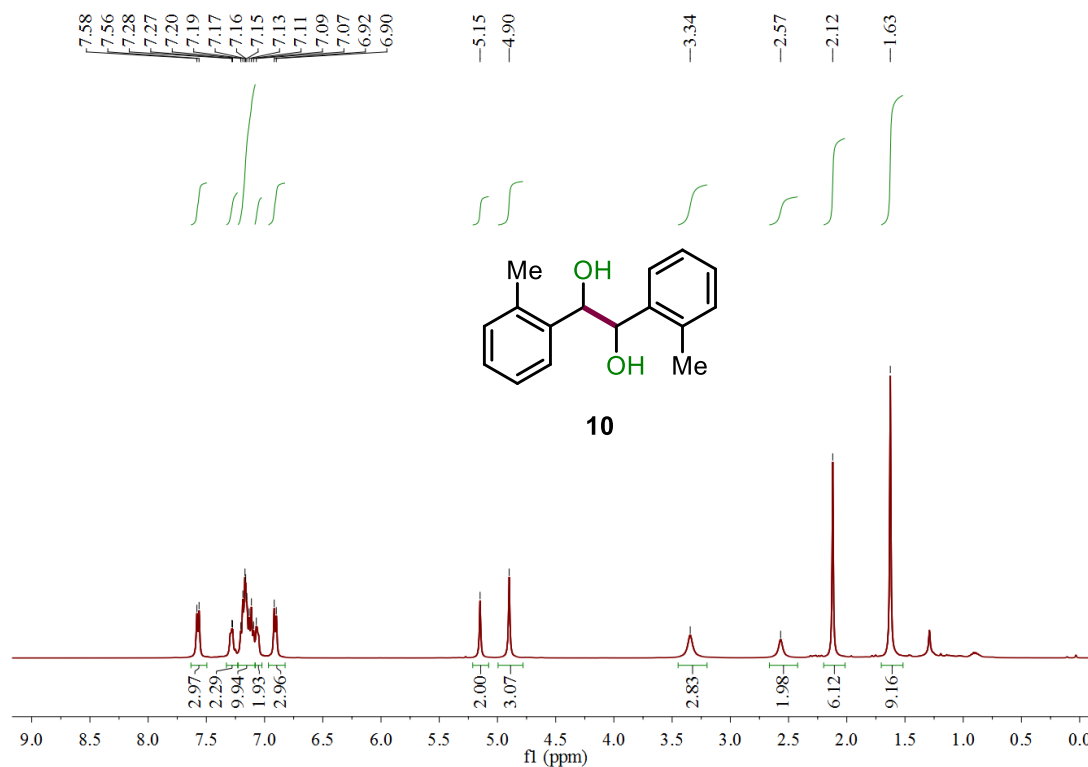

**<sup>13</sup>C NMR (100 MHz, CDCl<sub>3</sub>) spectrum of compound 10**

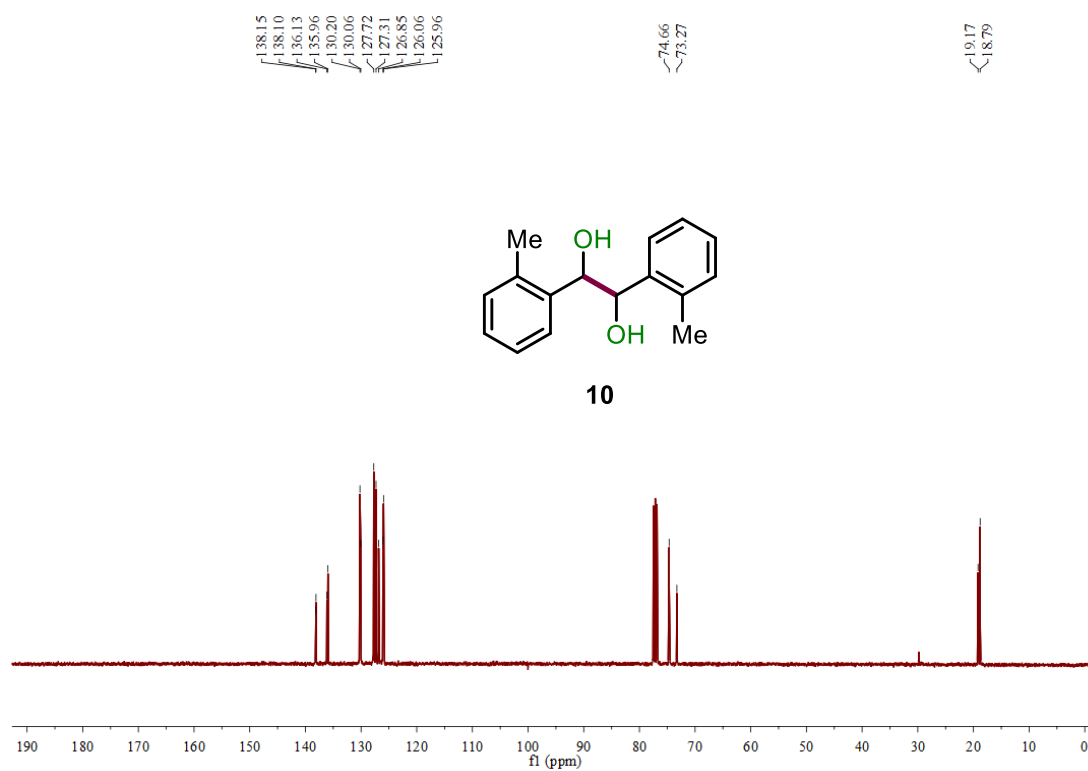

**<sup>1</sup>H NMR (400 MHz, CDCl<sub>3</sub>) spectrum of compound 11**

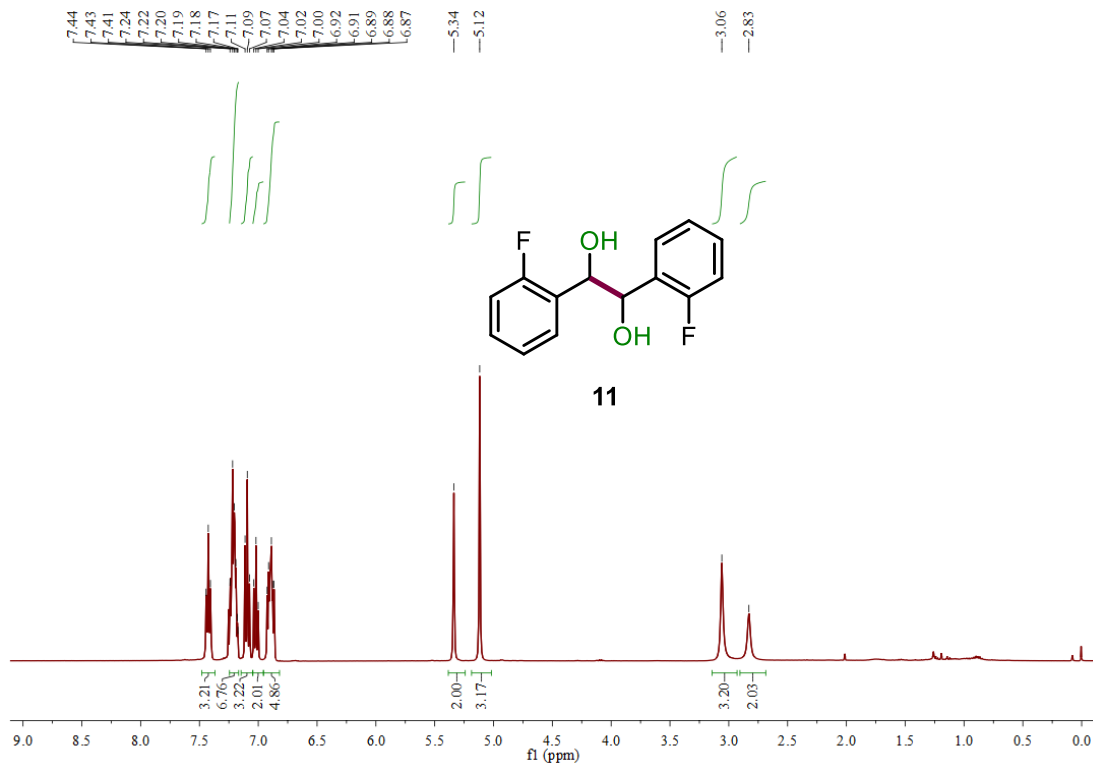

**<sup>13</sup>C NMR (100 MHz, CDCl<sub>3</sub>) spectrum of compound 11**

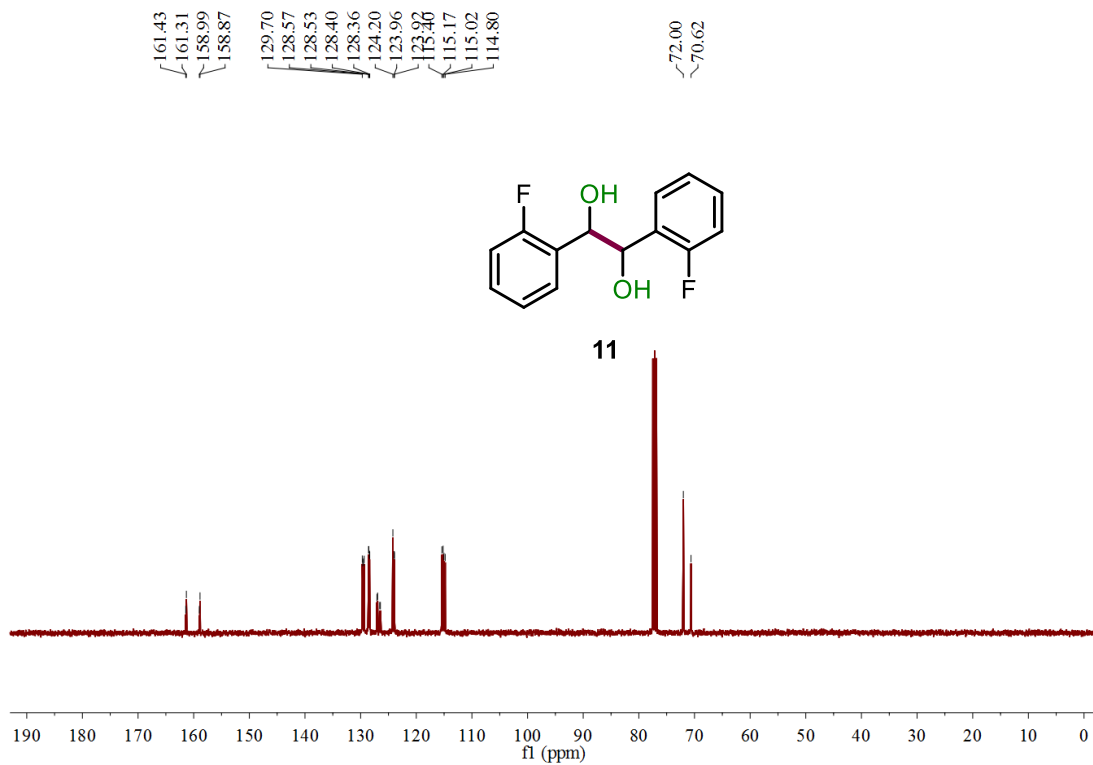

**$^{19}\text{F}$  NMR (376 MHz,  $\text{CDCl}_3$ ) spectrum of compound 11**

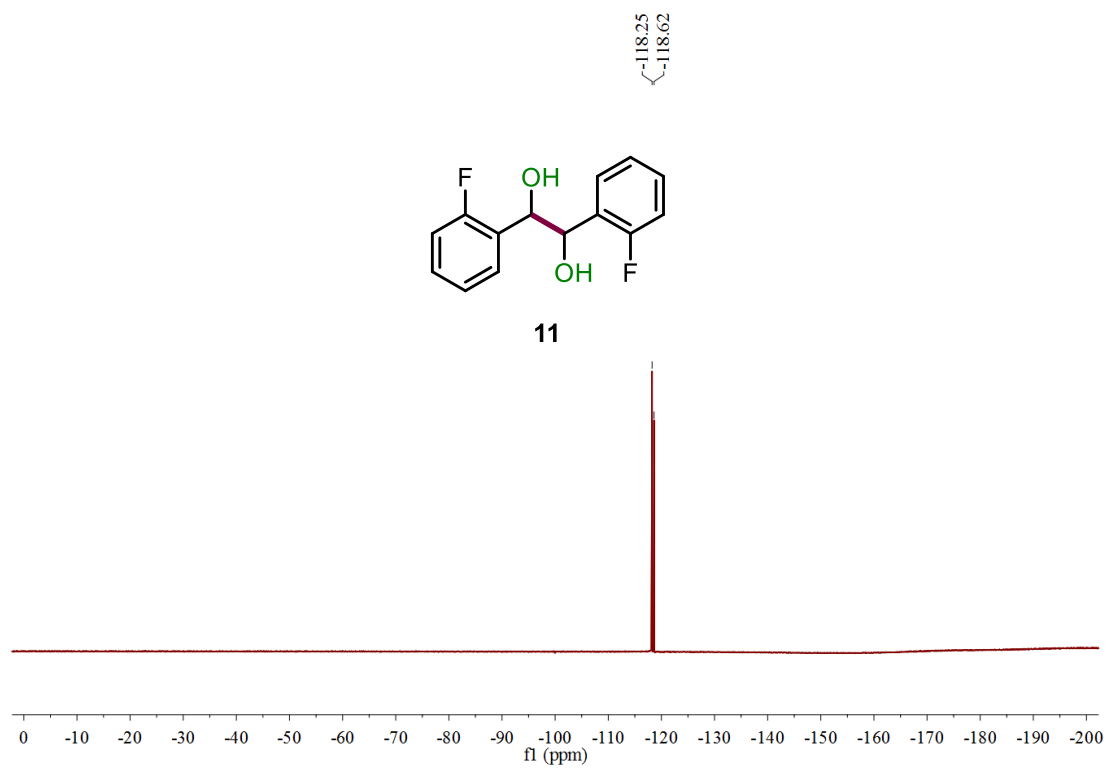

### <sup>1</sup>H NMR (400 MHz, CDCl<sub>3</sub>) spectrum of compound 12

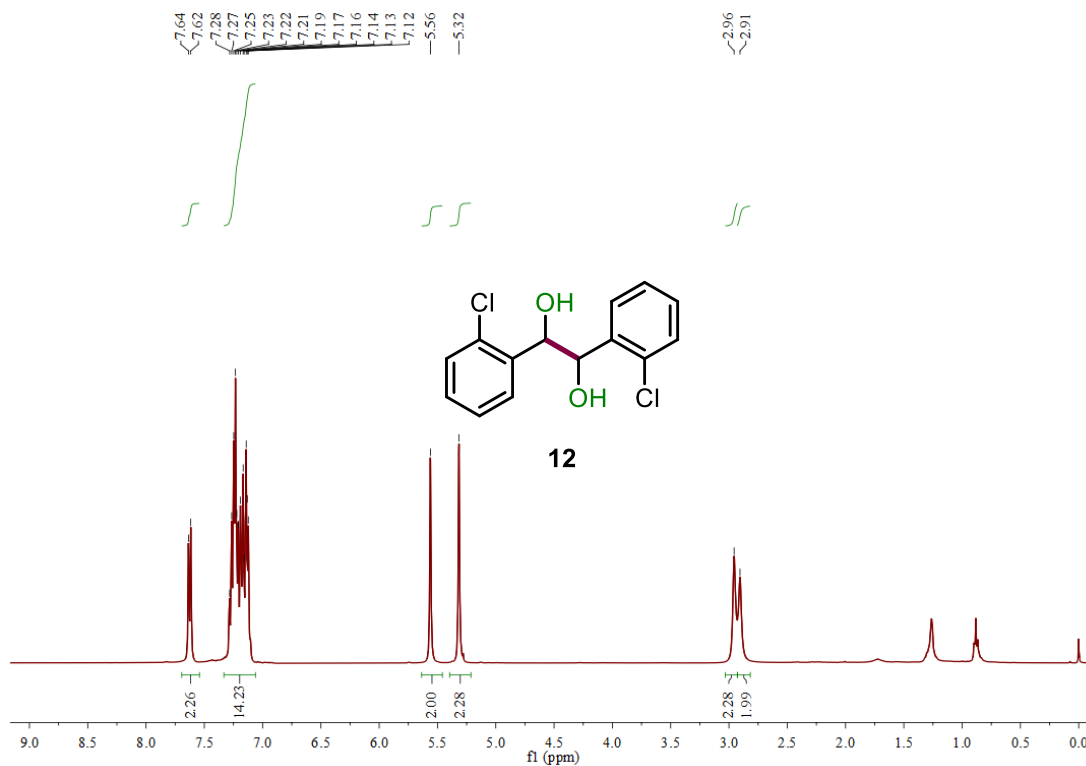

### <sup>13</sup>C NMR (100 MHz, CDCl<sub>3</sub>) spectrum of compound 12

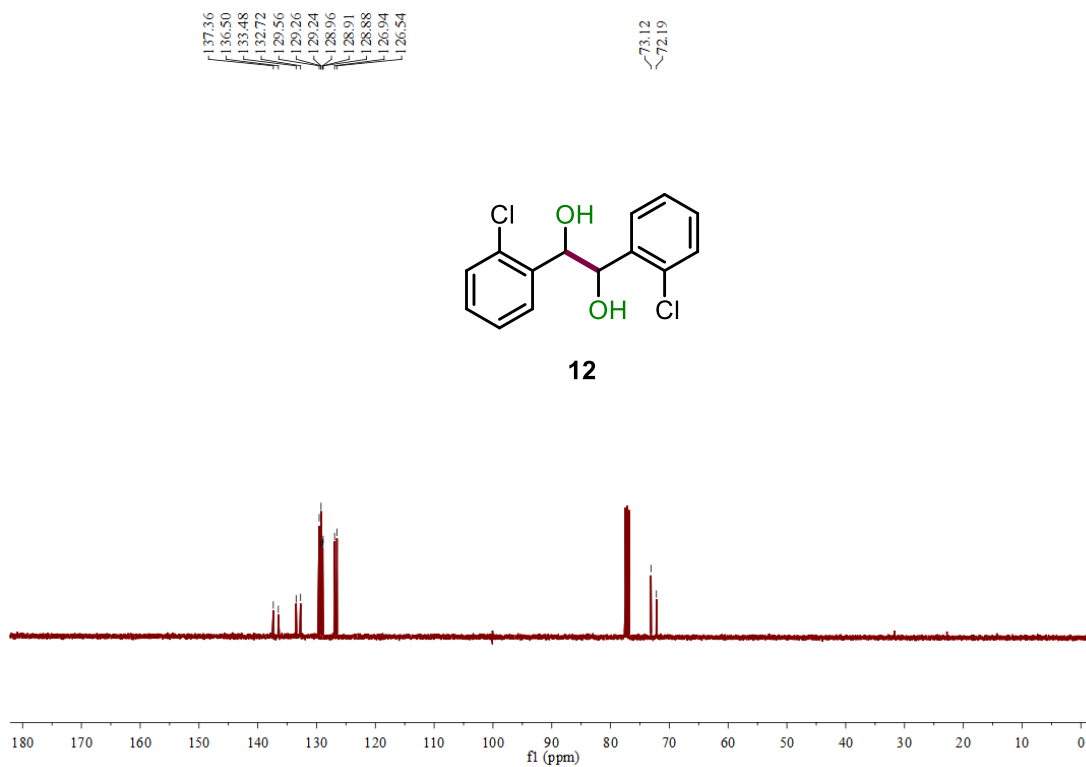



**<sup>1</sup>H NMR (400 MHz, CDCl<sub>3</sub>) spectrum of compound 13**

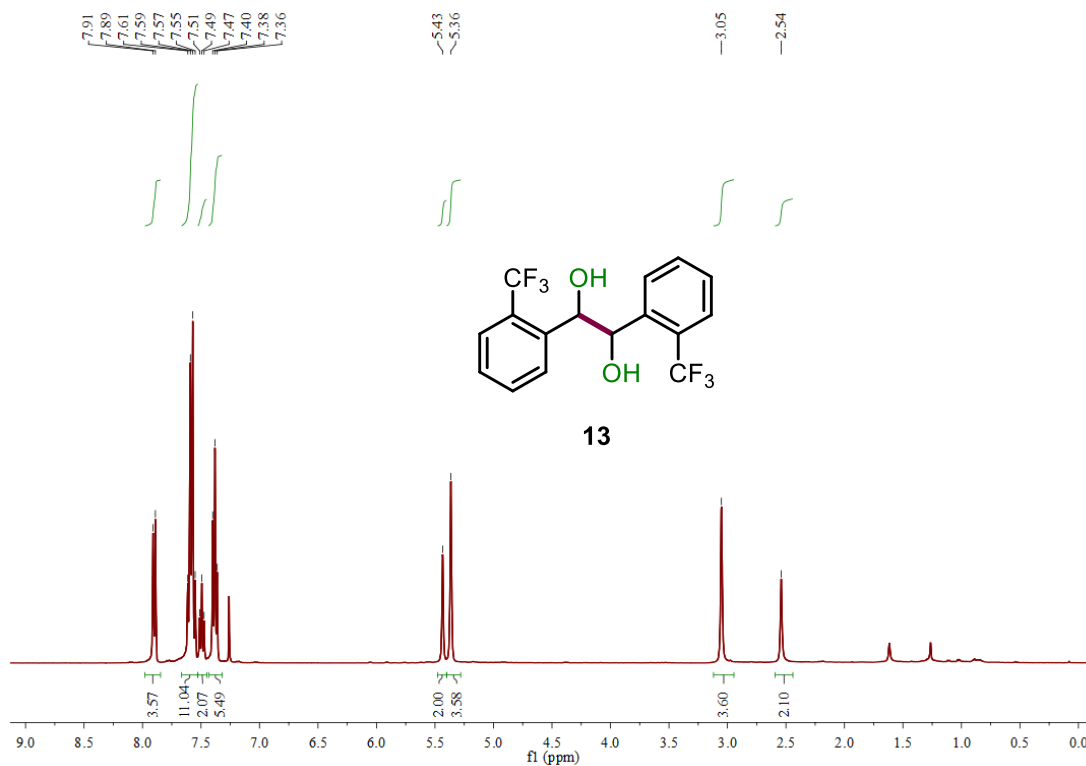

**<sup>13</sup>C NMR (100 MHz, CDCl<sub>3</sub>) spectrum of compound 13**

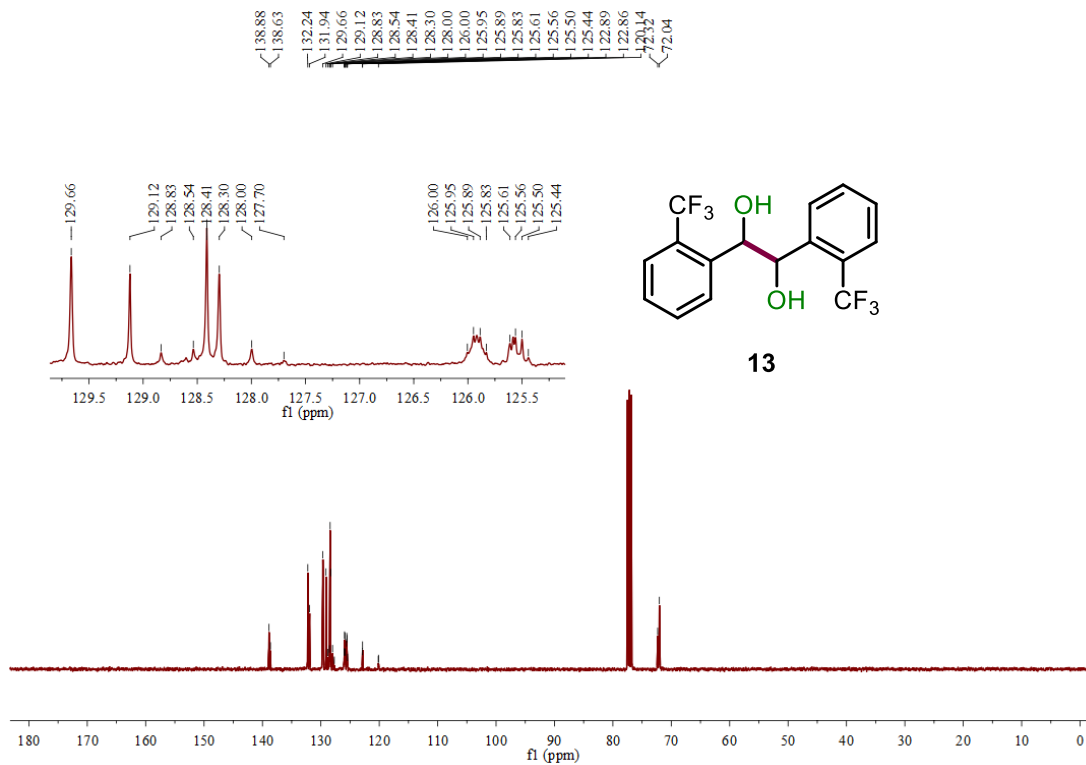

**$^{19}\text{F}$  NMR (376 MHz,  $\text{CDCl}_3$ ) spectrum of compound 13**

-57.64  
-57.65

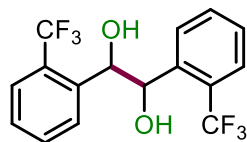

**13**

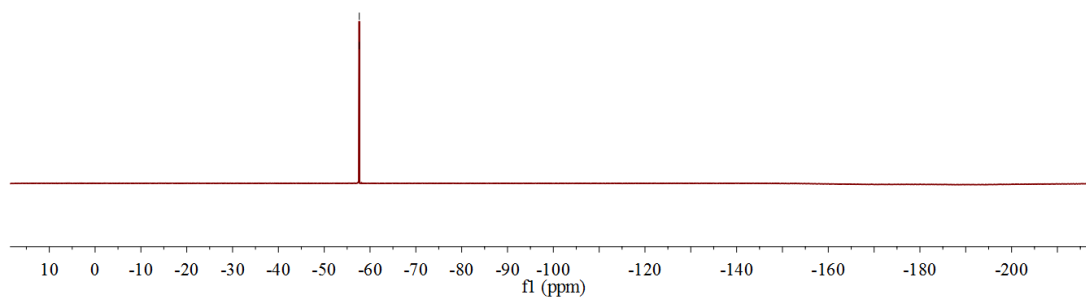

**<sup>1</sup>H NMR (400 MHz, CDCl<sub>3</sub>) spectrum of compound 14**

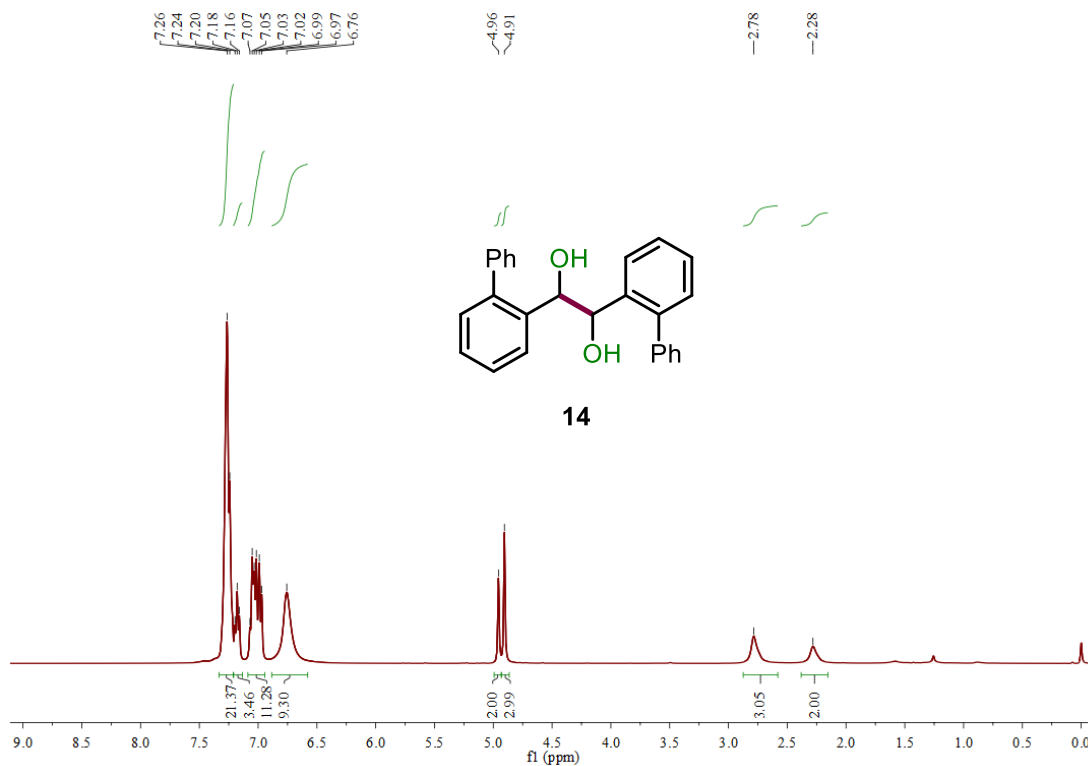

**<sup>13</sup>C NMR (100 MHz, CDCl<sub>3</sub>) spectrum of compound 14**

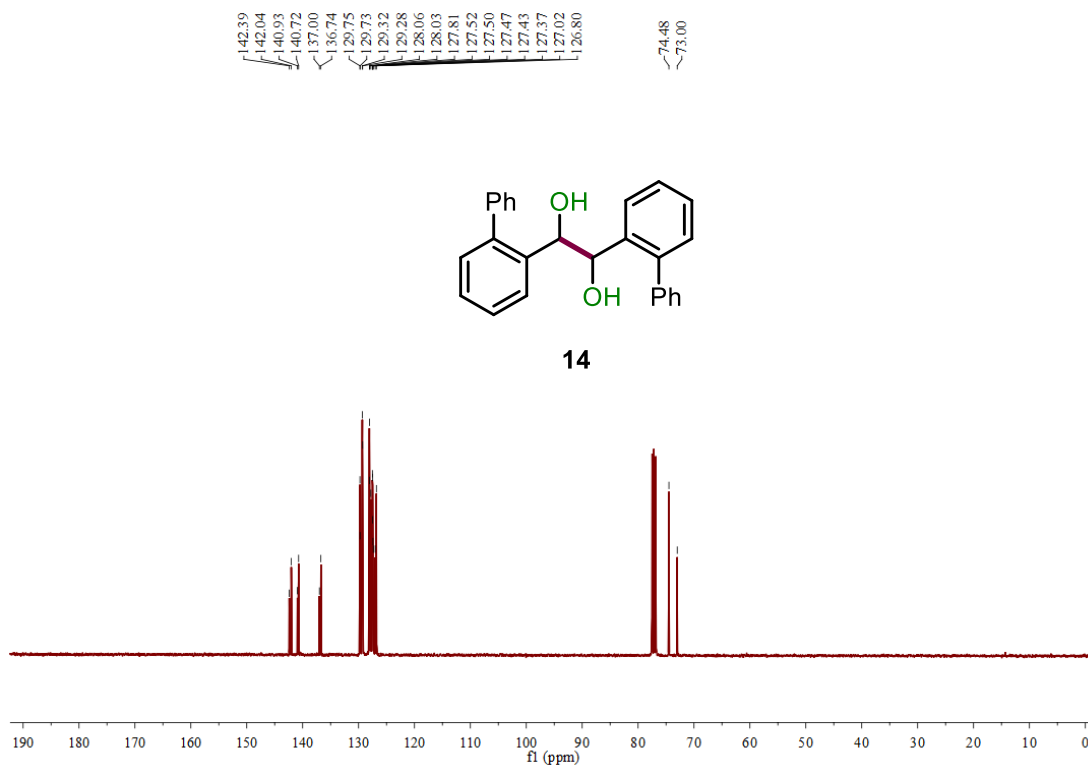

**<sup>1</sup>H NMR (400 MHz, CDCl<sub>3</sub>) spectrum of compound 15**

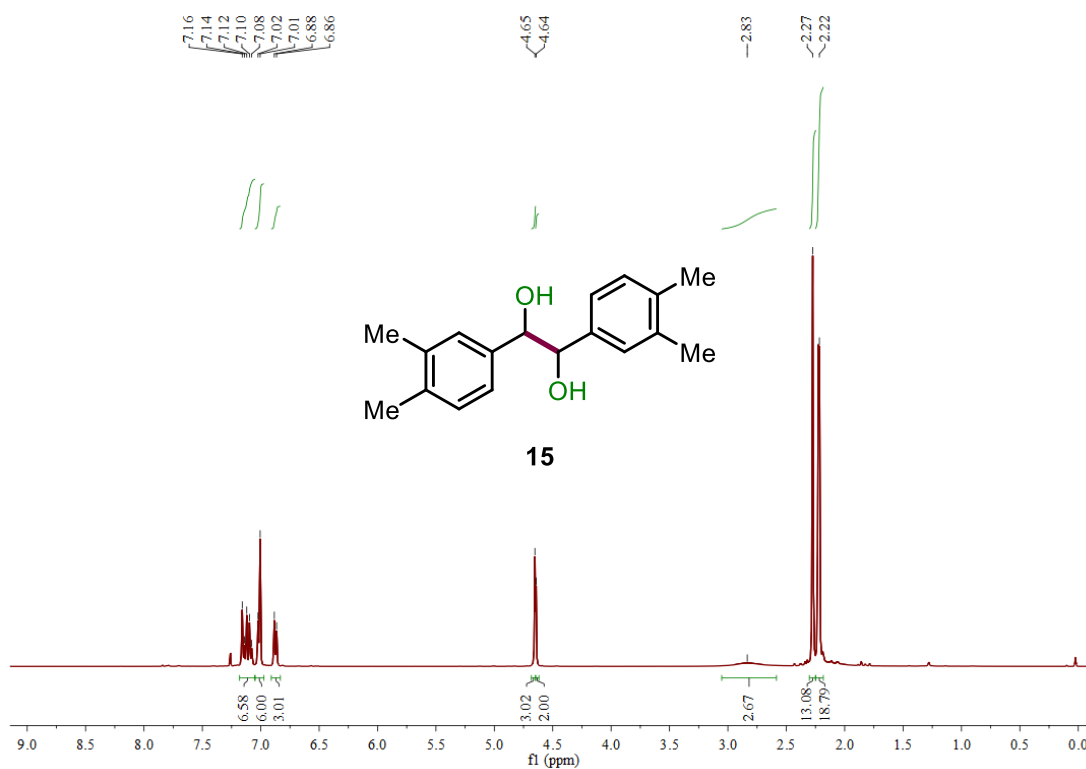

**<sup>13</sup>C NMR (100 MHz, CDCl<sub>3</sub>) spectrum of compound 15**

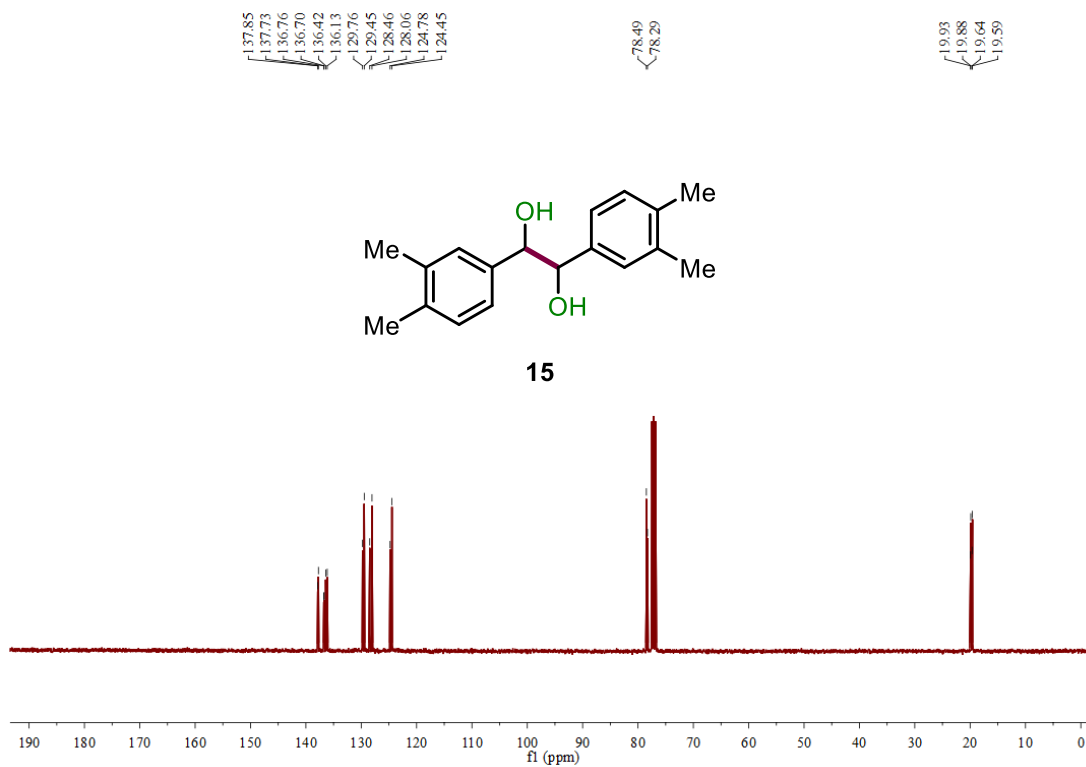

**<sup>1</sup>H NMR (400 MHz, DMSO-*d*<sub>6</sub>) spectrum of compound 16**

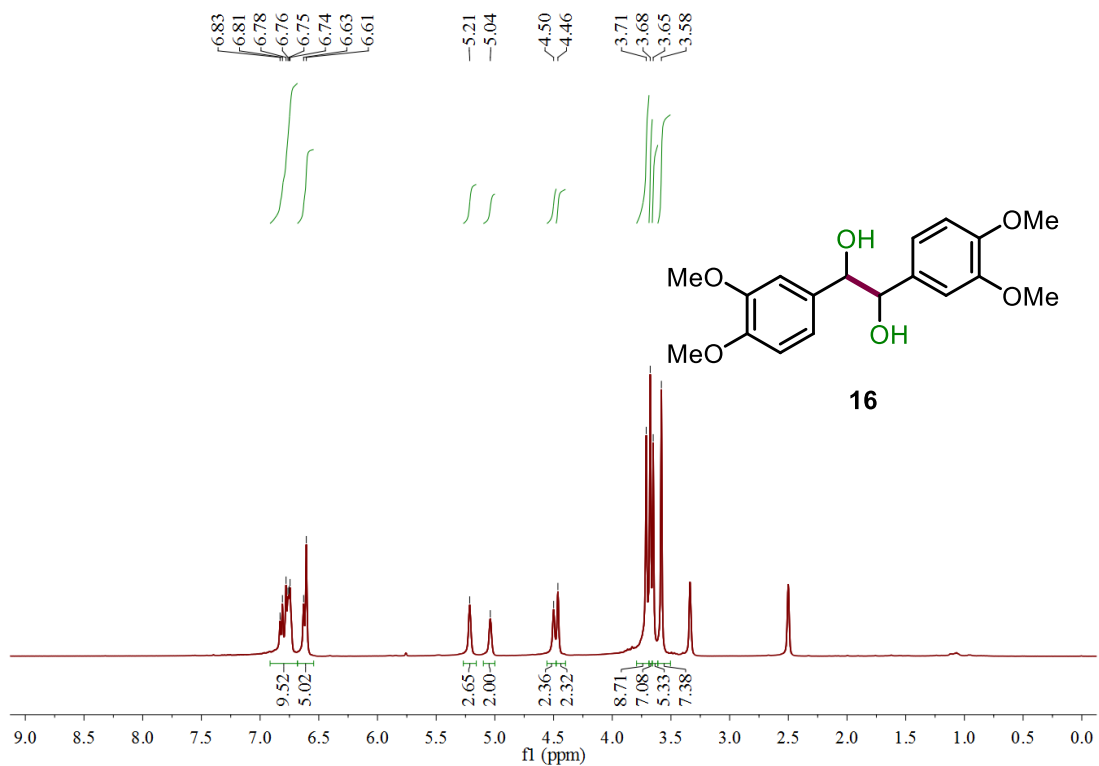

**<sup>13</sup>C NMR (100 MHz, DMSO-*d*<sub>6</sub>) spectrum of compound 16**

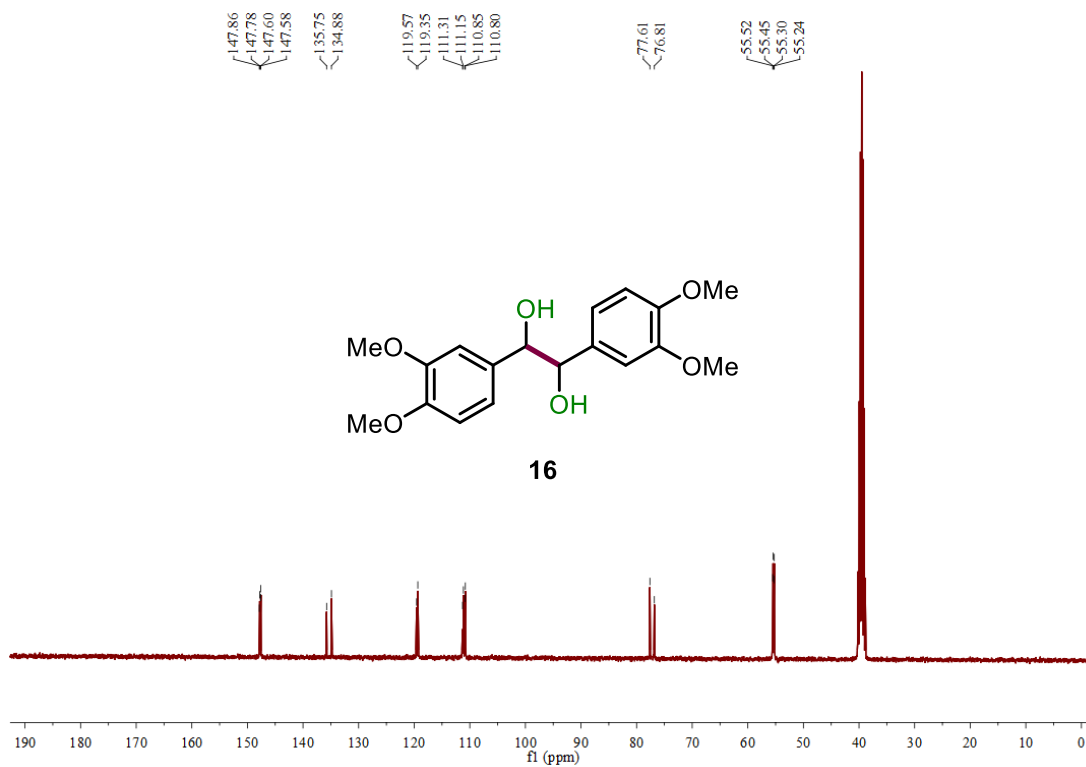

**<sup>1</sup>H NMR (400 MHz, CDCl<sub>3</sub>) spectrum of compound 17**

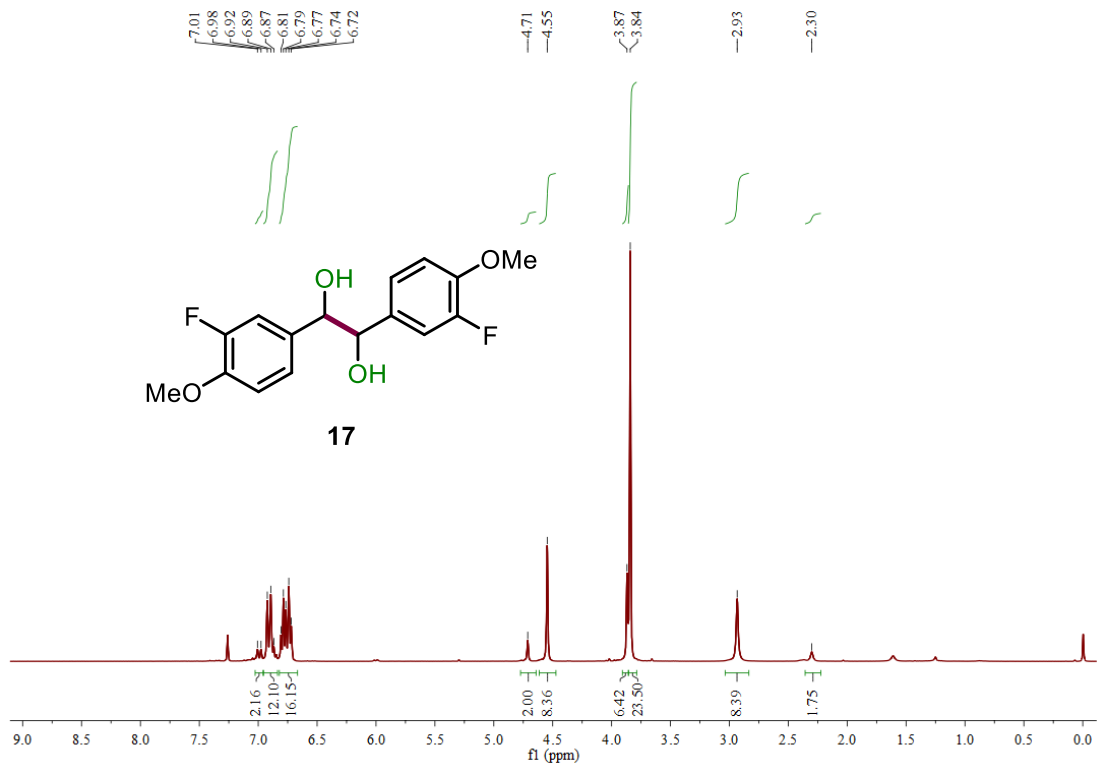

**<sup>13</sup>C NMR (100 MHz, CDCl<sub>3</sub>) spectrum of compound 17**

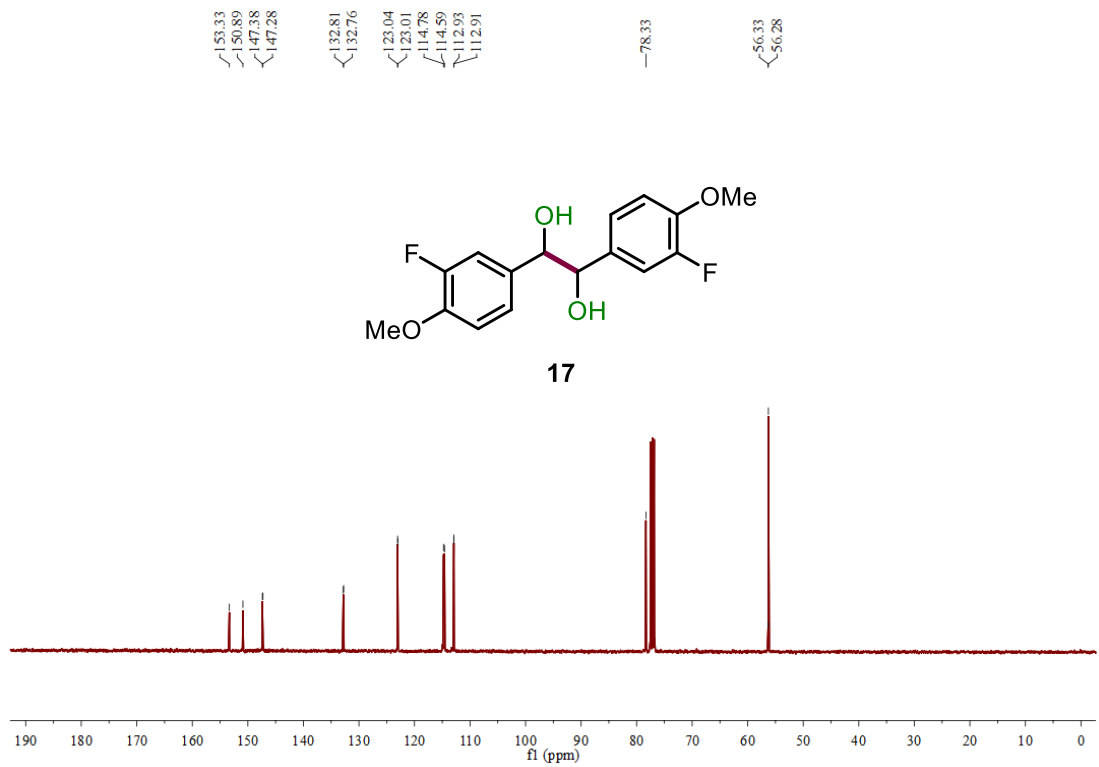

**<sup>19</sup>F NMR (376 MHz, CDCl<sub>3</sub>) spectrum of compound 17**

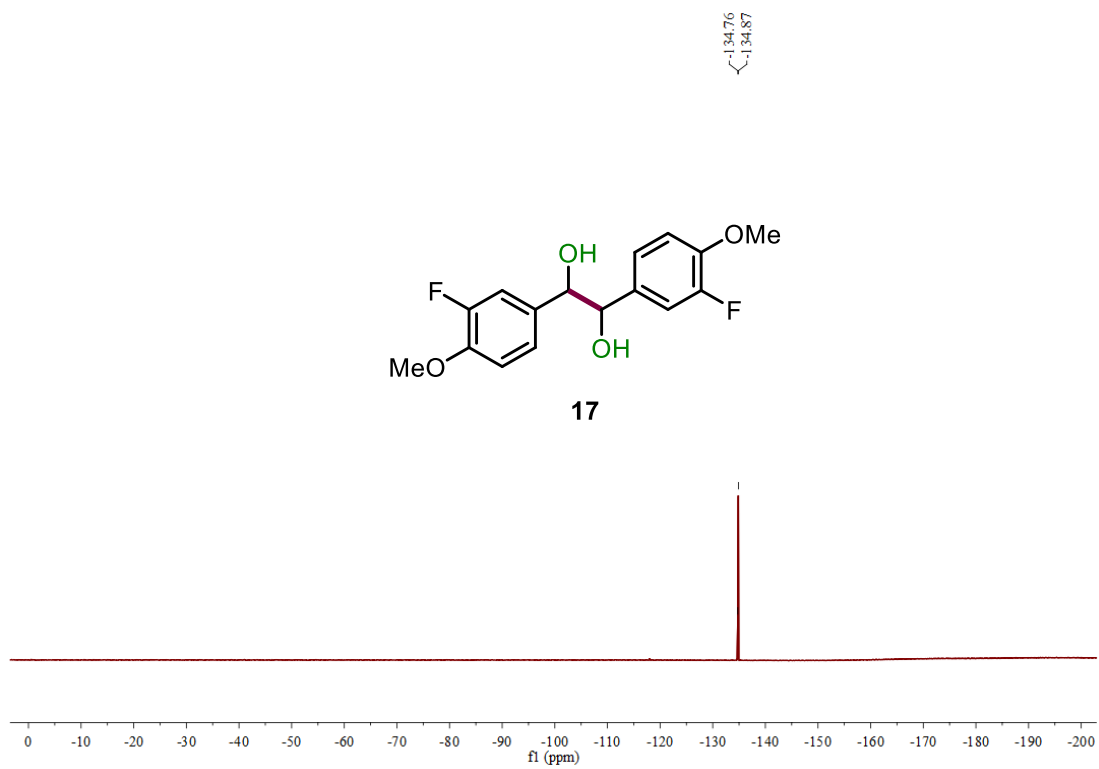

**<sup>1</sup>H NMR (400 MHz, CDCl<sub>3</sub>) spectrum of compound 18**

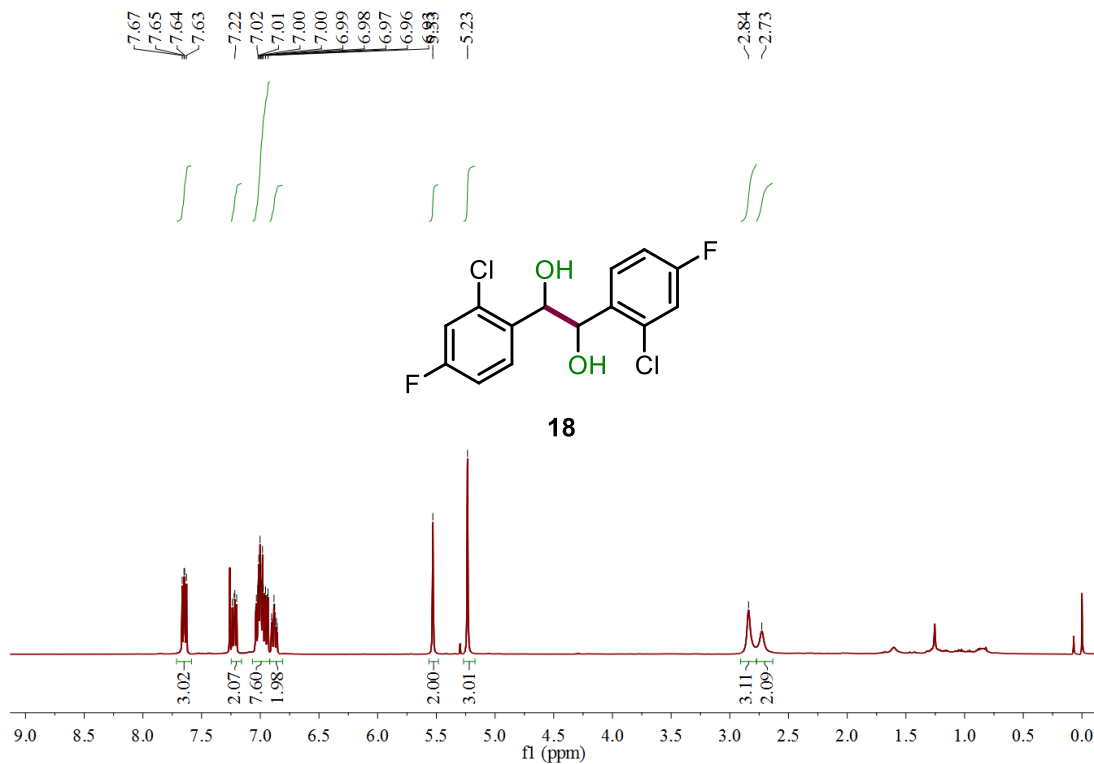

**<sup>13</sup>C NMR (100 MHz, CDCl<sub>3</sub>) spectrum of compound 18**

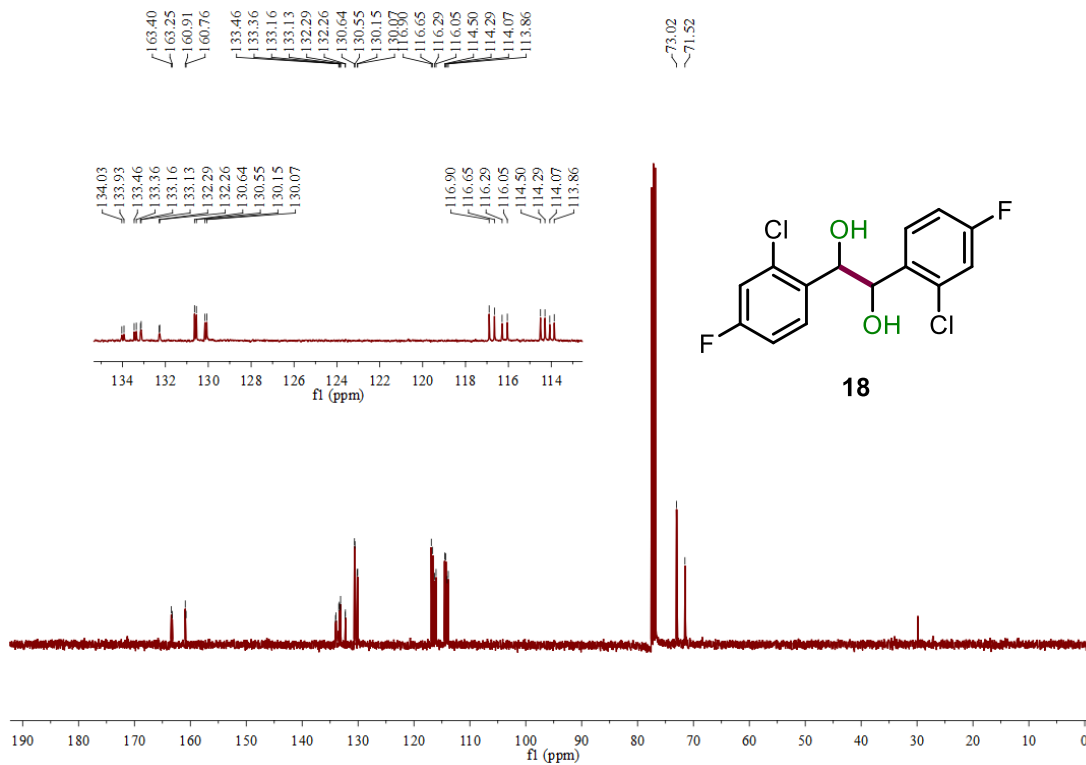



**<sup>19</sup>F NMR (376 MHz, CDCl<sub>3</sub>) spectrum of compound 18**

δ: -111.88  
δ: -112.30

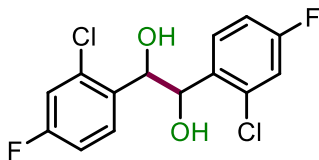

**18**

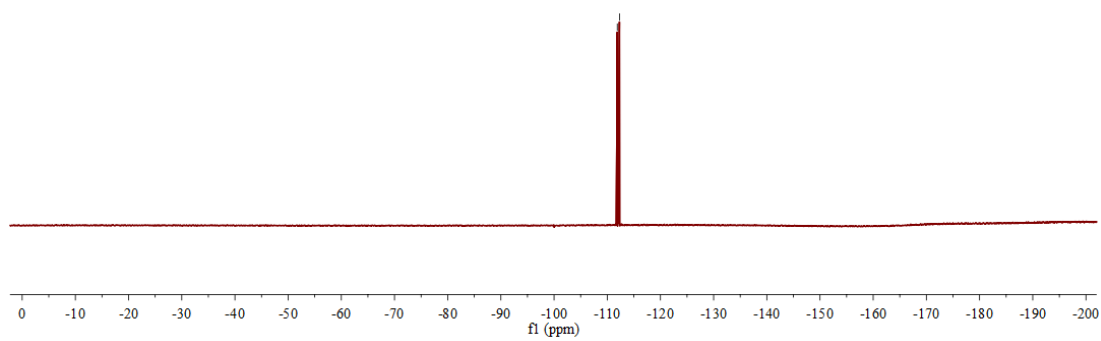

**<sup>1</sup>H NMR (400 MHz, CDCl<sub>3</sub>) spectrum of compound 19**

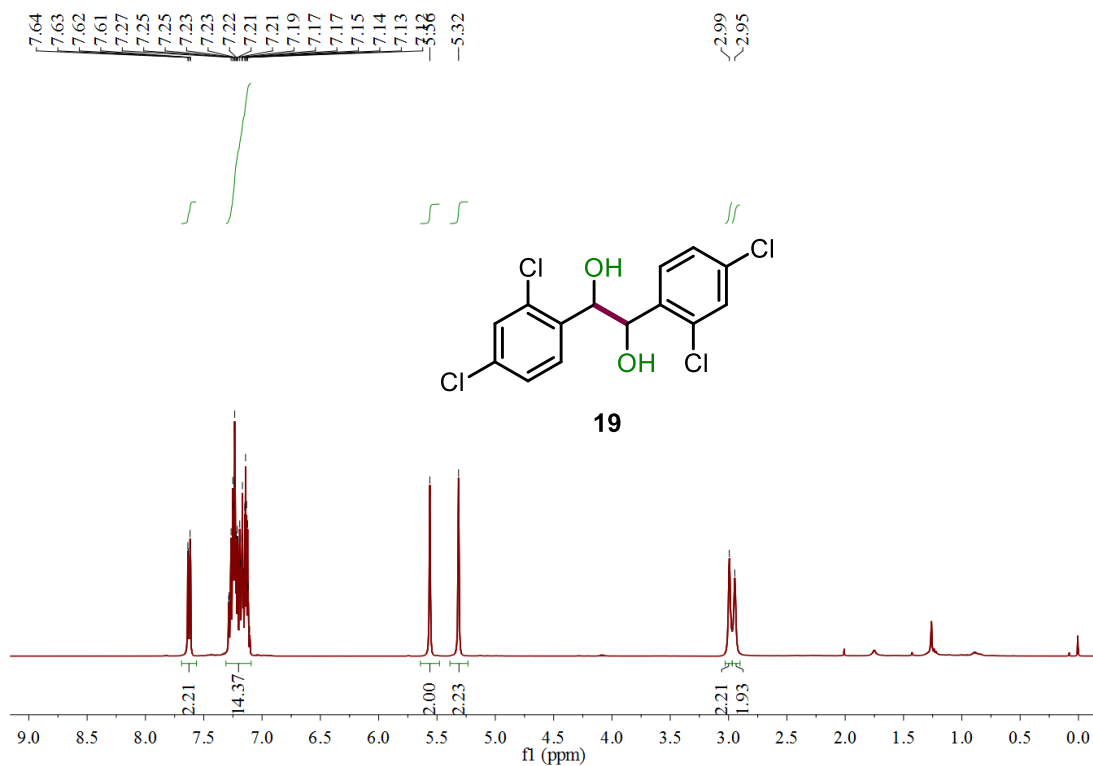

**<sup>13</sup>C NMR (100 MHz, CDCl<sub>3</sub>) spectrum of compound 19**

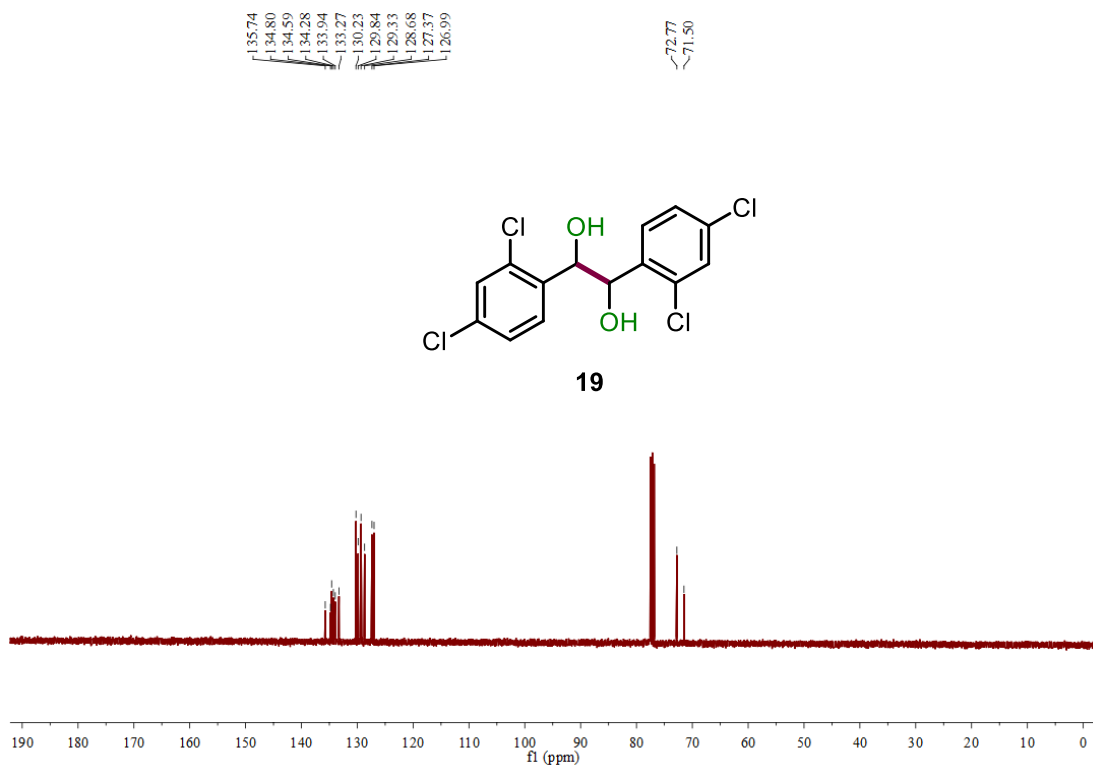

**<sup>1</sup>H NMR (400 MHz, CDCl<sub>3</sub>) spectrum of compound 20**

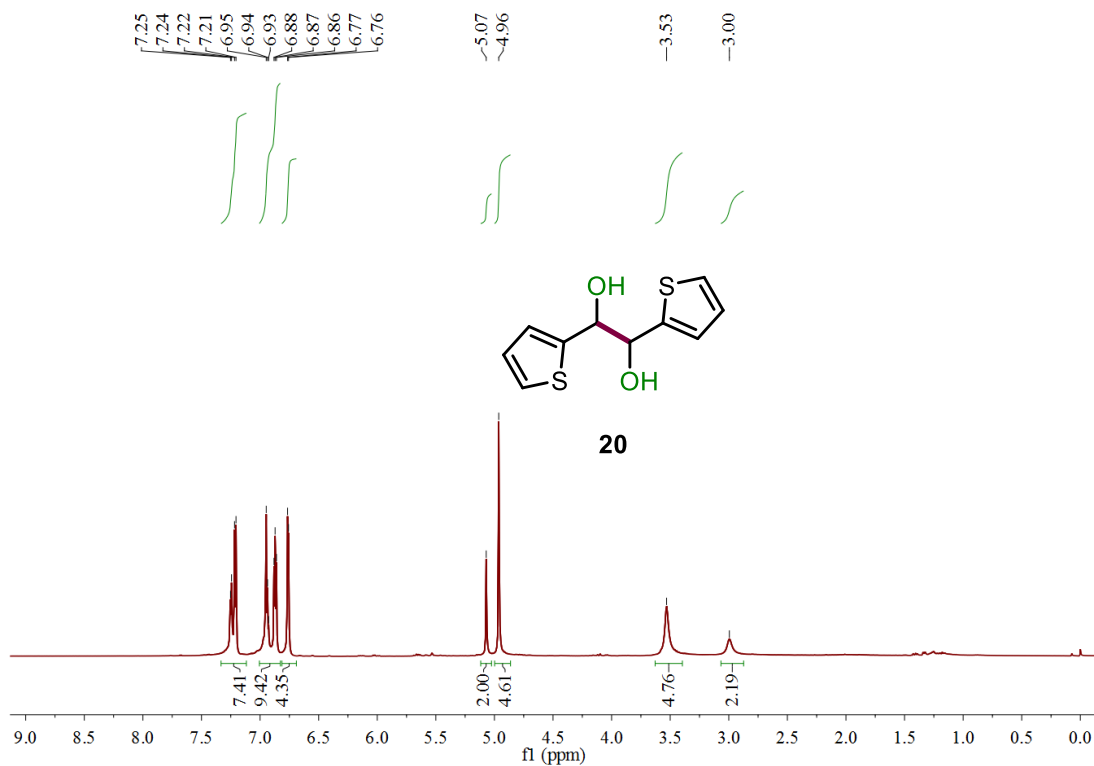

**<sup>13</sup>C NMR (100 MHz, CDCl<sub>3</sub>) spectrum of compound 20**

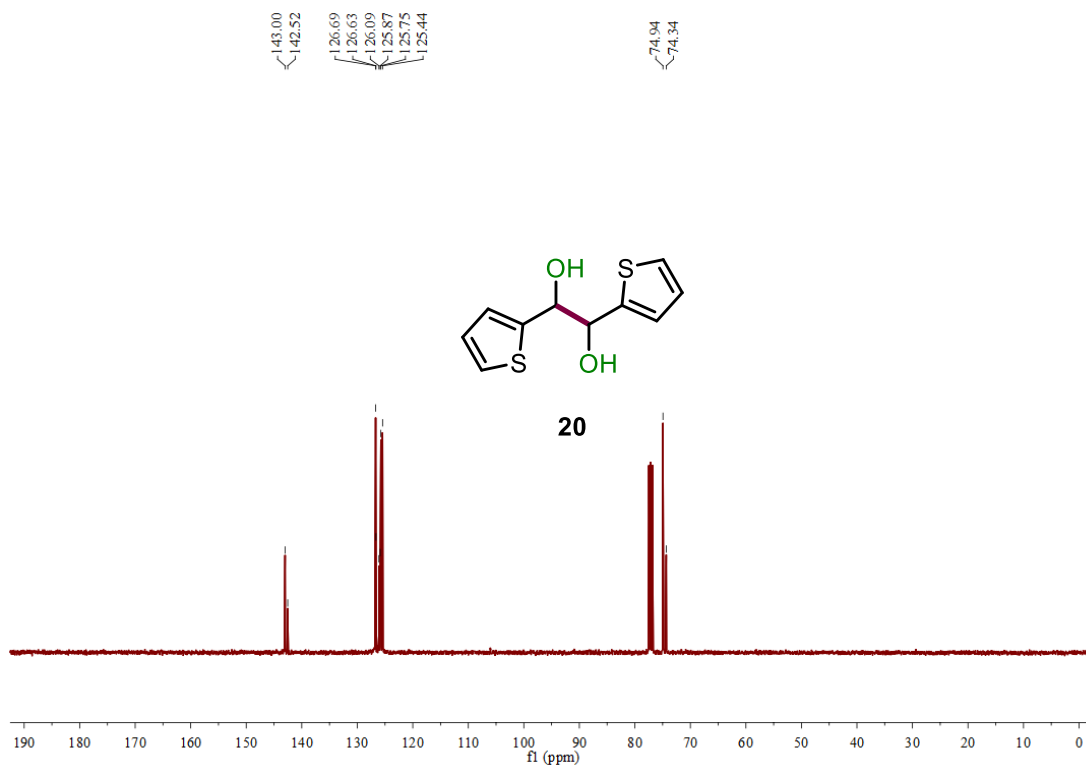

**<sup>1</sup>H NMR (400 MHz, CDCl<sub>3</sub>) spectrum of compound 21**

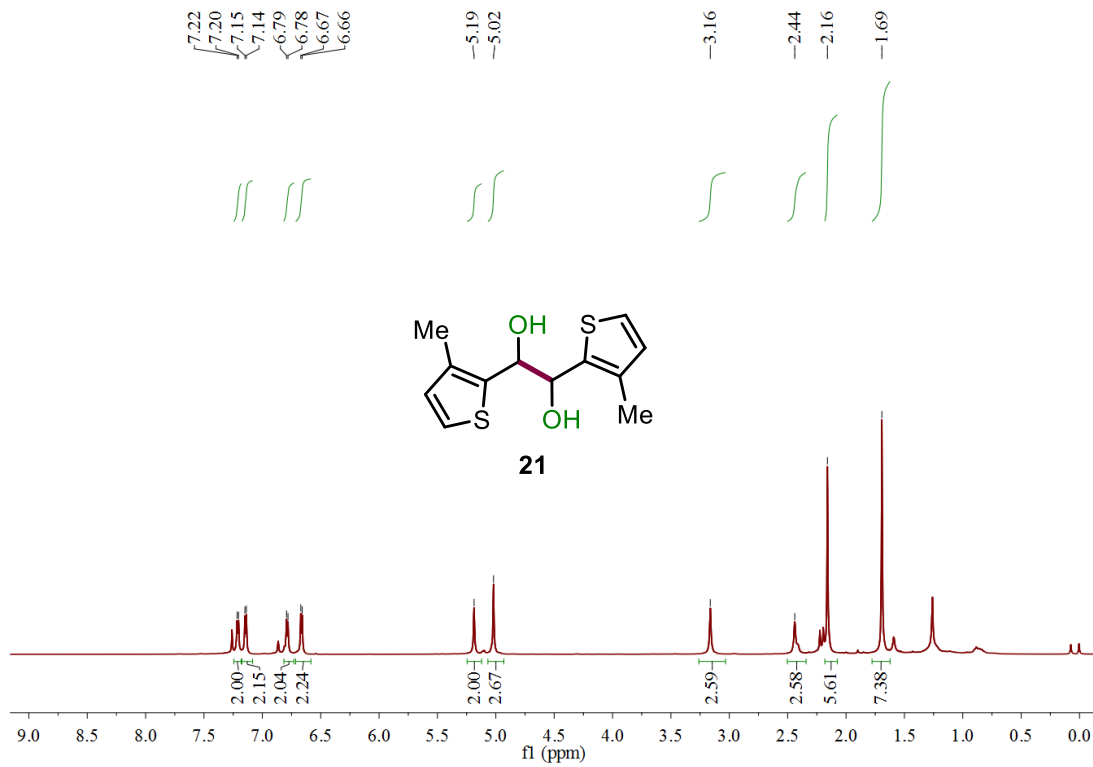

**<sup>13</sup>C NMR (100 MHz, CDCl<sub>3</sub>) spectrum of compound 21**

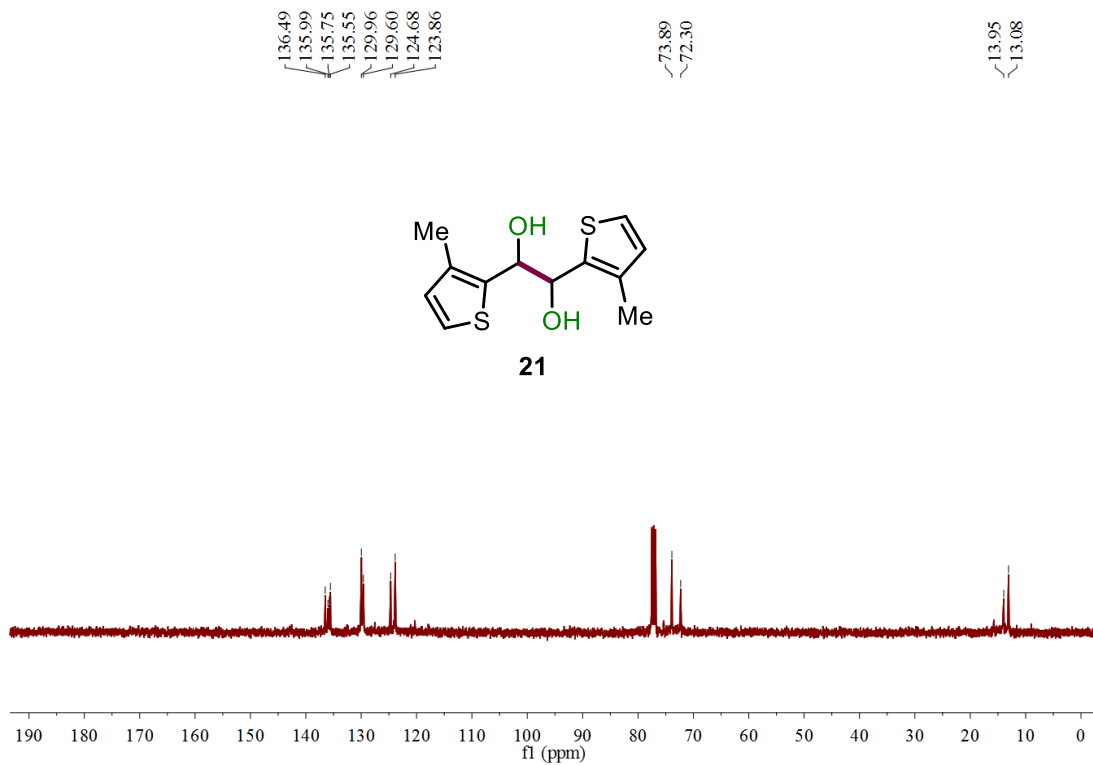

**<sup>1</sup>H NMR (400 MHz, CDCl<sub>3</sub>) spectrum of compound 22**

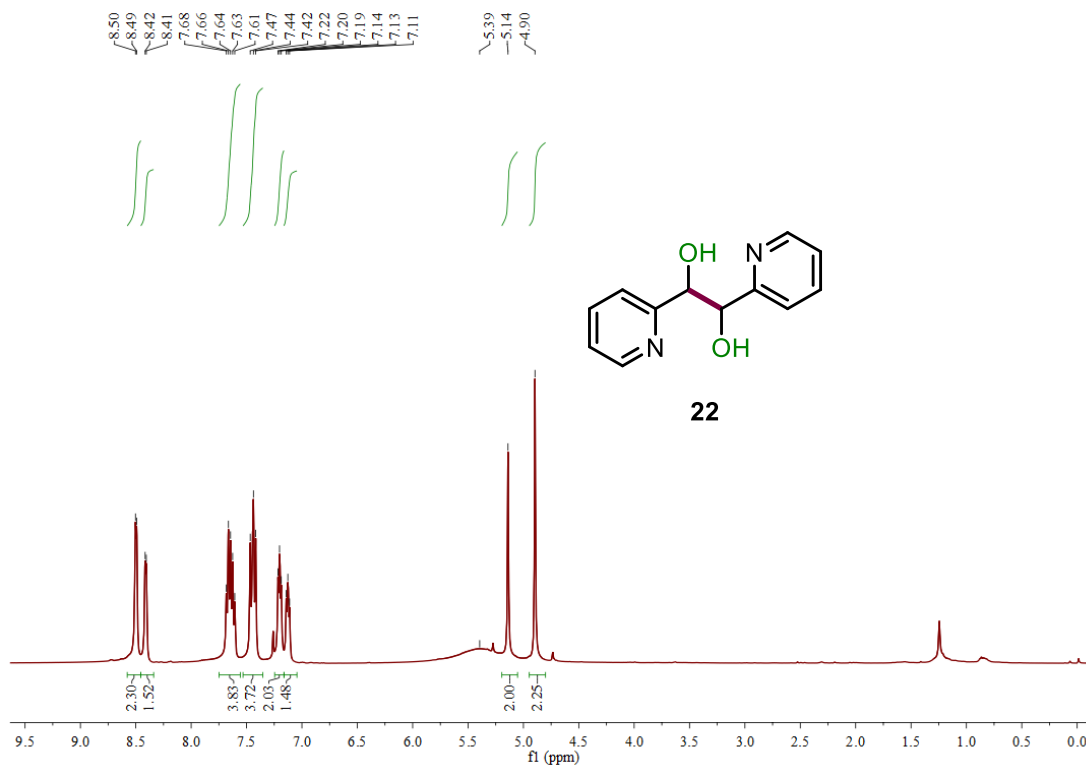

**<sup>13</sup>C NMR (100 MHz, CDCl<sub>3</sub>) spectrum of compound 22**

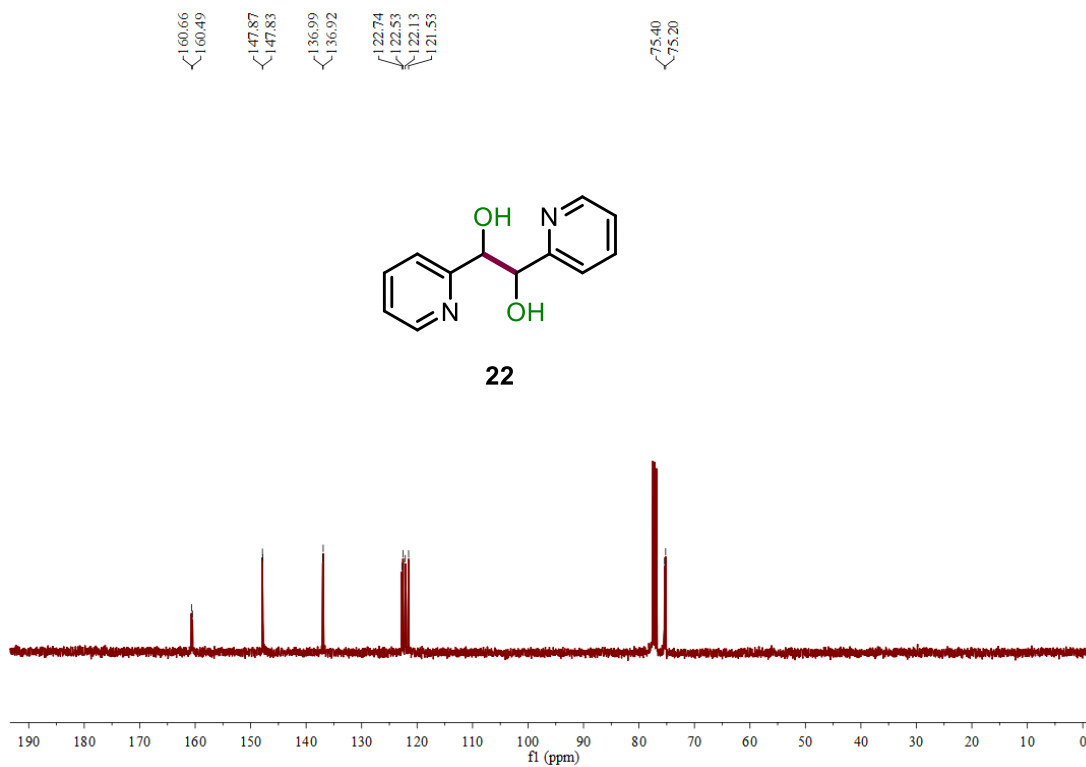

**<sup>1</sup>H NMR (400 MHz, DMSO-*d*<sub>6</sub>) spectrum of compound 23**

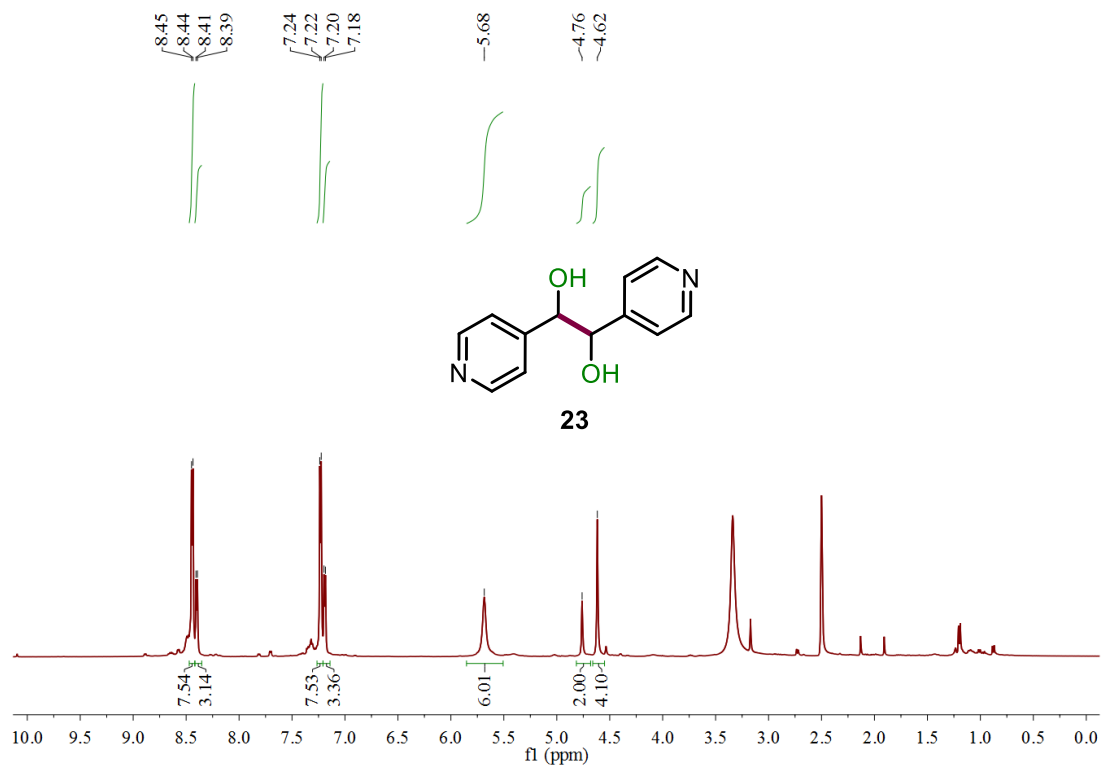

**<sup>13</sup>C NMR (100 MHz, DMSO-*d*<sub>6</sub>) spectrum of compound 23**

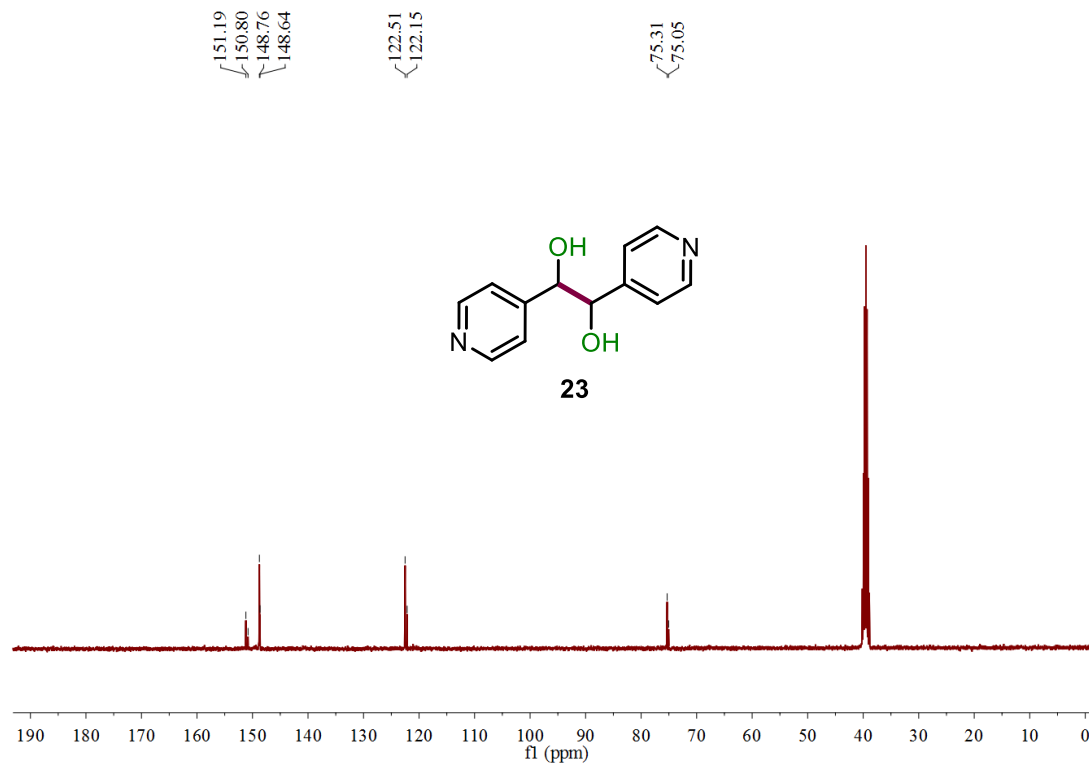

**<sup>1</sup>H NMR (400 MHz, CDCl<sub>3</sub>) spectrum of compound 24**

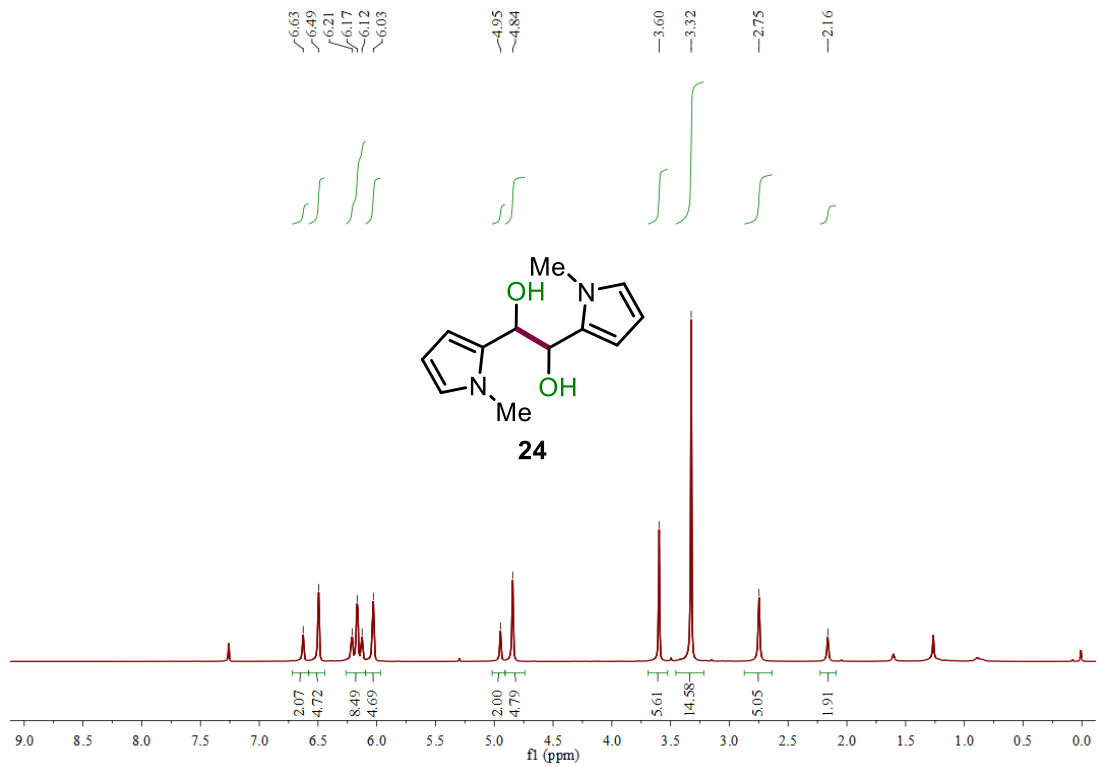

**<sup>13</sup>C NMR (100 MHz, CDCl<sub>3</sub>) spectrum of compound 24**

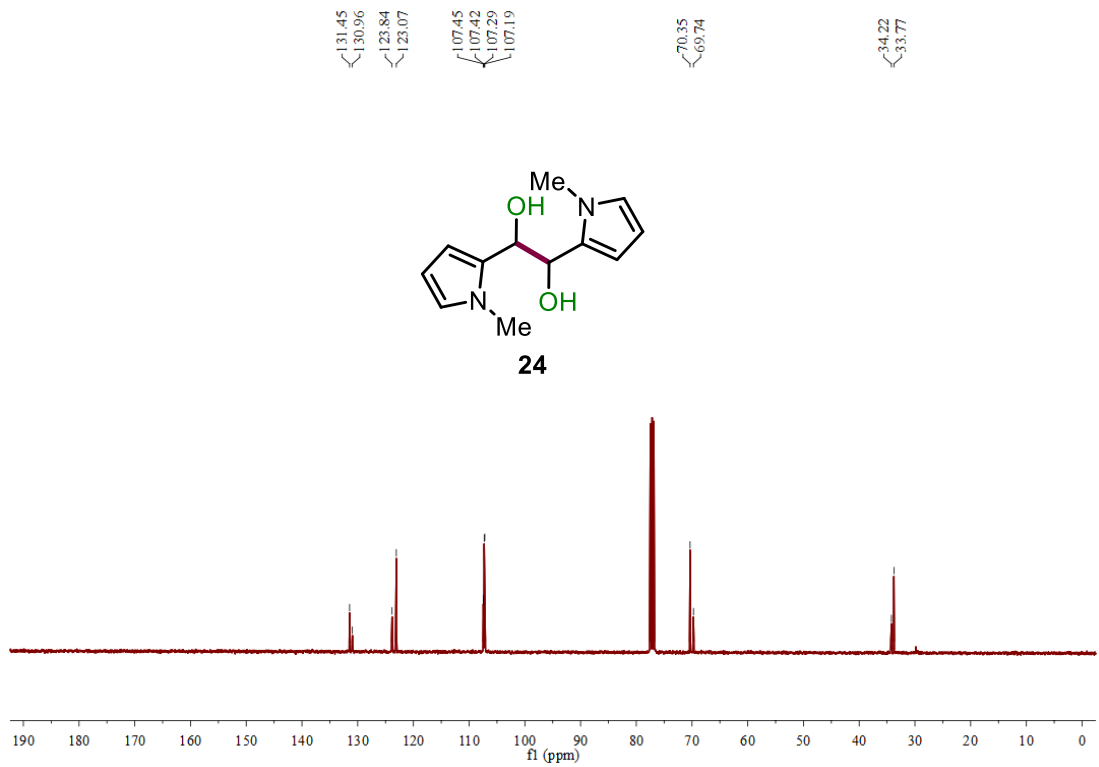

**<sup>1</sup>H NMR (400 MHz, CDCl<sub>3</sub>) spectrum of compound 25**

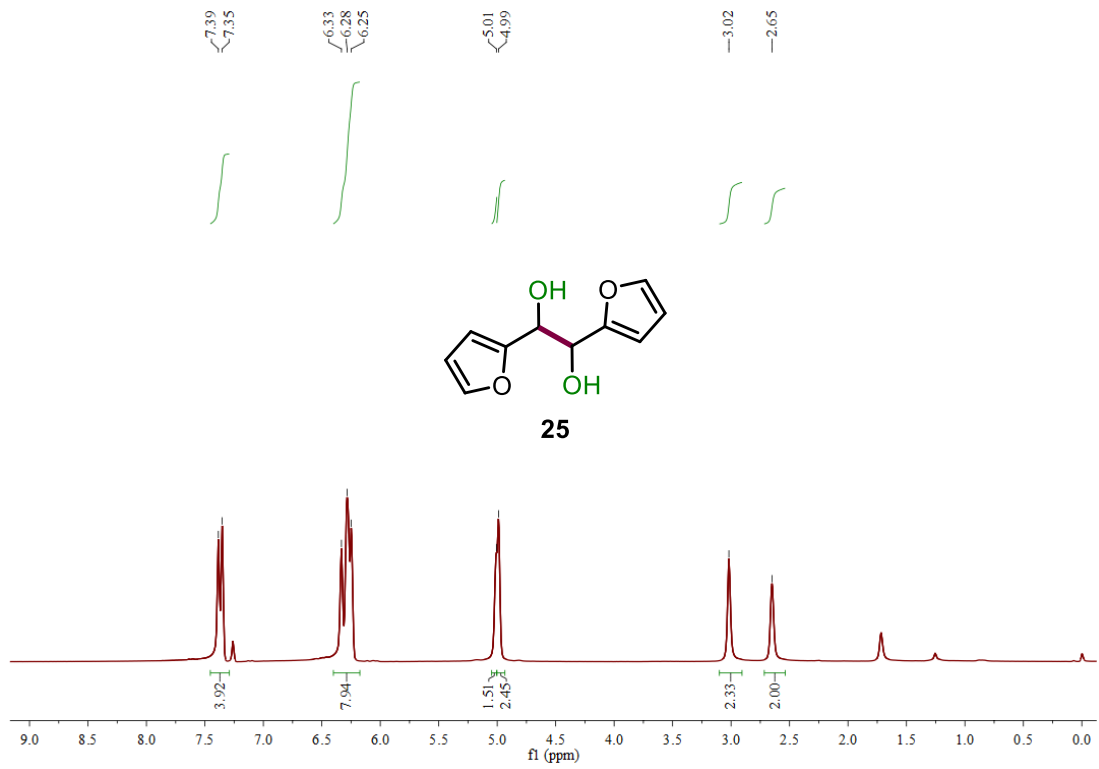

**<sup>13</sup>C NMR (100 MHz, CDCl<sub>3</sub>) spectrum of compound 25**

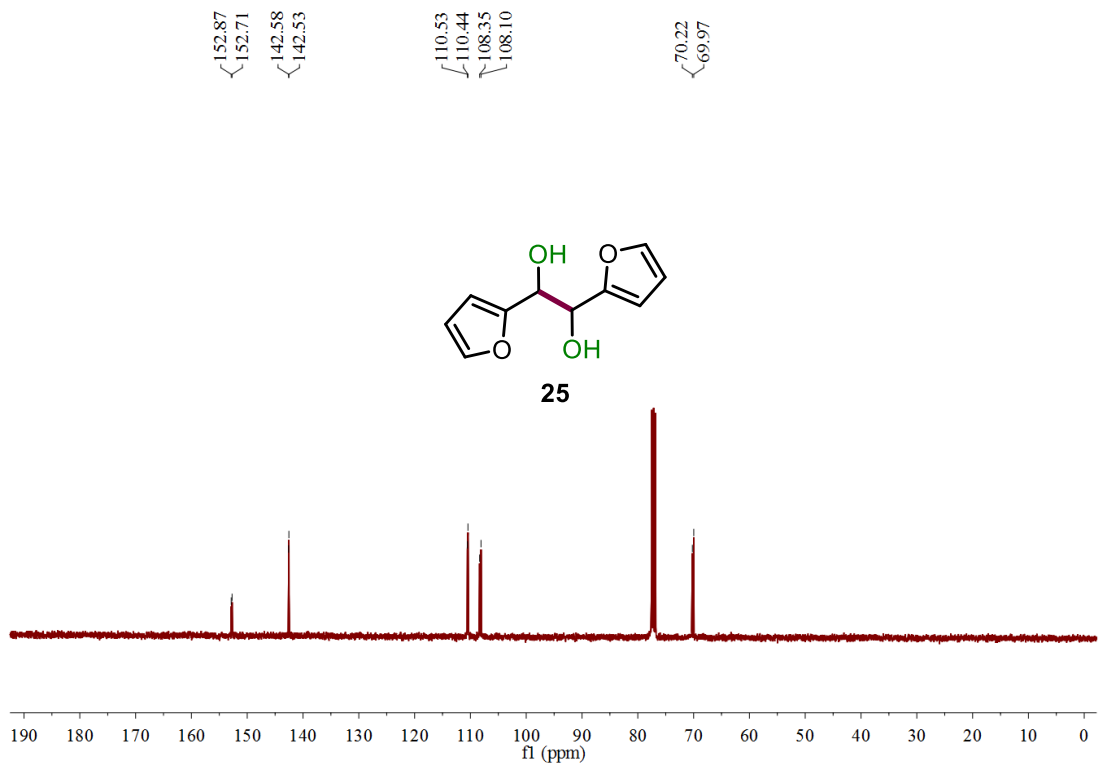



**<sup>1</sup>H NMR (400 MHz, CDCl<sub>3</sub>) spectrum of compound 26**

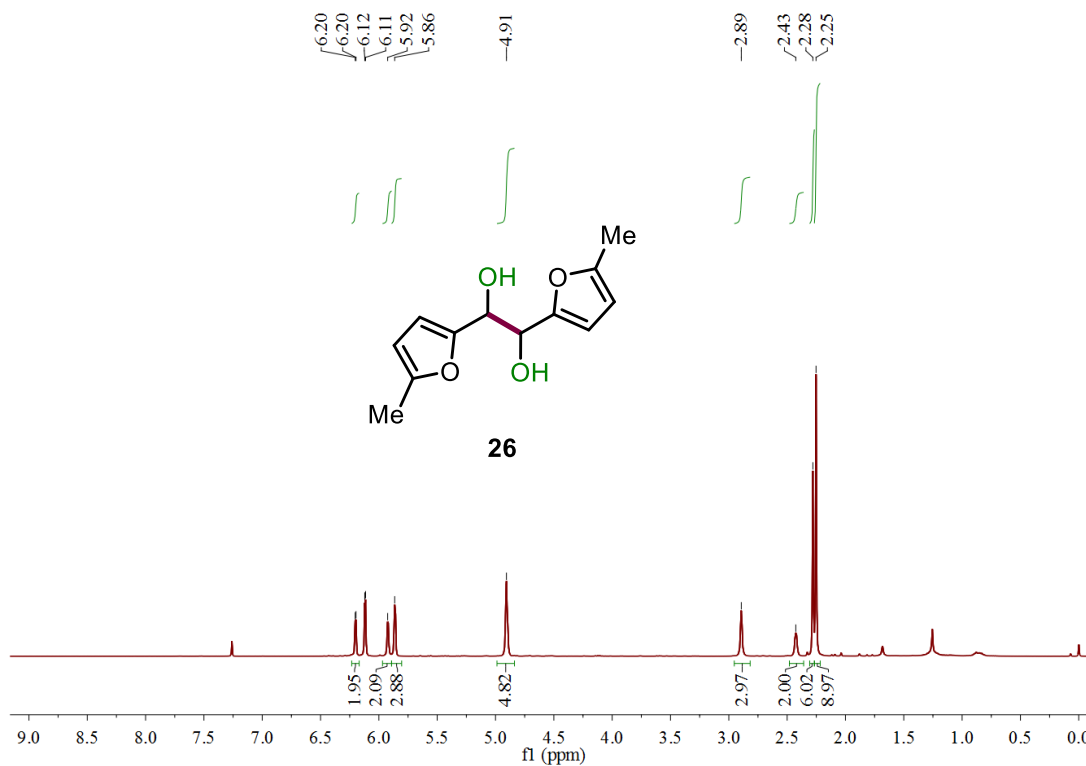

**<sup>13</sup>C NMR (100 MHz, CDCl<sub>3</sub>) spectrum of compound 26**

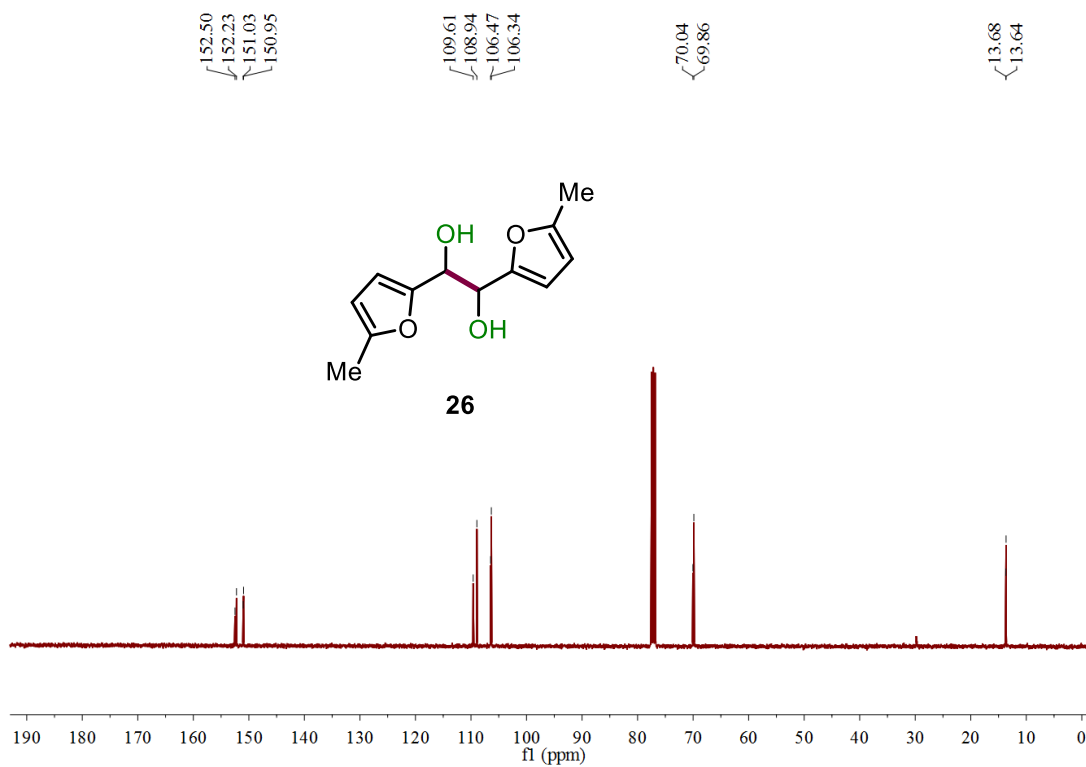

**<sup>1</sup>H NMR (400 MHz, DMSO-*d*<sub>6</sub>) spectrum of compound 27**

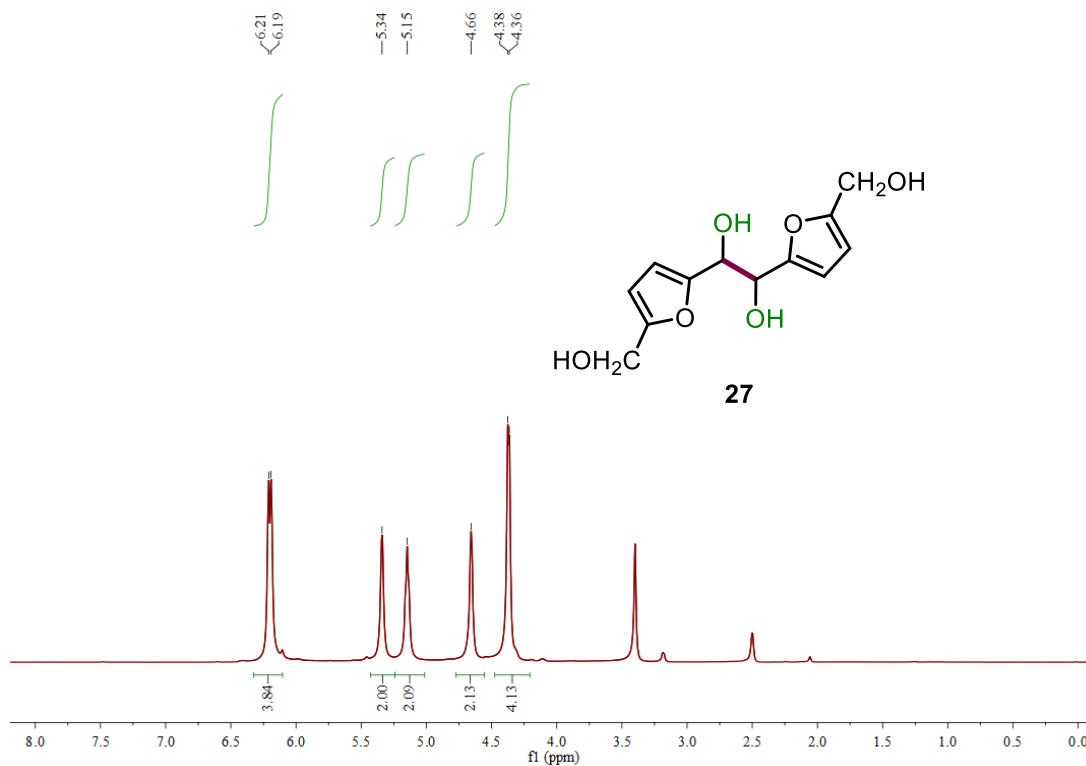

**<sup>13</sup>C NMR (100 MHz, DMSO-*d*<sub>6</sub>) spectrum of compound 27**

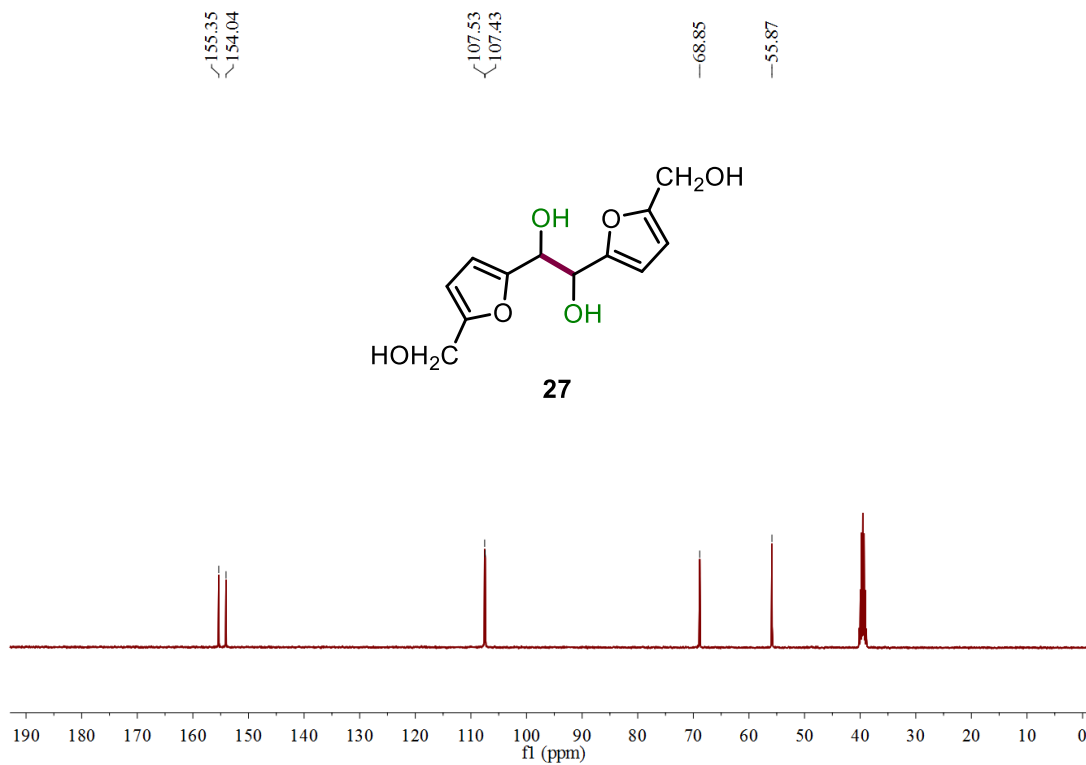

**<sup>1</sup>H NMR (400 MHz, CDCl<sub>3</sub>) spectrum of compound 28**

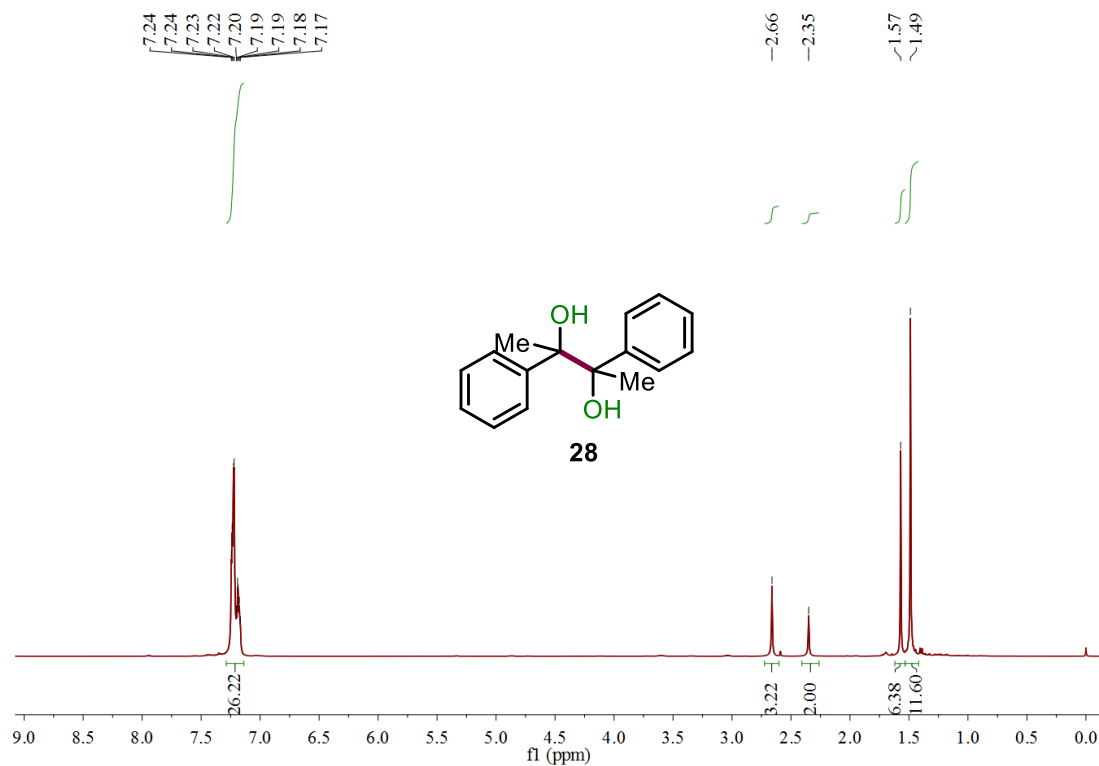

**<sup>13</sup>C NMR (100 MHz, CDCl<sub>3</sub>) spectrum of compound 28**

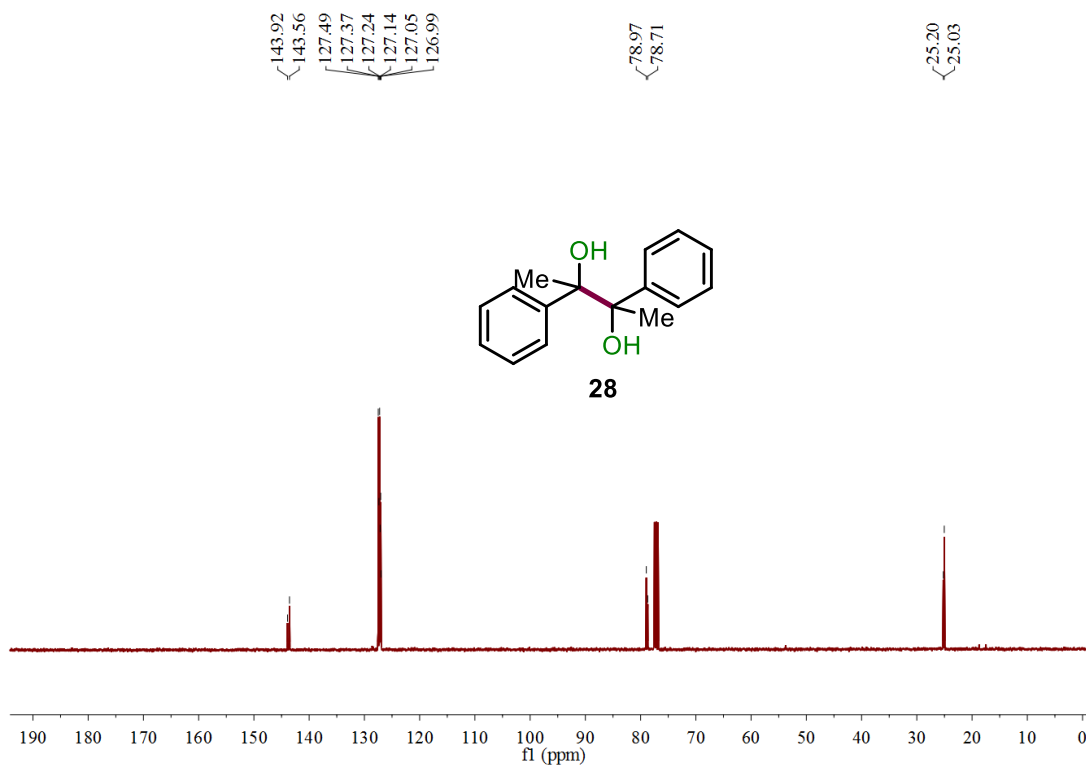

**<sup>1</sup>H NMR (400 MHz, CDCl<sub>3</sub>) spectrum of compound 29**

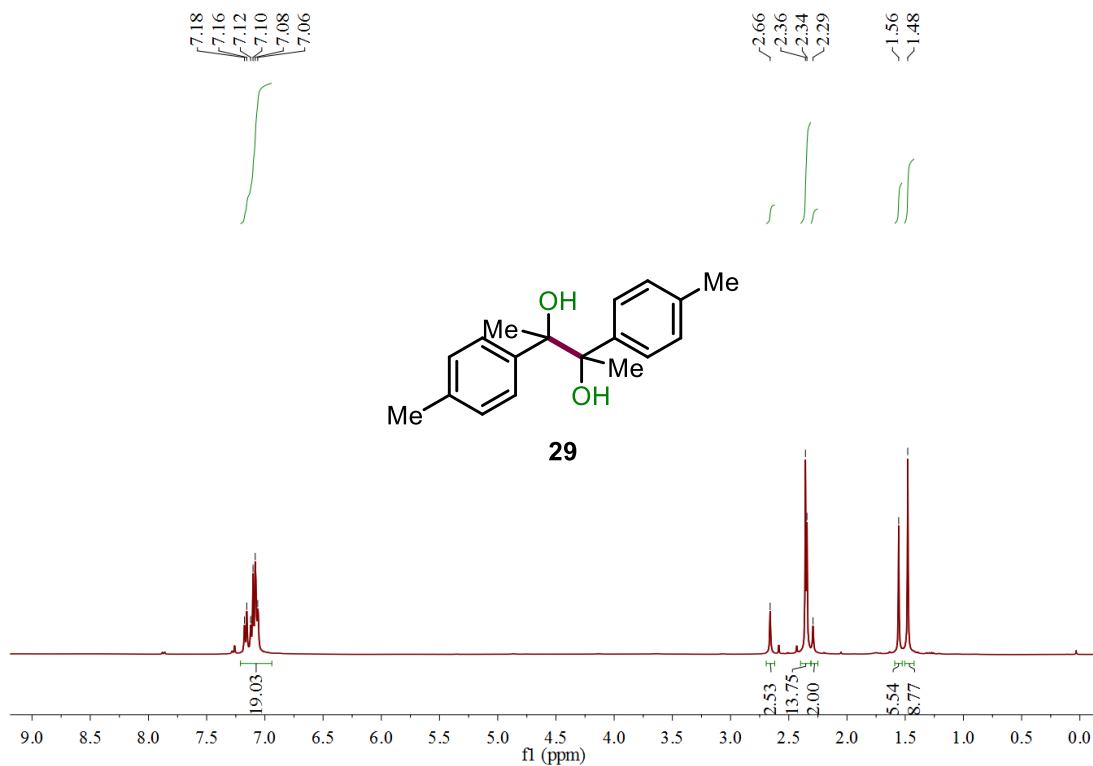

**<sup>13</sup>C NMR (100 MHz, CDCl<sub>3</sub>) spectrum of compound 29**

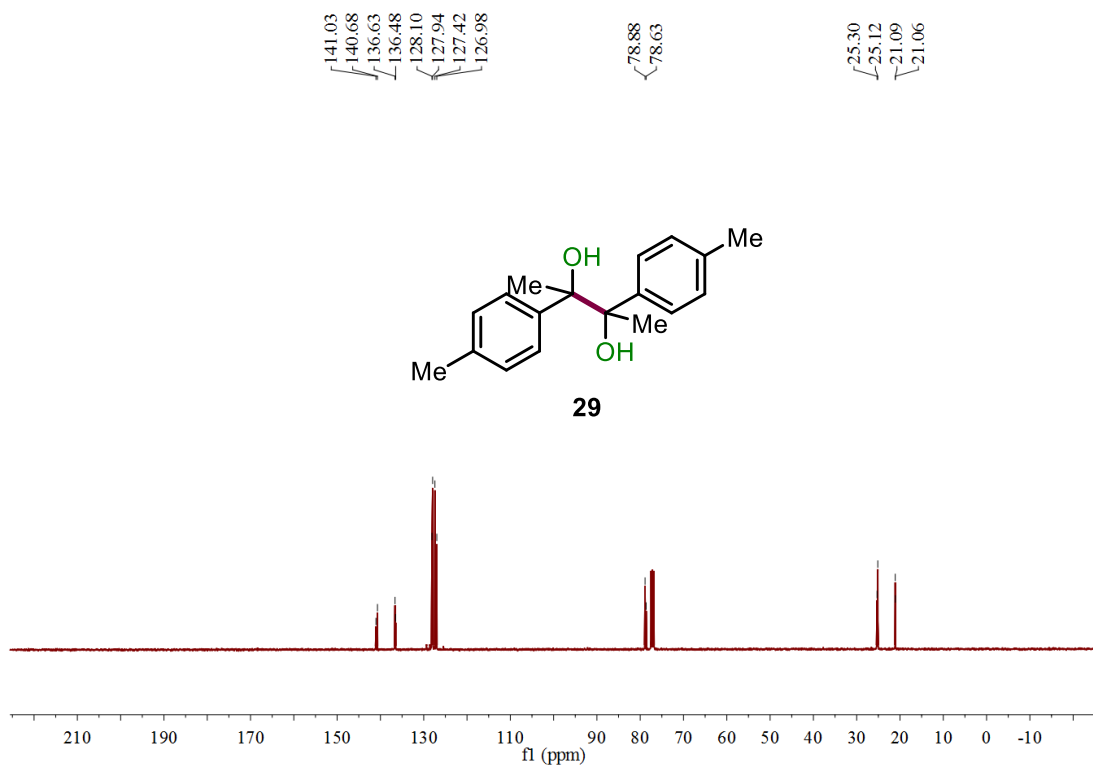

**<sup>1</sup>H NMR (400 MHz, CDCl<sub>3</sub>) spectrum of compound 30**

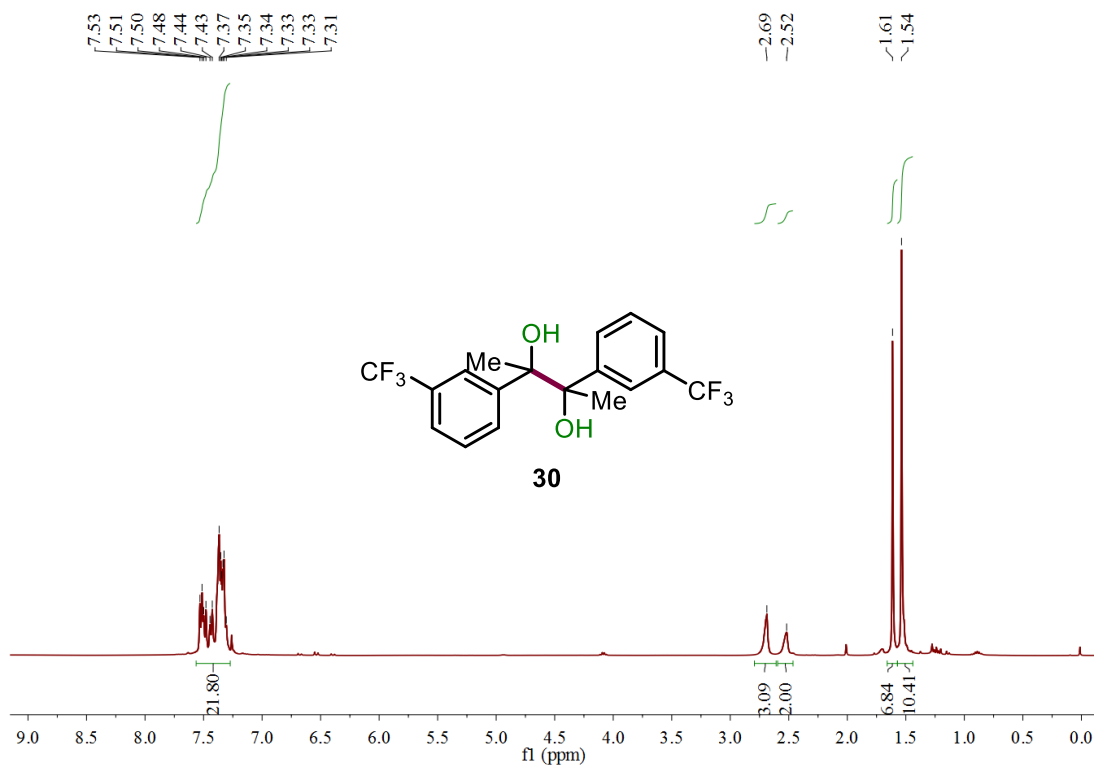

**<sup>13</sup>C NMR (100 MHz, CDCl<sub>3</sub>) spectrum of compound 30**

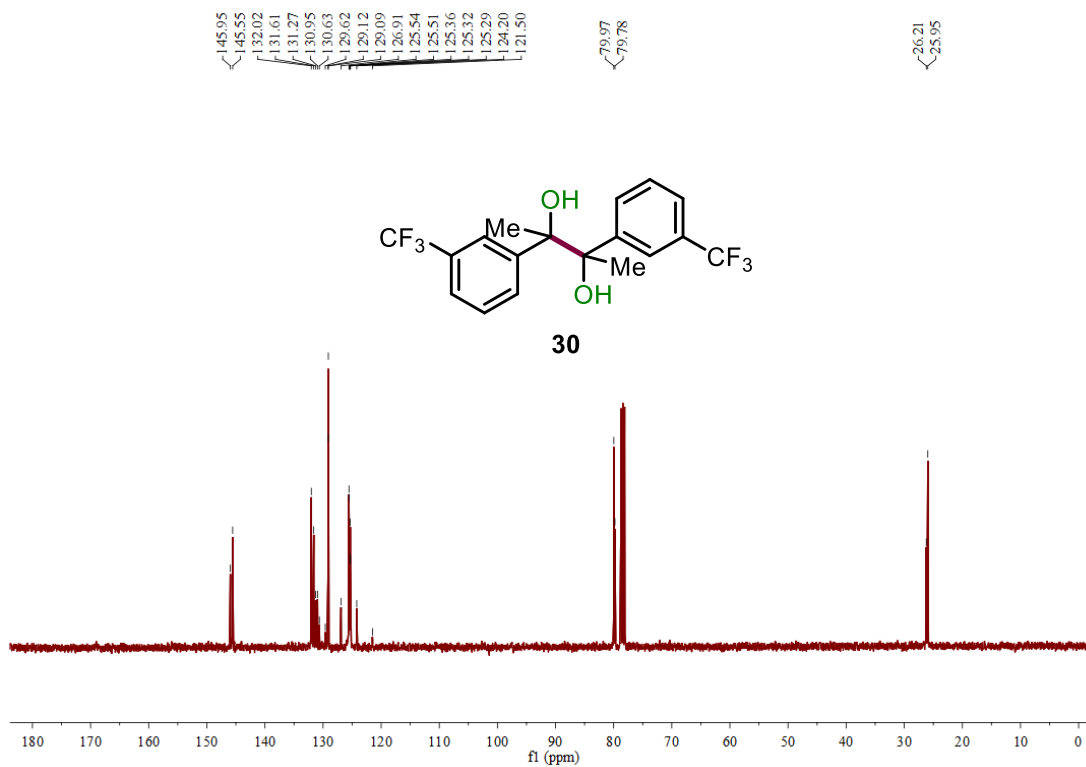

**$^{19}\text{F}$  NMR (376 MHz,  $\text{CDCl}_3$ ) spectrum of compound 30**

-62.63  
-62.70

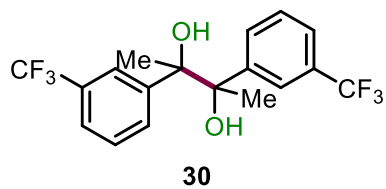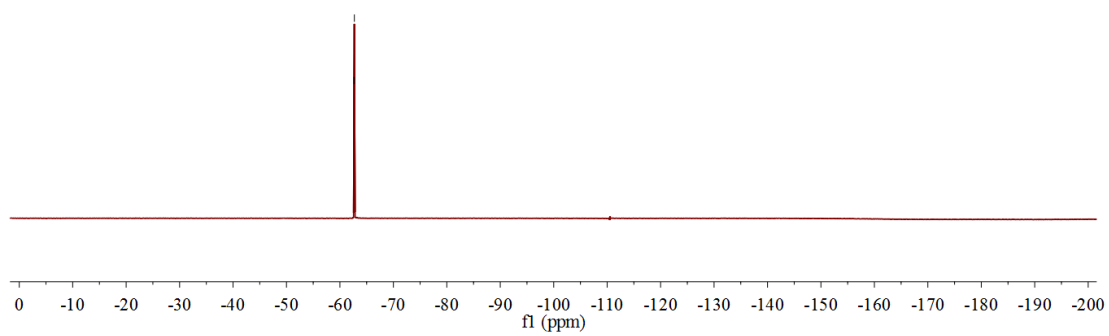

**<sup>1</sup>H NMR (400 MHz, CDCl<sub>3</sub>) spectrum of compound 31**

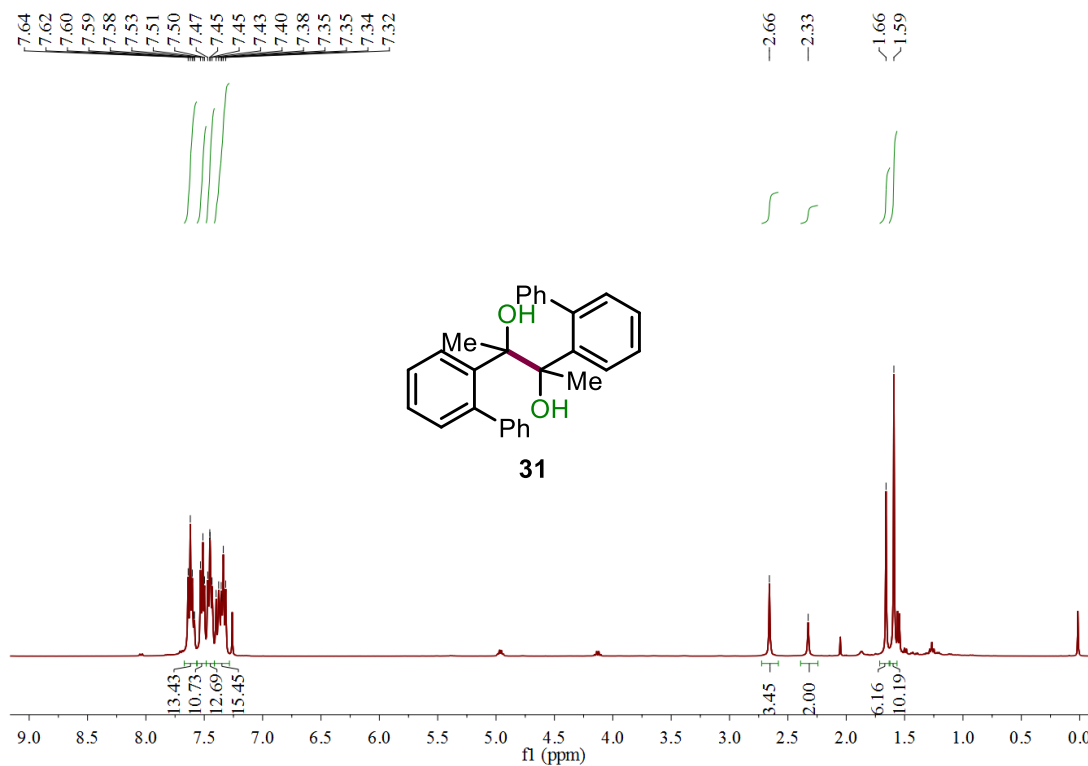

**<sup>13</sup>C NMR (100 MHz, CDCl<sub>3</sub>) spectrum of compound 31**

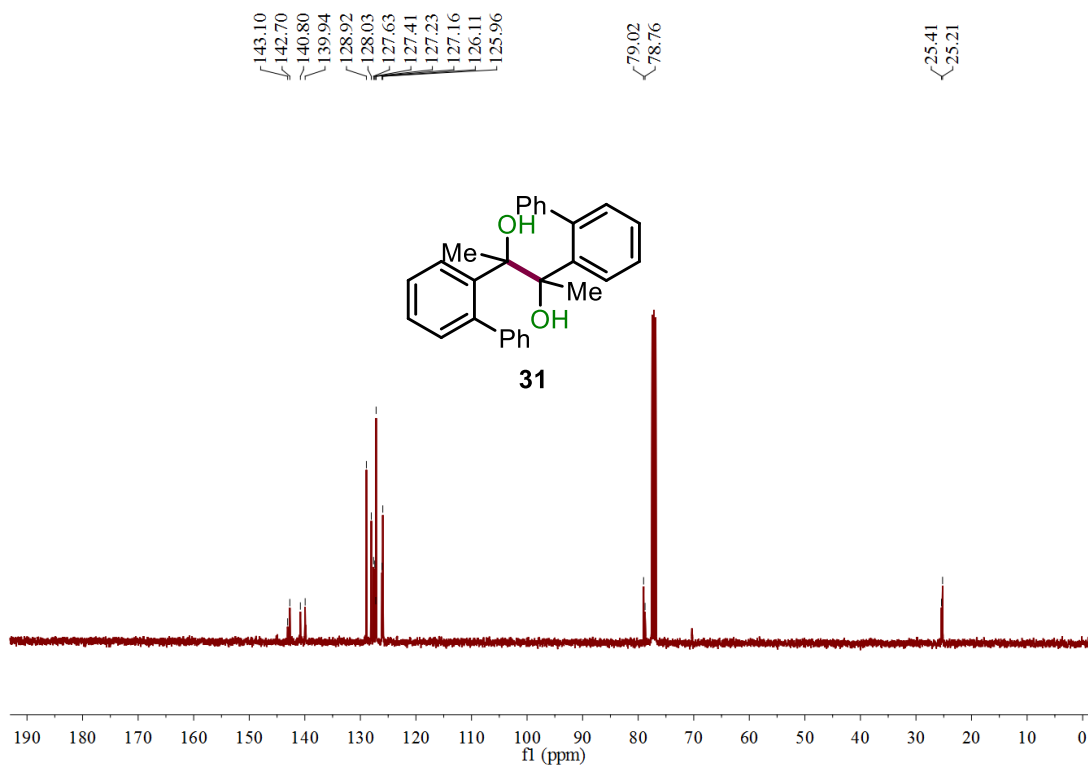

**<sup>1</sup>H NMR (400 MHz, CDCl<sub>3</sub>) spectrum of compound 32**

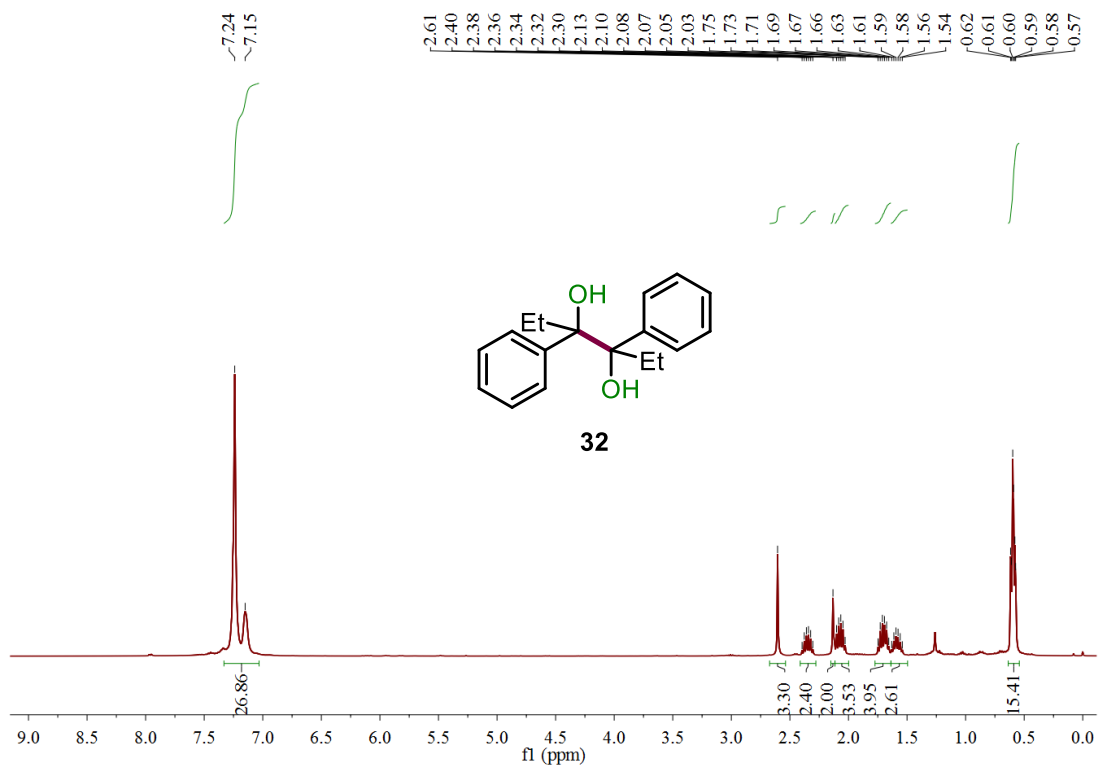

**<sup>13</sup>C NMR (100 MHz, CDCl<sub>3</sub>) spectrum of compound 32**

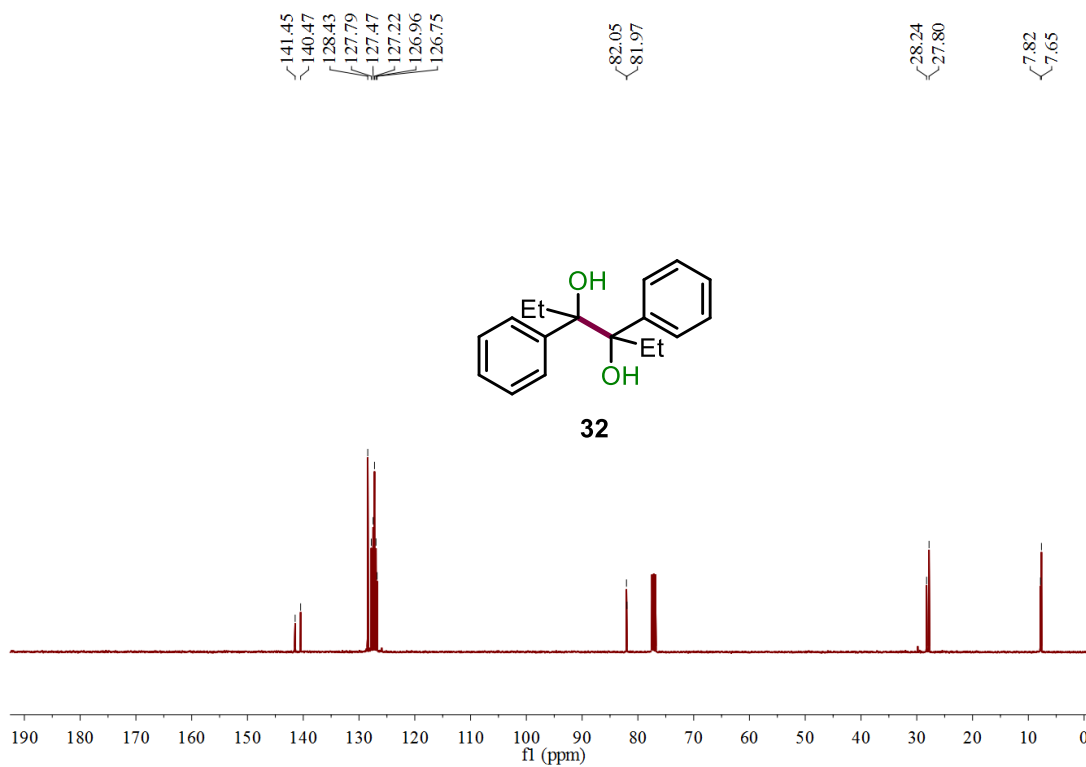



**<sup>1</sup>H NMR (400 MHz, CDCl<sub>3</sub>) spectrum of compound 33**

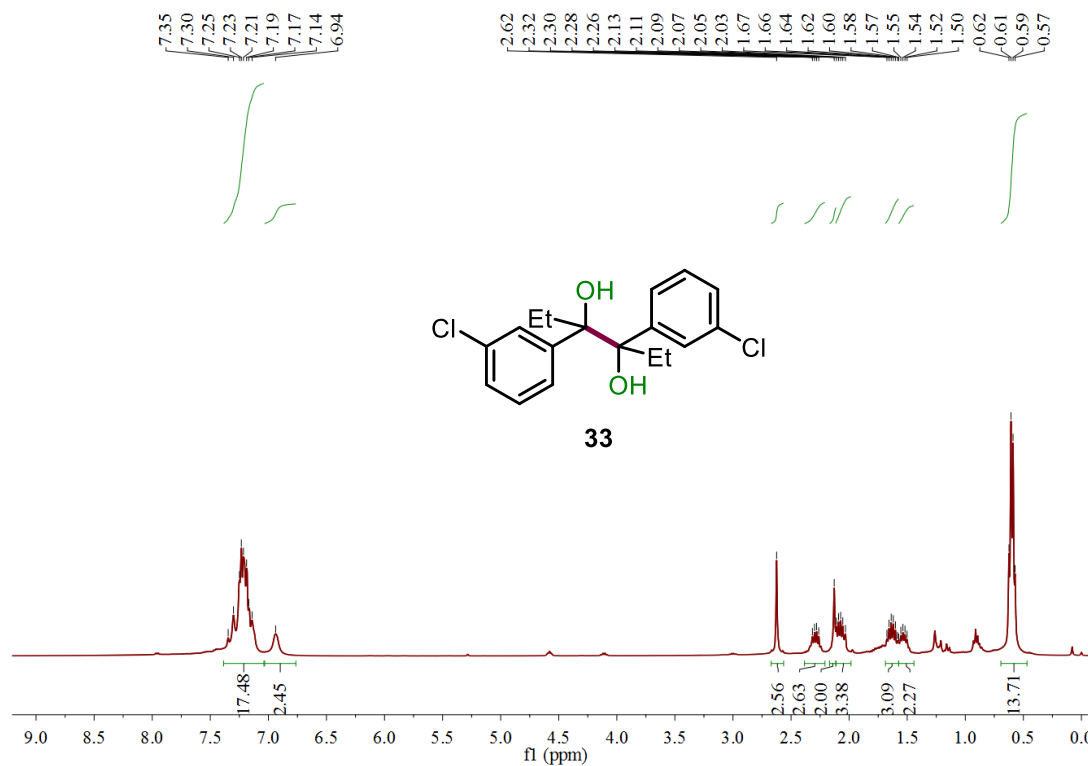

**<sup>13</sup>C NMR (100 MHz, CDCl<sub>3</sub>) spectrum of compound 33**

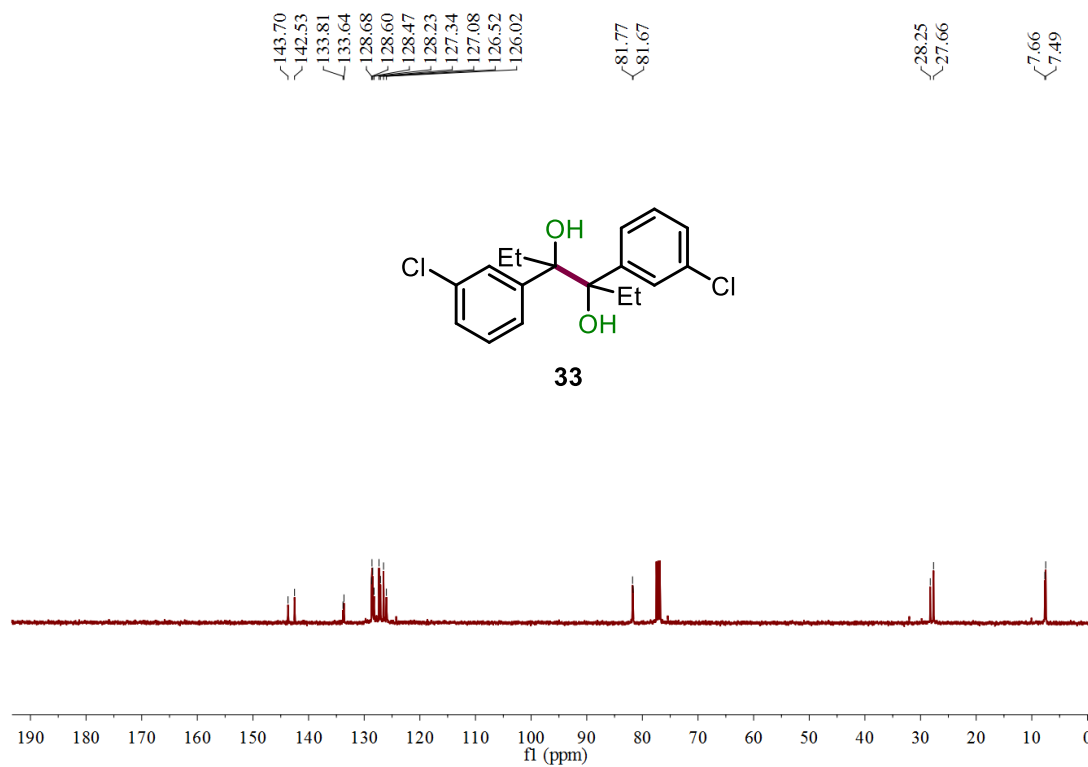

**<sup>1</sup>H NMR (400 MHz, CDCl<sub>3</sub>) spectrum of compound 34**

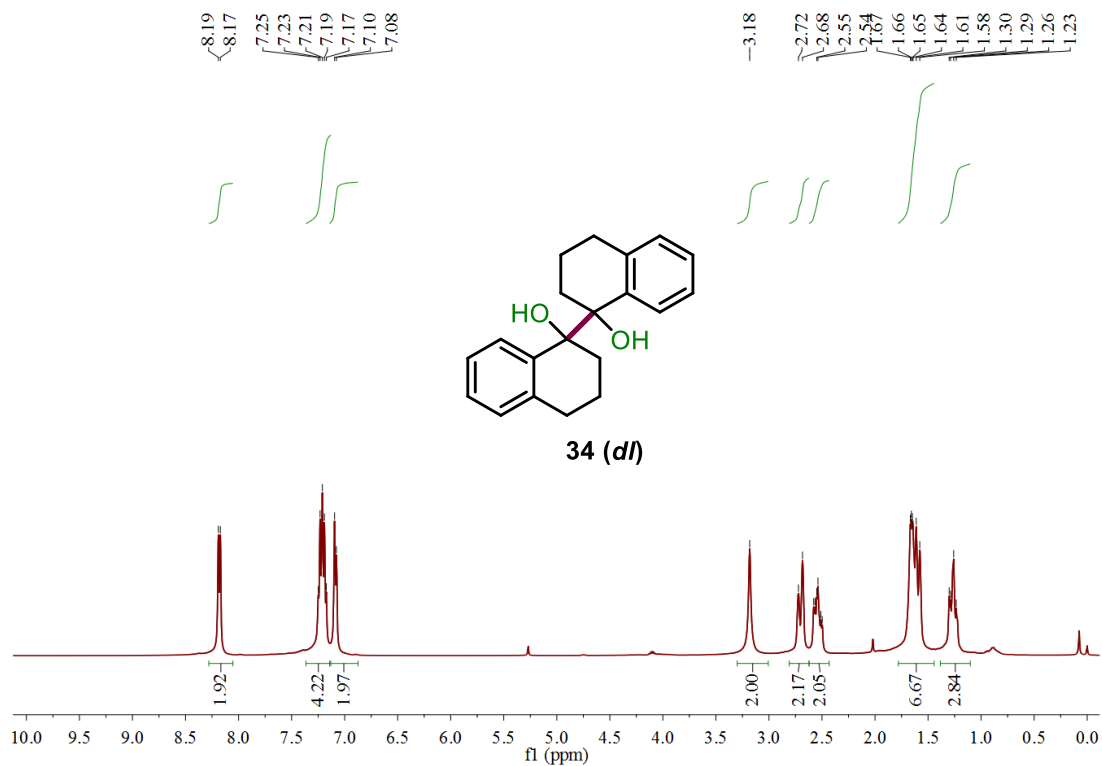

**<sup>13</sup>C NMR (100 MHz, CDCl<sub>3</sub>) spectrum of compound 34**

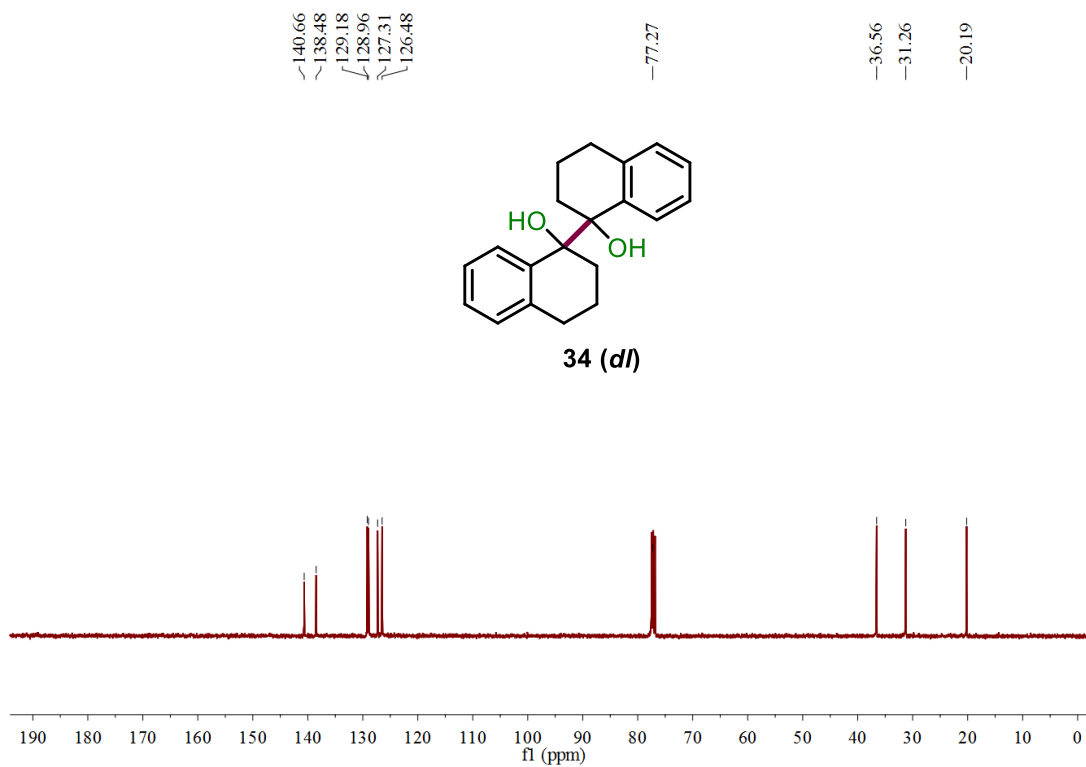

**<sup>1</sup>H NMR (400 MHz, CDCl<sub>3</sub>) spectrum of compound 34**

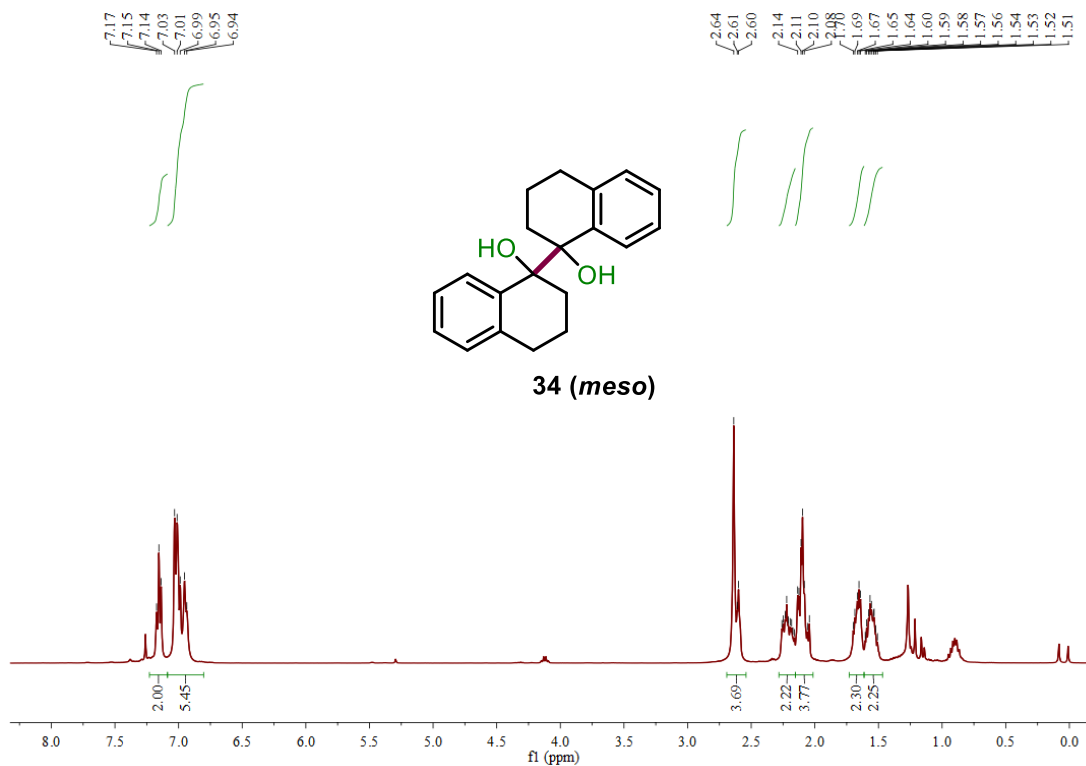

**<sup>13</sup>C NMR (100 MHz, CDCl<sub>3</sub>) spectrum of compound 34**

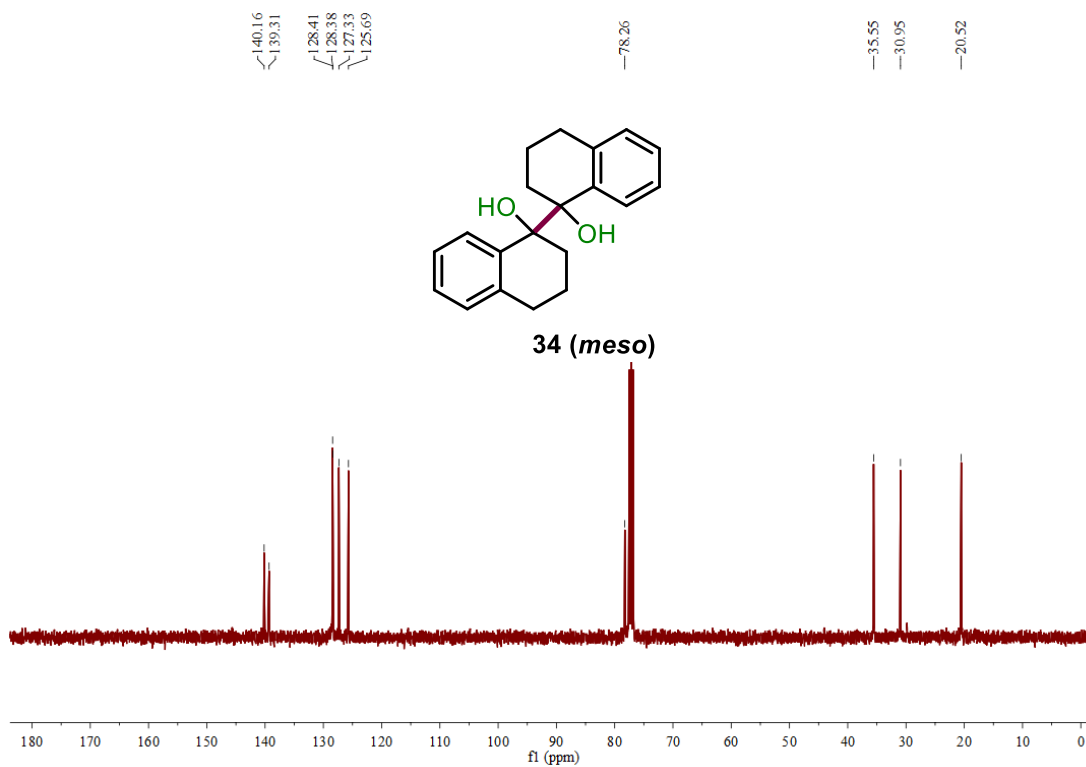

**<sup>1</sup>H NMR (400 MHz, CDCl<sub>3</sub>) spectrum of compound 35**

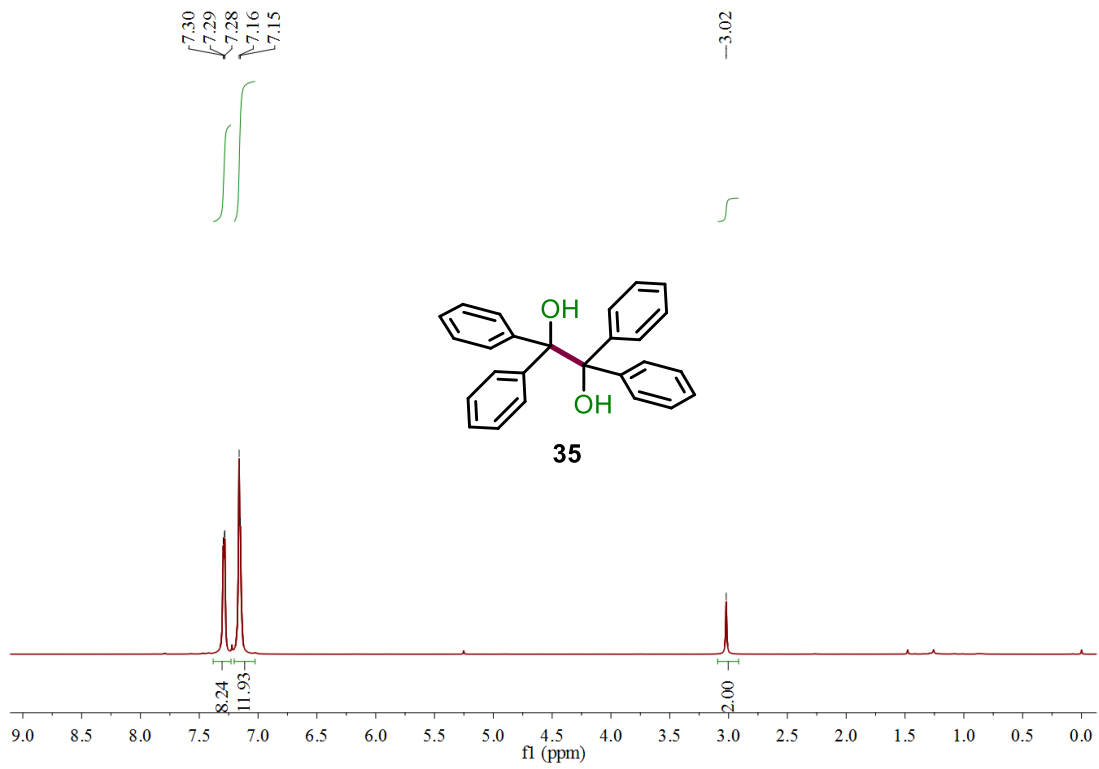

**<sup>13</sup>C NMR (100 MHz, CDCl<sub>3</sub>) spectrum of compound 35**

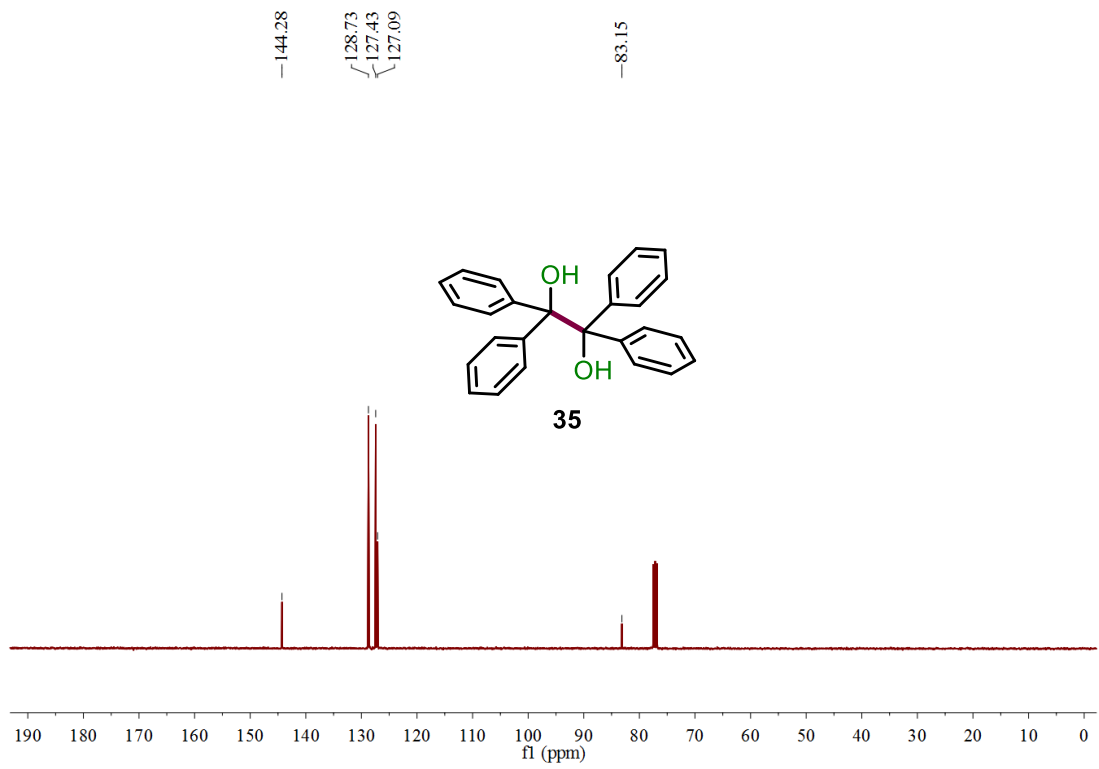

**<sup>1</sup>H NMR (400 MHz, CDCl<sub>3</sub>) spectrum of compound 36**

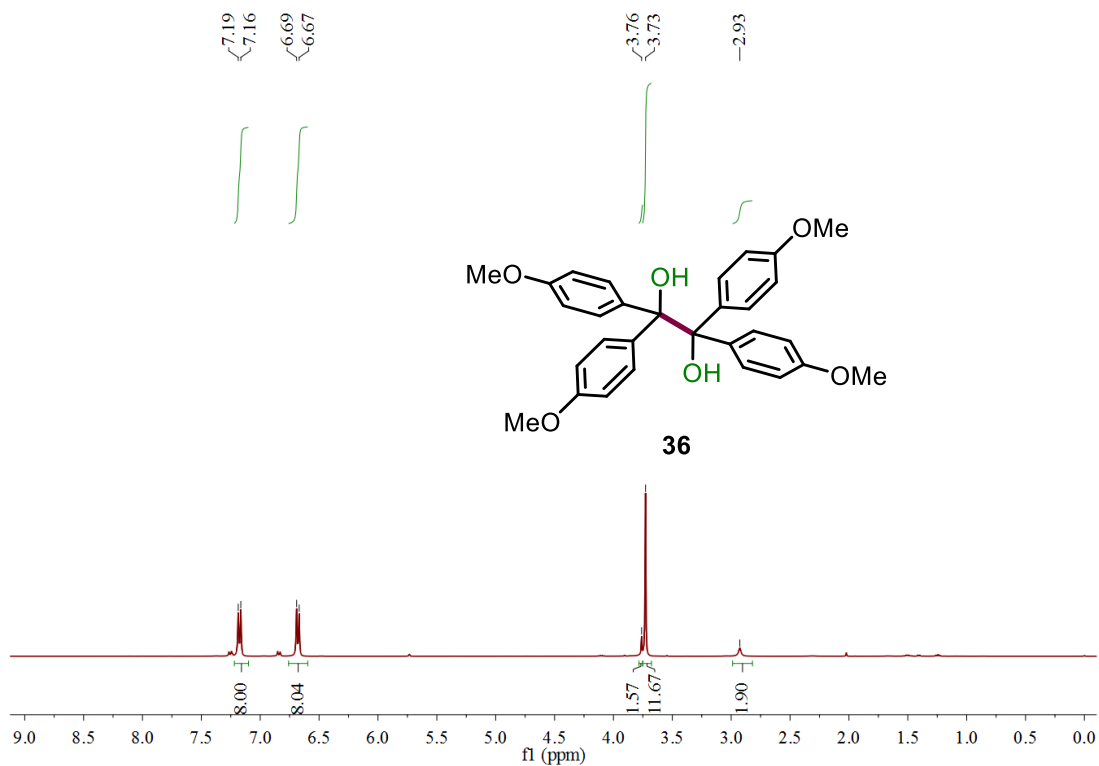

**<sup>13</sup>C NMR (100 MHz, CDCl<sub>3</sub>) spectrum of compound 36**

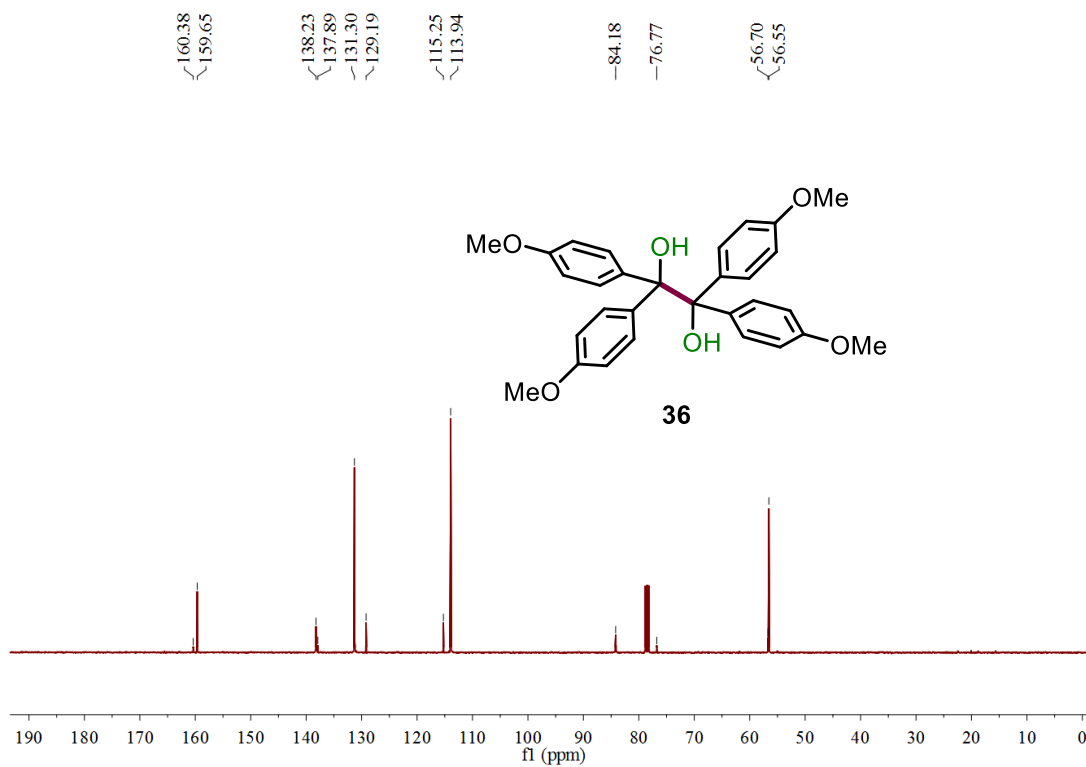

**<sup>1</sup>H NMR (400 MHz, CDCl<sub>3</sub>) spectrum of compound 37**

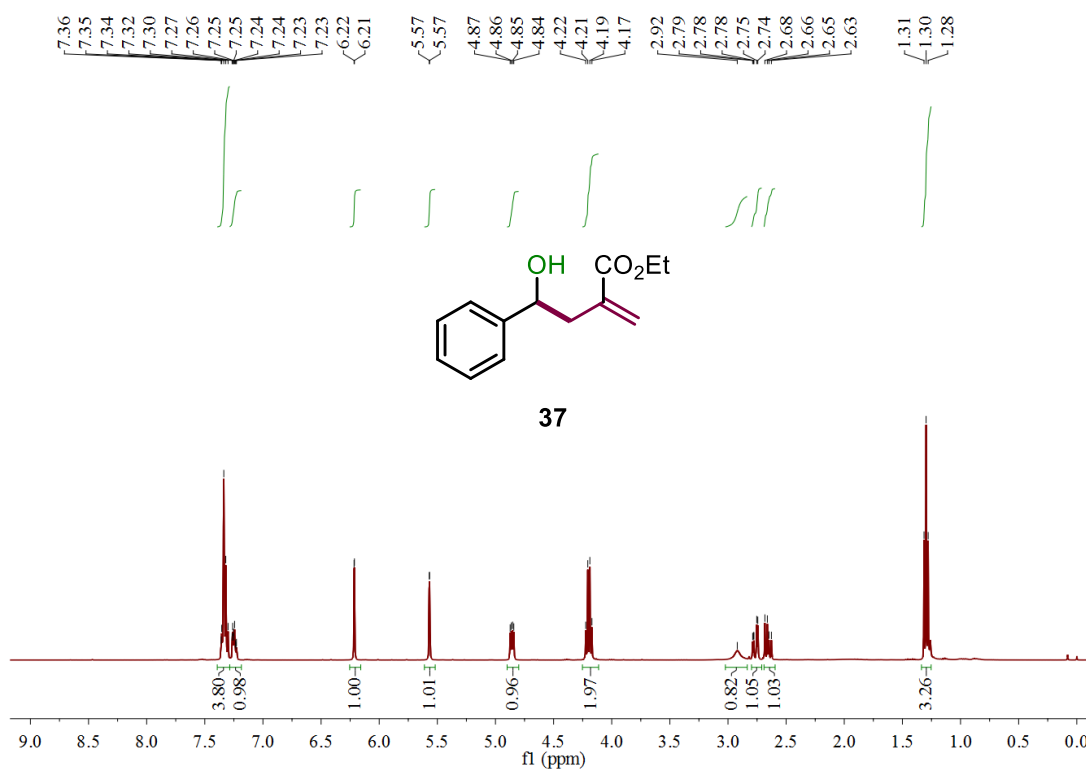

**<sup>13</sup>C NMR (100 MHz, CDCl<sub>3</sub>) spectrum of compound 37**

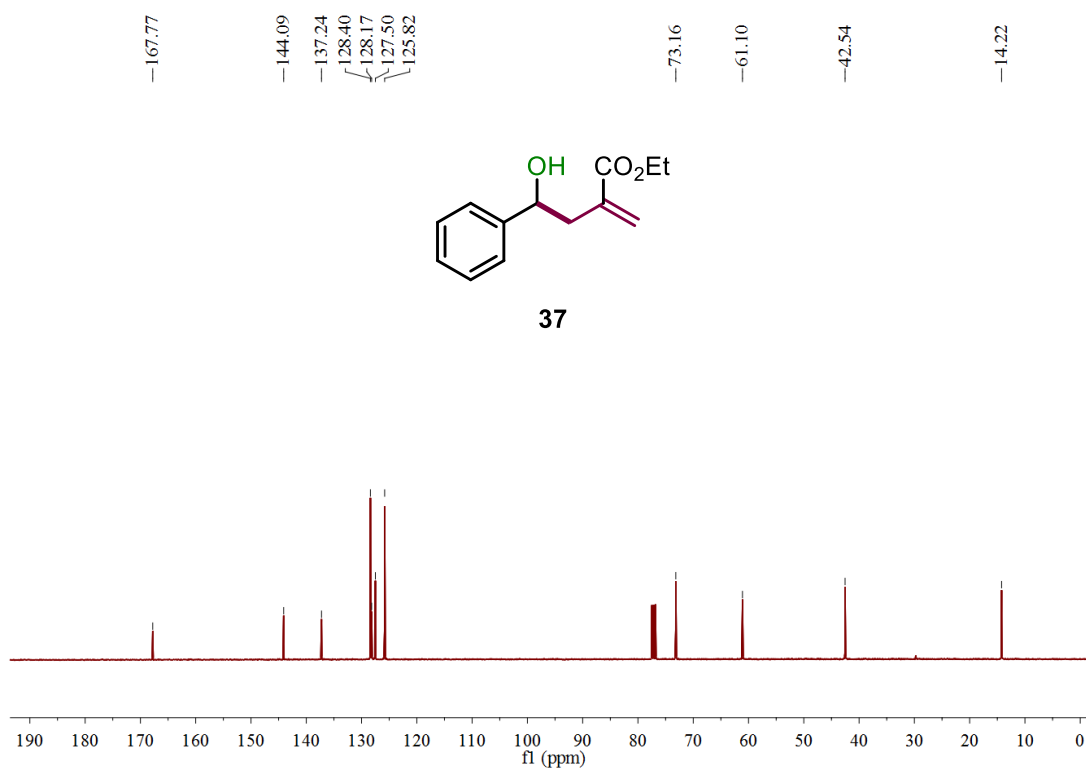

**<sup>1</sup>H NMR (400 MHz, CDCl<sub>3</sub>) spectrum of compound 38**

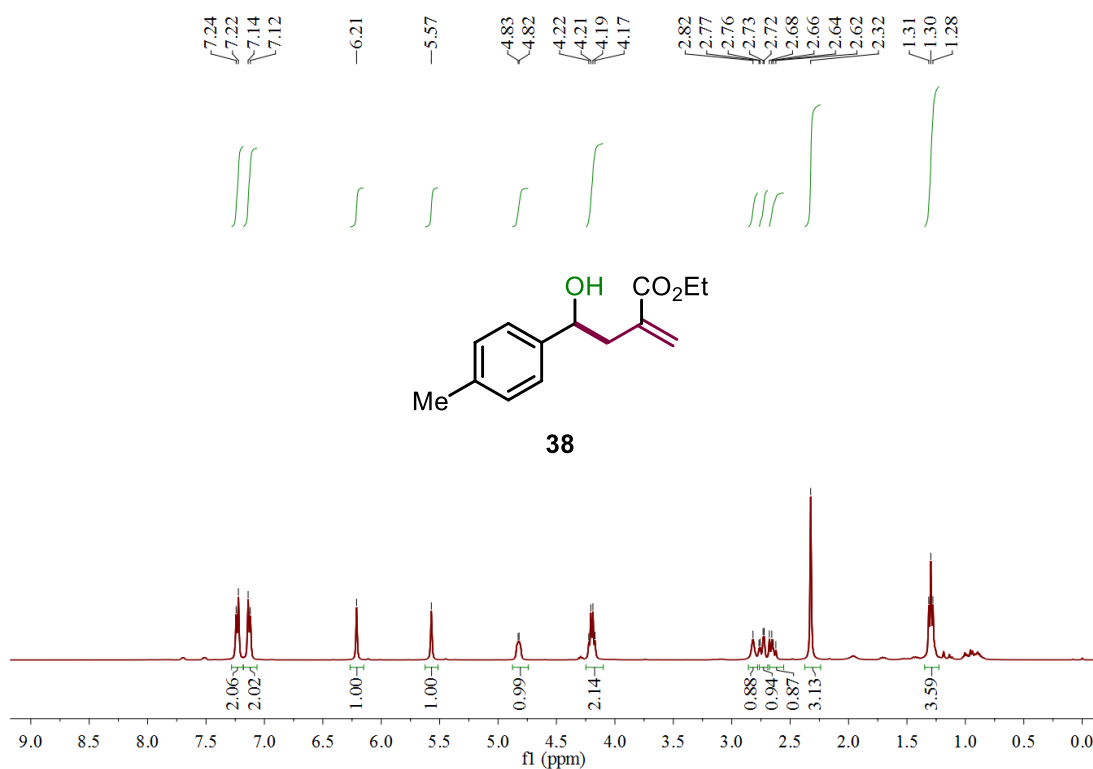

**<sup>13</sup>C NMR (100 MHz, CDCl<sub>3</sub>) spectrum of compound 38**

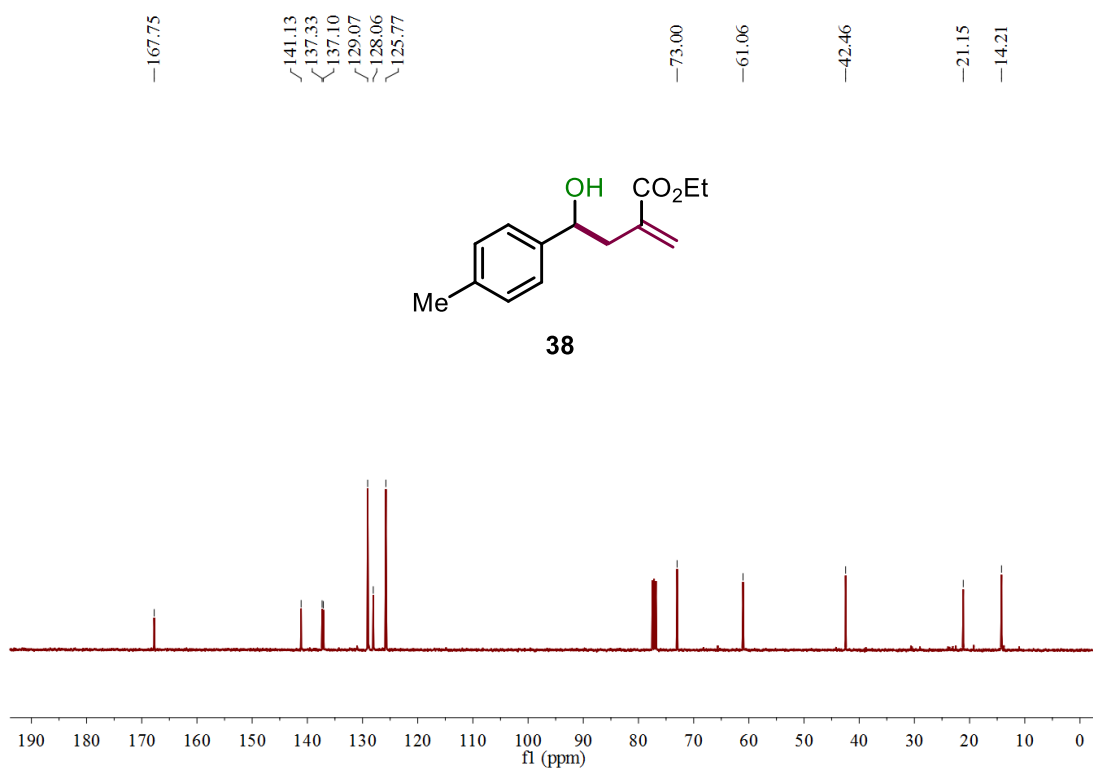

**<sup>1</sup>H NMR (400 MHz, CDCl<sub>3</sub>) spectrum of compound 39**

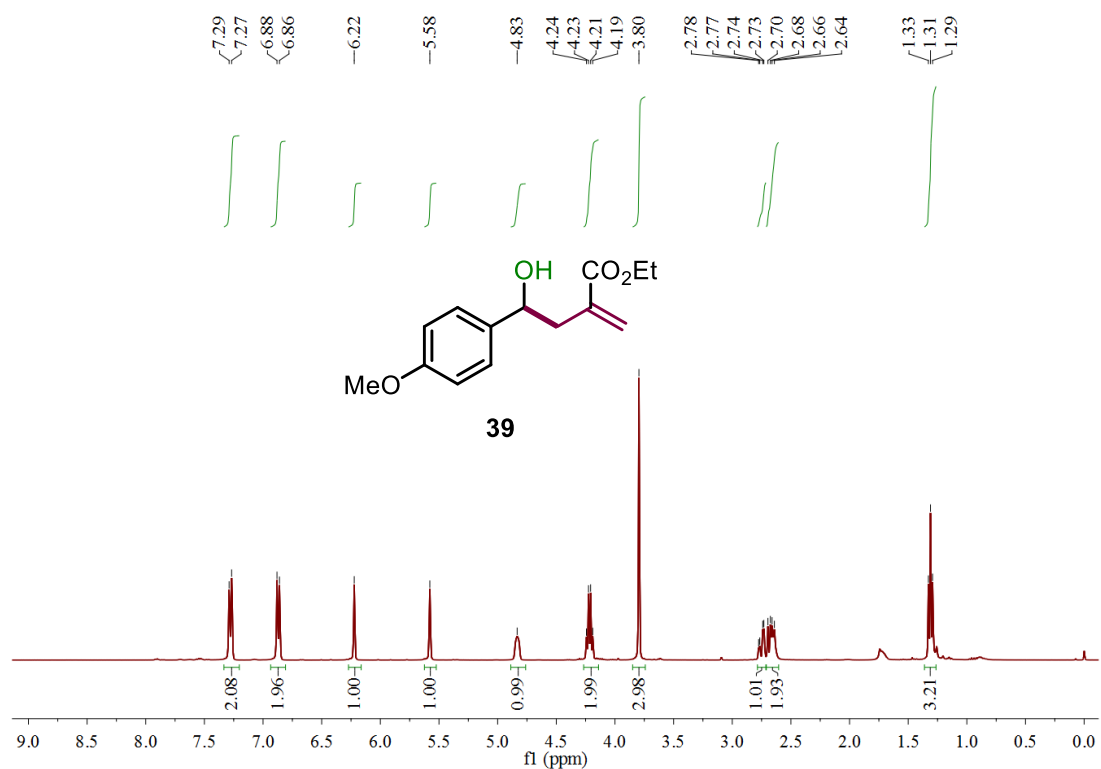

**<sup>13</sup>C NMR (100 MHz, CDCl<sub>3</sub>) spectrum of compound 39**

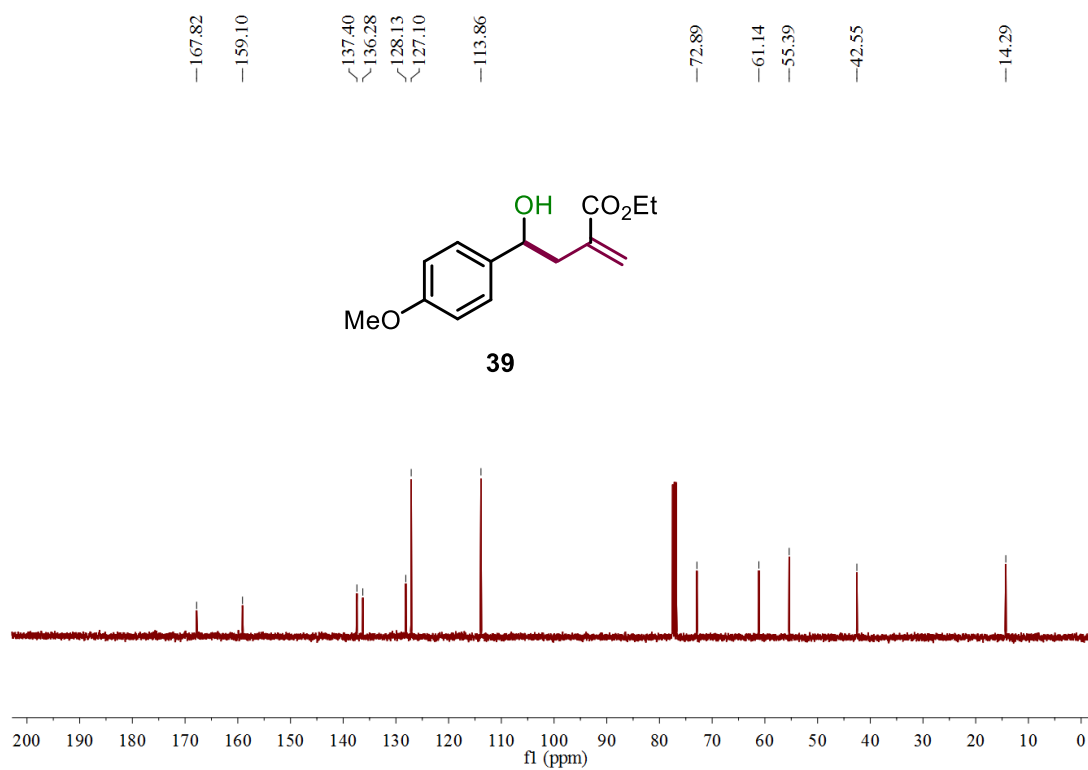



**<sup>1</sup>H NMR (400 MHz, CDCl<sub>3</sub>) spectrum of compound 40**

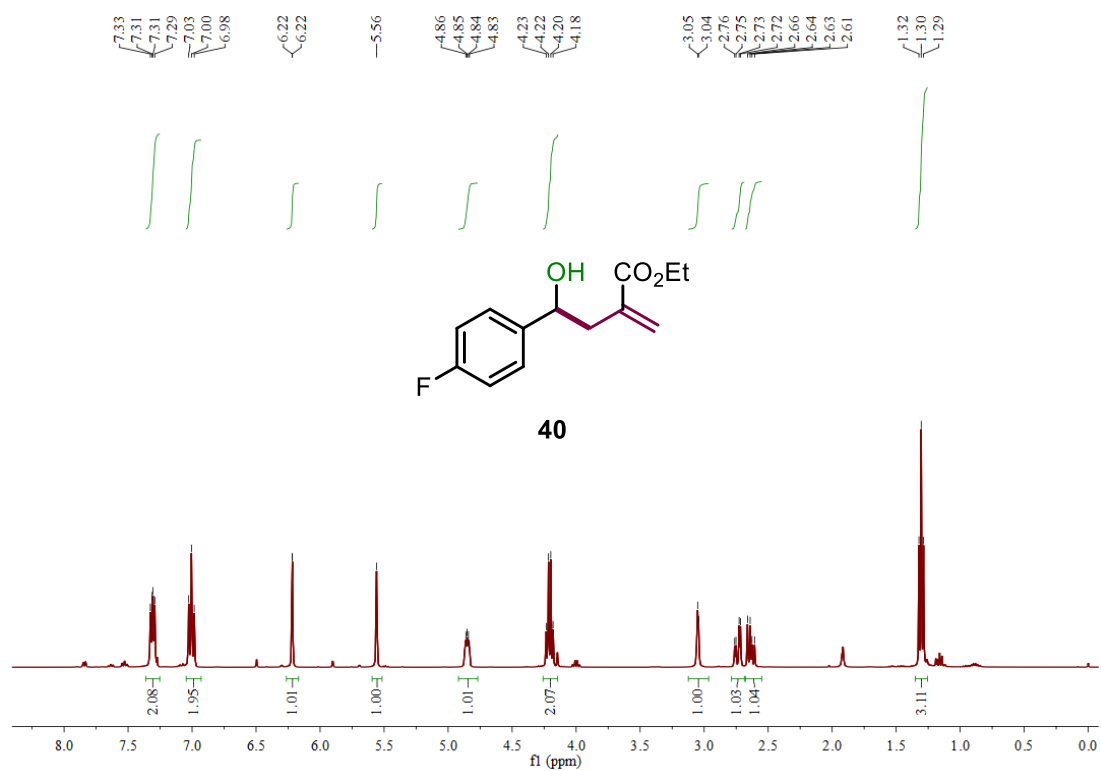

**<sup>13</sup>C NMR (100 MHz, CDCl<sub>3</sub>) spectrum of compound 40**

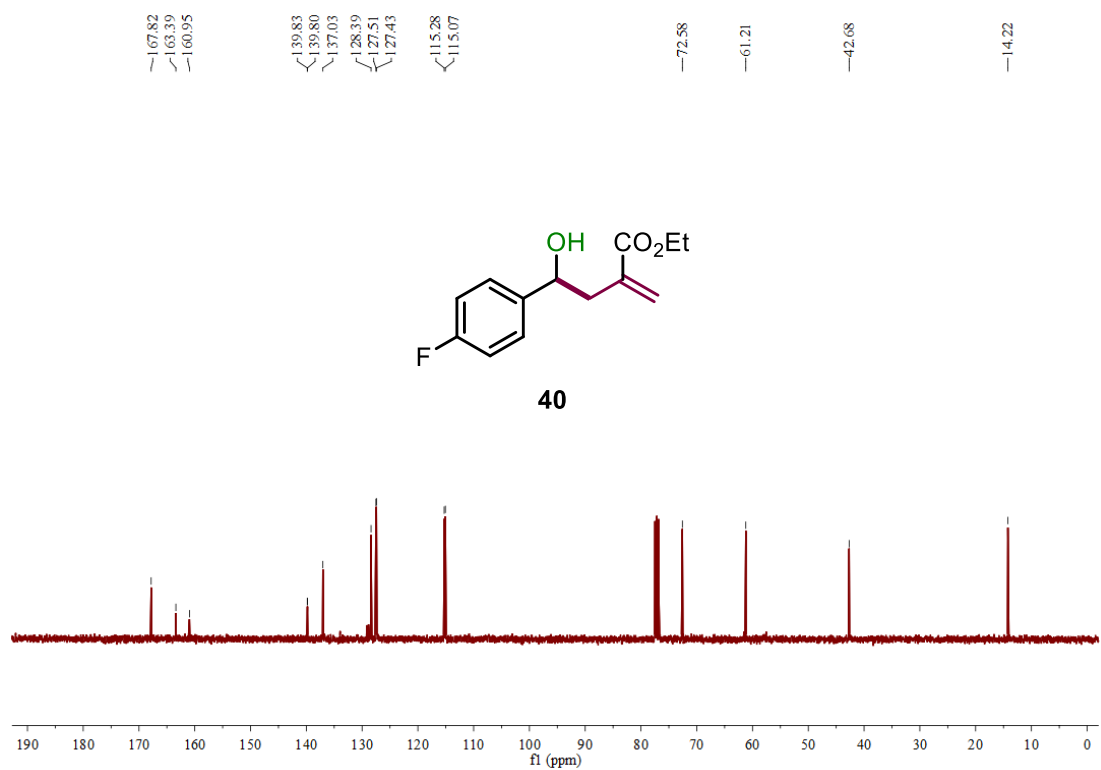

**$^{19}\text{F}$  NMR (376 MHz,  $\text{CDCl}_3$ ) spectrum of compound 40**

-115.36

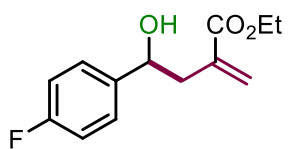

**40**

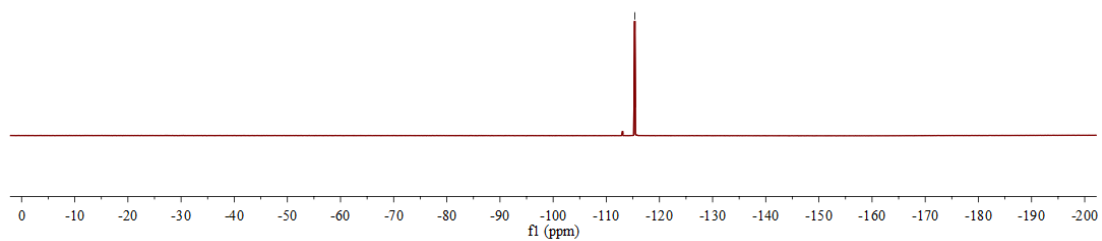

**<sup>1</sup>H NMR (400 MHz, CDCl<sub>3</sub>) spectrum of compound 41**

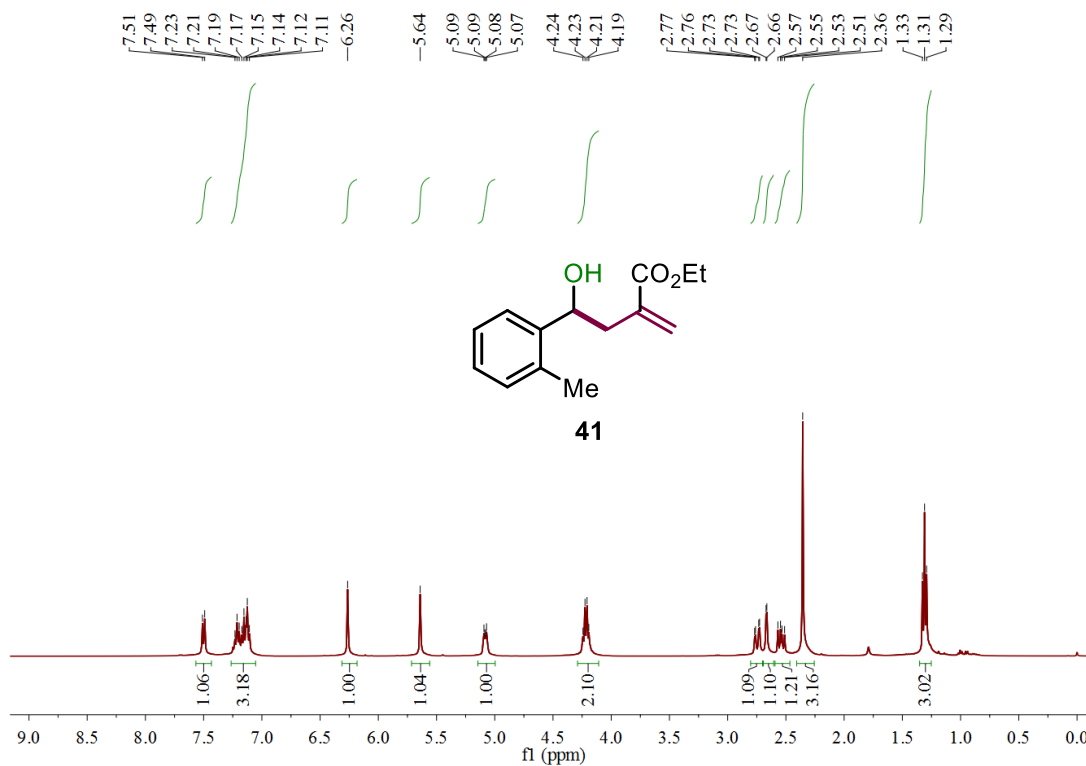

**<sup>13</sup>C NMR (100 MHz, CDCl<sub>3</sub>) spectrum of compound 41**

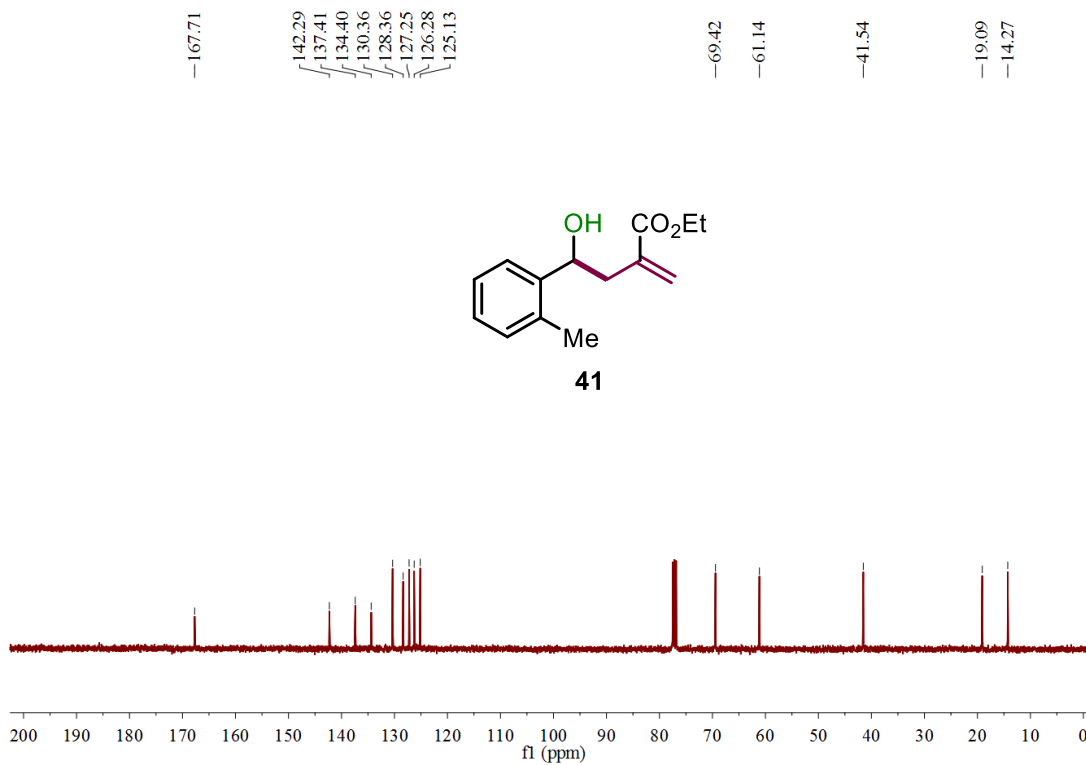

**<sup>1</sup>H NMR (400 MHz, CDCl<sub>3</sub>) spectrum of compound 42**

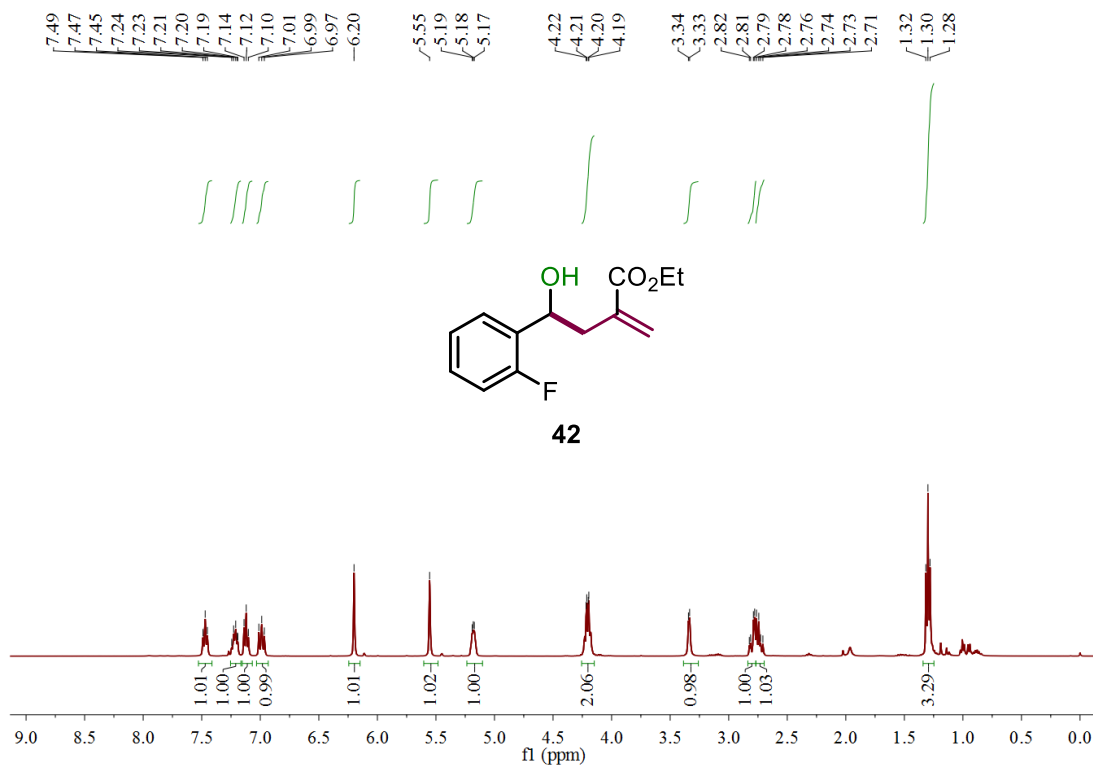

**<sup>13</sup>C NMR (100 MHz, CDCl<sub>3</sub>) spectrum of compound 42**

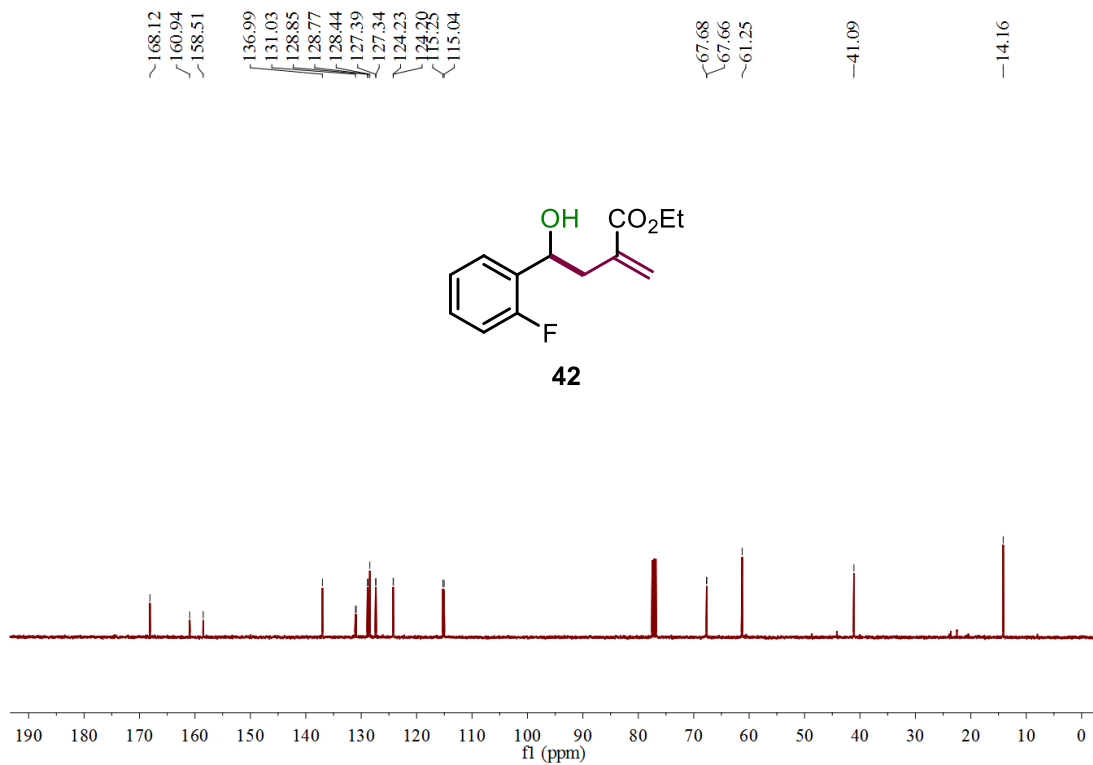

**<sup>19</sup>F NMR (376 MHz, CDCl<sub>3</sub>) spectrum of compound 42**

-119.21

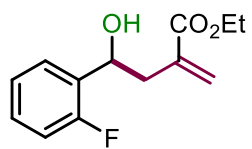

**42**

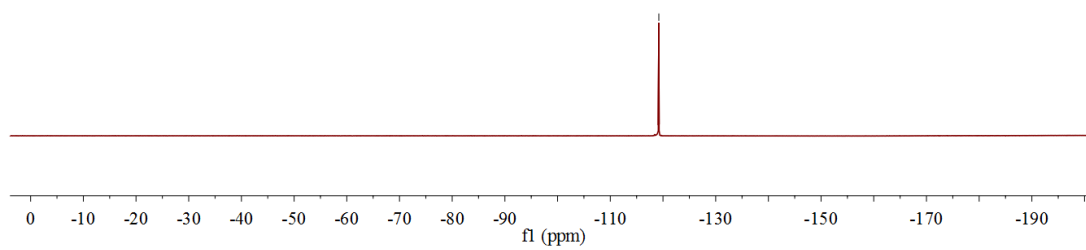

**<sup>1</sup>H NMR (400 MHz, CDCl<sub>3</sub>) spectrum of compound 43**

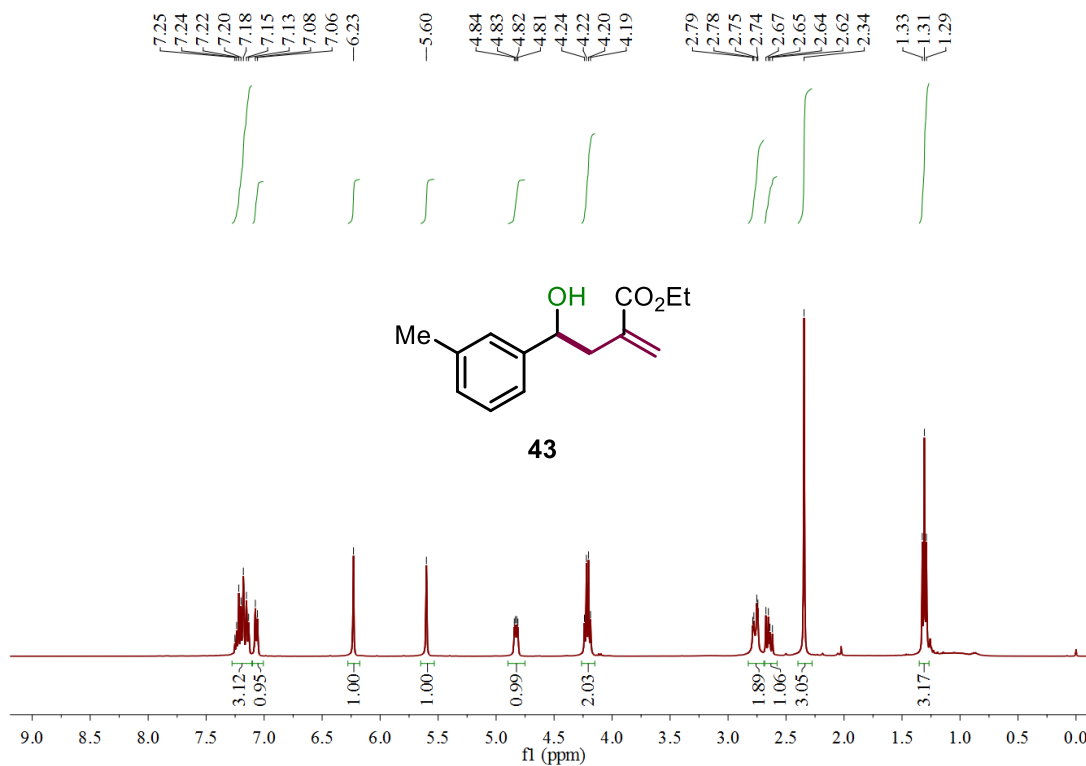

**<sup>13</sup>C NMR (100 MHz, CDCl<sub>3</sub>) spectrum of compound 43**

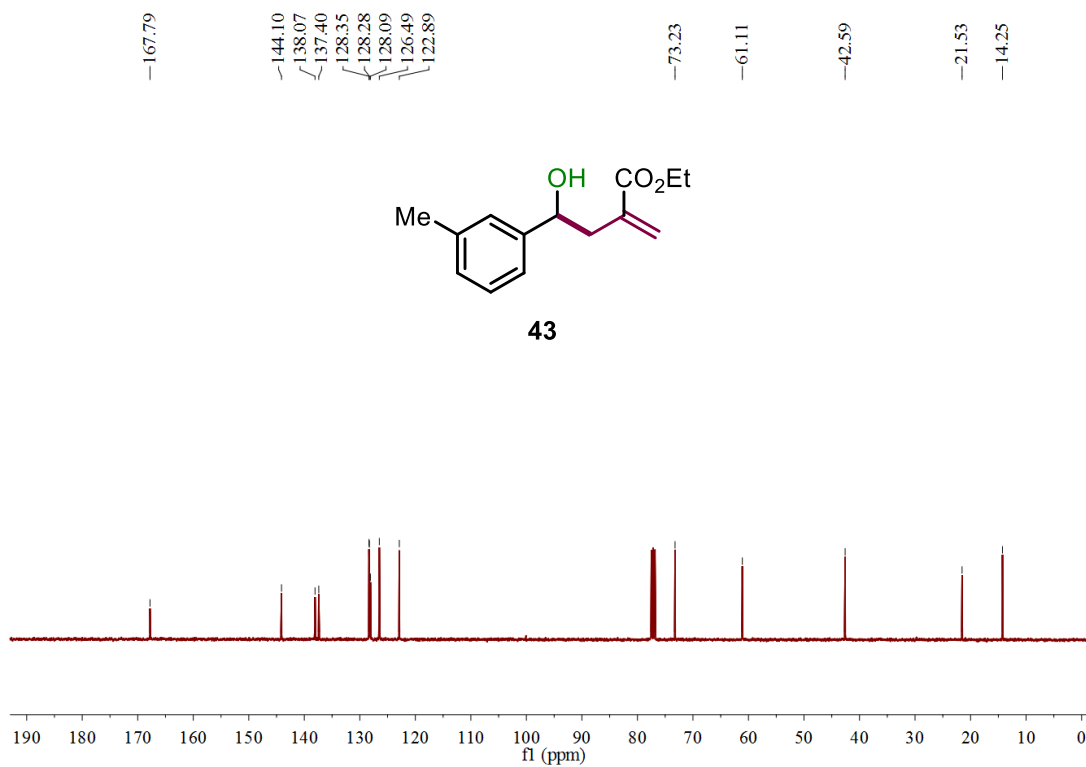

**<sup>1</sup>H NMR (400 MHz, CDCl<sub>3</sub>) spectrum of compound 44**

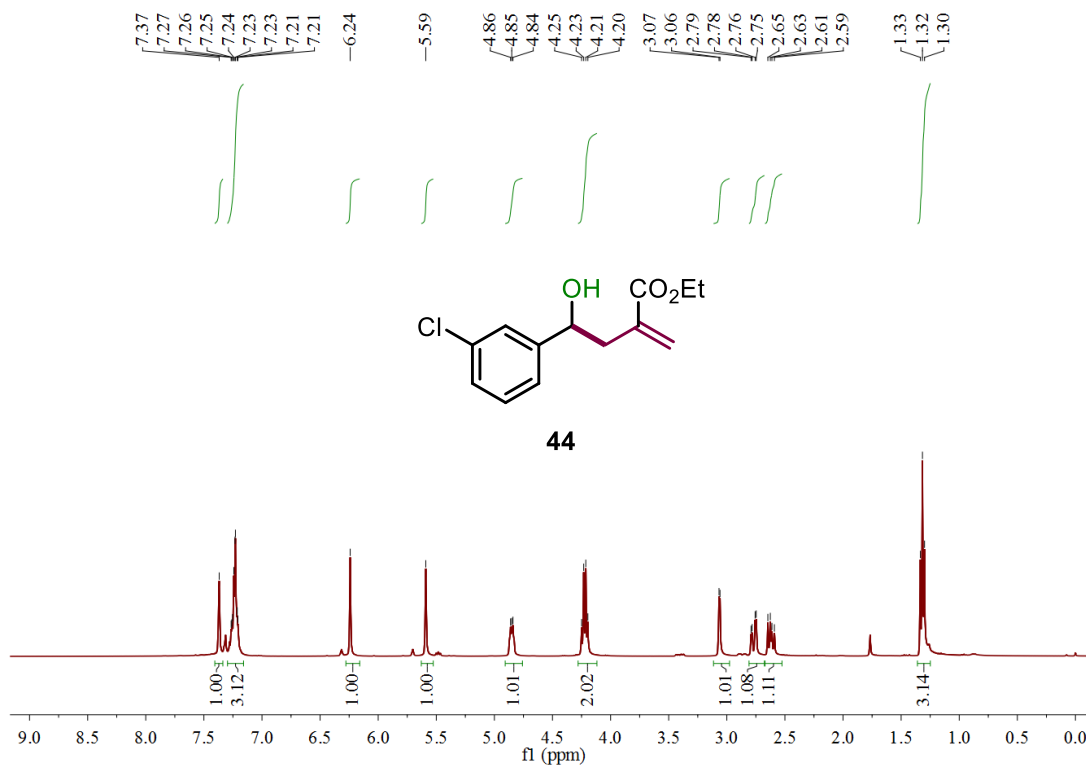

**<sup>13</sup>C NMR (100 MHz, CDCl<sub>3</sub>) spectrum of compound 44**

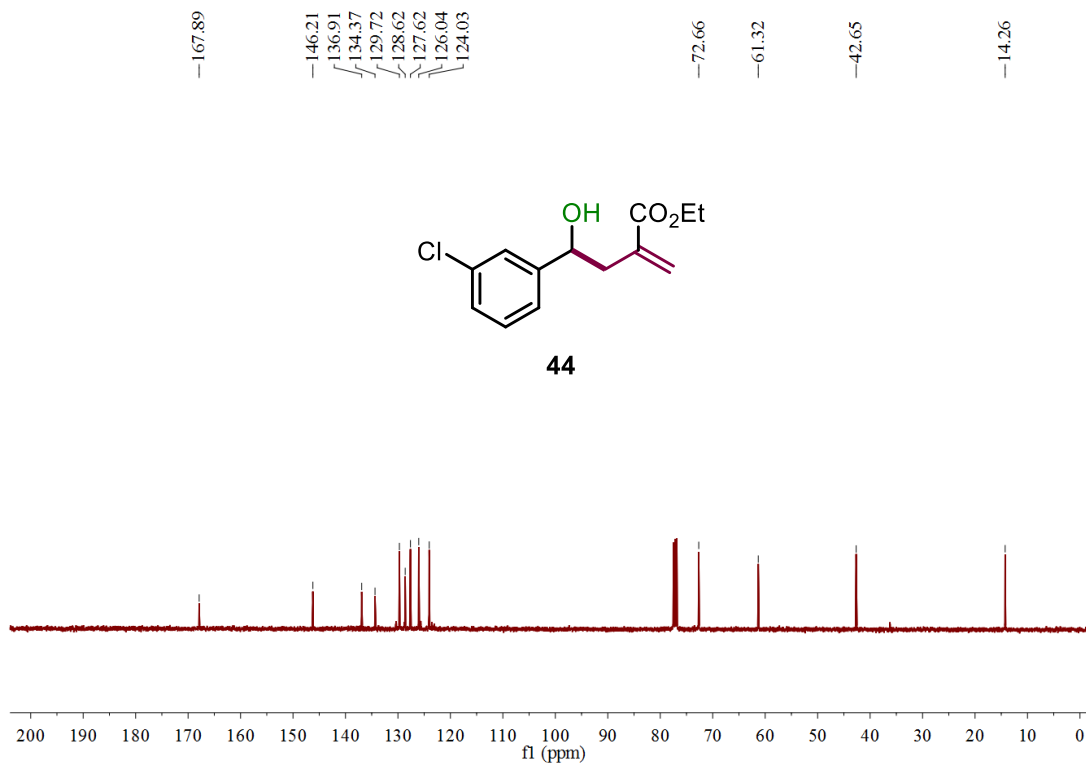

**<sup>1</sup>H NMR (400 MHz, CDCl<sub>3</sub>) spectrum of compound 45**

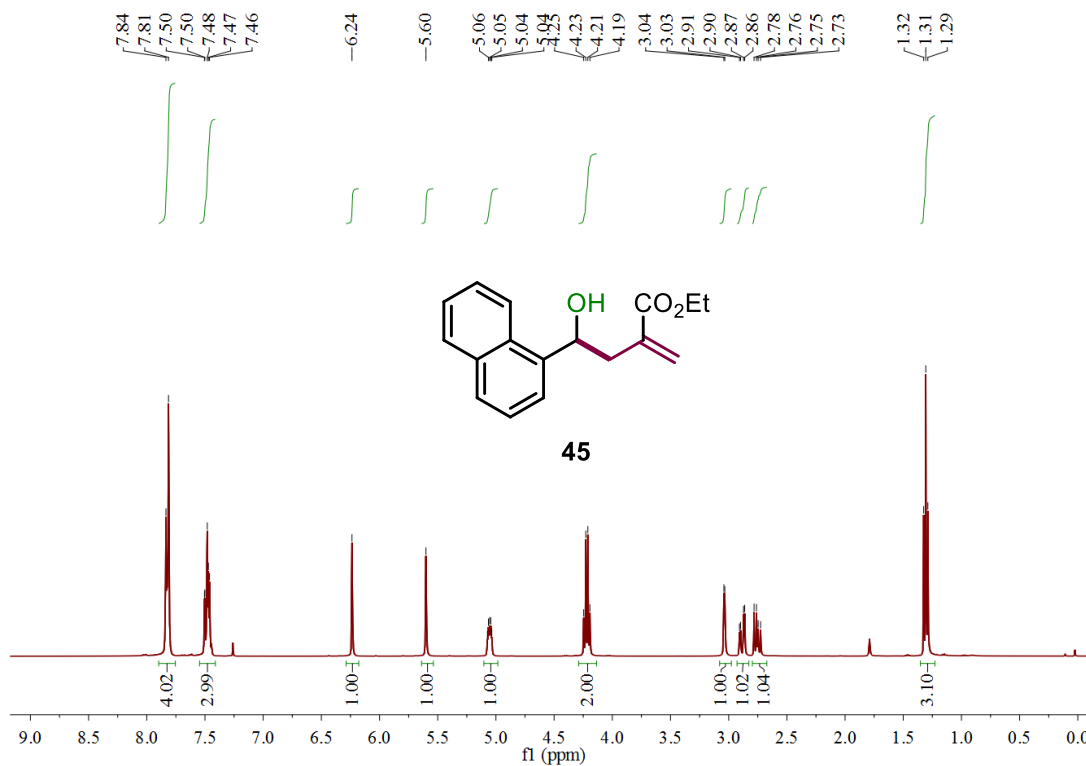

**<sup>13</sup>C NMR (100 MHz, CDCl<sub>3</sub>) spectrum of compound 45**

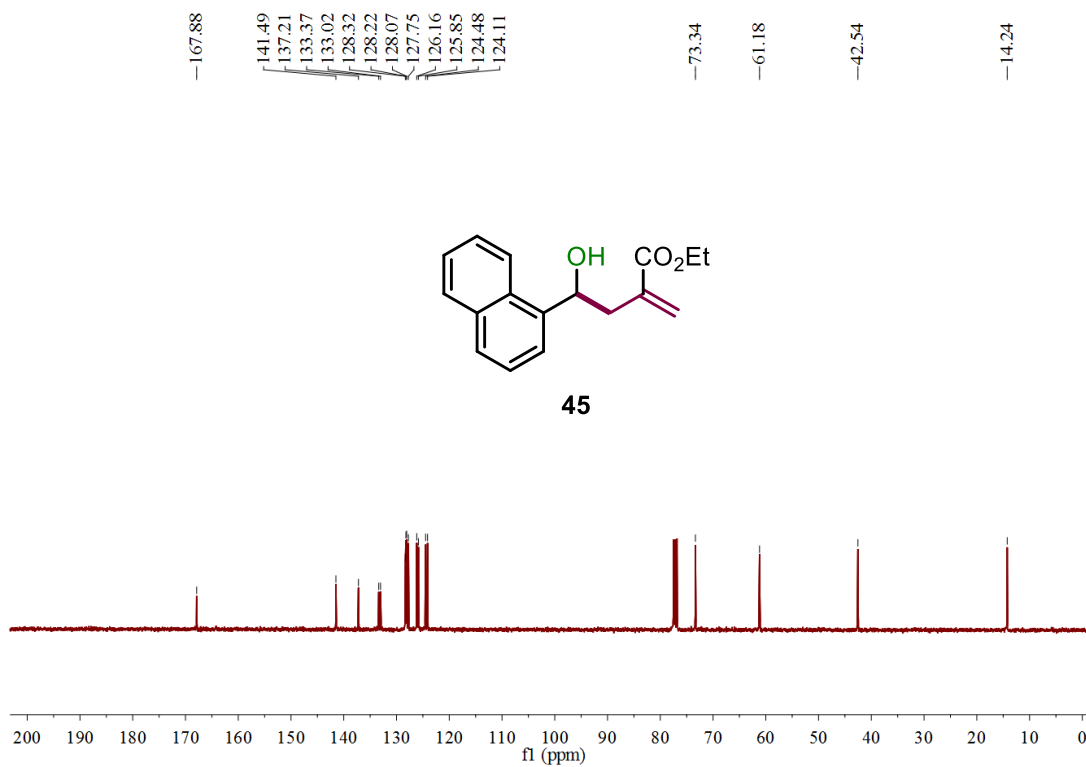



**<sup>1</sup>H NMR (400 MHz, CDCl<sub>3</sub>) spectrum of compound 46**

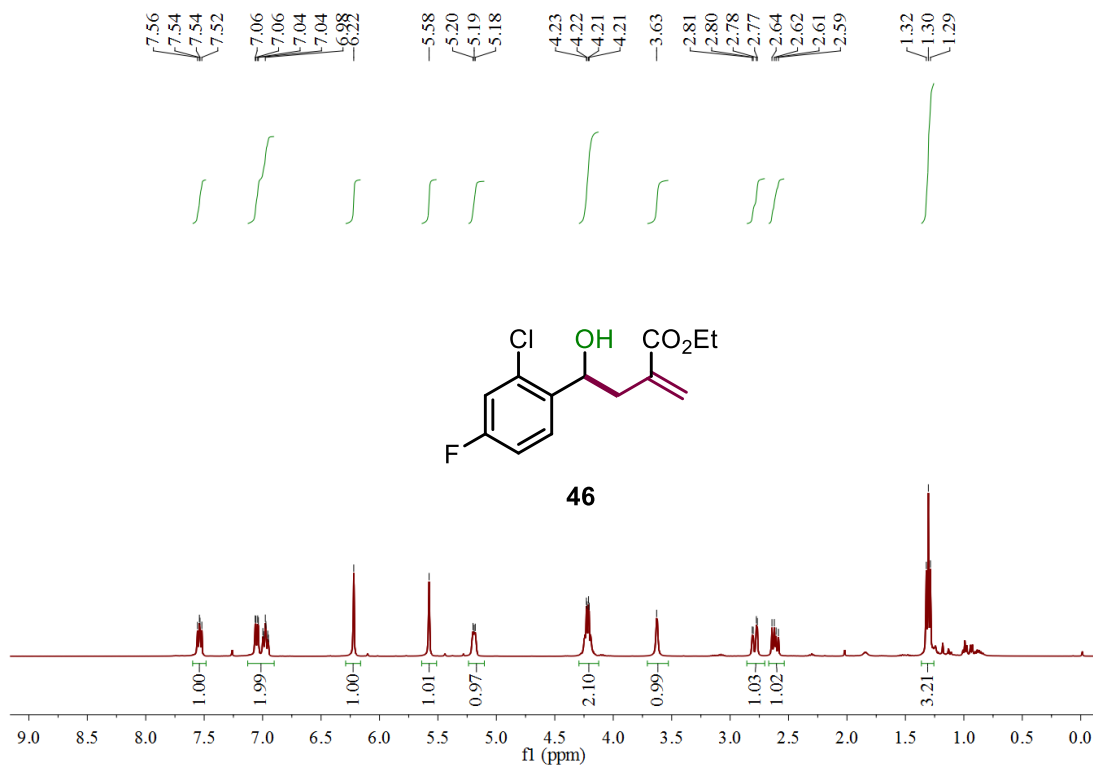

**<sup>13</sup>C NMR (100 MHz, CDCl<sub>3</sub>) spectrum of compound 46**

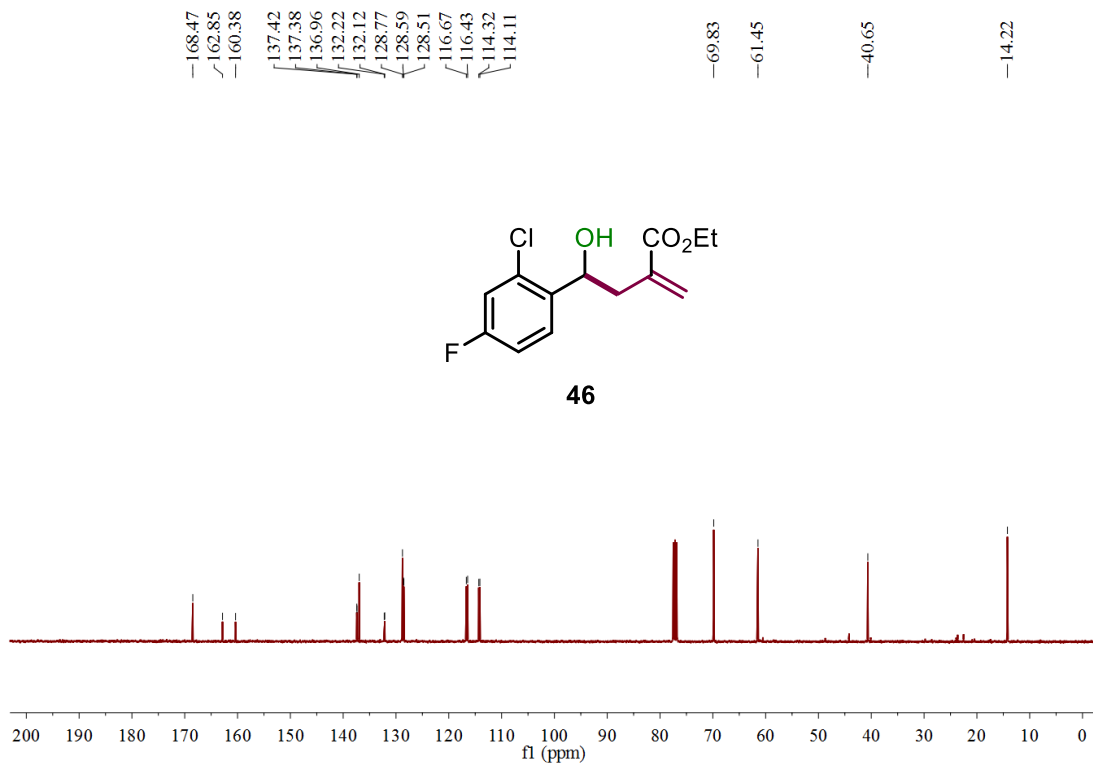

**$^{19}\text{F}$  NMR (376 MHz,  $\text{CDCl}_3$ ) spectrum of compound 46**

-113.69

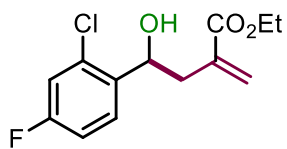

**46**

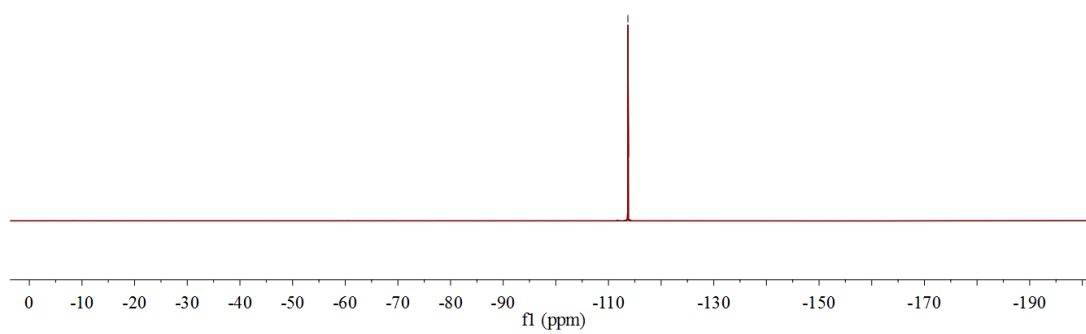

**<sup>1</sup>H NMR (400 MHz, CDCl<sub>3</sub>) spectrum of compound 47**

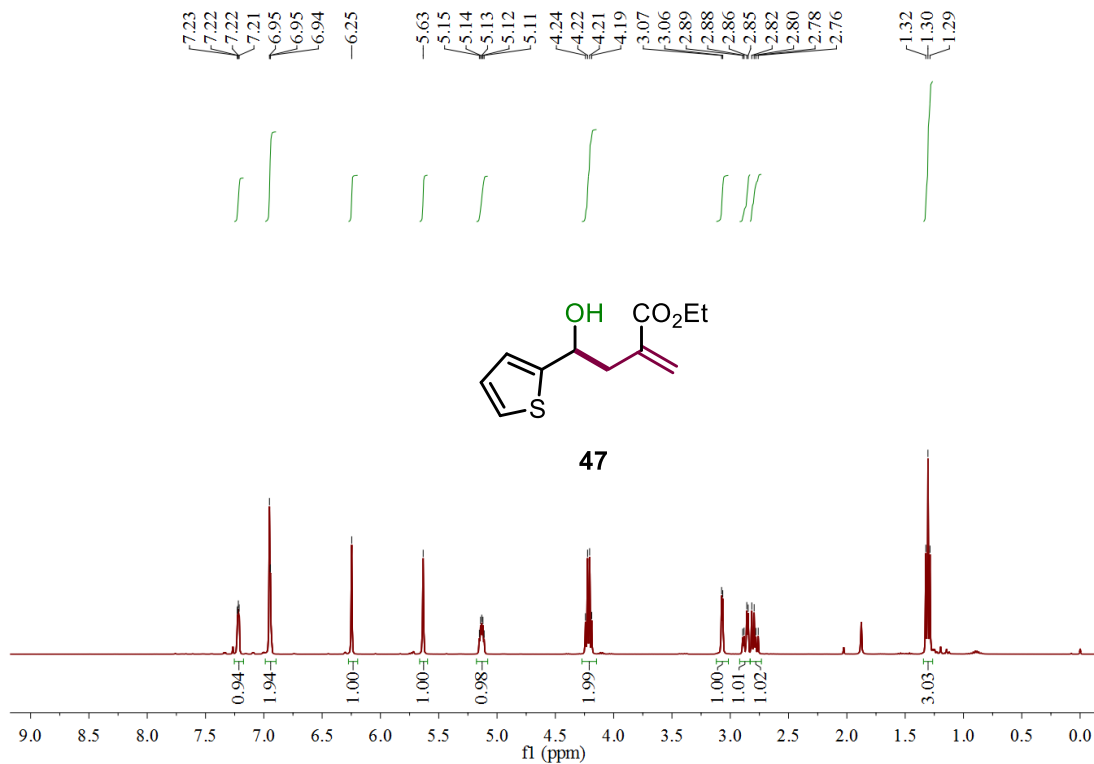

**<sup>13</sup>C NMR (100 MHz, CDCl<sub>3</sub>) spectrum of compound 47**

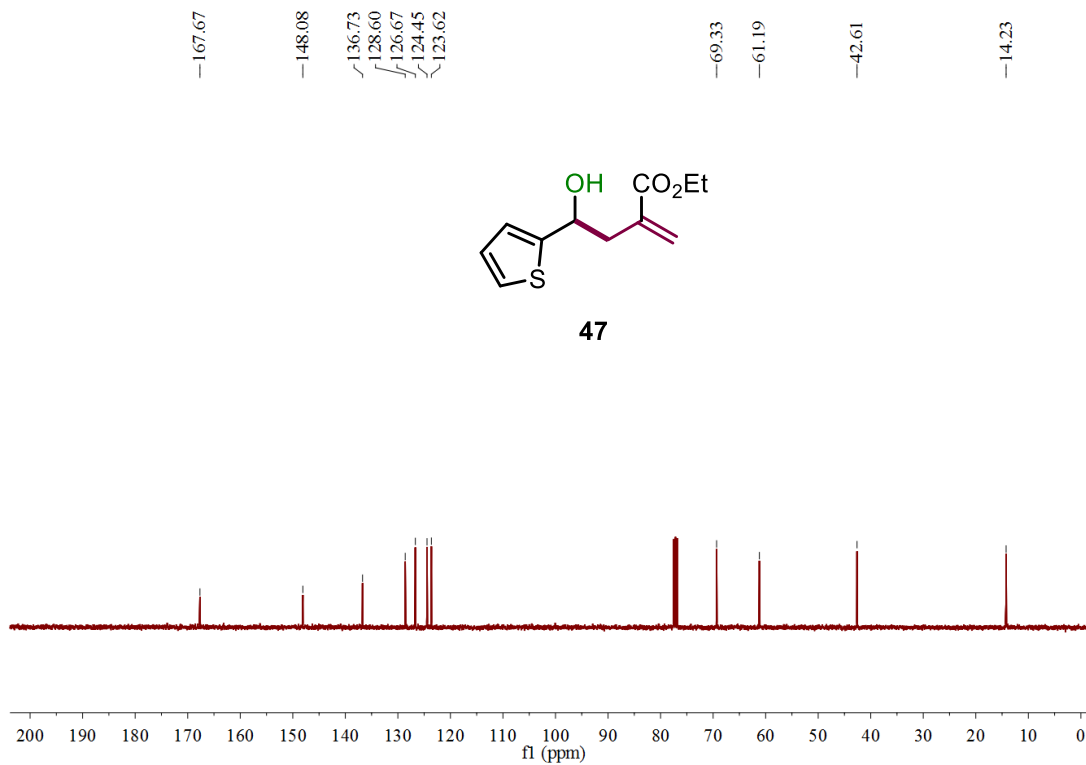

**<sup>1</sup>H NMR (400 MHz, CDCl<sub>3</sub>) spectrum of compound 48**

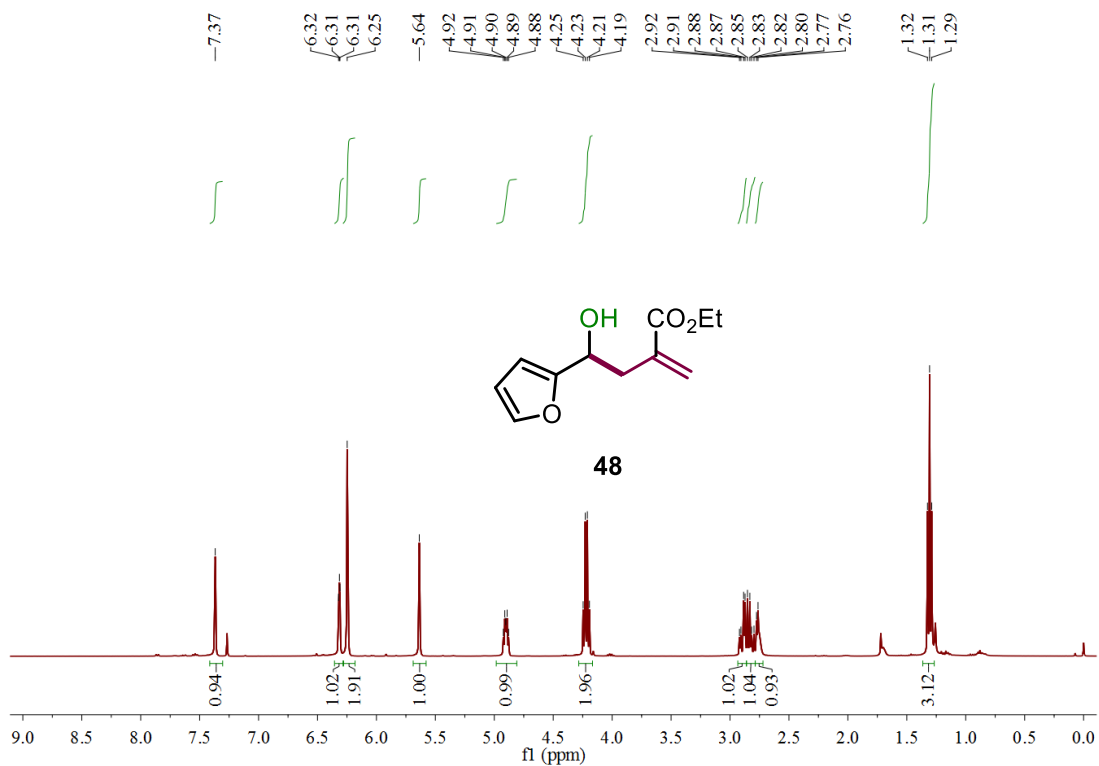

**<sup>13</sup>C NMR (100 MHz, CDCl<sub>3</sub>) spectrum of compound 48**

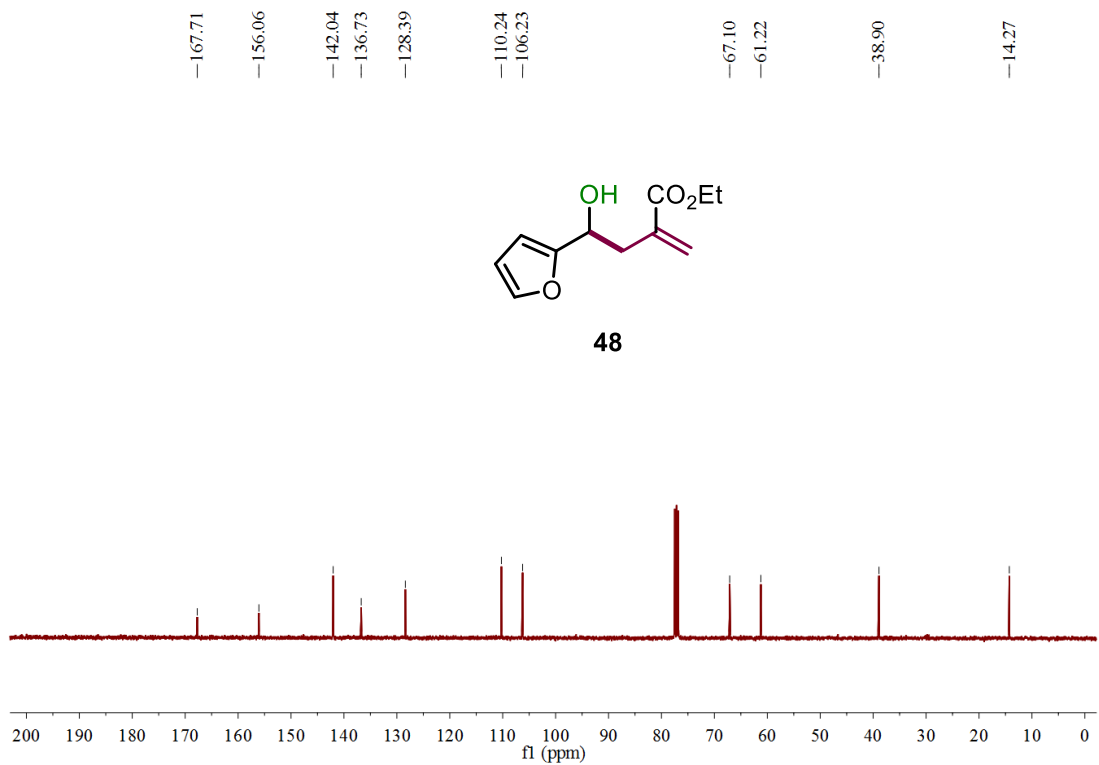

**<sup>1</sup>H NMR (400 MHz, CDCl<sub>3</sub>) spectrum of compound 49**

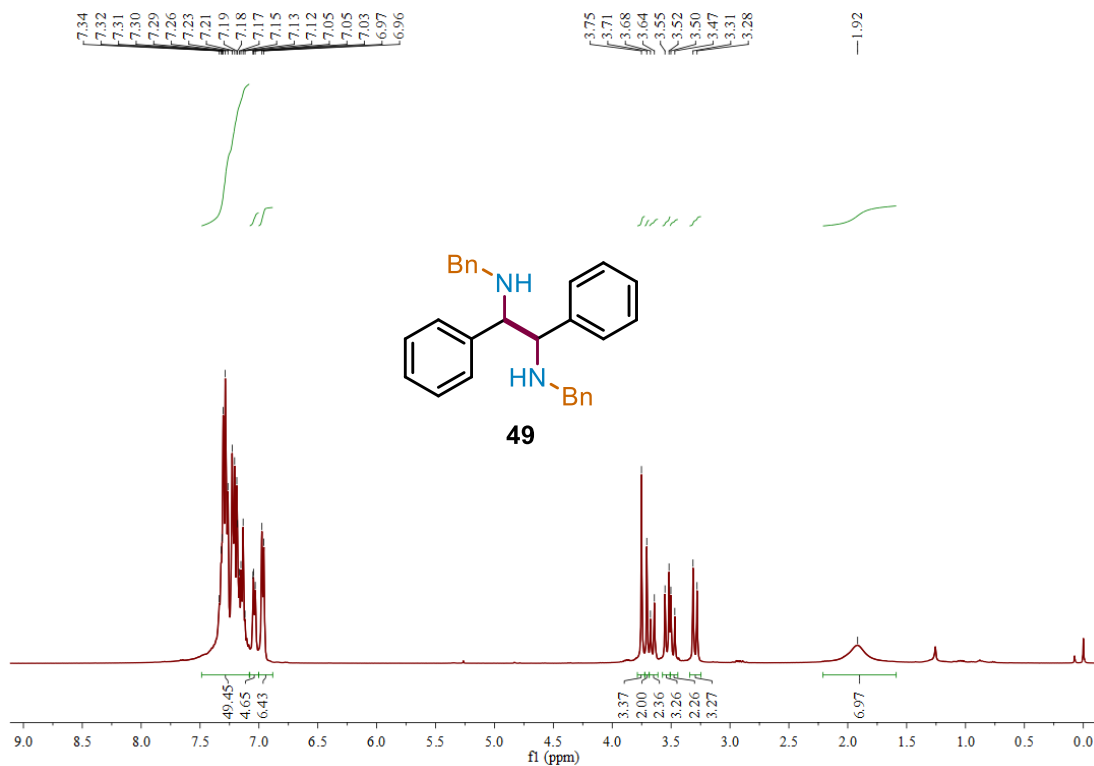

**<sup>13</sup>C NMR (100 MHz, CDCl<sub>3</sub>) spectrum of compound 49**

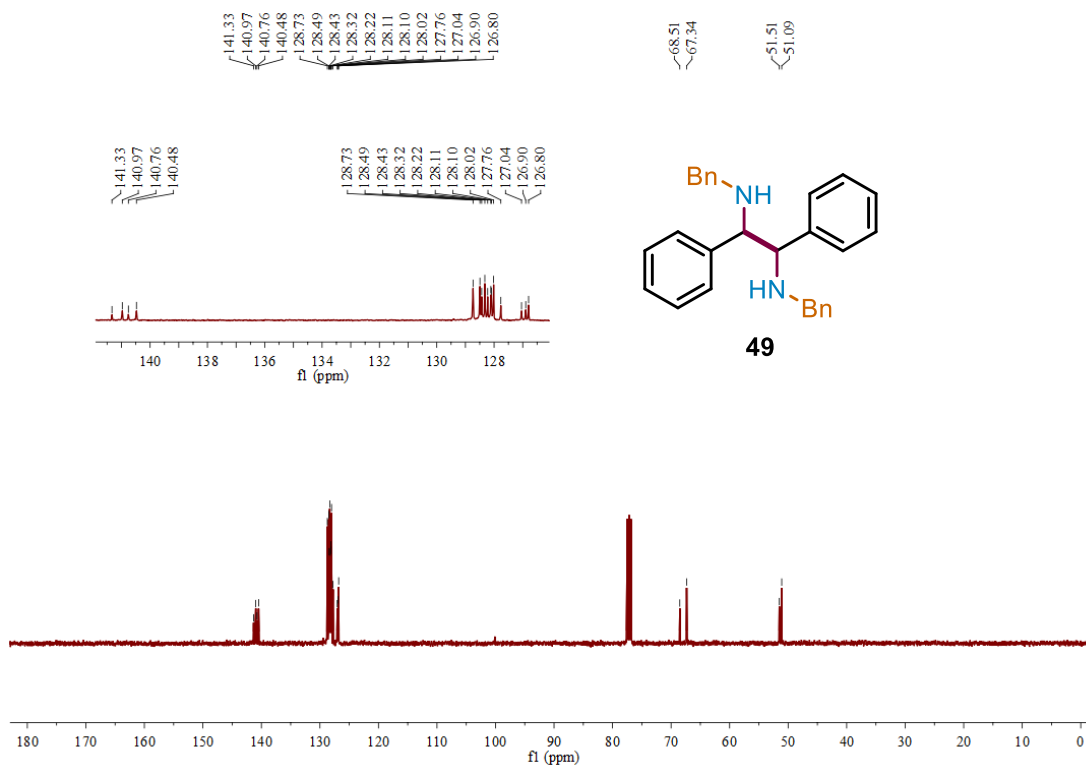

**<sup>1</sup>H NMR (400 MHz, CDCl<sub>3</sub>) spectrum of compound 50**

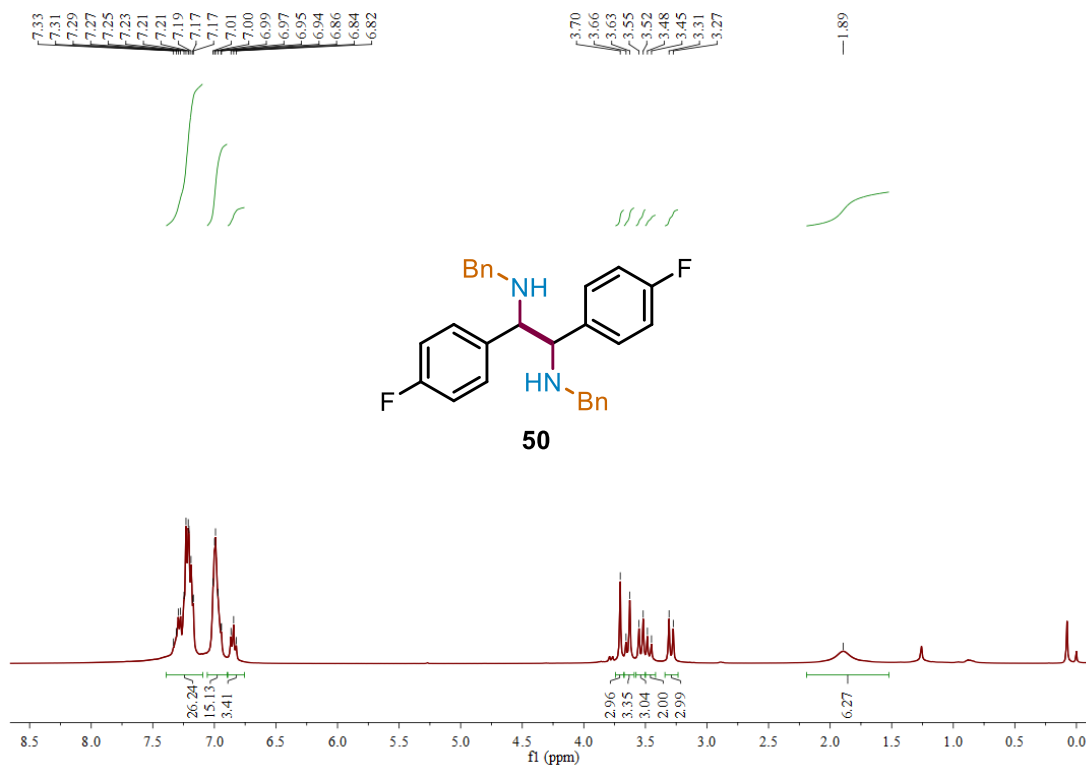

**<sup>13</sup>C NMR (100 MHz, CDCl<sub>3</sub>) spectrum of compound 50**

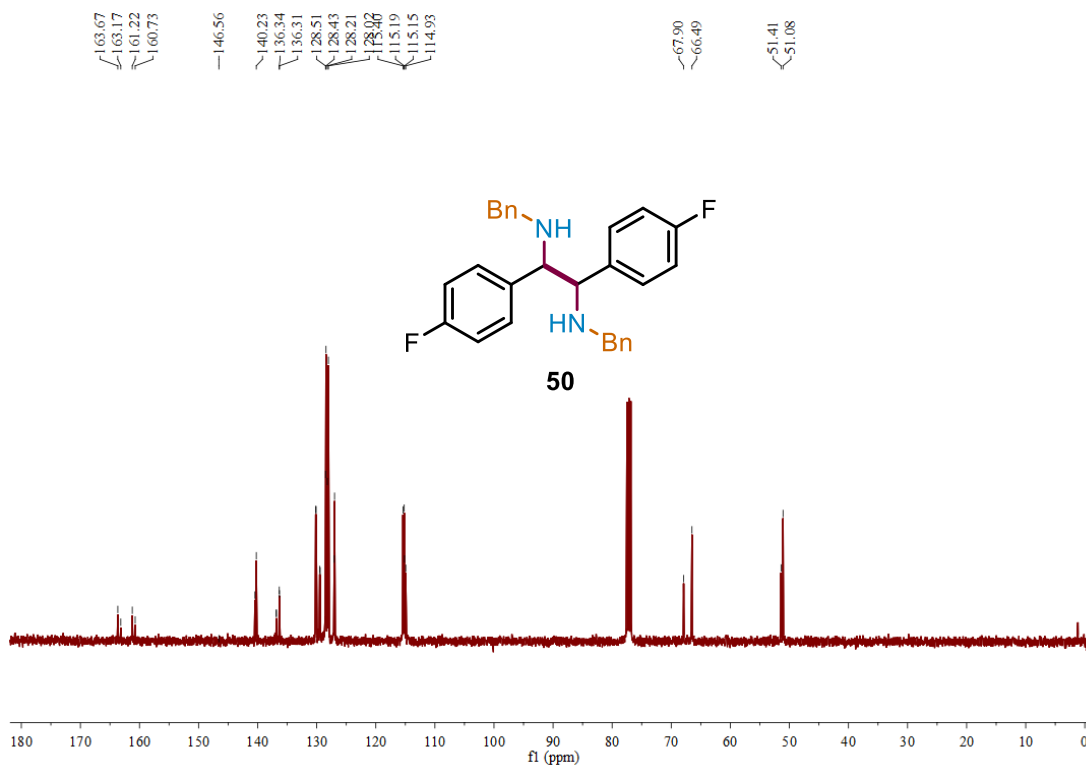

**<sup>19</sup>F NMR (376 MHz, CDCl<sub>3</sub>) spectrum of compound 50**

114.89  
115.62

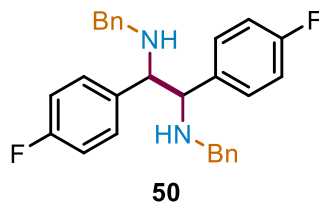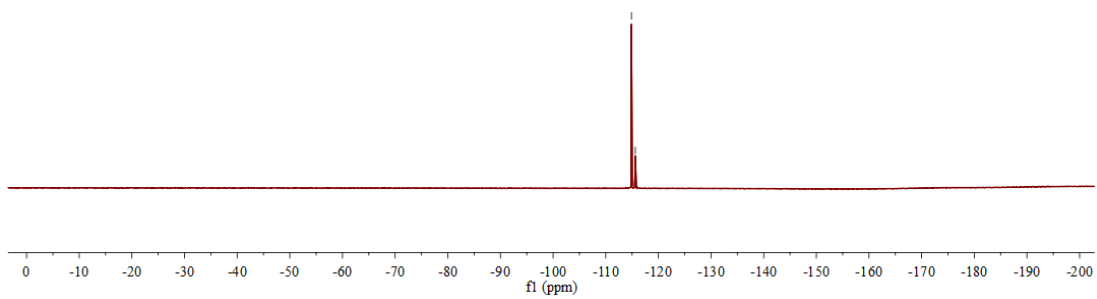

**<sup>1</sup>H NMR (400 MHz, CDCl<sub>3</sub>) spectrum of compound 51**

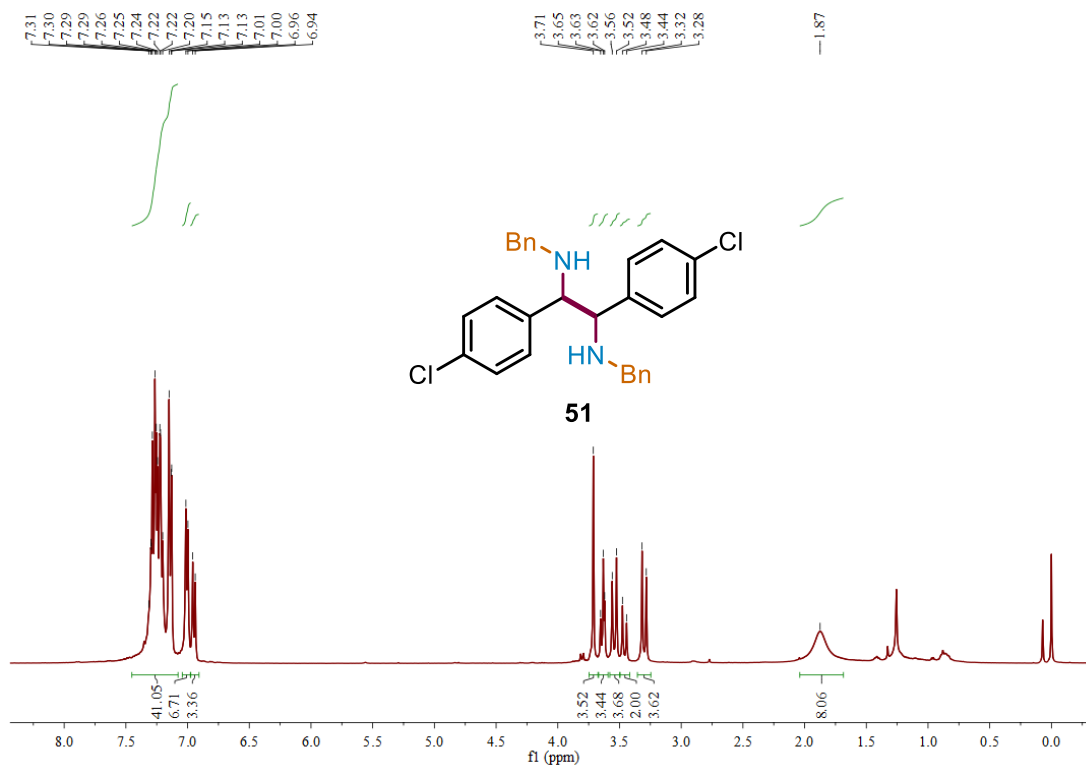

**<sup>13</sup>C NMR (100 MHz, CDCl<sub>3</sub>) spectrum of compound 51**

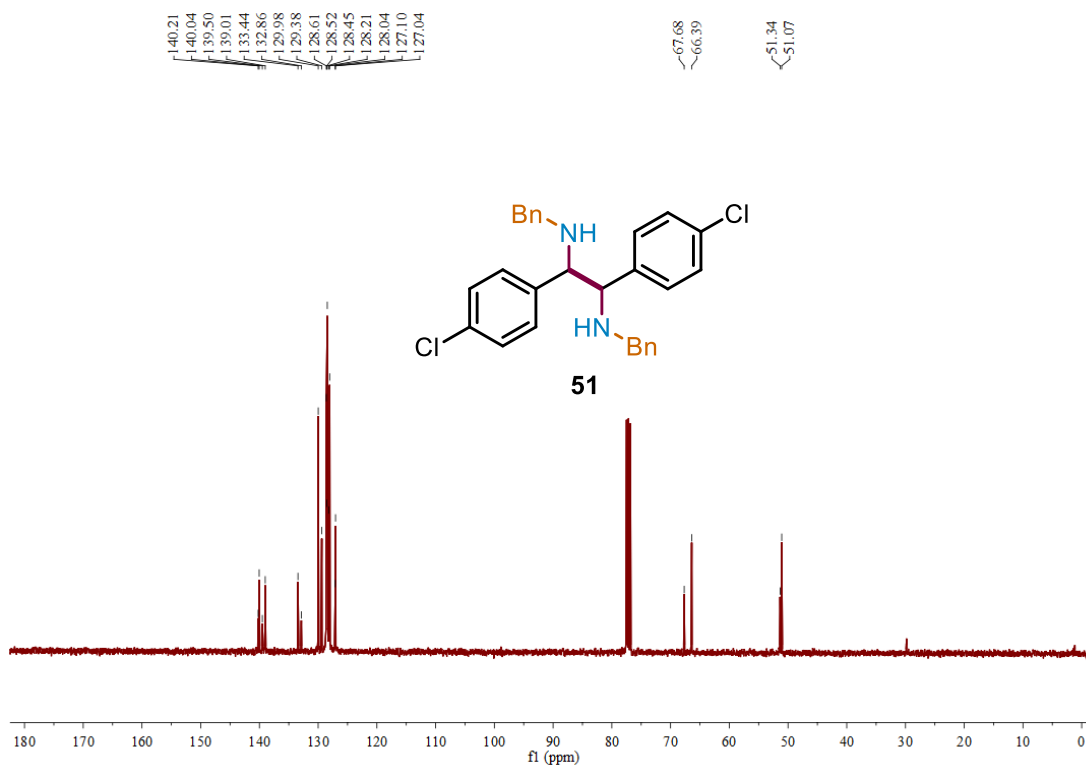



**<sup>1</sup>H NMR (400 MHz, CDCl<sub>3</sub>) spectrum of compound 52**

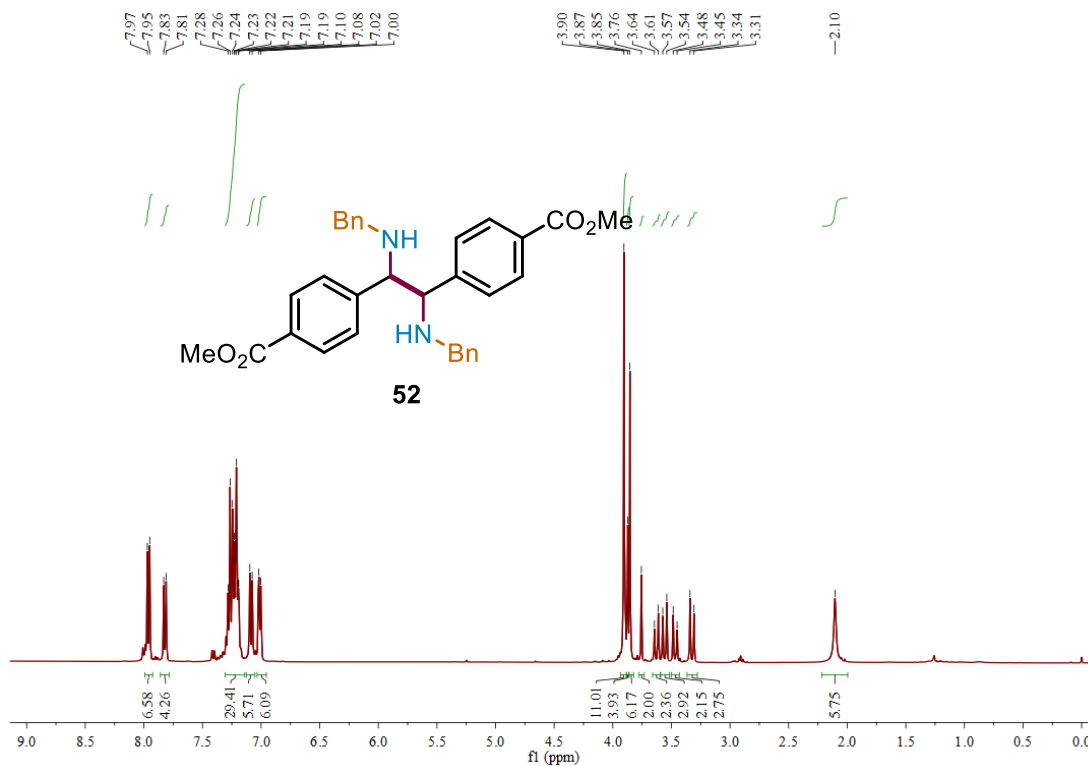

**<sup>13</sup>C NMR (100 MHz, CDCl<sub>3</sub>) spectrum of compound 52**

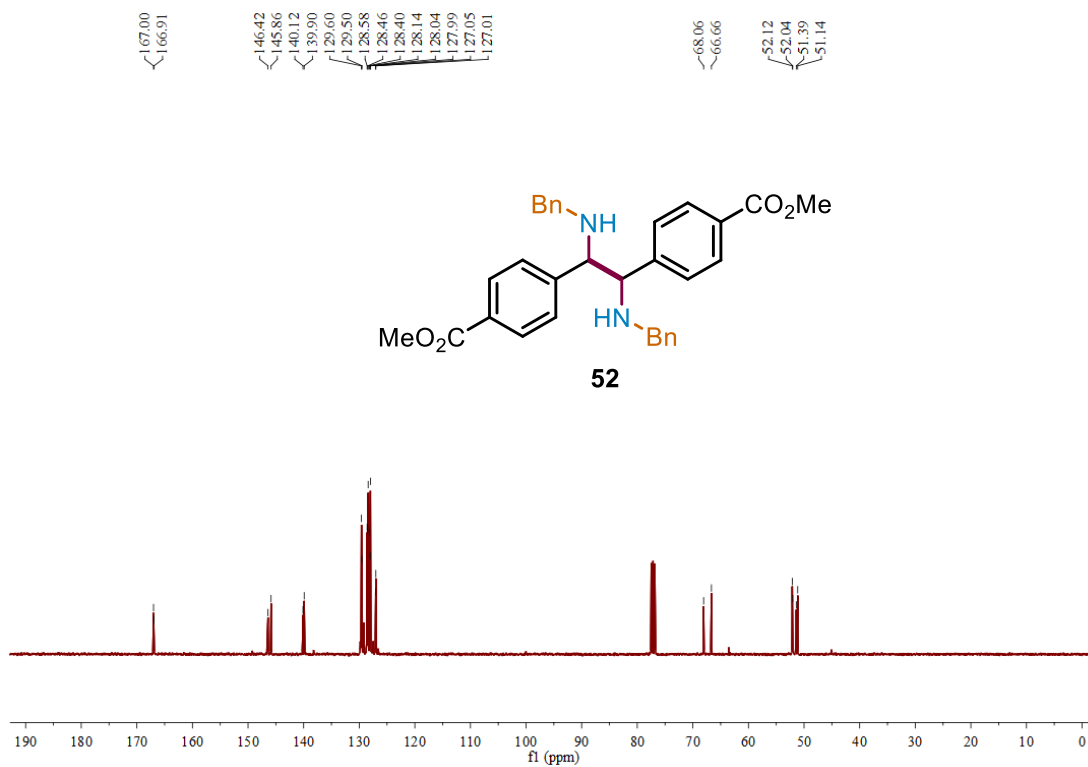

### <sup>1</sup>H NMR (400 MHz, CDCl<sub>3</sub>) spectrum of compound 53

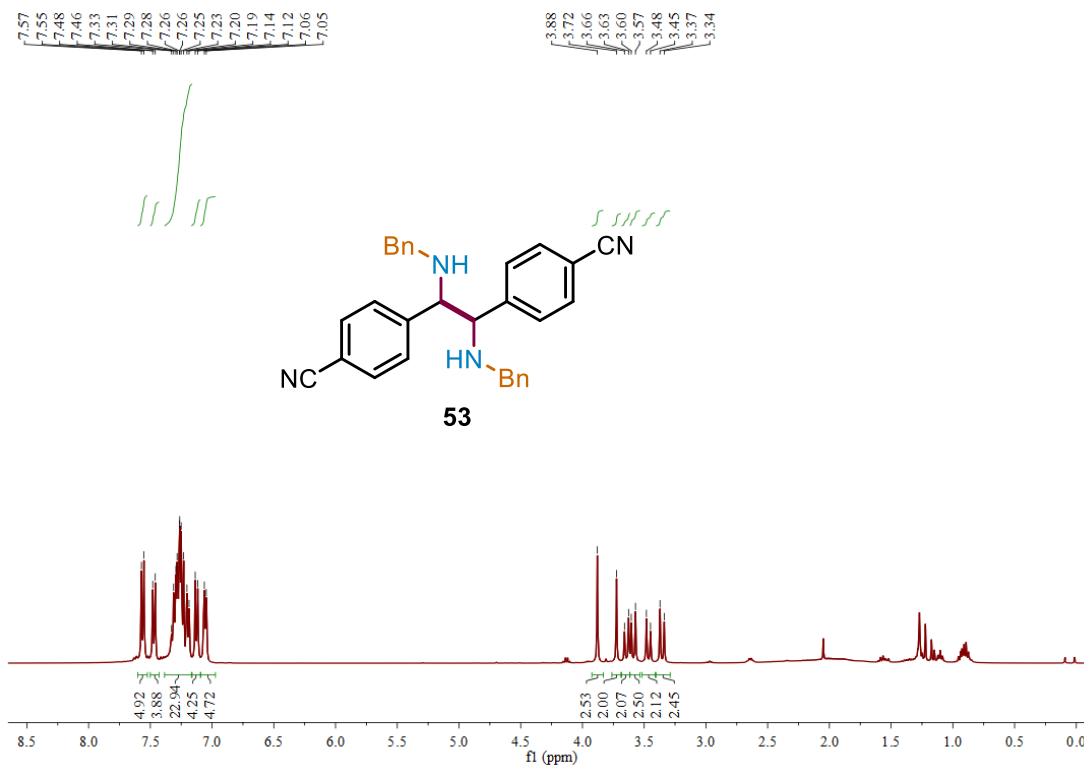

### <sup>13</sup>C NMR (100 MHz, CDCl<sub>3</sub>) spectrum of compound 53

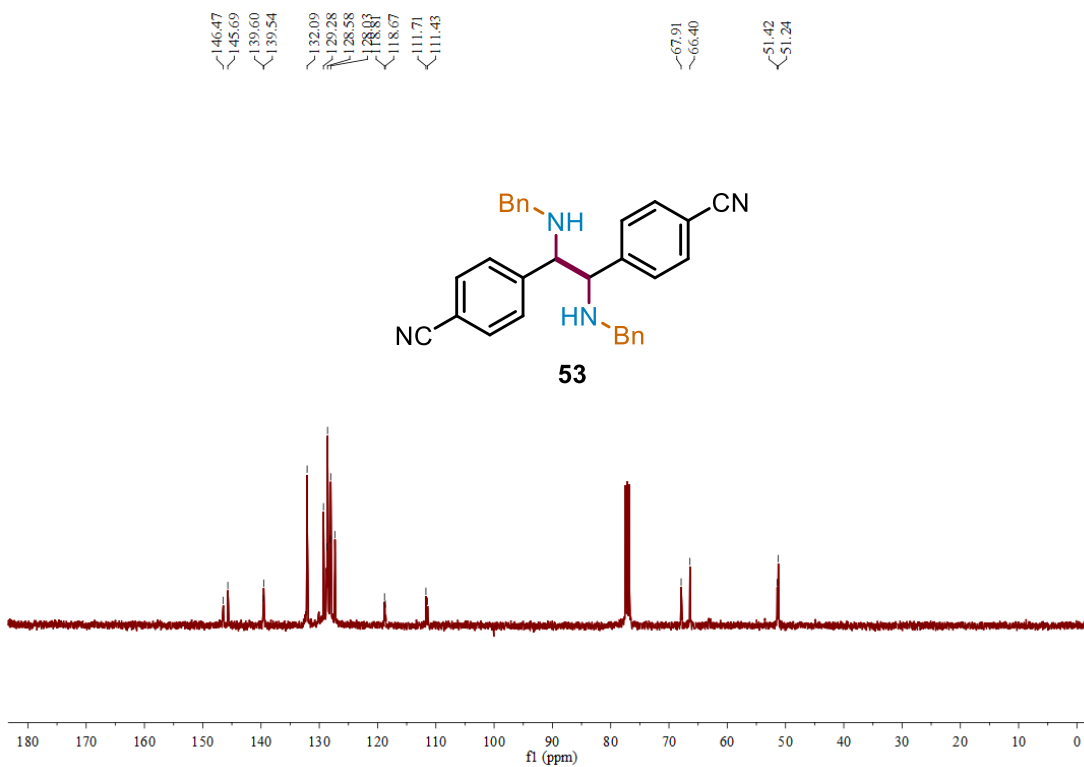

**<sup>1</sup>H NMR (400 MHz, CDCl<sub>3</sub>) spectrum of compound 54**

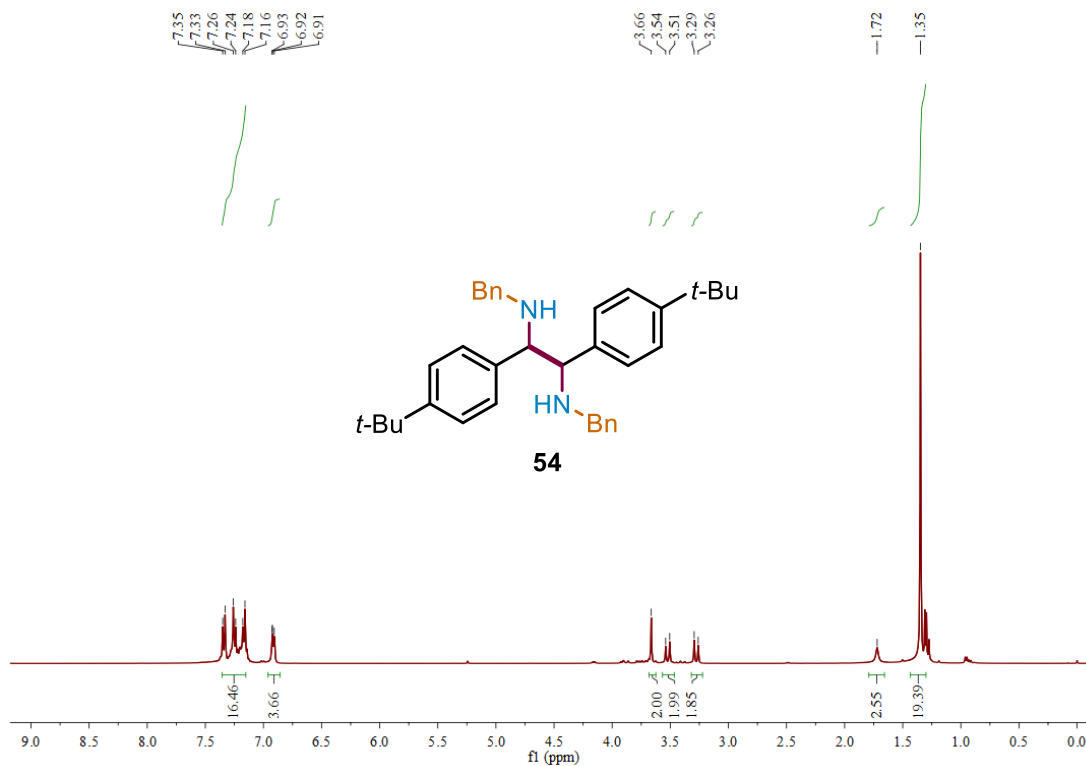

**<sup>13</sup>C NMR (100 MHz, CDCl<sub>3</sub>) spectrum of compound 54**

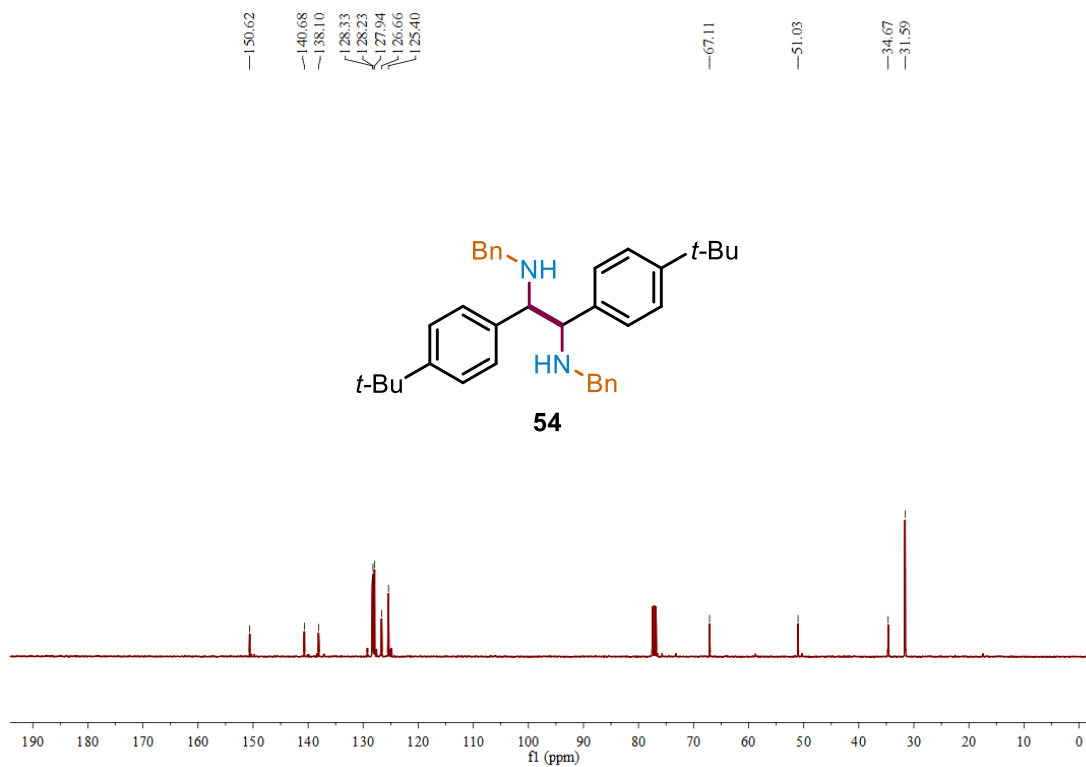

**<sup>1</sup>H NMR (400 MHz, CDCl<sub>3</sub>) spectrum of compound 55**

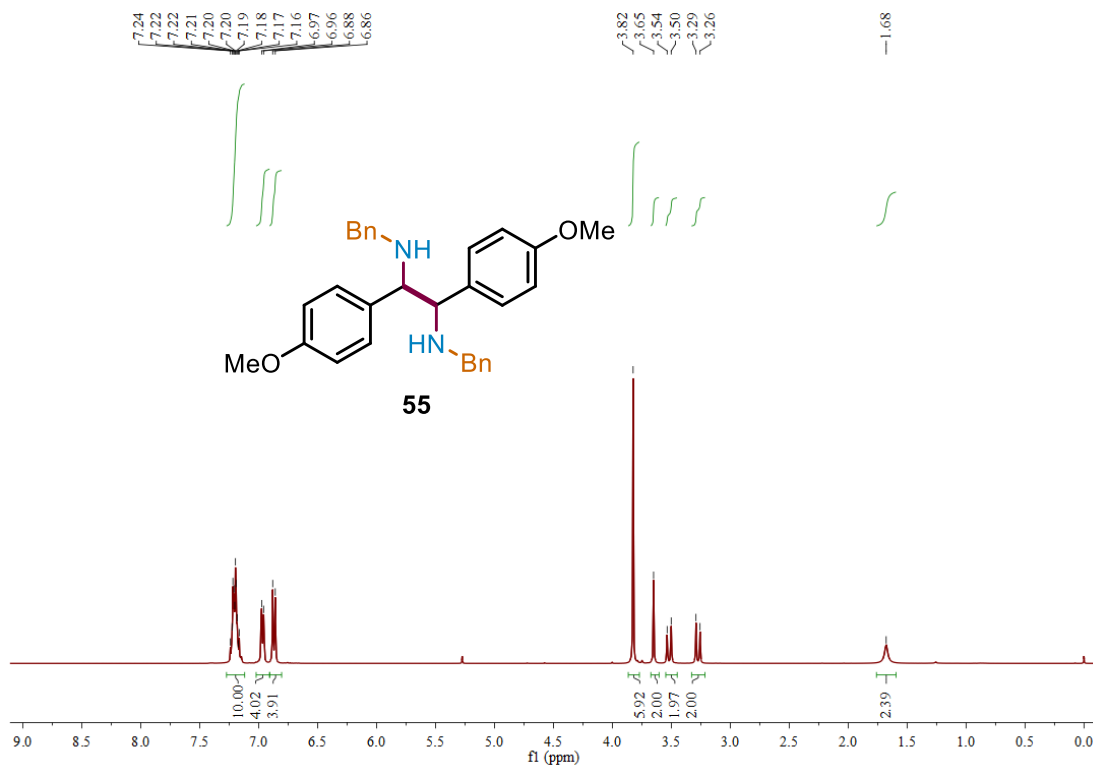

**<sup>13</sup>C NMR (100 MHz, CDCl<sub>3</sub>) spectrum of compound 55**

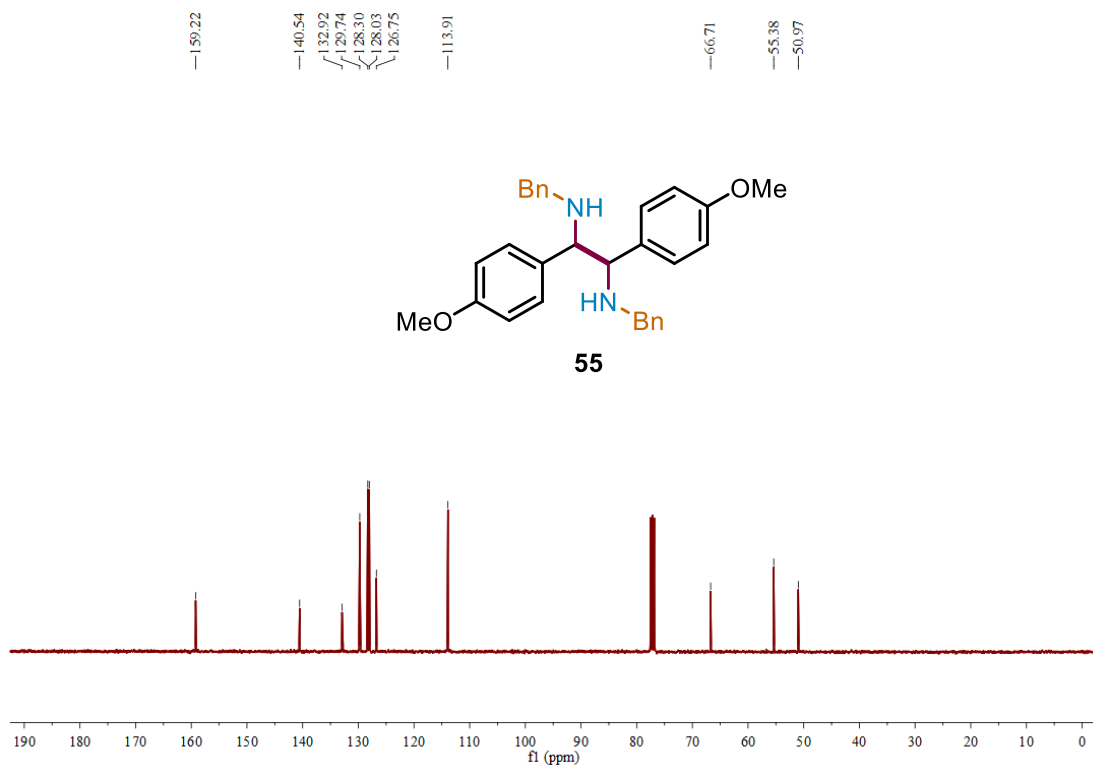

**<sup>1</sup>H NMR (400 MHz, DMSO-*d*<sub>6</sub>) spectrum of compound 56**

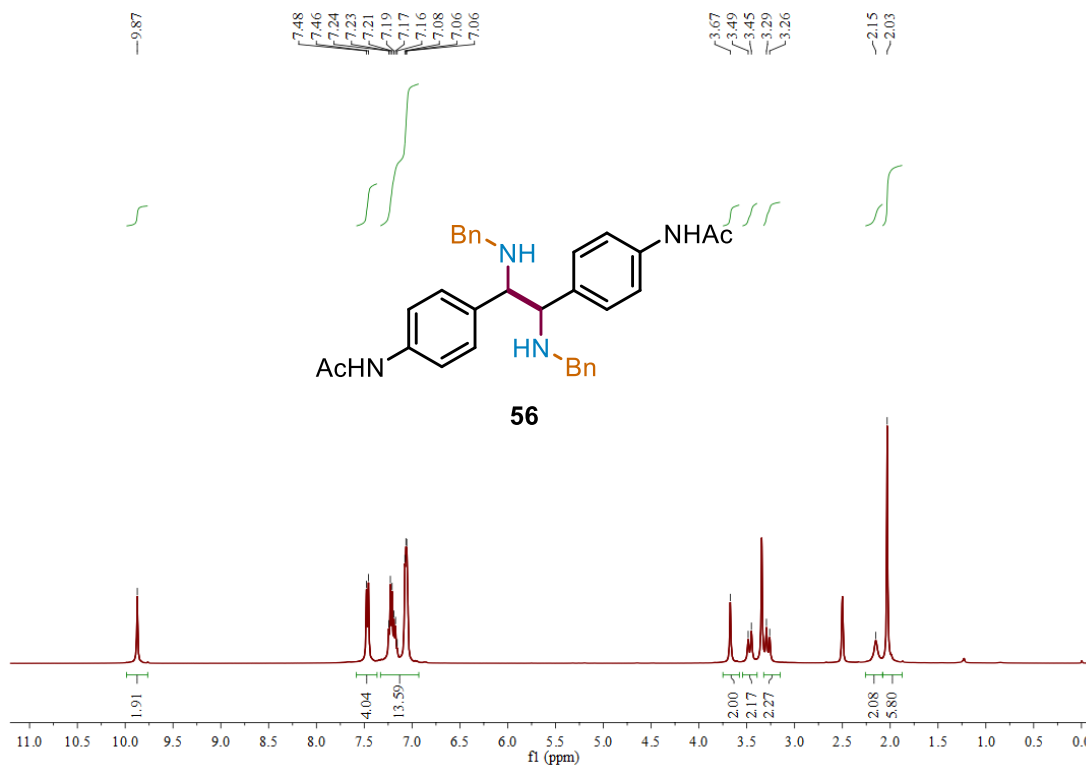

**<sup>13</sup>C NMR (100 MHz, DMSO-*d*<sub>6</sub>) spectrum of compound 56**

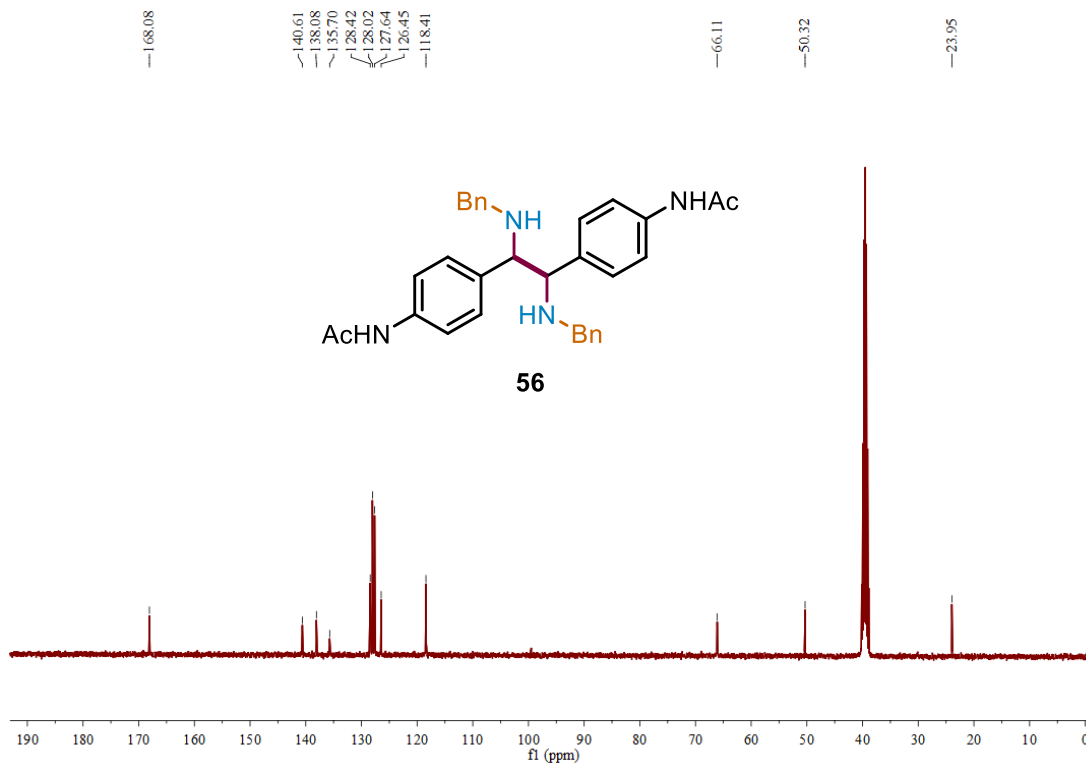

**<sup>1</sup>H NMR (400 MHz, CDCl<sub>3</sub>) spectrum of compound 57**

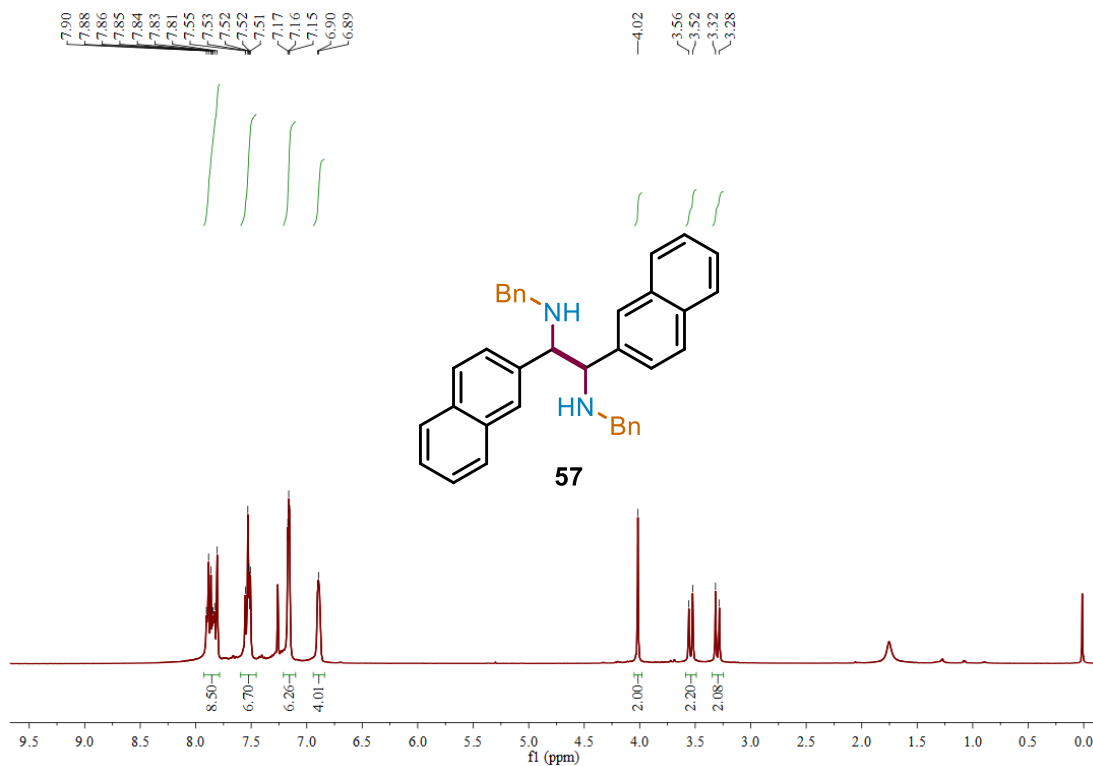

**<sup>13</sup>C NMR (100 MHz, CDCl<sub>3</sub>) spectrum of compound 57**

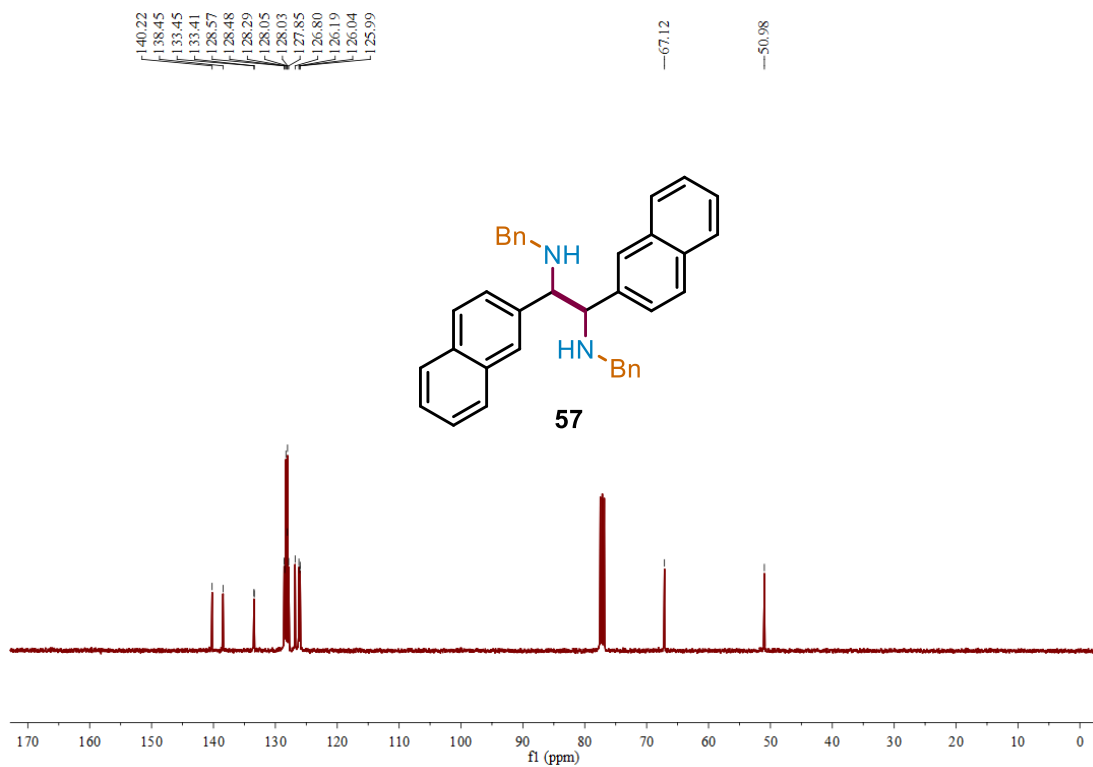

**<sup>1</sup>H NMR (400 MHz, CDCl<sub>3</sub>) spectrum of compound 58**

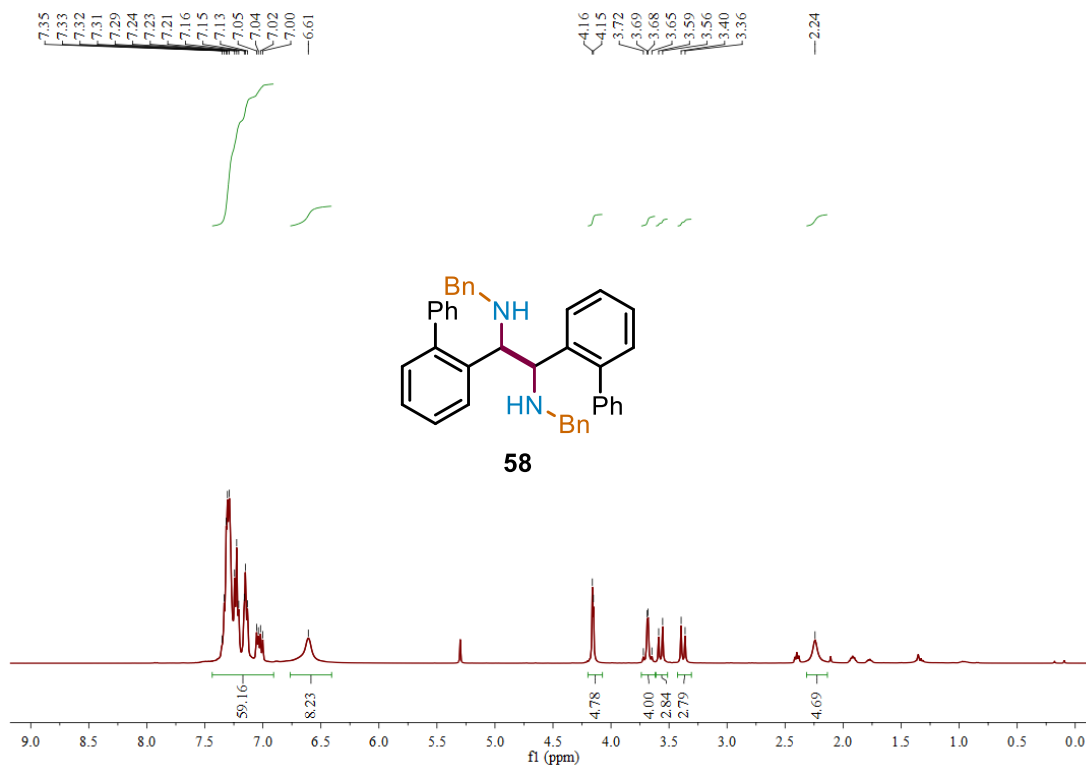

**<sup>13</sup>C NMR (100 MHz, CDCl<sub>3</sub>) spectrum of compound 58**

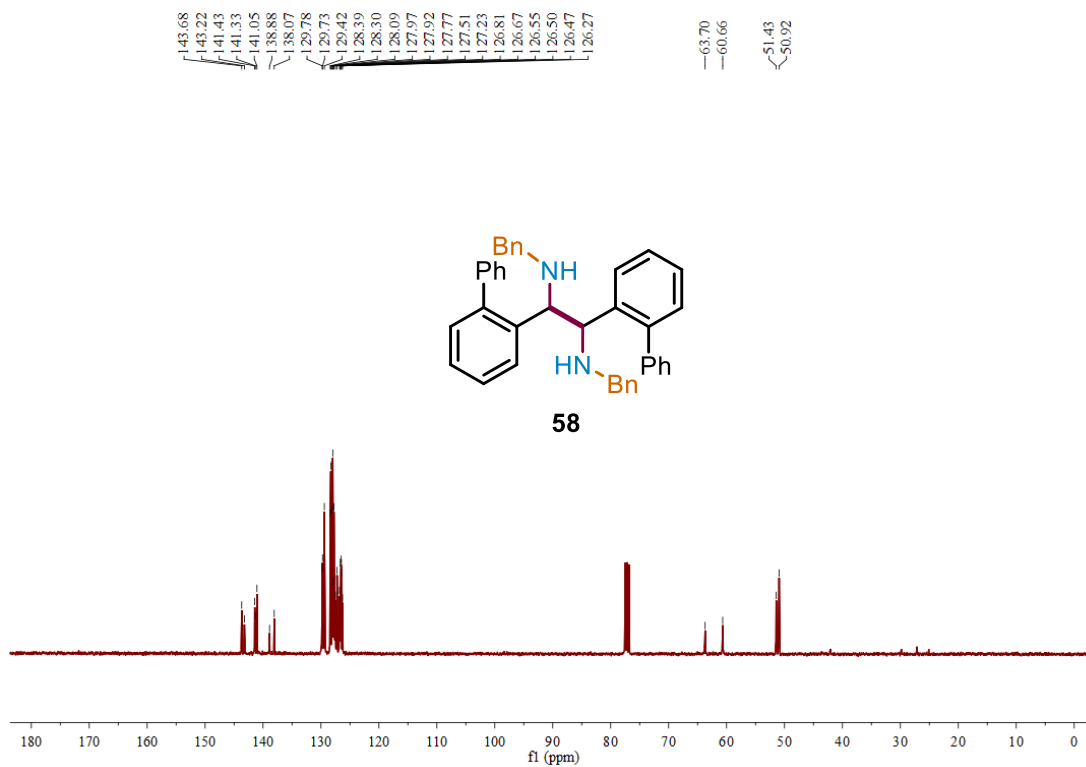

**<sup>1</sup>H NMR (400 MHz, CDCl<sub>3</sub>) spectrum of compound 59**

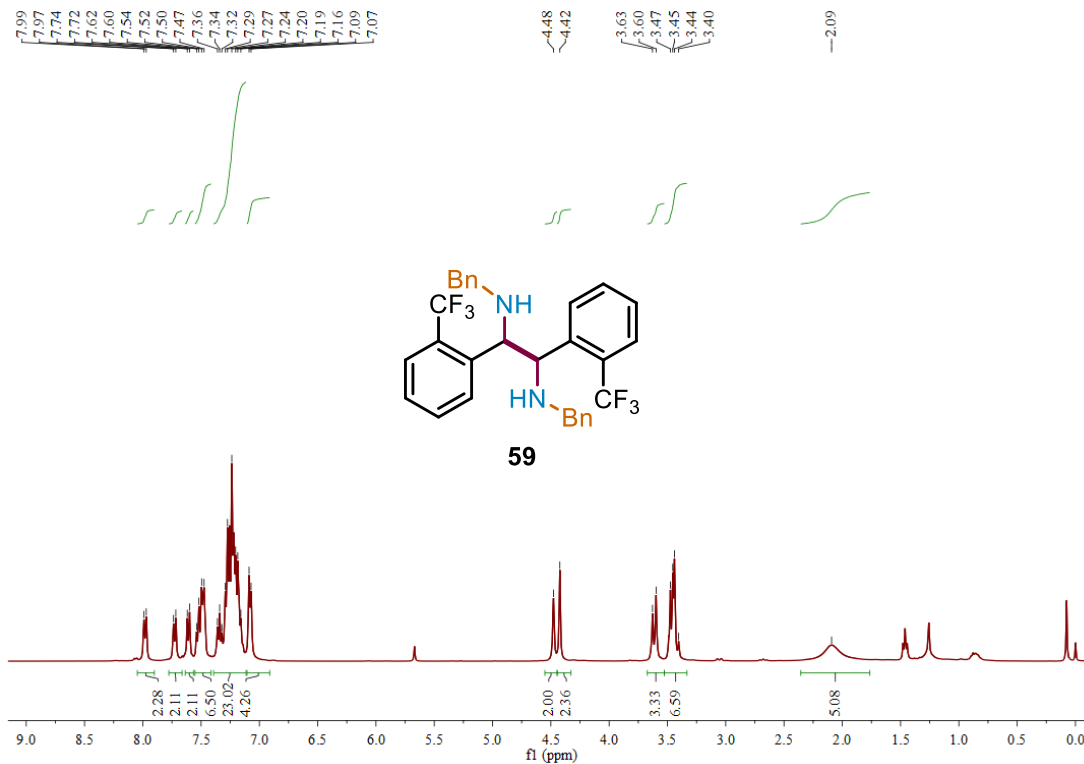

**<sup>13</sup>C NMR (100 MHz, CDCl<sub>3</sub>) spectrum of compound 59**

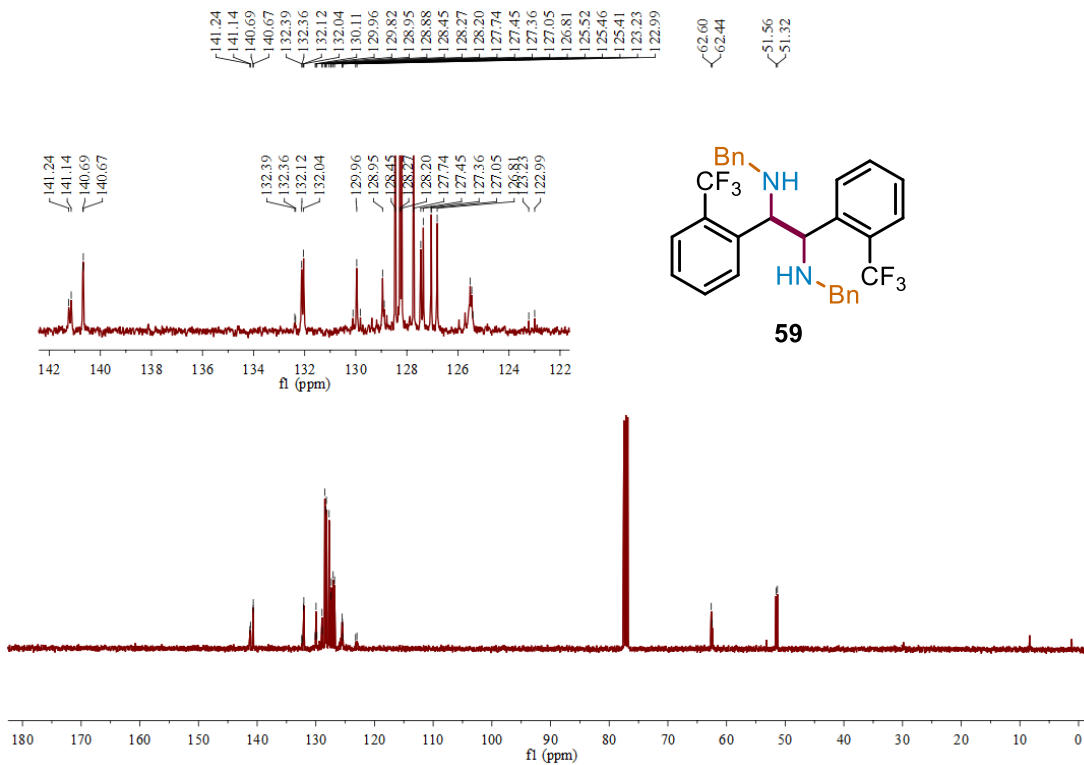



**<sup>19</sup>F NMR (376 MHz, CDCl<sub>3</sub>) spectrum of compound 59**

δ 56.12  
δ 56.07

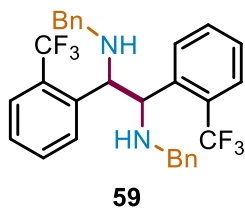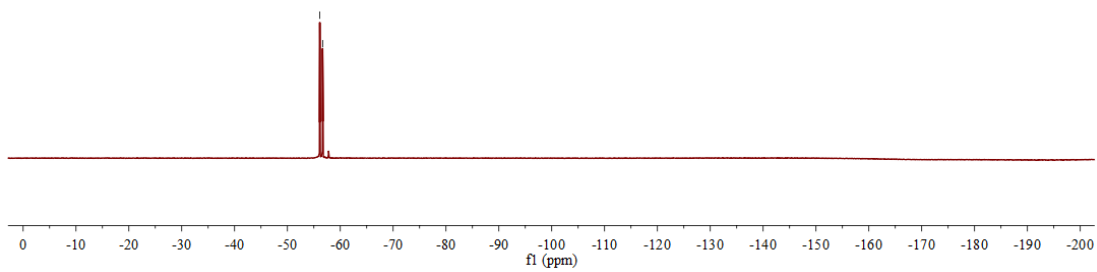

**<sup>1</sup>H NMR (400 MHz, CDCl<sub>3</sub>) spectrum of compound 60**

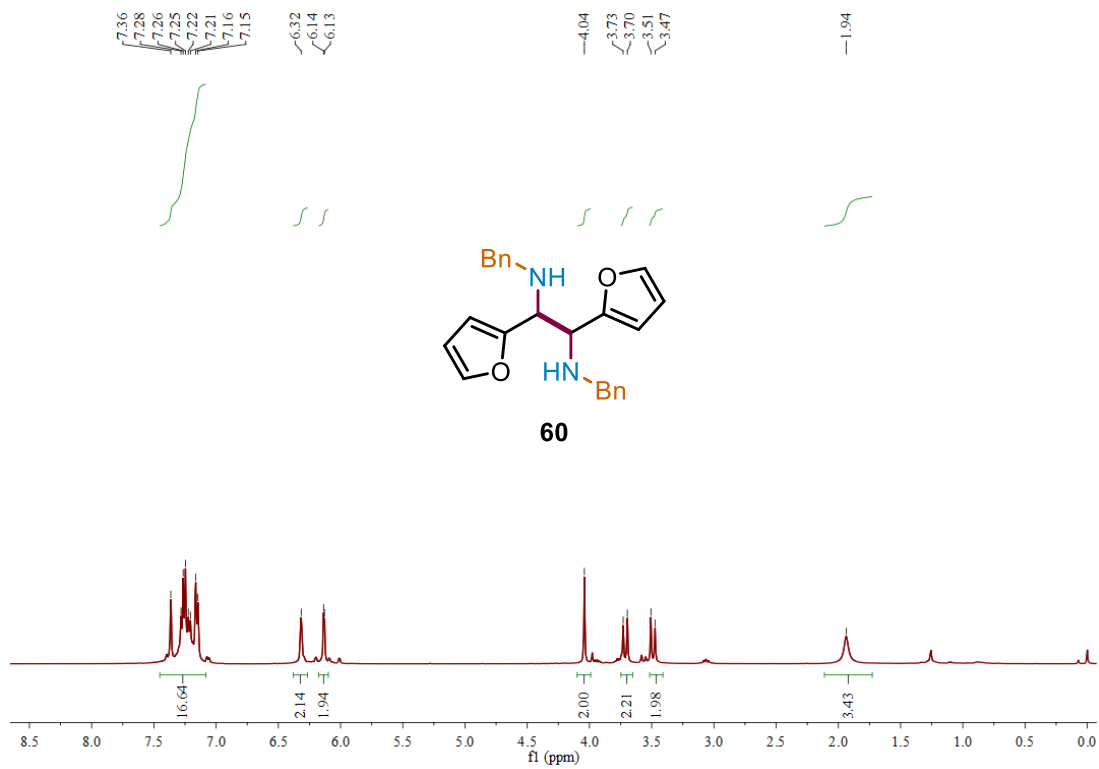

**<sup>13</sup>C NMR (100 MHz, CDCl<sub>3</sub>) spectrum of compound 60**

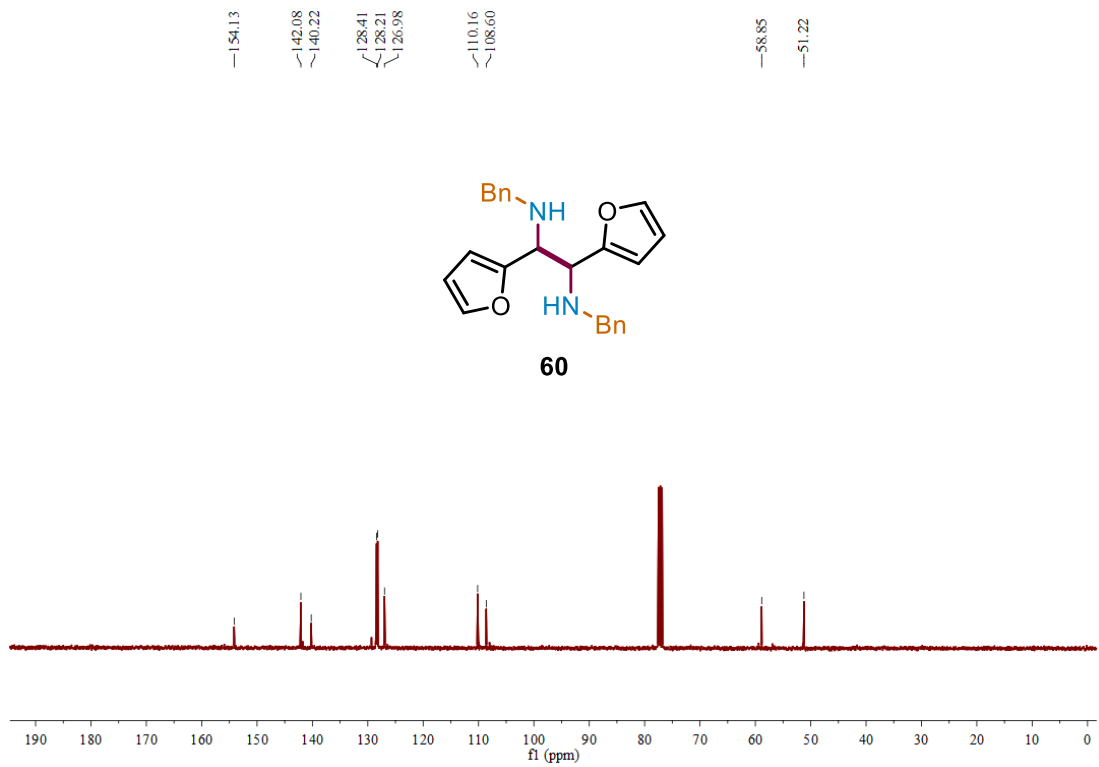

**<sup>1</sup>H NMR (400 MHz, CDCl<sub>3</sub>) spectrum of compound 61**

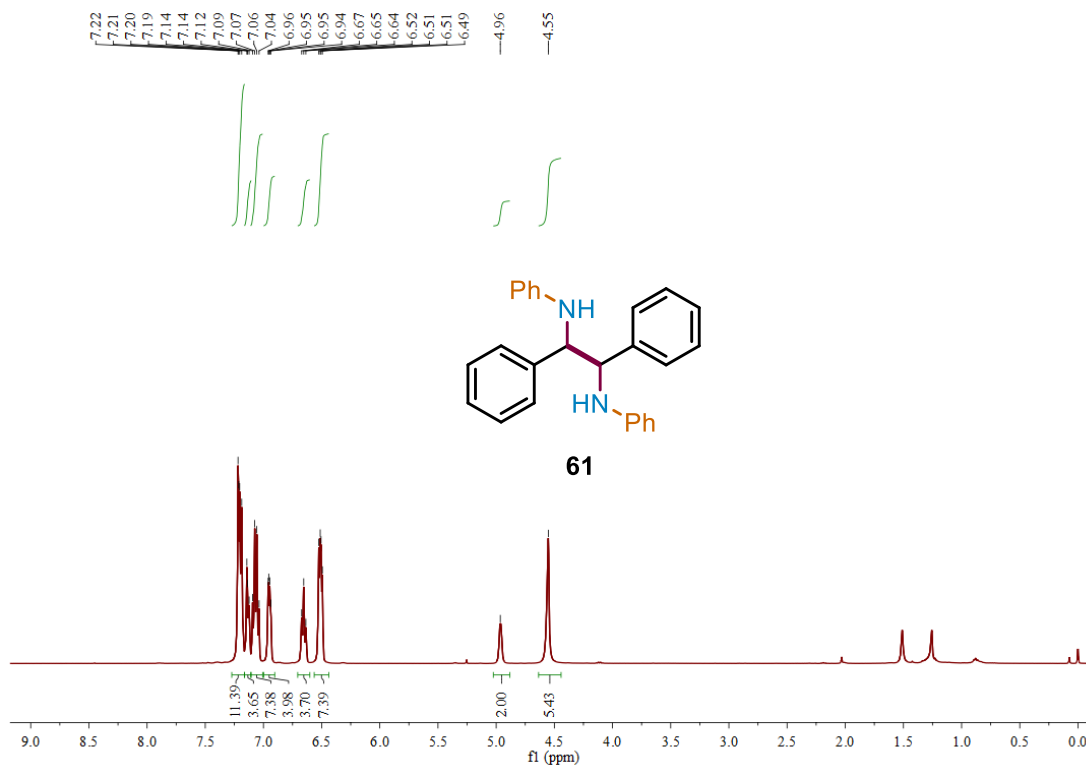

**<sup>13</sup>C NMR (100 MHz, CDCl<sub>3</sub>) spectrum of compound 61**

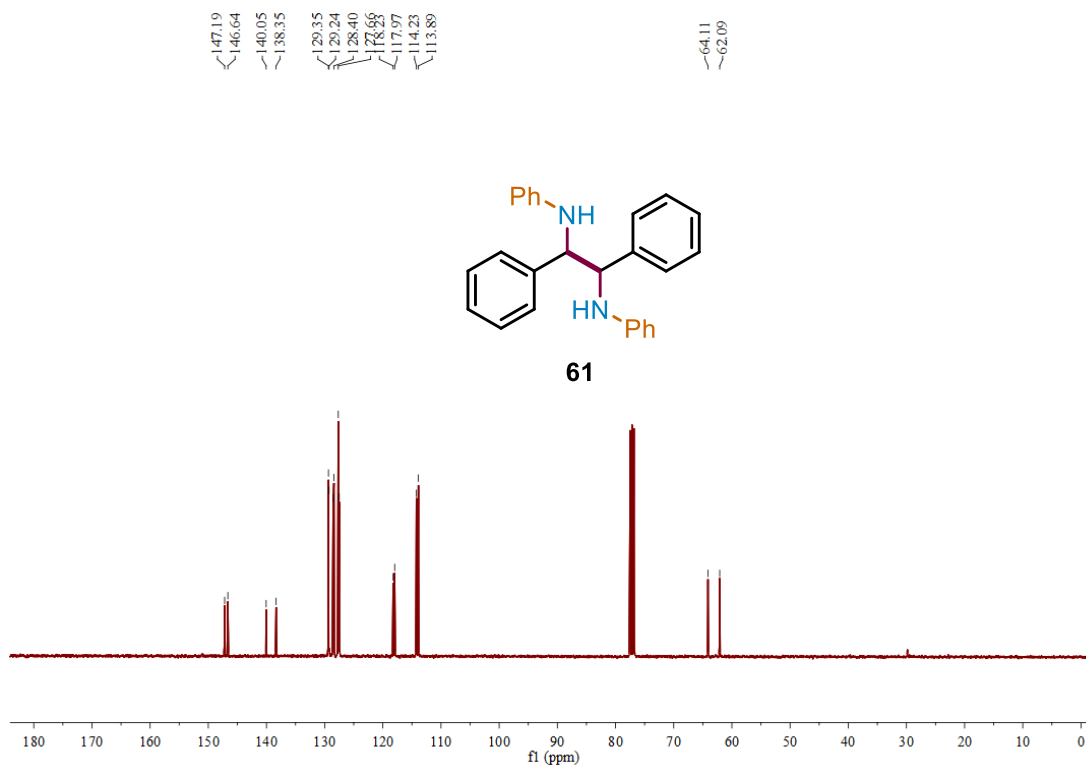

**<sup>1</sup>H NMR (400 MHz, CDCl<sub>3</sub>) spectrum of compound 62**

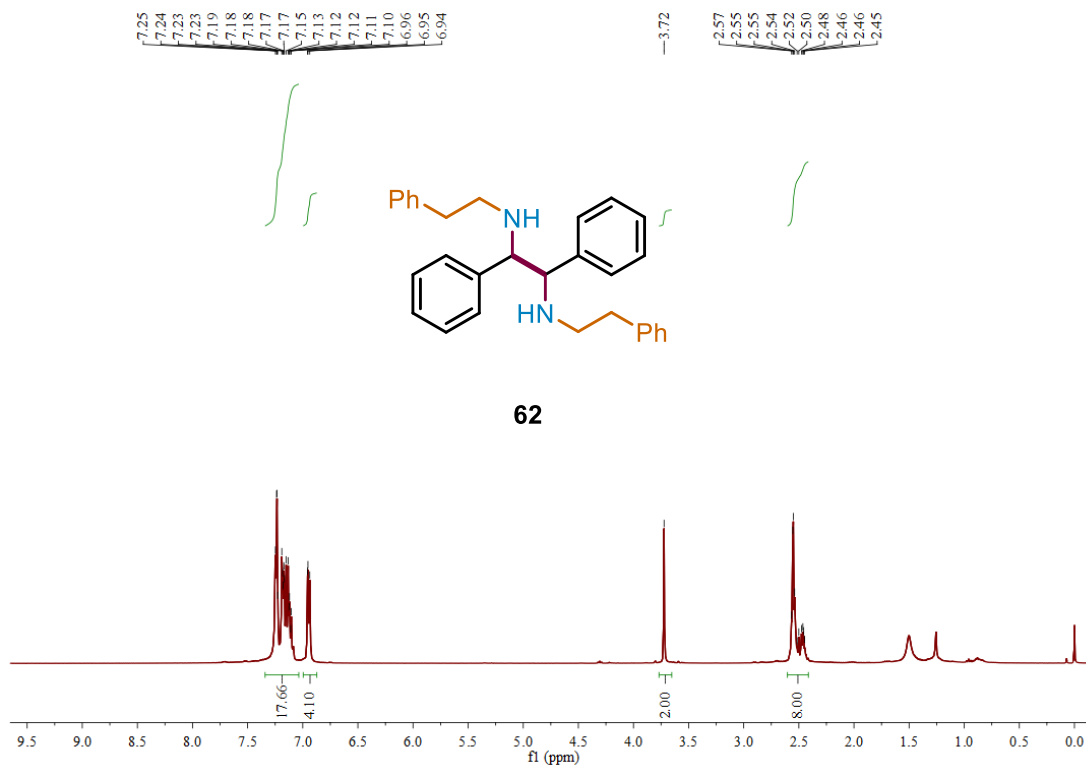

**<sup>13</sup>C NMR (100 MHz, CDCl<sub>3</sub>) spectrum of compound 62**

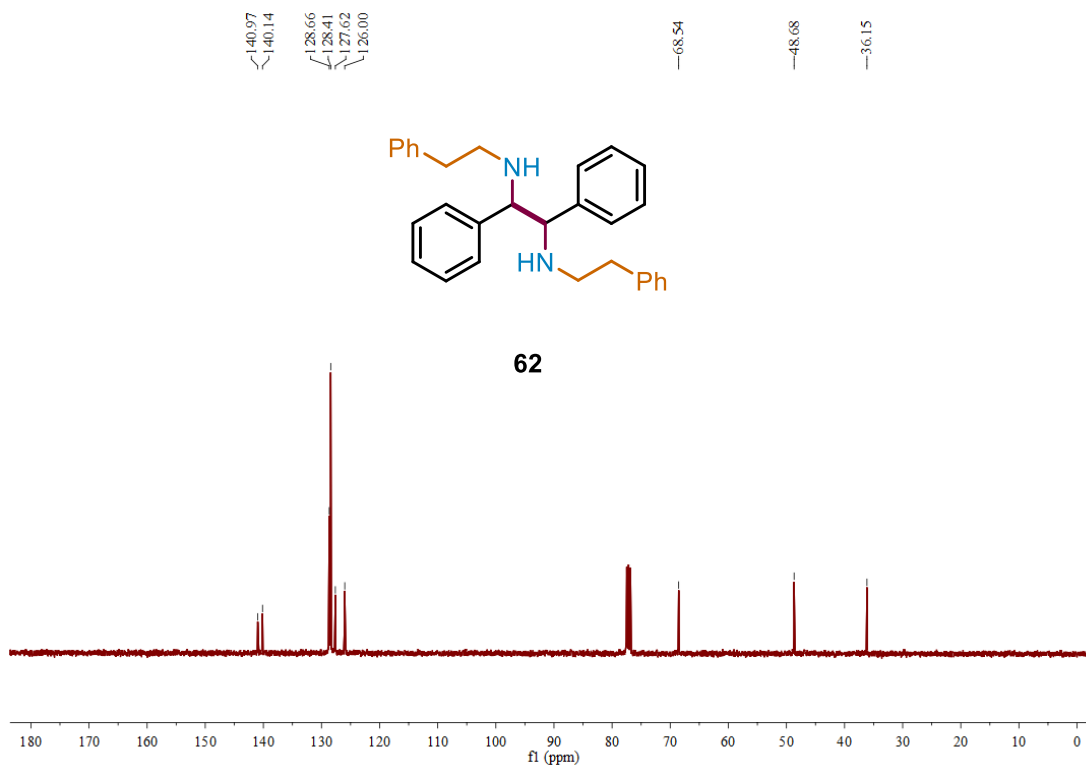

**<sup>1</sup>H NMR (400 MHz, CDCl<sub>3</sub>) spectrum of compound 63**

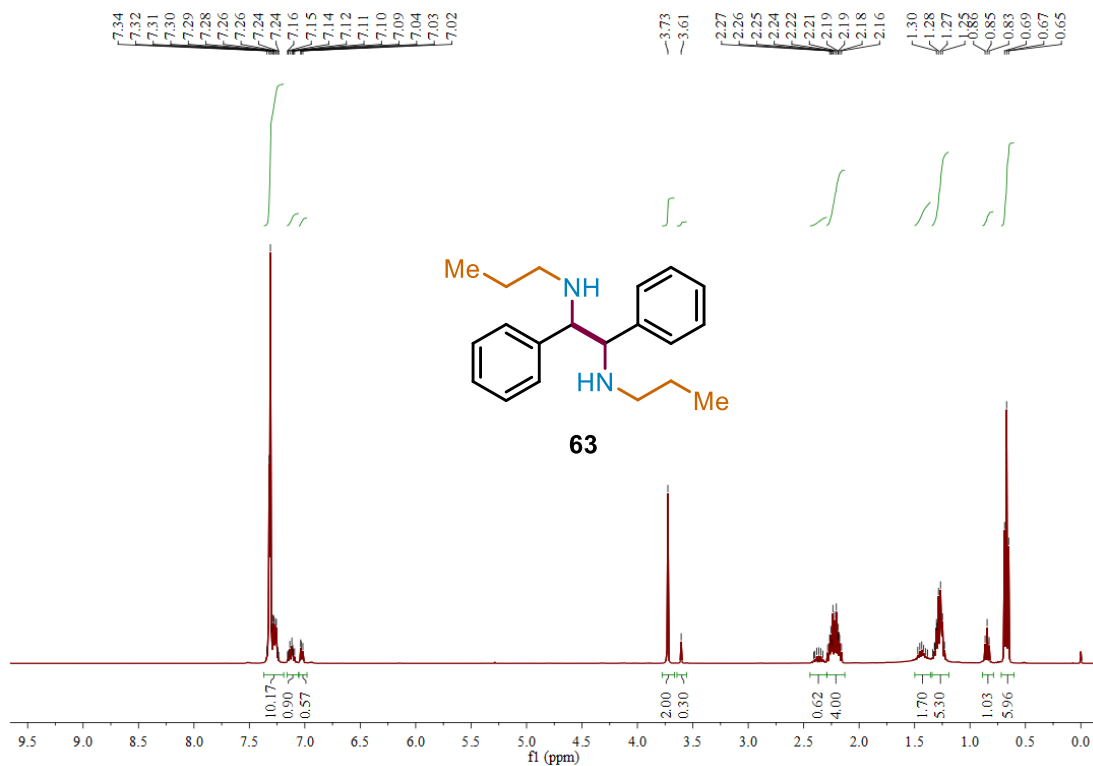

**<sup>13</sup>C NMR (100 MHz, CDCl<sub>3</sub>) spectrum of compound 63**

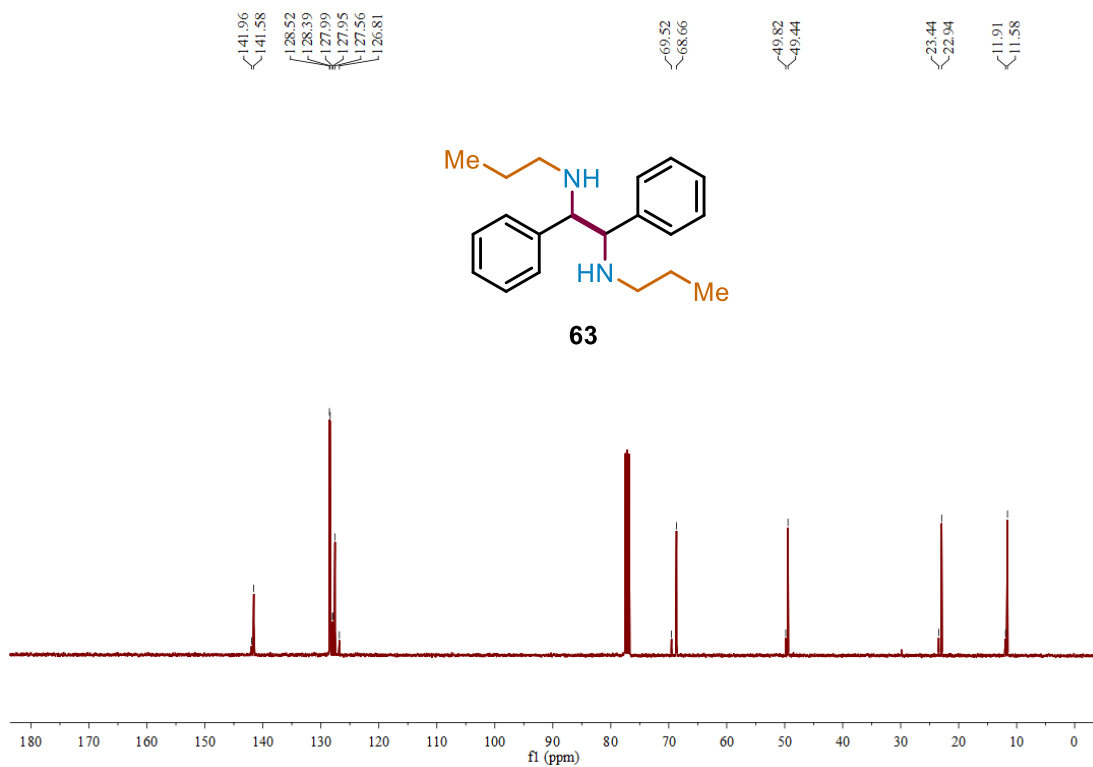

**<sup>1</sup>H NMR (400 MHz, CDCl<sub>3</sub>) spectrum of compound 64**

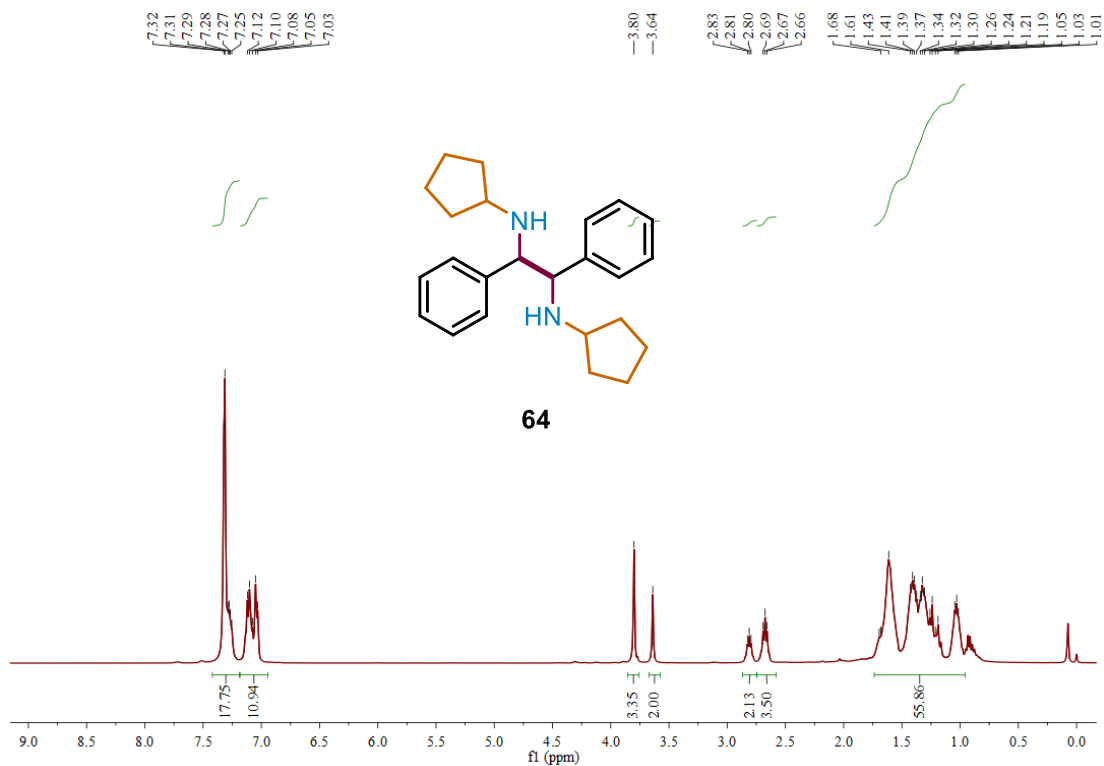

**<sup>13</sup>C NMR (100 MHz, CDCl<sub>3</sub>) spectrum of compound 64**

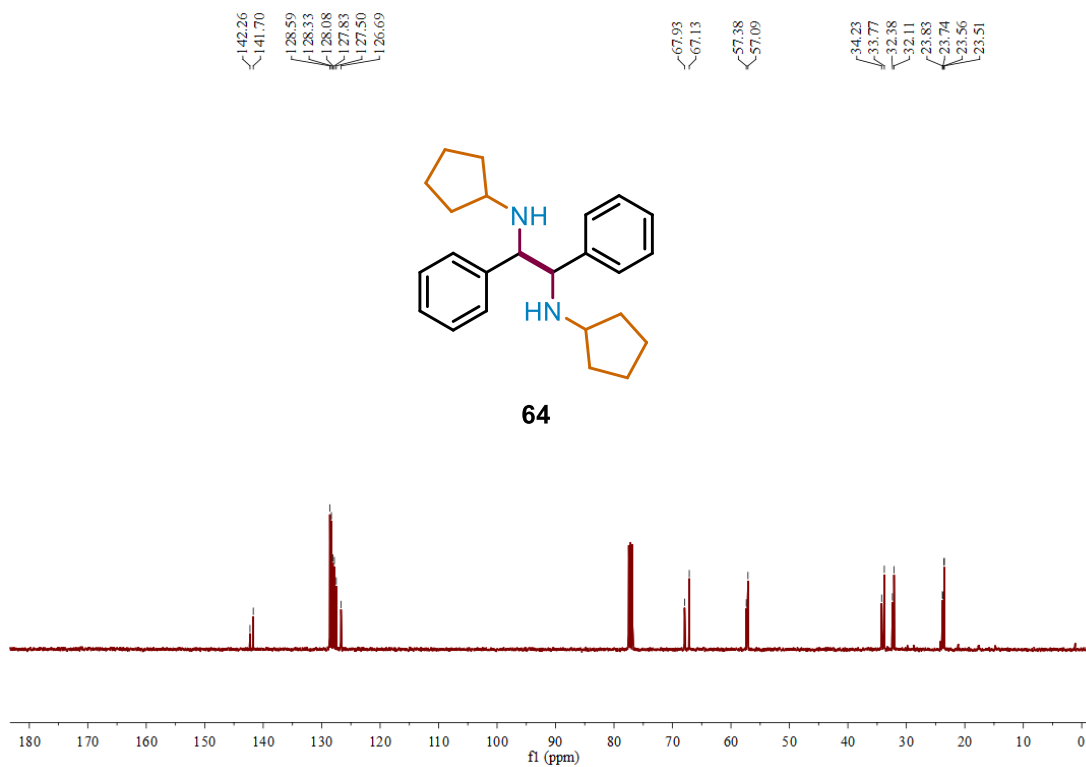

**<sup>1</sup>H NMR (400 MHz, CDCl<sub>3</sub>) spectrum of compound 65**

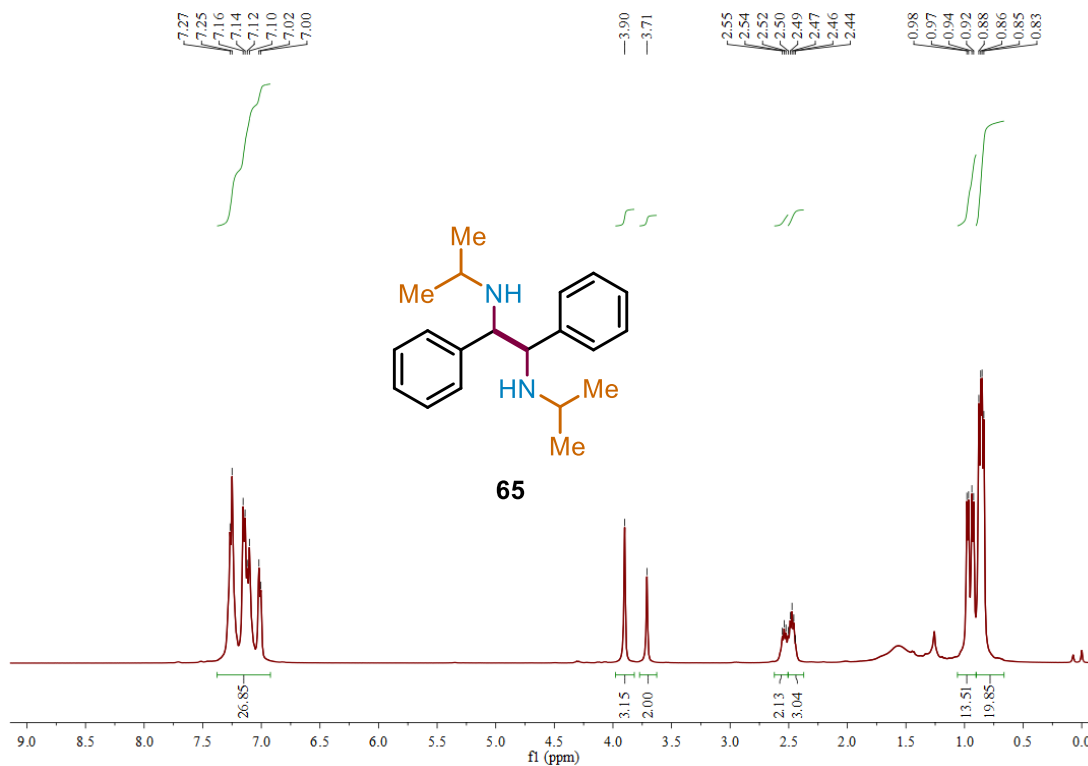

**<sup>13</sup>C NMR (100 MHz, CDCl<sub>3</sub>) spectrum of compound 65**

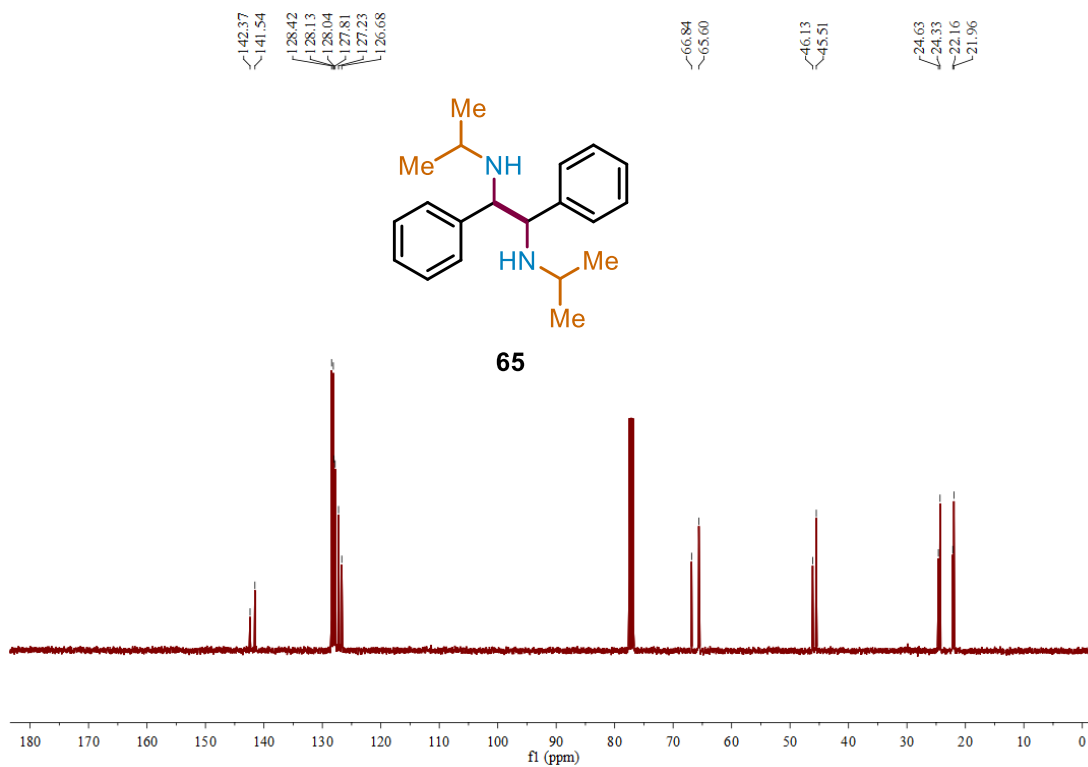

**<sup>1</sup>H NMR (400 MHz, CDCl<sub>3</sub>) spectrum of compound (R, S + S, S)-66**

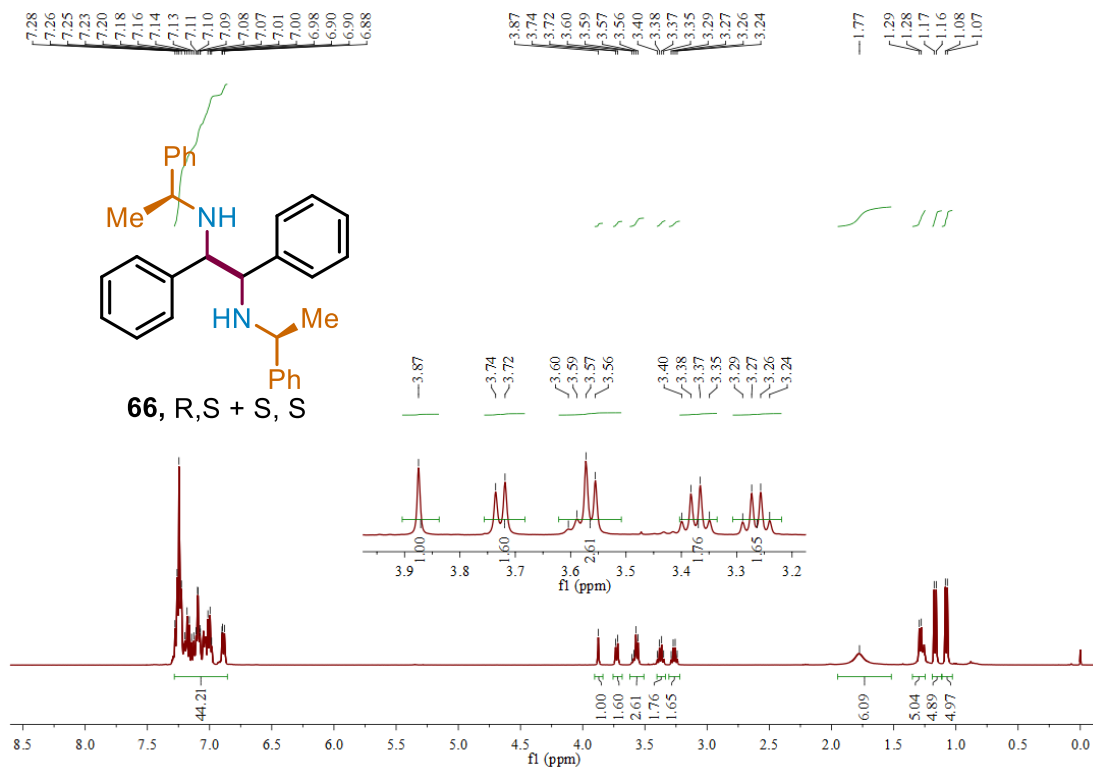

**<sup>13</sup>C NMR (100 MHz, CDCl<sub>3</sub>) spectrum of compound (R, S + S, S)-66**

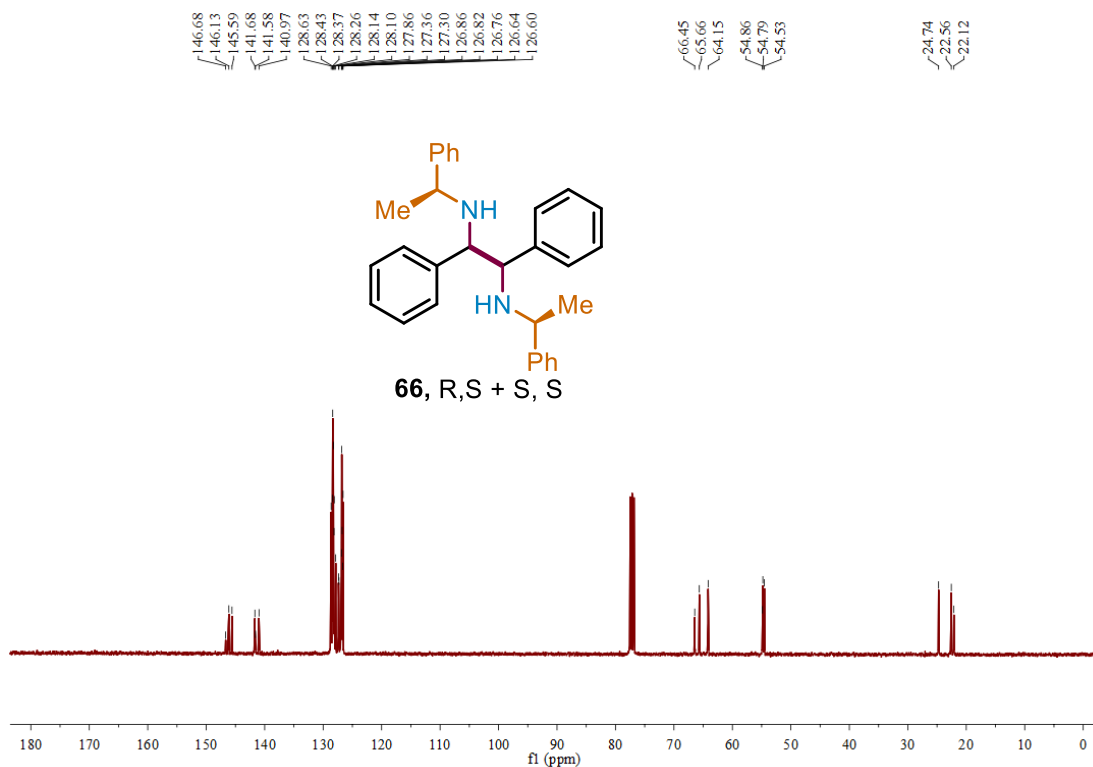



**<sup>1</sup>H NMR (400 MHz, CDCl<sub>3</sub>) spectrum of compound (R, R)-66**

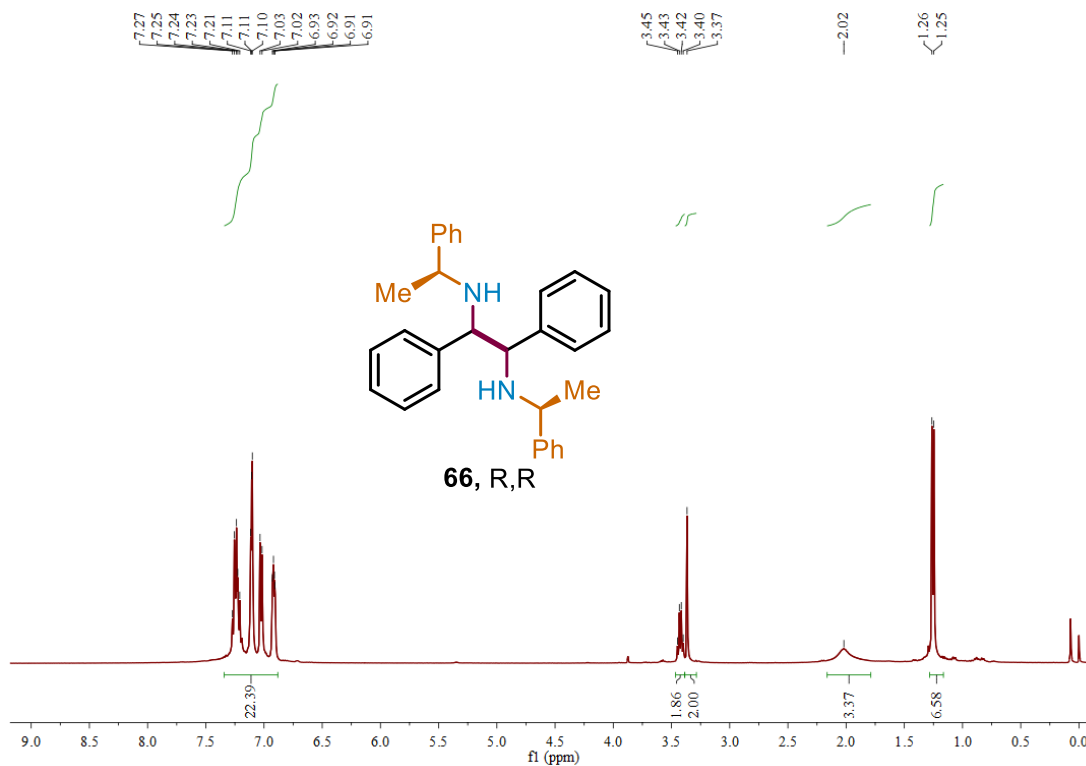

**<sup>13</sup>C NMR (100 MHz, CDCl<sub>3</sub>) spectrum of compound (R, R)-66**

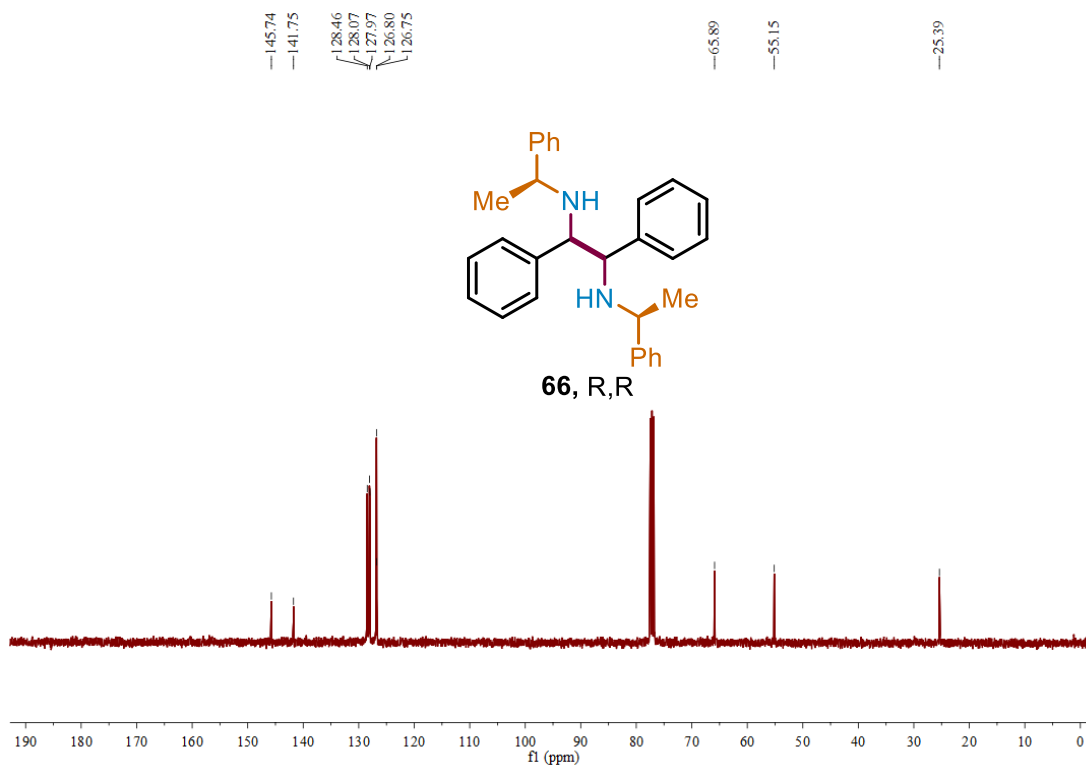

Supplement: d3gc00054k1.pdf [file d3gc00054k1.pdf]
